# Supplementary material for: 2,4-Disubstituted pyridine derivatives are effective against intracellular and biofilm-forming tubercle bacilli
Source: Front Pharmacol. 2022 Nov 10;13:1004632. doi: 10.3389/fphar.2022.1004632 (PMC9685343; doi:10.3389/fphar.2022.1004632)
Supplement: Supplementary file 1 [file DataSheet3.xlsx]

## Sheet: MS-MS data
Supplementary Table. The summary results of MaxQuant analysis performed on the proteomic samples obtained from whole cell lysates of the wild type strain (H37Rv, Rv) and the same strain treated with compounds 11 and 15, respectively.
MaxQuant Intensity and corresponding CPM values are shown. Grey background marks the proteins overexpressed in response to both compounds.
CPM - counts per million
MaxQuant computes protein intensities as the sum of all identified peptide intensities (maximum detector peak intensities of the peptide elution profile, including all peaks in the isotope cluster).
Fasta headers	Intensity 11_1	Intensity 11_2	Intensity 11_3	Intensity 15_1	Intensity 15_2	Intensity 15_3	Intensity Rv1	Intensity Rv2	Intensity Rv3	Intensity11_1 CPM	Intensity 11_2 CPM	Intensity 11_3 CPM	Intensity 15_1 CPM	Intensity 15_2 CPM	Intensity 15_3 CPM	Intensity Rv1 CPM	Intensity Rv2 CPM	Intensity Rv3 CPM
Rv3160c|Rv3160c|Possible transcriptional regulatory protein (probably TetR-family)|213 AA	81308000	0	0	41298000	287130000	477540000	0	0	0	64.731	0	0	128.215	875.707	1819.32	0	0	0
Rv1888c|Rv1888c|Possible transmembrane protein|186 AA	0	0	0	77226000	130010000	71294000	0	0	0	0	0	0	239.759	396.513	271.614	0	0	0
Rv1773c|Rv1773c|Probable transcriptional regulatory protein|248 AA	49046000	15128000	0	60228000	99713000	41827000	0	0	0	39.047	11.693	0	186.986	304.111	159.351	0	0	0
Rv0451c|mmpS4|Probable conserved membrane protein MmpS4|140 AA	37481000	0	0	58527000	93943000	45367000	0	0	0	29.84	0	0	181.705	286.513	172.838	0	0	0
Rv1807|PPE31|PPE family protein PPE31|399 AA	241700000	823190000	0	152340000	51199000	38100000	0	0	0	192.423	636.274	0	472.961	156.15	145.152	0	0	0
Rv2132|Rv2132|Conserved hypothetical protein|76 AA	26674000	0	0	33363000	66034000	36941000	0	0	0	21.236	0	0	103.58	201.395	140.737	0	0	0
Rv1646|PE17|PE family protein PE17|310 AA	53047000	0	0	43610000	55223000	26695000	0	0	0	42.232	0	0	135.393	168.423	101.702	0	0	0
Rv3230c|Rv3230c|Hypothetical oxidoreductase|380 AA /aerobic desaturation system responsible for the synthesis of oleic acid from stearoyl-CoA/	59981000	37740000	17292000	32737000	30372000	31466000	0	0	0	47.752	29.171	12.33	101.637	92.63	119.878	0	0	0
Rv3717|Rv3717|Conserved hypothetical protein|241 AA	0	62806000	77797000	33313000	26776000	20570000	0	0	0	0	48.545	55.475	103.425	81.663	78.367	0	0	0
Rv2808|Rv2808|Hypothetical protein|85 AA / 4-oxalocrotonate/	79721000	76318000	65738000	20970000	23027000	24722000	0	0	0	63.468	58.989	46.876	65.104	70.229	94.185	0	0	0
Rv1076|lipU|Possible lipase LipU|297 AA	26819000	0	33361000	18604000	36801000	13371000	0	0	0	21.351	0	23.789	57.759	112.238	50.94	0	0	0
Rv1385|pyrF|Probable orotidine 5-phosphate decarboxylase PyrF (OMP decarboxylase) (ompdecase)|274 AA	0	0	0	11657000	42546000	16840000	0	0	0	0	0	0	36.191	129.759	64.157	0	0	0
Rv0835|lpqQ|Possible lipoprotein LpqQ|214 AA	13450000	0	0	14996000	20815000	10419000	0	0	0	10.708	0	0	46.557	63.483	39.694	0	0	0
Rv1632c|Rv1632c|Hypothetical protein|147 AA	0	0	0	28247000	7718900	16016000	0	0	0	0	0	0	87.697	23.542	61.017	0	0	0
Rv3054c|Rv3054c|Conserved hypothetical protein|184 AA	141950000	126500000	205080000	25800000	400440000	30206000	0	47743000	0	113.01	97.777	146.237	80.1	1221.29	115.078	0	13.554	0
Rv2240c|Rv2240c|Unknown protein|196 AA	0	112860000	0	127130000	0	94238000	0	0	0	0	87.234	0	394.693	0	359.025	0	0	0
Rv0648|Rv0648|Alpha-mannosidase|1215 AA	0	0	21391000	26660000	300340000	0	0	0	0	0	0	15.253	82.77	915.996	0	0	0	0
Rv1906c|Rv1906c|Conserved protein|156 AA	438200000	164120000	202570000	97473000	50421000	70234000	0	0	47010000	348.862	126.854	144.447	302.619	153.777	267.575	0	0	14.52
Rv1487|Rv1487|Conserved membrane protein|144 AA	0	0	44152000	80258000	0	72017000	0	0	0	0	0	31.484	249.172	0	274.368	0	0	0
Rv1465|Rv1465|Possible nitrogen fixation related protein|162 AA	0	0	20962000	0	71317000	55860000	0	0	0	0	0	14.947	0	217.507	212.814	0	0	0
Rv0301|vapC2|Possible toxin VapC2|141 AA	33814000	141100000	55470000	58239000	110120000	40830000	0	0	75019000	26.92	109.061	39.554	180.811	335.851	155.553	0	0	23.172
Rv2641|cadI|Cadmium inducible protein CadI|152 AA	0	68621000	1123500000	0	33578000	109190000	0	0	0	0	53.04	801.137	0	102.408	415.989	0	0	0
Rv1566c|Rv1566c|Possible Inv protein|230 AA	46213000	0	51374000	36176000	63902000	44391000	0	36446000	0	36.791	0	36.633	112.313	194.892	169.12	0	10.347	0
Rv2138|lppL|Probable conserved lipoprotein LppL|358 AA	50486000	0	38059000	36297000	0	67507000	0	0	0	40.193	0	27.139	112.689	0	257.186	0	0	0
Rv0141c|Rv0141c|Unknown protein|136 AA	279870000	196010000	0	26583000	58440000	0	0	0	0	222.812	151.503	0	82.531	178.234	0	0	0	0
Rv1417|Rv1417|Possible conserved membrane protein|154 AA	56517000	0	0	28659000	44654000	0	0	0	0	44.995	0	0	88.976	136.189	0	0	0	0
Rv3755c|Rv3755c|Conserved protein|199 AA	223570000	0	0	36348000	0	38904000	0	0	0	177.99	0	0	112.847	0	148.215	0	0	0
Rv1312|Rv1312|Conserved hypothetical secreted protein|147 AA	149660000	222590000	0	43785000	22539000	0	0	0	0	119.148	172.048	0	135.937	68.741	0	0	0	0
Rv2794c|pptT|Phosphopantetheinyl transferase PptT (CoA:APO-[ACP]pantetheinephosphotransferase) (CoA:APO-[acyl-carrier protein]pantetheinephosphotransferase)|227 AA	48557000	0	0	18909000	29900000	0	0	0	0	38.657	0	0	58.706	91.191	0	0	0	0
Rv3617|ephA|Probable epoxide hydrolase EphA (epoxide hydratase) (arene-oxide hydratase)|322 AA	0	0	26843000	21195000	37215000	26525000	42227000	0	0	0	0	19.141	65.803	113.501	101.054	13.181	0	0
Rv0762c|Rv0762c|Conserved hypothetical protein|181 AA	0	0	12038000	21139000	42885000	22058000	0	48577000	0	0	0	8.584	65.629	130.793	84.036	0	13.791	0
Rv1990c|Rv1990c|Probable transcriptional regulatory protein|113 AA	53562000	115610000	71781000	16466000	52893000	22028000	55440000	0	0	42.642	89.359	51.185	51.121	161.316	83.922	17.306	0	0
Rv1227c|Rv1227c|Probable transmembrane protein|177 AA	14354000	0	57624000	14209000	0	15332000	0	0	0	11.428	0	41.09	44.114	0	58.411	0	0	0
Rv0011c|Rv0011c|Probable conserved transmembrane protein|93 AA	0	0	0	13169000	17312000	57405000	0	54691000	0	0	0	0	40.885	52.799	218.7	0	15.527	0
Rv0616A|vapB29|Possible antitoxin VapB29|75 AA	0	0	0	0	361630000	360860000	0	10643000	0	0	0	0	0	1102.92	1374.79	0	3.022	0
Rv3561|fadD3|Probable fatty-acid-CoA ligase FadD3 (fatty-acid-CoA synthetase) (fatty-acid-CoA synthase)|507 AA	0	0	0	16897000	6729900000	0	0	0	12102000	0	0	0	52.459	20525.3	0	0	0	3.738
Rv0312|Rv0312|Conserved hypothetical proline and threonine rich protein|620 AA	15599000	37606000	0	44415000	586060000	155560000	37850000	29501000	0	12.419	29.067	0	137.893	1787.4	592.648	11.815	8.375	0
Rv0038|Rv0038|Conserved protein|202 AA	1931100000	98978000	45268000	1851400000	77819000	41252000	31073000	115810000	0	1537.4	76.504	32.279	5747.93	237.337	157.161	9.7	32.879	0
Rv2628|Rv2628|Hypothetical protein|120 AA	0	0	0	1264700000	0	1343600000	1262700000	0	0	0	0	0	3926.44	0	5118.81	394.161	0	0
Rv3891c|esxD|Possible ESAT-6 like protein EsxD|107 AA	211160000	168070000	589960000	64284000	127550000	83184000	0	22151000	29767000	168.11	129.908	420.684	199.579	389.01	316.912	0	6.289	9.194
Rv1350|fabG2|Probable 3-oxoacyl-[acyl-carrier protein] reductase FabG2 (3-ketoacyl-acyl carrier protein reductase)|247 AA	0	165980000	0	87956000	125850000	0	0	0	20697000	0	128.292	0	273.072	383.825	0	0	0	6.393
Rv3536c|hsaE|Probable hydratase|261 AA	71766000	194790000	34894000	60512000	98862000	58674000	20743000	0	61109000	57.135	150.56	24.882	187.868	301.515	223.534	6.475	0	18.875
Rv2252|Rv2252|Diacylglycerol kinase|309 AA	42718000	76923000	126870000	224970000	73064000	80579000	0	64425000	57905000	34.009	59.457	90.467	698.451	222.835	306.988	0	18.29	17.885
Rv2710|sigB|RNA polymerase sigma factor SigB|323 AA	63243000	18982000	66307000	158980000	46097000	35066000	31176000	0	27398000	50.349	14.672	47.282	493.576	140.59	133.593	9.732	0	8.463
Rv2597|Rv2597|Probable membrane protein|206 AA	0	154030000	199770000	98833000	259130000	190650000	0	101180000	205150000	0	119.055	142.45	306.841	790.311	726.333	0	28.725	63.366
Rv1809|PPE33|PPE family protein PPE33|468 AA	607000000	201060000	290580000	73676000	0	48718000	0	0	17586000	483.248	155.407	207.205	228.737	0	185.604	0	0	5.432
Rv3731|ligC|Possible ATP-dependent DNA ligase LigC (polydeoxyribonucleotide synthase [ATP]) (polynucleotide ligase [ATP]) (sealase) (DNA repair protein) (DNA joinase)|358 AA	79702000	129930000	0	77873000	222140000	85984000	77768000	0	130160000	63.453	100.428	0	241.768	677.496	327.579	24.276	0	40.203
Rv2554c|Rv2554c|Conserved protein|170 AA	0	35588000	107270000	87005000	143880000	82036000	0	58221000	104400000	0	27.507	76.491	270.119	438.814	312.538	0	16.529	32.247
Rv0309|Rv0309|Possible conserved exported protein|218 AA	28630000	134200000	48968000	67531000	0	72783000	0	0	37496000	22.793	103.728	34.918	209.659	0	277.287	0	0	11.582
Rv3455c|truA|Probable tRNA pseudouridine synthase a TruA (pseudouridylate synthase I) (pseudouridine synthase I) (uracil hydrolyase)|256 AA	0	0	28156000	0	59910000	43321000	0	24305000	0	0	0	20.077	0	182.717	165.043	0	6.9	0
Rv0743c|Rv0743c|Hypothetical protein|185 AA	0	37685000	82837000	38388000	42302000	17835000	0	16417000	18783000	0	29.128	59.069	119.181	129.015	67.947	0	4.661	5.802
Rv3618|Rv3618|Possible monooxygenase|395 AA	0	0	0	23239000	36076000	0	12392000	0	0	0	0	0	72.149	110.027	0	3.868	0	0
Rv3310|sapM|Acid phosphatase (acid phosphomonoesterase) (phosphomonoesterase) (glycerophosphatase)|299 AA	0	97989000	0	0	66665000	0	0	0	0	0	75.739	0	0	203.319	0	0	0	0
Rv2239c|Rv2239c|Conserved hypothetical protein|158 AA	219190000	279330000	393430000	101740000	108450000	97599000	93871000	0	154690000	174.503	215.904	280.544	315.866	330.758	371.83	29.302	0	47.78
Rv2156c|murX|Probable phospho-N-acetylmuramoyl-pentappeptidetransferase MurX|359 AA	13242000	0	0	0	57942000	0	0	0	0	10.542	0	0	0	176.715	0	0	0	0
Rv2799|Rv2799|Probable membrane protein|209 AA	94972000	30553000	0	0	0	60761000	0	0	0	75.61	23.616	0	0	0	231.485	0	0	0
Rv0908|ctpE|Probable metal cation transporter ATPase P-type CtpE|797 AA	0	29935000	84039000	20035000	0	100080000	0	0	35454000	0	23.138	59.926	62.201	0	381.282	0	0	10.951
Rv0220|lipC|Probable esterase LipC|403 AA	0	22052000	65715000	0	47796000	0	0	0	0	0	17.045	46.86	0	145.771	0	0	0	0
Rv3316|sdhC|Probable succinate dehydrogenase (cytochrome B-556 subunit) SdhC (succinic dehydrogenase) (fumarate reductase) (fumarate dehydrogenase) (fumaric hydrogenase)|112 AA	0	45674000	88259000	0	56407000	22408000	0	24360000	0	0	35.303	62.935	0	172.034	85.369	0	6.916	0
Rv3492c|Rv3492c|Conserved hypothetical Mce associated protein|160 AA	21826000	0	52105000	29419000	106490000	35378000	0	32849000	90572000	17.376	0	37.155	91.335	324.78	134.782	0	9.326	27.975
Rv3100c|smpB|Probable SSRA-binding protein SmpB|160 AA	0	0	0	0	29922000	31171000	22748000	0	0	0	0	0	0	91.258	118.754	7.101	0	0
Rv0559c|Rv0559c|Possible conserved secreted protein|112 AA	52719000	61695000	47616000	39405000	69080000	56771000	0	56890000	65700000	41.971	47.686	33.954	122.338	210.684	216.285	0	16.151	20.293
Rv3479|Rv3479|Possible transmembrane protein|1021 AA	41807000	61328000	0	16936000	46592000	31965000	26267000	25191000	0	33.284	47.403	0	52.58	142.099	121.779	8.199	7.152	0
Rv3860|Rv3860|Conserved protein|390 AA	0	0	9666100	25212000	0	37131000	23619000	0	0	0	0	6.893	78.274	0	141.461	7.373	0	0
Rv1822|pgsA2|Probable CDP-diacylglycerol--glycerol-3-phosphate 3-phosphatidyltransferase PgsA2 (PGP synthase) (phosphatidylglycerophosphate synthase) (3-phosphatidyl-1-glycerol-3phosphate synthase)|209 AA	48460000	18907000	36164000	0	33975000	0	0	0	0	38.58	14.614	25.788	0	103.619	0	0	0	0
Rv2689c|Rv2689c|Conserved alanine and valine and glycine rich protein|405 AA	0	0	43310000	22359000	20173000	0	0	0	12983000	0	0	30.883	69.417	61.525	0	0	0	4.01
Rv1033c|trcR|Two component transcriptional regulator TrcR|257 AA	0	0	106810000	37643000	0	0	0	0	0	0	0	76.163	116.868	0	0	0	0	0
Rv2604c|snoP|Probable glutamine amidotransferase SnoP|198 AA	95275000	66363000	60409000	37628000	0	0	0	0	0	75.851	51.294	43.076	116.821	0	0	0	0	0
Rv3312A|Rv3312A|Secreted protein antigen|103 AA	91394000	140290000	140660000	0	0	38781000	0	0	0	72.761	108.435	100.301	0	0	147.747	0	0	0
Rv2593c|ruvA|Probable holliday junction DNA helicase RuvA|196 AA	65837000	101220000	0	28436000	55592000	50526000	99247000	0	25785000	52.414	78.237	0	88.284	169.548	192.492	30.981	0	7.964
Rv1956|higA|Possible antitoxin HigA|149 AA	0	0	0	26242000	0	36168000	0	0	29362000	0	0	0	81.472	0	137.792	0	0	9.069
Rv3249c|Rv3249c|Possible transcriptional regulatory protein (probably TetR-family)|211 AA	31148000	21273000	44106000	41753000	77137000	24318000	0	74405000	39206000	24.798	16.443	31.451	129.628	235.257	92.646	0	21.124	12.11
Rv3768|Rv3768|Unknown protein|119 AA	16494000	38680000	0	21847000	0	37614000	26618000	0	0	13.131	29.897	0	67.827	0	143.301	8.309	0	0
Rv2821c|Rv2821c|Conserved hypothetical protein|236 AA	49580000	32548000	31009000	37149000	19263000	39778000	21996000	35177000	0	39.472	25.158	22.112	115.334	58.749	151.545	6.866	9.987	0
Rv2043c|pncA|Pyrazinamidase/nicotinamidase PncA (PZase)|186 AA	0	0	0	43478000	81053000	39253000	0	79154000	68011000	0	0	0	134.984	247.2	149.545	0	22.472	21.007
Rv3494c|mce4F|Mce-family protein Mce4F|564 AA	0	36865000	29957000	0	24567000	26785000	27401000	0	0	0	28.494	21.362	0	74.926	102.045	8.553	0	0
Rv0558|menH|Probable ubiquinone/menaquinone biosynthesis methyltransferase MenH (2-heptaprenyl-1	112810000	170610000	0	63093000	126810000	102030000	0	153800000	204720000	89.811	131.871	0	195.881	386.753	388.711	0	43.664	63.233
Rv3796|Rv3796|Conserved protein|375 AA	0	35067000	25411000	28782000	95766000	31961000	0	88246000	48671000	0	27.105	18.12	89.358	292.073	121.764	0	25.053	15.033
Rv1597|Rv1597|Hypothetical protein|252 AA	43596000	40809000	0	0	0	22170000	0	0	0	34.708	31.543	0	0	0	84.463	0	0	0
Rv2760c|vapB42|Possible antitoxin VapB42|89 AA	0	0	11871000	0	25766000	15767000	0	20223000	0	0	0	8.465	0	78.583	60.069	0	5.741	0
Rv2324|Rv2324|Probable transcriptional regulatory protein (probably AsnC-family)|148 AA	0	0	0	30616000	32713000	0	0	51688000	0	0	0	0	95.052	99.77	0	0	14.674	0
Rv0806c|cpsY|Possible UDP-glucose-4-epimerase CpsY (galactowaldenase) (UDP-galactose-4-epimerase) (uridine diphosphate galactose-4-epimerase) (uridine diphospho-galactose-4-epimerase)|532 AA	0	0	0	63397000	0	32039000	100120000	0	0	0	0	0	196.825	0	122.061	31.253	0	0
Rv0179c|lprO|Possible lipoprotein LprO|369 AA	88908000	32281000	0	19043000	0	0	0	0	0	70.782	24.951	0	59.122	0	0	0	0	0
Rv1494|mazE4|Possible antitoxin MazE4|100 AA	0	0	136410000	0	51824000	28889000	88588000	0	0	0	0	97.27	0	158.056	110.06	27.653	0	0
Rv2576c|Rv2576c|Possible conserved membrane protein|154 AA	229870000	347430000	205700000	0	0	16539000	0	0	0	183.005	268.542	146.679	0	0	63.01	0	0	0
Rv1602|hisH|Probable amidotransferase HisH|206 AA	81615000	130550000	39874000	32117000	62600000	36804000	48164000	0	108340000	64.976	100.907	28.433	99.712	190.921	140.215	15.035	0	33.464
Rv2399c|cysT|Probable sulfate-transport integral membrane protein ABC transporter CysT|283 AA	0	23188000	21115000	0	0	15708000	0	0	0	0	17.923	15.057	0	0	59.844	0	0	0
Rv2420c|Rv2420c|Conserved hypothetical protein|126 AA	0	0	6853600	45752000	103760000	13954000	0	91162000	63638000	0	0	4.887	142.043	316.454	53.162	0	25.881	19.656
Rv1472|echA12|Possible enoyl-CoA hydratase EchA12 (enoyl hydrase) (unsaturated acyl-CoA hydratase) (crotonase)|285 AA	0	0	0	0	22965000	39978000	0	158810000	0	0	0	0	0	70.04	152.307	0	45.086	0
Rv2052c|Rv2052c|Conserved protein|534 AA	0	0	37082000	17467000	51354000	18234000	62327000	77583000	0	0	0	26.442	54.229	156.623	69.467	19.456	22.026	0
Rv2406c|Rv2406c|Conserved protein|142 AA	134260000	185820000	304130000	115300000	48863000	39705000	201190000	280690000	0	106.888	143.627	216.867	357.965	149.025	151.267	62.803	79.688	0
Rv3005c|Rv3005c|Conserved hypothetical protein|279 AA	21380000	0	0	25179000	32669000	30942000	103020000	0	96498000	17.021	0	0	78.172	99.636	117.882	32.158	0	29.806
Rv3587c|Rv3587c|Probable conserved membrane protein|264 AA	265960000	91178000	60193000	94729000	26237000	85419000	0	207810000	310520000	211.737	70.475	42.922	294.099	80.019	325.427	0	58.997	95.912
Rv2919c|glnB|Probable nitrogen regulatory protein P-II GlnB|112 AA	103970000	355400000	237560000	34485000	326610000	23352000	0	493680000	466780000	82.773	274.702	169.397	107.064	996.116	88.966	0	140.156	144.177
Rv3161c|Rv3161c|Possible dioxygenase|382 AA	4840100000	2280900000	3924300000	10993000000	3912100000	5257800000	282580000	238390000	90547000	3853.33	1762.99	2798.31	34129.3	11931.4	20031	88.209	67.679	27.968
Rv0495c|Rv0495c|Conserved hypothetical protein|296 AA	950460000	52399000	105000000	624280000	1493400000	550200000	148010000	197670000	224870000	756.685	40.501	74.873	1938.16	4554.66	2096.14	46.202	56.119	69.457
Rv3569c|hsaD|4	0	104780000	34538000	54827000	5634900000	3021400000	453770000	218870000	407870000	0	80.988	24.628	170.218	17185.7	11510.8	141.647	62.137	125.981
Rv2350c|plcB|Membrane-associated phospholipase C 2 PlcB|512 AA	49224000	387180000	31415000	42180000	1407800000	0	22676000	0	37030000	39.188	299.266	22.401	130.954	4293.6	0	7.078	0	11.438
Rv2700|Rv2700|Possible conserved secreted alanine rich protein|216 AA	249290000	202520000	90242000	33999000	79702000	54959000	13987000	3898300	36932000	198.466	156.535	64.349	105.555	243.08	209.381	4.366	1.107	11.407
Rv1862|adhA|Probable alcohol dehydrogenase AdhA|346 AA	59442000	95880000	119470000	134080000	96119000	0	0	21081000	22658000	47.323	74.109	85.191	416.27	293.15	0	0	5.985	6.999
Rv1151c|Rv1151c|Transcriptional regulatory protein|237 AA	40648000	0	0	105990000	116400000	80915000	28490000	52109000	28819000	32.361	0	0	329.061	355.004	308.268	8.893	14.794	8.901
Rv1924c|Rv1924c|Unknown protein|126 AA	128740000	0	72315000	67643000	232420000	80098000	47042000	38626000	42700000	102.493	0	51.566	210.007	708.849	305.155	14.684	10.966	13.189
Rv3025c|iscS|Cysteine desulfurase IscS (NIFS protein homolog) (nitrogenase metalloclusters biosynthesis protein NIFS)|393 AA	0	37176000	0	144640000	139200000	79520000	23322000	60221000	98513000	0	28.735	0	449.055	424.541	302.953	7.28	17.097	30.428
Rv2878c|mpt53|Soluble secreted antigen Mpt53 precursor|173 AA	138520000	366660000	48255000	150480000	116190000	135200000	43602000	76718000	52486000	110.279	283.405	34.409	467.186	354.363	515.081	13.611	21.78	16.212
Rv1332|Rv1332|Probable transcriptional regulatory protein|218 AA	24880000	23487000	63173000	51194000	1448800000	804410000	256430000	175300000	217800000	19.808	18.154	45.047	158.939	4418.64	3064.62	80.046	49.768	67.273
Rv2574|Rv2574|Conserved protein|167 AA	32284000	126220000	159750000	0	176970000	0	0	0	19399000	25.702	97.56	113.913	0	539.734	0	0	0	5.992
Rv1367c|Rv1367c|Conserved protein|377 AA	0	112000000	60457000	328980000	319780000	48774000	93995000	122990000	67287000	0	86.569	43.11	1021.36	975.285	185.818	29.341	34.917	20.783
Rv1097c|Rv1097c|Probable membrane glycine and proline rich protein|293 AA	52349000	96991000	26089000	201550000	188940000	129930000	156030000	74447000	50777000	41.676	74.968	18.603	625.74	576.241	495.004	48.706	21.136	15.684
Rv1860|apa|Alanine and proline rich secreted protein Apa (fibronectin attachment protein) (immunogenic protein MPT32) (antigen MPT-32) (45-kDa glycoprotein) (45/47 kDa antigen)|325 AA	801210000	696190000	1080300000	464510000	884090000	412650000	418750000	191580000	345940000	637.863	538.111	770.332	1442.14	2696.35	1572.1	130.716	54.39	106.852
Rv2589|gabT|4-aminobutyrate aminotransferase GabT (gamma-amino-N-butyrate transaminase) (GABA transaminase) (glutamate:succinic semialdehyde transaminase) (GABA aminotransferase) (GABA-at)|449 AA	32593000	169900000	129330000	577960000	767640000	446610000	189340000	276140000	509440000	25.948	131.322	92.222	1794.36	2341.2	1701.48	59.104	78.396	157.354
Rv0343|iniC|Isoniazid inductible gene protein IniC|493 AA	54350000	0	0	57404000	77560000	43994000	20620000	38590000	36038000	43.269	0	0	178.219	236.547	167.607	6.437	10.956	11.131
Rv3068c|pgmA|Probable phosphoglucomutase PgmA (glucose phosphomutase) (PGM)|547 AA	296660000	203860000	36423000	499450000	951100000	433590000	257530000	380140000	372200000	236.178	157.571	25.972	1550.61	2900.72	1651.88	80.39	107.922	114.964
Rv0846c|Rv0846c|Probable oxidase|504 AA	80290000	162450000	90673000	122380000	138620000	59063000	60417000	108300000	24513000	63.921	125.564	64.656	379.946	422.772	225.016	18.86	30.746	7.571
Rv1810|Rv1810|Conserved protein|118 AA	153700000	789170000	1300200000	116380000	319440000	114320000	101520000	101680000	87003000	122.364	609.979	927.136	361.318	974.248	435.533	31.69	28.867	26.873
Rv3083|Rv3083|Probable monooxygenase (hydroxylase)|495 AA	41463000	38189000	93879000	36952000	117310000	60949000	58716000	72829000	12262000	33.01	29.518	66.943	114.723	357.779	232.202	18.329	20.676	3.787
Rv0875c|Rv0875c|Possible conserved exported protein|162 AA	64804000	97967000	46095000	37628000	155810000	42173000	41423000	42845000	41873000	51.592	75.722	32.869	116.821	475.199	160.669	12.93	12.164	12.934
Rv0162c|adhE1|Probable zinc-type alcohol dehydrogenase (E subunit) AdhE1|383 AA	0	0	0	32091000	185810000	55644000	73120000	23772000	65628000	0	0	0	99.631	566.695	211.991	22.825	6.749	20.271
Rv2914c|pknI|Probable transmembrane serine/threonine-protein kinase I PknI (protein kinase I) (STPK I) (phosphorylase B kinase kinase) (hydroxyalkyl-protein kinase)|585 AA	18734000	33390000	0	53765000	60403000	32113000	33011000	45796000	17197000	14.915	25.808	0	166.921	184.221	122.343	10.305	13.002	5.312
Rv3600c|Rv3600c|Conserved protein|272 AA	0	0	153840000	0	44778000	168710000	25915000	0	77662000	0	0	109.699	0	136.567	642.746	8.09	0	23.988
Rv2147c|Rv2147c|Conserved hypothetical protein|241 AA	227630000	277180000	0	31832000	562500000	33302000	101060000	165260000	17769000	181.222	214.243	0	98.827	1715.55	126.873	31.547	46.917	5.488
Rv2702|ppgK|Polyphosphate glucokinase PpgK (polyphosphate-glucose phosphotransferase)|265 AA	45788000	192260000	102520000	61599000	75940000	0	0	29488000	48292000	36.453	148.605	73.104	191.243	231.607	0	0	8.372	14.916
Rv1842c|Rv1842c|Conserved hypothetical membrane protein|455 AA	0	31678000	0	0	38811000	0	13121000	0	0	0	24.485	0	0	118.368	0	4.096	0	0
Rv3824c|papA1|Conserved polyketide synthase associated protein PapA1|511 AA	80352000	80405000	230650000	35640000	118320000	0	27720000	0	51894000	63.97	62.148	164.47	110.649	360.86	0	8.653	0	16.029
Rv3478|PPE60|PE family protein PPE60|393 AA	3559300000	2532500000	4469400000	68654000	171230000	55936000	47609000	69455000	75127000	2833.65	1957.46	3187.01	213.146	522.228	213.103	14.861	19.718	23.205
Rv2037c|Rv2037c|Conserved transmembrane protein|324 AA	0	48004000	0	74584000	51608000	0	0	41590000	32010000	0	37.104	0	231.556	157.397	0	0	11.807	9.887
Rv3106|fprA|NADPH:adrenodoxin oxidoreductase FprA (NADPH-ferredoxin reductase)|456 AA	77138000	120100000	33493000	145600000	1535900000	80590000	243840000	248960000	258040000	61.412	92.83	23.883	452.036	4684.28	307.029	76.116	70.68	79.702
Rv3287c|rsbW|Anti-sigma factor RsbW (sigma negative effector)|145 AA	0	81363000	0	168160000	86939000	0	0	109500000	51094000	0	62.888	0	522.076	265.152	0	0	31.087	15.782
Rv1606|hisI|Probable phosphoribosyl-AMP 1	46222000	24190000	63479000	0	166720000	0	74644000	0	0	36.798	18.697	45.265	0	508.473	0	23.301	0	0
Rv1287|Rv1287|Conserved hypothetical protein|161 AA	113040000	153120000	151890000	213710000	94532000	180210000	71315000	136590000	109500000	89.994	118.352	108.309	663.493	288.31	686.559	22.261	38.778	33.822
Rv1299|prfA|Probable peptide chain release factor 1 PrfA (RF-1)|357 AA	152770000	102830000	202380000	57497000	108600000	57226000	20973000	59569000	129300000	121.624	79.481	144.312	178.507	331.215	218.018	6.547	16.912	39.938
Rv3666c|dppA|Probable periplasmic dipeptide-binding lipoprotein DppA|541 AA	0	22415000	26289000	0	42094000	0	0	21127000	0	0	17.325	18.746	0	128.381	0	0	5.998	0
Rv3878|espJ|ESX-1 secretion-associated protein EspJ. Conserved alanine rich protein.|280 AA	72340000	95429000	12648000	0	78735000	0	0	40703000	0	57.592	73.761	9.019	0	240.131	0	0	11.556	0
Rv3197|Rv3197|Probable conserved ATP-binding protein ABC transporter|447 AA	442490000	482580000	535690000	142630000	369230000	159390000	168950000	321750000	91276000	352.277	373.004	381.986	442.815	1126.1	607.239	52.739	91.345	28.193
Rv0481c|Rv0481c|Hypothetical protein|174 AA	0	33022000	35770000	0	0	171430000	89309000	0	0	0	25.524	25.507	0	0	653.109	27.878	0	0
Rv0677c|mmpS5|Possible conserved membrane protein MmpS5|142 AA	33436000	49046000	15109000	41967000	0	61005000	42518000	31501000	0	26.619	37.909	10.774	130.292	0	232.415	13.272	8.943	0
Rv1167c|Rv1167c|Probable transcriptional regulatory protein|201 AA	55974000	40470000	37405000	0	22888000	0	0	14475000	0	44.562	31.281	26.672	0	69.805	0	0	4.109	0
Rv2000|Rv2000|Unknown protein|537 AA	164050000	249340000	87160000	109400000	207560000	84346000	112770000	249640000	43919000	130.604	192.724	62.151	339.648	633.029	321.339	35.202	70.873	13.566
Rv1393c|Rv1393c|Probable monoxygenase|492 AA	232960000	155640000	62740000	0	0	21708000	0	12609000	0	185.465	120.3	44.738	0	0	82.703	0	3.58	0
Rv1216c|Rv1216c|Probable conserved integral membrane protein|224 AA	0	11305000	30124000	0	0	35677000	22496000	0	0	0	8.738	21.481	0	0	135.921	7.022	0	0
Rv3226c|Rv3226c|Conserved hypothetical protein|252 AA	89913000	101500000	140210000	57055000	57227000	38086000	103900000	41904000	21386000	71.582	78.453	99.98	177.135	174.534	145.099	32.433	11.897	6.606
Rv3690|Rv3690|Probable conserved membrane protein|217 AA	0	48141000	48300000	0	32647000	0	0	0	26907000	0	37.21	34.441	0	99.569	0	0	0	8.311
Rv0262c|aac|Aminoglycoside 2-N-acetyltransferase Aac (Aac(2)-IC)|181 AA	108730000	40853000	37847000	19275000	140700000	0	0	59721000	37799000	86.563	31.577	26.988	59.842	429.116	0	0	16.955	11.675
Rv1897c|Rv1897c|Conserved hypothetical protein|143 AA	44197000	0	0	0	68906000	0	62135000	0	0	35.186	0	0	0	210.154	0	19.396	0	0
Rv2251|Rv2251|Possible flavoprotein|475 AA	298550000	1050900000	475830000	97696000	832080000	790380000	531430000	253990000	537130000	237.683	812.279	339.301	303.311	2537.73	3011.17	165.89	72.108	165.906
Rv3413c|Rv3413c|Unknown alanine and proline rich protein|299 AA	45662000	114710000	126730000	24955000	92950000	103270000	54343000	157460000	21817000	36.353	88.664	90.368	77.476	283.485	393.435	16.964	44.703	6.739
Rv2117|Rv2117|Conserved hypothetical protein|97 AA	0	0	0	0	18808000	62400000	0	31210000	32885000	0	0	0	0	57.362	237.73	0	8.861	10.157
Rv0200|Rv0200|Possible conserved transmembrane protein|229 AA	94330000	209040000	68627000	76914000	38454000	0	0	64688000	42709000	75.098	161.575	48.936	238.79	117.279	0	0	18.365	13.192
Rv1226c|Rv1226c|Probable transmembrane protein|487 AA	31097000	61480000	0	0	25282000	0	25899000	0	0	24.757	47.52	0	0	77.107	0	8.085	0	0
Rv1507c|Rv1507c|Conserved protein|231 AA	322900000	217380000	264920000	71829000	266340000	151190000	230380000	119540000	118560000	257.069	168.021	188.907	223.003	812.3	575.999	71.915	33.937	36.62
Rv0535|pnp|Probable 5-methylthioadenosine phosphorylase Pnp (MTA phosphorylase)|264 AA	66490000	80198000	0	0	34424000	0	0	0	36189000	52.934	61.988	0	0	104.988	0	0	0	11.178
Rv1984c|cfp21|Probable cutinase precursor CFP21|217 AA	1689900000	1526500000	1550200000	175060000	282580000	196780000	202810000	415630000	107180000	1345.37	1179.89	1105.4	543.498	861.83	749.687	63.309	117.998	33.105
Rv2875|mpt70|Major secreted immunogenic protein Mpt70|193 AA	254900000	306210000	239230000	0	0	0	0	0	0	202.932	236.681	170.588	0	0	0	0	0	0
Rv2190c|Rv2190c|Conserved hypothetical protein|385 AA	78939000	86748000	144180000	0	0	0	0	0	0	62.845	67.051	102.811	0	0	0	0	0	0
Rv0740|Rv0740|Conserved hypothetical protein|175 AA	81544000	156520000	28046000	0	0	0	0	0	0	64.919	120.98	19.999	0	0	0	0	0	0
Rv1910c|Rv1910c|Probable exported protein|197 AA	34651000	55237000	36058000	0	0	0	0	0	0	27.587	42.695	25.712	0	0	0	0	0	0
Rv2907c|rimM|Probable 16S rRNA processing protein RimM|176 AA	26524000	35202000	31185000	0	0	0	0	0	0	21.116	27.209	22.237	0	0	0	0	0	0
Rv0168|yrbE1B|Conserved integral membrane protein YrbE1B|289 AA	0	35531000	61846000	0	0	0	0	0	0	0	27.463	44.101	0	0	0	0	0	0
Rv0398c|Rv0398c|Possible secreted protein|213 AA	41420000	0	41147000	0	0	0	0	0	0	32.976	0	29.341	0	0	0	0	0	0
Rv2725c|hflX|Probable GTP-binding protein HflX|495 AA	23640000	28645000	0	0	0	0	0	0	0	18.82	22.141	0	0	0	0	0	0	0
Rv1394c|cyp132|Probable cytochrome P450 132 Cyp132|461 AA	0	150440000	0	0	0	0	0	0	0	0	116.281	0	0	0	0	0	0	0
Rv2352c|PPE38|PPE family protein PPE38|391 AA	79447000	97878000	319110000	0	0	0	0	0	0	63.25	75.654	227.548	0	0	0	0	0	0
Rv0880|Rv0880|Possible transcriptional regulatory protein (possibly MarR-family)|143 AA	221710000	85645000	110170000	0	0	0	0	0	0	176.509	66.198	78.559	0	0	0	0	0	0
Rv1754c|Rv1754c|Conserved protein|563 AA	43027000	153760000	100660000	0	0	0	0	0	0	34.255	118.847	71.778	0	0	0	0	0	0
Rv2093c|tatC|Sec-independent protein translocase transmembrane protein TatC|308 AA	73911000	52641000	62429000	0	0	0	0	0	0	58.842	40.688	44.516	0	0	0	0	0	0
Rv3004|cfp6|Low molecular weight protein antigen 6 (CFP-6)|112 AA	59903000	50245000	73594000	0	0	0	0	0	0	47.69	38.836	52.478	0	0	0	0	0	0
Rv2181|Rv2181|Alpha(1->2)mannosyltransferase|427 AA	44591000	88799000	32836000	0	0	0	0	0	0	35.5	68.636	23.414	0	0	0	0	0	0
Rv2537c|aroD|3-dehydroquinate dehydratase AroD (AROQ) (3-dehydroquinase) (type II dhqase)|147 AA	116960000	70389000	54255000	0	0	0	0	0	0	93.115	54.406	38.688	0	0	0	0	0	0
Rv2297|Rv2297|Unknown protein|150 AA	0	26096000	34894000	59603000	0	75237000	56223000	0	73961000	0	20.171	24.882	185.046	0	286.636	17.55	0	22.845
Rv1014c|pth|Probable peptidyl-tRNA hydrolase Pth|191 AA	0	0	88314000	30770000	0	0	31413000	0	0	0	0	62.974	95.53	0	0	9.806	0	0
Rv0958|Rv0958|Possible magnesium chelatase|459 AA	0	0	0	38977000	61629000	25394000	25117000	41492000	65641000	0	0	0	121.01	187.96	96.745	7.84	11.78	20.275
Rv1188|Rv1188|Probable proline dehydrogenase|329 AA	33310000	0	11054000	0	0	18758000	19155000	0	0	26.519	0	7.882	0	0	71.464	5.979	0	0
Rv1461|Rv1461|Conserved protein|846 AA	457230000	604810000	682640000	466620000	435510000	288710000	292280000	497730000	396320000	364.012	467.48	486.772	1448.69	1328.25	1099.92	91.237	141.306	122.414
Rv0472c|Rv0472c|Probable transcriptional regulatory protein (possibly TetR-family)|234 AA	308290000	160230000	261820000	232030000	146660000	189960000	131310000	238470000	172810000	245.437	123.848	186.697	720.37	447.293	723.704	40.989	67.702	53.377
Rv0216|Rv0216|Double hotdog hydratase|337 AA	262820000	241470000	372970000	198780000	331050000	197880000	147270000	413440000	233820000	209.238	186.641	265.955	617.14	1009.66	753.877	45.971	117.376	72.221
Rv3049c|Rv3049c|Probable monooxygenase|524 AA	0	60256000	99799000	61031000	42840000	33135000	33536000	54027000	50692000	0	46.574	71.164	189.479	130.656	126.237	10.468	15.338	15.658
Rv0975c|fadE13|Probable acyl-CoA dehydrogenase FadE13|382 AA	0	0	0	24168000	24391000	0	33530000	0	23189000	0	0	0	75.033	74.389	0	10.467	0	7.163
Rv2530A|vapB39|Possible antitoxin VapB39|74 AA	0	0	63181000	124340000	160670000	101500000	145250000	164230000	102250000	0	0	45.053	386.031	490.021	386.692	45.341	46.625	31.583
Rv2667|clpC2|Possible ATP-dependent protease ATP-binding subunit ClpC2|252 AA	0	0	0	0	40450000	23448000	35384000	33129000	0	0	0	0	0	123.367	89.332	11.045	9.405	0
Rv1275|lprC|Possible lipoprotein LprC|180 AA	227920000	752860000	61543000	186690000	378700000	314260000	69955000	384800000	898070000	181.453	581.913	43.885	579.605	1154.98	1197.26	21.837	109.245	277.392
Rv2026c|Rv2026c|Universal stress protein family protein|294 AA	163290000	208440000	84021000	32461000	24067000	29108000	30302000	31473000	26354000	129.999	161.111	59.913	100.78	73.401	110.895	9.459	8.935	8.14
Rv2291|sseB|Probable thiosulfate sulfurtransferase SseB|284 AA	90033000	188180000	95043000	31504000	498200000	22394000	30147000	195060000	133820000	71.678	145.451	67.773	97.809	1519.44	85.316	9.411	55.378	41.334
Rv0136|cyp138|Probable cytochrome P450 138 Cyp138|441 AA	14812000	42665000	0	0	112970000	46094000	80799000	0	92186000	11.792	32.977	0	0	344.543	175.608	25.222	0	28.474
Rv3271c|Rv3271c|Probable conserved integral membrane protein|222 AA	0	72626000	130680000	0	34087000	0	0	48165000	0	0	56.135	93.184	0	103.961	0	0	13.674	0
Rv3365c|Rv3365c|Conserved protein|876 AA	309650000	301420000	261870000	57250000	332110000	95857000	244770000	74492000	204230000	246.52	232.979	186.732	177.741	1012.89	365.193	76.407	21.148	63.082
Rv1767|Rv1767|Conserved protein|119 AA	35681000	54066000	38446000	0	0	22525000	0	0	29016000	28.407	41.79	27.415	0	0	85.815	0	0	8.962
Rv0953c|Rv0953c|Possible oxidoreductase|282 AA	79397000	44345000	54930000	18280000	40860000	0	92025000	0	12064000	63.21	34.276	39.169	56.753	124.617	0	28.726	0	3.726
Rv0245|Rv0245|Possible oxidoreductase|162 AA	0	22157000	0	65577000	40888000	62936000	50158000	92468000	42325000	0	17.126	0	203.593	124.703	239.772	15.657	26.252	13.073
Rv0778|cyp126|Possible cytochrome P450 126 Cyp126|414 AA	92976000	81130000	141020000	0	120650000	47983000	0	114720000	76627000	74.021	62.708	100.557	0	367.966	182.804	0	32.569	23.668
Rv1710|scpB|Possible segregation and condensation protein ScpB|231 AA	139200000	59187000	58000000	0	37781000	0	0	0	62427000	110.821	45.748	41.358	0	115.227	0	0	0	19.282
Rv3730c|Rv3730c|Conserved hypothetical protein|346 AA	0	0	31613000	37001000	13364000	0	35861000	22724000	0	0	0	22.542	114.875	40.758	0	11.194	6.451	0
Rv1288|Rv1288|Conserved protein|456 AA	76738000	74445000	109360000	232060000	331560000	82974000	168650000	383090000	180170000	61.093	57.541	77.982	720.463	1011.21	316.112	52.645	108.76	55.65
Rv0716|rplE|50S ribosomal protein L5 RplE|187 AA	846220000	750150000	349370000	1511600000	2096700000	1075500000	1299900000	1935600000	2366200000	673.697	579.819	249.126	4692.97	6394.65	4097.41	405.773	549.518	730.862
Rv0251c|hsp|Heat shock protein Hsp (heat-stress-induced ribosome-binding protein A)|159 AA	216450000	399750000	339440000	225390000	41085000	109750000	78551000	293100000	40913000	172.321	308.982	242.045	699.755	125.304	418.122	24.52	83.211	12.637
Rv0937c|mku|DNA end-binding protein	90674000	83016000	62283000	42119000	0	50603000	0	34824000	93280000	72.188	64.166	44.412	130.764	0	192.786	0	9.887	28.812
Rv0498|Rv0498|Conserved hypothetical protein|280 AA	0	0	22585000	0	28506000	0	54875000	0	0	0	0	16.105	0	86.939	0	17.13	0	0
Rv3835|Rv3835|Conserved membrane protein|449 AA	0	20131000	131430000	0	25121000	0	48677000	0	0	0	15.56	93.719	0	76.616	0	15.195	0	0
Rv1874|Rv1874|Unknown protein|228 AA	101400000	80909000	0	88650000	0	47369000	0	54180000	119920000	80.727	62.538	0	275.226	0	180.465	0	15.382	37.04
Rv3482c|Rv3482c|Probable conserved membrane protein|260 AA	58041000	32722000	0	50876000	122730000	87857000	158120000	142010000	47274000	46.208	25.292	0	157.952	374.31	334.715	49.358	40.317	14.602
Rv3207c|Rv3207c|Conserved protein|285 AA	0	45065000	0	72109000	186510000	50850000	159180000	110390000	94993000	0	34.832	0	223.872	568.83	193.727	49.689	31.34	29.341
Rv0450c|mmpL4|Probable conserved transmembrane transport protein MmpL4|967 AA	0	18638000	0	45630000	91533000	31244000	59560000	108340000	45289000	0	14.406	0	141.665	279.163	119.032	18.592	30.758	13.989
Rv3712|Rv3712|Possible ligase|413 AA	0	33119000	81935000	0	33213000	0	0	0	76917000	0	25.599	58.426	0	101.295	0	0	0	23.758
Rv2587c|secD|Probable protein-export membrane protein SecD|573 AA	104860000	803600000	603480000	550100000	105860000	309940000	200140000	503500000	185740000	83.482	621.132	430.325	1707.86	322.858	1180.8	62.475	142.944	57.371
Rv0473|Rv0473|Possible conserved transmembrane protein|456 AA	61879000	35713000	58153000	174020000	412190000	64609000	294180000	243030000	214720000	49.263	27.604	41.467	540.269	1257.12	246.145	91.83	68.996	66.322
Rv0901|Rv0901|Possible conserved exported or membrane protein|175 AA	67317000	108680000	0	121340000	0	59296000	112910000	0	130160000	53.593	84.003	0	376.717	0	225.904	35.246	0	40.203
Rv2176|pknL|Probable transmembrane serine/threonine-protein kinase L PknL (protein kinase L) (STPK L)|399 AA	13287000	50121000	0	0	17925000	0	0	43958000	0	10.578	38.74	0	0	54.669	0	0	12.48	0
Rv1927|Rv1927|Conserved hypothetical protein|257 AA	0	0	0	17708000	36701000	0	46526000	34331000	0	0	0	0	54.977	111.933	0	14.523	9.747	0
Rv2837c|Rv2837c|Conserved protein|336 AA	42182000	315910000	436570000	260250000	311320000	147770000	421800000	348100000	205650000	33.582	244.179	311.306	807.982	949.483	562.97	131.668	98.826	63.52
Rv2289|cdh|Probable CDP-diacylglycerol pyrophosphatase Cdh (CDP-diacylglycerol diphosphatase) (CDP-diacylglycerol phosphatidylhydrolase)|260 AA	392860000	73754000	274590000	443060000	149600000	218840000	88926000	508600000	458220000	312.766	57.007	195.803	1375.54	456.259	833.73	27.759	144.392	141.533
Rv1400c|lipI|Probable lipase LipH|320 AA	335040000	299090000	303920000	279980000	998650000	302800000	756600000	680060000	609230000	266.734	231.178	216.717	869.237	3045.74	1153.6	236.178	193.069	188.176
Rv2155c|murD|Probable UDP-N-acetylmuramoylalanine-D-glutamate ligase MurD|486 AA	136720000	441420000	0	51309000	73234000	97879000	74427000	104550000	103430000	108.846	341.19	0	159.296	223.354	372.897	23.233	29.682	31.947
Rv2694c|Rv2694c|Conserved protein|122 AA	434650000	96472000	437650000	69209000	310070000	160660000	112170000	204270000	460910000	346.036	74.567	312.076	214.869	945.671	612.078	35.015	57.992	142.364
Rv1462|Rv1462|Conserved hypothetical protein|397 AA	334020000	518950000	312380000	199100000	71814000	196390000	220240000	228980000	93900000	265.922	401.116	222.749	618.134	219.023	748.201	68.749	65.008	29.003
Rv3101c|ftsX|Putative cell division protein FtsX (septation component-transport integral membrane protein ABC transporter)|297 AA	304280000	97427000	0	0	44855000	0	0	0	133210000	242.245	75.305	0	0	136.802	0	0	0	41.145
Rv1003|Rv1003|Conserved protein|285 AA	98058000	57391000	69360000	49002000	95089000	51959000	82804000	102340000	83477000	78.066	44.36	49.459	152.134	290.008	197.952	25.848	29.054	25.784
Rv1060|Rv1060|Unknown protein|157 AA	63326000	89525000	57164000	203280000	193620000	185740000	363740000	259630000	198230000	50.415	69.197	40.762	631.111	590.514	707.627	113.544	73.709	61.228
Rv2584c|apt|Adenine phosphoribosyltransferase Apt (APRT) (AMP diphosphorylase) (AMP pyrophosphorylase) (transphosphoribosidase)|223 AA	319190000	372830000	301880000	154830000	219840000	153120000	173150000	292900000	279650000	254.115	288.174	215.262	480.691	670.482	583.352	54.05	83.155	86.377
Rv3169|Rv3169|Conserved protein|374 AA	355300000	995540000	642470000	503040000	461270000	335170000	806050000	435300000	635410000	282.863	769.49	458.128	1561.76	1406.81	1276.92	251.614	123.582	196.263
Rv2453c|mobA|Probable molybdopterin-guanine dinucleotide biosynthesis protein A MobA|201 AA	515350000	457730000	644950000	1622500000	98909000	1855600000	460810000	608030000	425550000	410.283	353.796	459.896	5037.28	301.659	7069.41	143.845	172.62	131.442
Rv2962c|Rv2962c|Possible glycosyl transferase|449 AA	177070000	126410000	149320000	118720000	73208000	195590000	214940000	141430000	118800000	140.97	97.707	106.476	368.583	223.274	745.153	67.095	40.152	36.694
Rv1383|carA|Probable carbamoyl-phosphate synthase small chain CarA (carbamoyl-phosphate synthetase glutamine chain)|376 AA	0	198290000	65441000	214570000	116240000	150660000	242980000	106980000	371480000	0	153.266	46.664	666.163	354.516	573.98	75.848	30.372	114.741
Rv3190A|Rv3190A|Conserved protein|69 AA	0	0	0	38962000	50333000	0	42896000	142250000	0	0	0	0	120.963	153.509	0	13.39	40.385	0
Rv0660c|mazE2|Possible antitoxin MazE2|81 AA	52609000	0	0	22827000	0	0	0	68038000	0	41.883	0	0	70.87	0	0	0	19.316	0
Rv3859c|gltB|Probable ferredoxin-dependent glutamate synthase [NADPH] (large subunit) GltB (L-glutamate synthase) (L-glutamate synthetase) (NADH-glutamate synthase) (glutamate synthase (NADH))(NADPH-GOGAT)|1527 AA	1061100000	1216000000	1628700000	578130000	927120000	631750000	702700000	1361000000	1027400000	844.768	939.891	1161.38	1794.88	2827.59	2406.82	219.353	386.389	317.339
Rv3602c|panC|Pantoate--beta-alanine ligase PanC (pantothenate synthetase) (pantoate activating enzyme)|309 AA	0	27269000	184900000	72079000	349640000	212800000	230920000	270660000	319120000	0	21.077	131.847	223.779	1066.35	810.719	72.083	76.841	98.568
Rv0188|Rv0188|Probable conserved transmembrane protein|143 AA	0	0	0	92477000	0	101530000	183380000	137910000	0	0	0	0	287.108	0	386.806	57.243	39.153	0
Rv2418c|octT|Unknown protein|247 AA	53834000	74628000	0	32058000	78675000	55258000	70762000	89994000	72396000	42.859	57.683	0	99.529	239.948	210.52	22.089	25.549	22.361
Rv2775|Rv2775|GCN5-related N-acetyltransferase|153 AA	76264000	0	79944000	36118000	80501000	0	0	109780000	89031000	60.716	0	57.006	112.133	245.517	0	0	31.167	27.5
Rv2714|Rv2714|Conserved alanine and leucine rich protein|324 AA	72617000	185690000	101380000	81816000	199080000	100140000	194000000	119430000	272340000	57.812	143.527	72.291	254.009	607.167	381.51	60.558	33.906	84.119
Rv2752c|Rv2752c|Conserved hypothetical protein|558 AA	60485000	37790000	34872000	106590000	193300000	228990000	157440000	320410000	277040000	48.154	29.209	24.866	330.924	589.538	872.399	49.146	90.965	85.571
Rv3212|Rv3212|Conserved alanine valine rich protein|407 AA	40844000	0	32723000	124070000	176210000	98406000	98132000	322490000	225220000	32.517	0	23.334	385.193	537.416	374.904	30.633	91.555	69.565
Rv1571|Rv1571|Conserved protein|169 AA	0	0	25017000	37314000	0	54031000	0	80055000	80435000	0	0	17.839	115.847	0	205.846	0	22.728	24.844
Rv1418|lprH|Probable lipoprotein LprH|228 AA	57942000	84047000	0	14026000	0	0	50087000	0	0	46.129	64.963	0	43.546	0	0	15.635	0	0
Rv2228c|Rv2228c|Multifunctional protein. Has RNASE H	237400000	432340000	201690000	129160000	243770000	39016000	155660000	178990000	213960000	189	334.172	143.82	400.995	743.465	148.642	48.59	50.815	66.087
Rv1179c|Rv1179c|Unknown protein|939 AA	139540000	409000000	75096000	207880000	20944000	114110000	148850000	48430000	152120000	111.091	316.131	53.549	645.393	63.876	434.733	46.465	13.749	46.986
Rv2376c|cfp2|Low molecular weight antigen CFP2 (low molecular weight protein antigen 2) (CFP-2)|168 AA	1845000000	1566800000	1200700000	586800000	659150000	612820000	1126500000	727210000	1014800000	1468.85	1211.04	856.186	1821.8	2010.32	2334.7	351.645	206.455	313.447
Rv1712|cmk|Cytidylate kinase Cmk (CMP kinase) (cytidine monophosphate kinase) (ck)|230 AA	34012000	23746000	38911000	68529000	84742000	25075000	35768000	108620000	152830000	27.078	18.354	27.746	212.758	258.451	95.53	11.165	30.837	47.205
Rv0491|regX3|Two component sensory transduction protein RegX3 (transcriptional regulatory protein) (probably LuxR-family)|227 AA	0	0	0	51057000	146900000	49133000	120290000	199930000	67567000	0	0	0	158.514	448.025	187.185	37.549	56.76	20.87
Rv3759c|proX|Possible osmoprotectant (glycine betaine/carnitine/choline/L-proline) binding lipoprotein ProX|315 AA	28070000	0	0	54918000	0	44393000	0	118920000	70858000	22.347	0	0	170.501	0	169.127	0	33.761	21.886
Rv3295|Rv3295|Probable transcriptional regulatory protein (probably TetR-family)|221 AA	498920000	345040000	334850000	111490000	493650000	421000000	554700000	510830000	352030000	397.203	266.694	238.772	346.136	1505.57	1603.91	173.153	145.025	108.734
Rv1529|fadD24|Probable fatty-acid-AMP ligase FadD24 (fatty-acid-AMP synthetase) (fatty-acid-AMP synthase)|584 AA	35069000	0	63552000	31255000	61927000	35127000	89942000	174930000	16810000	27.919	0	45.317	97.036	188.869	133.826	28.076	49.663	5.192
Rv3198A|Rv3198A|Possible glutaredoxin protein|84 AA	622700000	232130000	323570000	130550000	219150000	122480000	192260000	317010000	241000000	495.747	179.422	230.729	405.311	668.377	466.621	60.015	89.999	74.439
Rv1653|argJ|Probable glutamate N-acetyltransferase ArgJ|404 AA	177820000	0	96009000	92264000	167280000	99004000	96629000	372650000	165110000	141.567	0	68.461	286.446	510.181	377.183	30.163	105.796	50.998
Rv0208c|Rv0208c|Hypothetical methlytransferase (methylase)|263 AA	30603000	41362000	123600000	26272000	68301000	31817000	38513000	135950000	47448000	24.364	31.97	88.136	81.565	208.309	121.215	12.022	38.596	14.656
Rv2198c|mmpS3|Probable conserved membrane protein MmpS3|299 AA	210550000	273870000	574430000	70089000	211280000	391210000	159560000	367230000	347470000	167.624	211.684	409.61	217.601	644.375	1490.42	49.808	104.257	107.325
Rv0319|pcp|Probable pyrrolidone-carboxylate peptidase Pcp (5-oxoprolyl-peptidase) (pyroglutamyl-peptidase I) (PGP-I) (pyrase)|222 AA	0	0	0	0	35811000	50954000	88440000	96255000	0	0	0	0	0	109.219	194.123	27.607	27.327	0
Rv3684|Rv3684|Probable lyase|346 AA	112510000	343080000	489220000	145940000	652790000	109980000	316600000	755250000	303250000	89.572	265.179	348.849	453.091	1990.92	418.999	98.829	214.416	93.667
Rv0940c|Rv0940c|Possible oxidoreductase|288 AA	158860000	33306000	264400000	292430000	181980000	323550000	329170000	419120000	414170000	126.472	25.743	188.536	907.89	555.014	1232.65	102.753	118.988	127.927
Rv0044c|Rv0044c|Possible oxidoreductase|264 AA	397150000	931470000	823910000	166620000	488640000	288700000	407170000	520730000	604690000	316.181	719.968	587.507	517.295	1490.29	1099.88	127.101	147.836	186.774
Rv2173|idsA2|Probable geranylgeranyl pyrophosphate synthetase IdsA2 (ggppsase) (GGPP synthetase) (geranylgeranyl diphosphate synthase)|352 AA	0	0	0	51883000	35764000	57375000	76158000	158130000	33944000	0	0	0	161.078	109.075	218.586	23.773	44.893	10.484
Rv1142c|echA10|Probable enoyl-CoA hydratase EchA10 (enoyl hydrase) (unsaturated acyl-CoA hydratase) (crotonase)|268 AA	25933000	38245000	69303000	81069000	125880000	97887000	191960000	134510000	196700000	20.646	29.561	49.418	251.69	383.917	372.927	59.922	38.187	60.756
Rv0198c|zmp1|Probable zinc metalloprotease Zmp1|663 AA	464270000	271430000	401160000	850980000	1158500000	504070000	1315400000	1512100000	1568900000	369.617	209.798	286.056	2641.99	3533.26	1920.39	410.611	429.286	484.595
Rv1689|tyrS|Probable tyrosyl-tRNA synthase TyrS (TYRRS)|424 AA	387150000	489860000	479130000	207740000	275060000	78105000	194520000	396840000	373230000	308.22	378.631	341.654	644.958	838.895	297.562	60.721	112.663	115.282
Rv0119|fadD7|Probable fatty-acid-CoA ligase FadD7 (fatty-acid-CoA synthetase) (fatty-acid-CoA synthase)|525 AA	208420000	182280000	261180000	175260000	484070000	143240000	532510000	424910000	420940000	165.928	140.891	186.24	544.119	1476.35	545.712	166.227	120.632	130.018
Rv1898|Rv1898|Conserved hypothetical protein|102 AA	0	59277000	48166000	47366000	30085000	0	91094000	0	105290000	0	45.817	34.346	147.054	91.755	0	28.436	0	32.522
Rv0989c|grcC2|Probable polyprenyl-diphosphate synthase GrcC2 (polyprenyl pyrophosphate synthetase)|325 AA	474290000	0	70759000	57565000	149220000	92269000	162040000	294190000	103220000	377.594	0	50.456	178.719	455.1	351.524	50.582	83.521	31.882
Rv0062|celA1|Possible cellulase CelA1 (endoglucanase) (endo-1	14613000	0	77813000	39556000	155270000	38302000	104430000	114830000	156710000	11.634	0	55.486	122.807	473.552	145.922	32.599	32.6	48.404
Rv1533|Rv1533|Conserved protein|375 AA	241850000	125040000	42787000	200900000	73046000	112170000	145290000	244000000	206360000	192.543	96.648	30.51	623.722	222.78	427.342	45.353	69.272	63.74
Rv3423c|alr|Alanine racemase Alr|408 AA	105530000	0	0	39455000	53045000	33755000	27193000	121690000	123190000	84.015	0	0	122.494	161.78	128.599	8.488	34.548	38.05
Rv3232c|ppk2|Polyphosphate kinase Ppk2 (polyphosphoric acid kinase)|295 AA	173620000	191390000	302700000	82093000	284170000	43596000	390620000	137900000	188940000	138.223	147.932	215.847	254.869	866.679	166.091	121.935	39.15	58.359
Rv3438|Rv3438|Conserved protein|280 AA	314770000	287560000	196190000	216160000	173750000	209080000	368710000	282310000	422380000	250.596	222.266	139.898	671.099	529.914	796.547	115.095	80.148	130.463
Rv0187|Rv0187|Probable O-methyltransferase|220 AA	445770000	109540000	476120000	17648000	49318000	94276000	40345000	71902000	165450000	354.889	84.668	339.508	54.791	150.413	359.17	12.594	20.413	51.103
Rv3803c|fbpD|Secreted MPT51/MPB51 antigen protein FbpD (MPT51/MPB51 antigen 85 complex C) (AG58C) (mycolyl transferase 85C) (fibronectin-binding protein C) (85C)|299 AA	1020500000	1267000000	692620000	96633000	215870000	54626000	166780000	239120000	248750000	812.446	979.311	493.888	300.011	658.374	208.113	52.062	67.886	76.833
Rv1711|Rv1711|Conserved hypothetical protein|254 AA	109330000	41687000	51544000	91908000	204000000	92980000	198870000	300030000	231320000	87.04	32.221	36.755	285.341	622.172	354.232	62.079	85.179	71.449
Rv2206|Rv2206|Probable conserved transmembrane protein|236 AA	116040000	75518000	243110000	304000000	49135000	51556000	81583000	138620000	376190000	92.382	58.371	173.355	943.81	149.855	196.417	25.467	39.354	116.196
Rv2502c|accD1|Probable acetyl-/propionyl-CoA carboxylase (beta subunit) AccD1|529 AA	32061000	39582000	29724000	135350000	293450000	85947000	256240000	567200000	199170000	25.525	30.594	21.195	420.213	894.982	327.438	79.987	161.028	61.519
Rv3332|nagA|Probable N-acetylglucosamine-6-phosphate deacetylase NagA (GlcNAc 6-P deacetylase)|383 AA	244480000	123650000	576830000	219170000	172050000	71456000	296170000	300540000	234190000	194.637	95.574	411.321	680.444	524.729	272.231	92.452	85.324	72.336
Rv2582|ppiB|Probable peptidyl-prolyl cis-trans isomerase B PpiB (cyclophilin) (PPIase) (rotamase) (peptidylprolyl isomerase)|308 AA	400120000	483040000	415410000	479940000	201650000	303750000	187540000	871170000	774010000	318.546	373.359	296.217	1490.04	615.005	1157.22	58.542	247.326	239.073
Rv2916c|ffh|Probable signal recognition particle protein Ffh (fifty-four homolog) (SRP protein)|525 AA	1217400000	1757700000	1884800000	613410000	824650000	513270000	899490000	1484000000	1370900000	969.203	1358.59	1344	1904.42	2515.07	1955.44	280.782	421.309	423.438
Rv3825c|pks2|Polyketide synthase Pks2|2126 AA	1823100000	1834400000	1477900000	197420000	1728000000	830450000	1584400000	1205800000	2152300000	1451.42	1417.88	1053.85	612.918	5270.16	3163.82	494.581	342.327	664.793
Rv0528|Rv0528|Probable conserved transmembrane protein|529 AA	0	0	37761000	50364000	18044000	44709000	50288000	216240000	19611000	0	0	26.926	156.362	55.032	170.331	15.698	61.391	6.057
Rv1443c|Rv1443c|Unknown protein|161 AA	164870000	124030000	108480000	56388000	215870000	81995000	266610000	169730000	223670000	131.257	95.867	77.354	175.064	658.374	312.382	83.224	48.186	69.086
Rv3459c|rpsK|30S ribosomal protein S11 RpsK|139 AA	151540000	136050000	266710000	863640000	1158500000	620220000	1143500000	2121800000	1967000000	120.645	105.158	190.183	2681.29	3533.26	2362.9	356.951	602.38	607.559
Rv1833c|Rv1833c|Possible haloalkane dehalogenase|286 AA	43667000	58070000	219210000	128350000	219880000	37845000	132580000	298570000	273420000	34.764	44.884	156.313	398.481	670.604	144.181	41.386	84.764	84.453
Rv3364c|Rv3364c|Conserved protein|130 AA	54840000	27458000	27810000	11291000	0	19260000	0	47741000	34922000	43.66	21.223	19.831	35.054	0	73.376	0	13.554	10.787
Rv0408|pta|Probable phosphate acetyltransferase Pta (phosphotransacetylase)|690 AA	116450000	50086000	94785000	65222000	39300000	39753000	31164000	116810000	190340000	92.709	38.713	67.589	202.491	119.86	151.45	9.728	33.162	58.791
Rv2175c|Rv2175c|Conserved regulatory protein|146 AA	275320000	448400000	56990000	58874000	129410000	58032000	143130000	216700000	131510000	219.189	346.585	40.638	182.783	394.683	221.089	44.679	61.521	40.62
Rv0669c|Rv0669c|Possible hydrolase|637 AA	230180000	33556000	536770000	170200000	238460000	122440000	365030000	318590000	398010000	183.252	25.937	382.756	528.41	727.27	466.468	113.947	90.448	122.936
Rv1464|csd|Probable cysteine desulfurase Csd|417 AA	540740000	560910000	554000000	184260000	254440000	192020000	355670000	437800000	475520000	430.497	433.548	395.042	572.061	776.007	731.552	111.025	124.292	146.877
Rv0158|Rv0158|Probable transcriptional regulatory protein (possibly TetR-family)|214 AA	0	262550000	123010000	49883000	218310000	117650000	180370000	322550000	212990000	0	202.935	87.715	154.869	665.815	448.22	56.304	91.572	65.787
Rv2861c|mapB|Methionine aminopeptidase MapB (map) (peptidase M)|285 AA	585210000	1033900000	314990000	532510000	660510000	401180000	1523500000	857850000	1100700000	465.9	799.14	224.611	1653.25	2014.46	1528.4	475.571	243.544	339.98
Rv2504c|scoA|Probable succinyl-CoA:3-ketoacid-coenzyme A transferase (alpha subunit) ScoA (3-oxo acid:CoA transferase) (OXCT A) (succinyl-CoA:3-oxoacid-coenzyme A transferase)|248 AA	63010000	122630000	33556000	264760000	142530000	46684000	134270000	329450000	352700000	50.164	94.785	23.928	821.984	434.697	177.855	41.913	93.531	108.94
Rv0994|moeA1|Probable molybdopterin biosynthesis protein MoeA1|426 AA	140400000	182480000	322040000	340720000	311450000	216230000	478090000	484380000	897040000	111.776	141.046	229.638	1057.81	949.88	823.787	149.239	137.516	277.074
Rv0392c|ndhA|Probable membrane NADH dehydrogenase NdhA|470 AA	447750000	361050000	526530000	116710000	85478000	143280000	412060000	140910000	202860000	356.465	279.069	375.454	362.343	260.696	545.864	128.627	40.004	62.659
Rv2955c|Rv2955c|Conserved protein|321 AA	27513000	131990000	48833000	67861000	66476000	197040000	186210000	140690000	248130000	21.904	102.02	34.821	210.684	202.743	750.677	58.127	39.942	76.641
Rv3463|Rv3463|Conserved protein|285 AA	587740000	1134600000	388590000	378870000	671490000	469530000	614760000	1441900000	1203700000	467.915	876.974	277.093	1176.26	2047.95	1788.8	191.902	409.356	371.794
Rv3680|Rv3680|Probable anion transporter ATPase|386 AA	411540000	789950000	736040000	297650000	325640000	173420000	541280000	608910000	517010000	327.637	610.582	524.85	924.096	993.157	660.69	168.964	172.87	159.692
Rv1780|Rv1780|Conserved protein|187 AA	30898000	100960000	43266000	264760000	416760000	133320000	385280000	766170000	567730000	24.599	78.036	30.852	821.984	1271.06	507.919	120.268	217.516	175.358
Rv3691|Rv3691|Conserved protein|333 AA	0	0	42952000	28273000	46324000	45783000	61632000	90596000	101860000	0	0	30.628	87.777	141.282	174.423	19.239	25.72	31.462
Rv2250A|Rv2250A|Possible flavoprotein|139 AA	0	32391000	109970000	0	18856000	0	0	0	210440000	0	25.036	78.417	0	57.508	0	0	0	65
Rv1901|cinA|Probable CinA-like protein CinA|430 AA	352930000	508760000	826680000	208340000	353600000	228990000	525910000	615240000	562350000	280.976	393.239	589.483	646.821	1078.43	872.399	164.166	174.667	173.696
Rv1652|argC|Probable N-acetyl-gamma-glutamyl-phoshate reductase ArgC|352 AA	191430000	184090000	113920000	150560000	244060000	263330000	549940000	336760000	543040000	152.402	142.29	81.233	467.435	744.349	1003.23	171.668	95.606	167.732
Rv1319c|Rv1319c|Possible adenylate cyclase (ATP pyrophosphate-lyase) (adenylyl cyclase)|535 AA	0	0	0	0	11410000	7443400	37416000	24849000	0	0	0	0	0	34.799	28.358	11.68	7.055	0
Rv1880c|cyp140|Probable cytochrome P450 140 Cyp140|438 AA	33117000	30392000	248130000	80516000	362010000	96220000	243880000	469470000	346000000	26.365	23.491	176.935	249.973	1104.08	366.576	76.129	133.283	106.871
Rv2402|Rv2402|Conserved protein|642 AA	154130000	170440000	324480000	149890000	150780000	173520000	236440000	314570000	498160000	122.707	131.739	231.378	465.354	459.858	661.071	73.806	89.307	153.87
Rv2151c|ftsQ|Possible cell division protein FtsQ|314 AA	207750000	165600000	256010000	200830000	180540000	35340000	177540000	271420000	357430000	165.395	127.998	182.554	623.505	550.622	134.637	55.42	77.056	110.401
Rv0830|Rv0830|Possible S-adenosylmethionine-dependent methyltransferase|301 AA	0	0	0	60698000	75517000	21944000	81120000	131210000	118120000	0	0	0	188.445	230.316	83.602	25.322	37.251	36.484
Rv2112c|dop|Deamidase of pup Dop|554 AA	236470000	553990000	209800000	369440000	660570000	328560000	741760000	1265800000	1032400000	188.26	428.199	149.603	1146.98	2014.65	1251.74	231.546	359.361	318.883
Rv1627c|Rv1627c|Probable nonspecific lipid-transfer protein|402 AA	786040000	728150000	656690000	365910000	299000000	136030000	343060000	649440000	741680000	625.786	562.814	468.267	1136.02	911.909	518.243	107.089	184.376	229.087
Rv1069c|Rv1069c|Conserved protein|587 AA	136980000	63656000	0	148770000	109890000	19992000	149230000	157610000	193110000	109.053	49.202	0	461.877	335.149	76.165	46.583	44.746	59.647
Rv2455c|Rv2455c|Probable oxidoreductase (alpha subunit)|653 AA	1217300000	2320600000	2381200000	877160000	1632100000	946510000	3192500000	2272100000	3761100000	969.123	1793.68	1697.97	2723.27	4977.68	3605.99	996.561	645.051	1161.71
Rv2531c|Rv2531c|Probable amino acid decarboxylase|947 AA	156690000	137340000	233470000	81818000	260730000	196220000	304890000	434510000	416930000	124.745	106.155	166.481	254.015	795.191	747.553	95.174	123.358	128.78
Rv0464c|Rv0464c|Conserved protein|190 AA	33253000	184200000	67760000	105990000	311730000	81898000	245410000	338660000	543670000	26.474	142.375	48.318	329.061	950.734	312.013	76.606	96.146	167.926
Rv3034c|Rv3034c|Possible transferase|300 AA	36833000	54929000	0	92301000	25512000	37018000	94492000	126680000	72064000	29.324	42.457	0	286.561	77.808	141.03	29.496	35.965	22.259
Rv3696c|glpK|Probable glycerol kinase GlpK (ATP:glycerol 3-phosphotransferase) (glycerokinase) (GK)|517 AA	63967000	77719000	72102000	38863000	199500000	45449000	207560000	213440000	139370000	50.926	60.072	51.414	120.656	608.448	173.15	64.791	60.596	43.048
Rv1692|Rv1692|Probable phosphatase|353 AA	83600000	247880000	161480000	27501000	181920000	46024000	516540000	91023000	98121000	66.556	191.596	115.147	85.381	554.831	175.341	161.242	25.841	30.307
Rv1058|fadD14|Probable medium chain fatty-acid-CoA ligase FadD14 (fatty-acid-CoA synthetase) (fatty-acid-CoA synthase)|543 AA	527050000	273490000	150000000	469350000	297540000	213510000	661190000	915360000	560000000	419.598	211.391	106.961	1457.16	907.456	813.424	206.395	259.871	172.97
Rv1613|trpA|Probable tryptophan synthase	587910000	549800000	783030000	399510000	881580000	883980000	2288700000	1539500000	1289800000	468.05	424.961	558.357	1240.34	2688.7	3367.76	714.434	437.065	398.388
Rv0077c|Rv0077c|Probable oxidoreductase|276 AA	392440000	139520000	299420000	442260000	53286000	466350000	347530000	403020000	447640000	312.431	107.84	213.508	1373.06	162.515	1776.69	108.484	114.418	138.265
Rv0780|purC|Phosphoribosylaminoimidazole- succinocarboxamide synthase PurC (SAICAR synthetase)|297 AA	895440000	890970000	1667500000	255500000	372170000	6438000000	1164700000	1636800000	1091400000	712.882	688.664	1189.05	793.235	1135.07	24527.3	363.569	464.689	337.107
Rv3767c|Rv3767c|Possible S-adenosylmethionine-dependent methyltransferase|314 AA	276830000	348760000	360780000	105220000	123590000	23951000	196660000	186510000	152540000	220.391	269.57	257.262	326.67	376.932	91.248	61.389	52.95	47.116
Rv1614|lgt|Possible prolipoprotein diacylglyceryl transferases Lgt|468 AA	72175000	384350000	282630000	208420000	137280000	300710000	440700000	459850000	440680000	57.46	297.078	201.536	647.069	418.685	1145.64	137.568	130.552	136.115
Rv1021|Rv1021|Conserved protein|325 AA	276640000	809910000	152570000	198460000	254680000	200390000	457520000	460570000	724870000	220.24	626.009	108.793	616.147	776.739	763.44	142.818	130.756	223.895
Rv1695|ppnK|Inorganic polyphosphate/ATP-NAD kinase PpnK (poly(P)/ATP NAD kinase)|307 AA	92012000	112030000	135470000	56157000	138450000	80350000	512850000	187790000	116790000	73.253	86.592	96.6	174.347	422.253	306.115	160.09	53.314	36.074
Rv3778c|Rv3778c|Possible aminotransferase|398 AA	928560000	666710000	765960000	470610000	186410000	354200000	836780000	475910000	841850000	739.25	515.325	546.185	1461.08	568.525	1349.42	261.207	135.111	260.027
Rv2713|sthA|Probable soluble pyridine nucleotide transhydrogenase SthA (STH) (NAD(P)(+) transhydrogenase [B-specific]) (nicotinamide nucleotide transhydrogenase)|468 AA	165550000	33293000	79017000	41610000	95795000	49490000	112440000	164890000	179790000	131.799	25.733	56.345	129.184	292.162	188.546	35.099	46.812	55.533
Rv1283c|oppB|Probable oligopeptide-transport integral membrane protein ABC transporter OppB|325 AA	0	84698000	0	0	58101000	8076100	142610000	54480000	0	0	65.466	0	0	177.2	30.768	44.517	15.467	0
Rv0001|dnaA|Chromosomal replication initiator protein DnaA|507 AA	166090000	128300000	391410000	159260000	202600000	167250000	331530000	411430000	601770000	132.228	99.168	279.104	494.445	617.902	637.184	103.489	116.805	185.872
Rv1823|Rv1823|Conserved protein|307 AA	0	0	92001000	24833000	34947000	18456000	32295000	94262000	83505000	0	0	65.603	77.098	106.584	70.313	10.081	26.761	25.793
Rv2841c|nusA|Probable N utilization substance protein A NusA|347 AA	224290000	455460000	470480000	248440000	513120000	198050000	595010000	753070000	1117700000	178.563	352.042	335.486	771.317	1564.94	754.525	185.737	213.797	345.23
Rv2067c|Rv2067c|Conserved protein|407 AA	65256000	150660000	51699000	185360000	216560000	98653000	442510000	430480000	372940000	51.952	116.451	36.865	575.476	660.478	375.845	138.133	122.214	115.192
Rv3546|fadA5|Probable acetyl-CoA acetyltransferase FadA5 (acetoacetyl-CoA thiolase)|391 AA	45247000	71375000	176780000	186590000	83986000	57279000	177470000	202470000	382710000	36.022	55.168	126.057	579.295	256.146	218.22	55.398	57.481	118.21
Rv1713|engA|Probable GTP-binding protein EngA|463 AA	43428000	0	49329000	16860000	28120000	7644000	17339000	53795000	71604000	34.574	0	35.175	52.344	85.762	29.122	5.412	15.272	22.117
Rv2224c|caeA|Probable carboxylesterase CaeA|520 AA	540120000	451000000	1268800000	190940000	415720000	294790000	478580000	831650000	1003300000	430.003	348.595	904.746	592.8	1267.89	1123.08	149.392	236.106	309.895
Rv2895c|viuB|Possible mycobactin utilization protein ViuB|283 AA	144500000	160640000	92310000	454010000	298960000	272210000	631930000	967620000	815100000	115.04	124.165	65.824	1409.54	911.787	1037.06	197.261	274.708	251.765
Rv1782|eccB5|ESX conserved component EccB5. ESX-5 type VII secretion system protein. Probable membrane protein.|506 AA	712590000	437060000	825540000	302850000	342030000	259810000	648480000	807290000	845170000	567.311	337.82	588.67	940.24	1043.14	989.817	202.428	229.19	261.053
Rv2129c|Rv2129c|Probable oxidoreductase|293 AA	580230000	416480000	374450000	154320000	200280000	151590000	304040000	464650000	555170000	461.936	321.913	267.01	479.108	610.826	577.523	94.908	131.914	171.479
Rv1679|fadE16|Possible acyl-CoA dehydrogenase FadE16|373 AA	230010000	294840000	121330000	68611000	125300000	127060000	434010000	164040000	287830000	183.117	227.893	86.517	213.012	382.148	484.069	135.479	46.571	88.904
Rv3732|Rv3732|Conserved protein|352 AA	303850000	232050000	277830000	94107000	294070000	174010000	564930000	424370000	419990000	241.903	179.36	198.113	292.168	896.873	662.938	176.347	120.479	129.725
Rv1812c|Rv1812c|Probable dehydrogenase|400 AA	57168000	18337000	0	15911000	32161000	12890000	32802000	36140000	115920000	45.513	14.173	0	49.398	98.087	49.108	10.239	10.26	35.805
Rv2715|Rv2715|Possible hydrolase|341 AA	170240000	107480000	261500000	38556000	190900000	42997000	84234000	370070000	227880000	135.532	83.075	186.468	119.702	582.219	163.809	26.294	105.063	70.387
Rv2391|sirA|Ferredoxin-dependent sulfite reductase SirA|563 AA	2530300000	2277700000	1961900000	936750000	1113900000	622050000	2084300000	2587600000	2222200000	2014.44	1760.52	1398.98	2908.27	3397.24	2369.87	650.629	734.621	686.384
Rv0526|Rv0526|Possible thioredoxin protein (thiol-disulfide interchange protein)|216 AA	115540000	59548000	73601000	218860000	38251000	67262000	148570000	268520000	184960000	91.984	46.027	52.483	679.481	116.66	256.253	46.377	76.233	57.13
Rv3667|acs|Acetyl-coenzyme A synthetase Acs (acetate--CoA ligase) (acetyl-CoA synthetase) (acetyl-CoA synthase) (acyl-activating enzyme) (acetate thiokinase) (acetyl-activating enzyme) (acetate--coenzyme A ligase) (acetyl-coenzyme A synthase)|651 AA	467530000	330290000	400700000	403070000	431370000	458910000	1243100000	988140000	1134600000	372.212	255.293	285.728	1251.39	1315.62	1748.34	388.042	280.534	350.45
Rv2465c|rpiB|Ribose-5-phosphate isomerase|162 AA	441760000	498000000	36240000	467760000	356540000	321580000	612850000	1052500000	1306900000	351.696	384.923	25.842	1452.23	1087.4	1225.15	191.305	298.805	403.67
Rv0512|hemB|Probable delta-aminolevulinic acid dehydratase HemB (porphobilinogen synthase) (ALAD) (ALADH)|329 AA	182090000	184520000	21650000	163710000	145140000	94718000	355400000	360460000	342140000	144.966	142.622	15.438	508.261	442.657	360.854	110.941	102.335	105.679
Rv2314c|Rv2314c|Conserved protein|457 AA	432660000	377490000	449760000	145760000	307540000	155420000	242380000	798330000	722650000	344.452	291.776	320.711	452.532	937.955	592.115	75.661	226.646	223.209
Rv3682|ponA2|Probable bifunctional membrane-associated penicillin-binding protein 1A/1B PonA2 (murein polymerase) [includes: penicillin-insensitive transglycosylase (peptidoglycan TGASE) + penicillin-sensitive transpeptidase (DD-transpeptidase)]|810 AA	380310000	284080000	350020000	380750000	226950000	398850000	680520000	895790000	749260000	302.774	219.576	249.59	1182.09	692.166	1519.53	212.429	254.315	231.428
Rv1598c|Rv1598c|Conserved protein|136 AA	121070000	123730000	208810000	139110000	365040000	105800000	553180000	484310000	542220000	96.387	95.635	148.897	431.886	1113.32	403.074	172.679	137.496	167.479
Rv3012c|gatC|Probable glutamyl-tRNA(GLN) amidotransferase (subunit C) GatC (Glu-ADT subunit C)|99 AA	115290000	398340000	92548000	81250000	0	60611000	562200000	156730000	0	91.785	307.892	65.993	252.252	0	230.914	175.495	44.496	0
Rv2298|Rv2298|Conserved protein|323 AA	1363800000	1525000000	1247400000	642200000	1569200000	484870000	3791800000	2070900000	3215500000	1085.76	1178.73	889.486	1993.8	4785.84	1847.24	1183.64	587.93	993.19
Rv1427c|fadD12|Possible long-chain-fatty-acid--CoA ligase FadD12 (fatty-acid-CoA synthetase) (fatty-acid-CoA synthase)|535 AA	49888000	77387000	76670000	86225000	56085000	101890000	166610000	191360000	251490000	39.717	59.815	54.671	267.698	171.052	388.178	52.008	54.327	77.679
Rv0533c|fabH|3-oxoacyl-[acyl-carrier-protein] synthase III FabH (beta-ketoacyl-ACP synthase III) (KAS III)|335 AA	48089000	133230000	56897000	116490000	81252000	164560000	379010000	232910000	293920000	38.285	102.978	40.572	361.659	247.807	626.936	118.311	66.123	90.785
Rv1992c|ctpG|Probable metal cation transporter P-type ATPase G CtpG|771 AA	25468000	0	0	31055000	44260000	24310000	58286000	121280000	98946000	20.276	0	0	96.415	134.987	92.616	18.194	34.431	30.562
Rv0819|mshD|GCN5-related N-acetyltransferase	238820000	598350000	91015000	112260000	74125000	90797000	79707000	386570000	392210000	190.131	462.487	64.9	348.527	226.071	345.916	24.881	109.747	121.144
Rv1558|Rv1558|Conserved protein|148 AA	1691900000	1720100000	3088100000	555420000	573770000	528320000	1027000000	1517000000	1904500000	1346.96	1329.53	2202.04	1724.38	1749.92	2012.78	320.585	430.677	588.254
Rv1429|Rv1429|Conserved protein|422 AA	42762000	29719000	28585000	31673000	135310000	34790000	148150000	188640000	145500000	34.044	22.971	20.383	98.333	412.677	132.542	46.246	53.555	44.941
Rv0291|mycP3|Probable membrane-anchored mycosin MycP3 (serine protease) (subtilisin-like protease) (subtilase-like) (mycosin-3)|461 AA	98046000	0	418780000	50916000	44564000	31268000	206720000	114640000	65150000	78.057	0	298.62	158.076	135.914	119.124	64.529	32.546	20.123
Rv0437c|psd|Possible phosphatidylserine decarboxylase Psd (PS decarboxylase)|231 AA	154300000	34808000	0	57953000	173200000	58673000	292940000	200430000	281990000	122.842	26.904	0	179.923	528.236	223.531	91.443	56.902	87.1
Rv0018c|pstP|Phosphoserine/threonine phosphatase PstP|514 AA	179230000	463540000	458450000	118810000	264390000	112090000	454230000	358480000	585420000	142.69	358.287	326.908	368.862	806.353	427.037	141.791	101.773	180.822
Rv0180c|Rv0180c|Probable conserved transmembrane protein|452 AA	336810000	215250000	663460000	143200000	422420000	347550000	676810000	828260000	884660000	268.143	166.375	473.095	444.584	1288.32	1324.09	211.271	235.144	273.25
Rv1360|Rv1360|Probable oxidoreductase|340 AA	66542000	31277000	57423000	75819000	105890000	39790000	157780000	248650000	207190000	52.976	24.175	40.947	235.391	322.95	151.591	49.252	70.592	63.996
Rv1267c|embR|Probable transcriptional regulatory protein EmbR|388 AA	133180000	524430000	847790000	88381000	417920000	142980000	392250000	538930000	787780000	106.028	405.351	604.535	274.391	1274.6	544.721	122.444	153.003	243.326
Rv2178c|aroG|3-deoxy-D-arabino-heptulosonate 7-phosphate synthase AroG (DAHP synthetase	918080000	1195500000	1135500000	988840000	1081800000	966470000	2181500000	3036500000	2812400000	730.907	924.046	809.694	3069.99	3299.34	3682.03	680.97	862.064	868.682
Rv1121|zwf1|Probable glucose-6-phosphate 1-dehydrogenase Zwf1 (G6PD)|466 AA	87092000	0	79377000	54819000	170430000	45856000	117760000	285370000	370930000	69.336	0	56.602	170.193	519.788	174.701	36.76	81.017	114.571
Rv2888c|amiC|Probable amidase AmiC (aminohydrolase)|473 AA	459620000	633090000	643180000	267000000	523410000	451070000	857350000	1276600000	1324000000	365.915	489.339	458.634	828.939	1596.33	1718.47	267.628	362.428	408.952
Rv3790|dprE1|Decaprenylphosphoryl-beta-D-ribose 2-oxidase|461 AA	212270000	310420000	206080000	116340000	172390000	171430000	454530000	403870000	439430000	168.993	239.935	146.95	361.194	525.766	653.109	141.885	114.659	135.729
Rv3102c|ftsE|Putative cell division ATP-binding protein FtsE (septation component-transport ATP-binding protein ABC transporter)|229 AA	955660000	343900000	598510000	489520000	550900000	228800000	1010100000	1230500000	1366400000	760.825	265.813	426.781	1519.78	1680.17	871.676	315.31	349.34	422.048
Rv3651|Rv3651|Conserved hypothetical protein|345 AA	277470000	252020000	360990000	382220000	518020000	355350000	1153700000	1205300000	1302700000	220.901	194.796	257.412	1186.65	1579.89	1353.8	360.135	342.185	402.372
Rv1904|Rv1904|Conserved hypothetical protein|143 AA	114580000	195540000	54989000	18569000	7136000	0	0	51809000	66608000	91.22	151.14	39.211	57.65	21.764	0	0	14.709	20.574
Rv2870c|dxr|Probable 1-deoxy-D-xylulose 5-phosphate reductoisomerase Dxr (DXP reductoisomerase) (1-deoxyxylulose-5-phosphate reductoisomerase)|413 AA	0	136220000	56666000	20849000	98974000	30297000	104830000	134110000	142990000	0	105.289	40.407	64.729	301.857	115.425	32.723	38.074	44.166
Rv1829|Rv1829|Conserved protein|164 AA	581620000	340480000	460200000	235610000	143550000	208060000	524320000	548130000	492660000	463.042	263.17	328.156	731.484	437.808	792.661	163.67	155.614	152.171
Rv3401|Rv3401|Conserved protein|786 AA	838440000	1114600000	801070000	849680000	626840000	400300000	1529800000	1934000000	1645200000	667.503	861.516	571.221	2637.95	1911.78	1525.05	477.538	549.064	508.162
Rv0799c|Rv0799c|Conserved protein|335 AA	0	0	79217000	127520000	168910000	35706000	397520000	295210000	222670000	0	0	56.487	395.904	515.152	136.032	124.089	83.81	68.777
Rv2528c|mrr|Probable restriction system protein Mrr|306 AA	140310000	292430000	196710000	111290000	222690000	135870000	269910000	569860000	590760000	111.704	226.03	140.268	345.515	679.174	517.634	84.254	161.784	182.471
Rv2498c|citE|Probable citrate (pro-3S)-lyase (beta subunit) CitE (citrase) (citratase) (citritase) (citridesmolase) (citrase aldolase)|273 AA	272510000	366180000	253470000	323680000	219600000	59912000	503170000	641010000	395990000	216.952	283.034	180.742	1004.91	669.75	228.251	157.068	181.983	122.312
Rv3677c|Rv3677c|Possible hydrolase|264 AA	0	0	0	0	47990000	13333000	0	82653000	211430000	0	0	0	0	146.363	50.796	0	23.465	65.306
Rv2859c|Rv2859c|Possible amidotransferase|308 AA	0	36032000	29709000	131790000	18850000	20462000	16533000	142720000	427970000	0	27.85	21.185	409.16	57.49	77.956	5.161	40.518	132.19
Rv2121c|hisG|ATP phosphoribosyltransferase HisG|284 AA	393520000	298790000	314710000	185440000	146970000	103050000	309530000	510190000	453290000	313.291	230.946	224.411	575.724	448.238	392.597	96.622	144.843	140.01
Rv3781|rfbE|Probable O-antigen/lipopolysaccharide transport ATP-binding protein ABC transporter RfbE|273 AA	0	0	0	53696000	60125000	119440000	130220000	229430000	289170000	0	0	0	166.707	183.373	455.039	40.649	65.135	89.318
Rv0501|galE2|Possible UDP-glucose 4-epimerase GalE2 (galactowaldenase) (UDP-galactose 4-epimerase) (uridine diphosphate galactose 4-epimerase) (uridine diphospho-galactose 4-epimerase)|376 AA	0	49910000	72569000	22422000	32886000	20686000	28299000	214230000	64920000	0	38.577	51.747	69.612	100.298	78.809	8.834	60.82	20.052
Rv3723|Rv3723|Probable conserved transmembrane protein|254 AA	409170000	249560000	222650000	160940000	278020000	93808000	567070000	498240000	534700000	325.751	192.894	158.766	499.661	847.923	357.387	177.015	141.451	165.156
Rv3570c|hsaA|Possible oxidoreductase. Possible 3-hydroxy-9	381450000	380370000	551010000	222850000	108240000	123430000	212600000	516030000	621000000	303.682	294.002	392.91	691.869	330.117	470.24	66.365	146.501	191.812
Rv3708c|asd|Aspartate-semialdehyde dehydrogenase Asd (ASA dehydrogenase) (ASADH) (aspartic semialdehyde dehydrogenase) (L-aspartate-beta-semialdehyde dehydrogenase)|345 AA	538450000	727320000	242590000	478290000	394730000	280820000	1307600000	1398400000	787230000	428.674	562.173	172.984	1484.92	1203.87	1069.86	408.176	397.007	243.156
Rv0144|Rv0144|Probable transcriptional regulatory protein (possibly TetR-family)|280 AA	317960000	147560000	295290000	57710000	303840000	124030000	435660000	500080000	390830000	253.136	114.055	210.563	179.169	926.67	472.526	135.994	141.973	120.718
Rv3292|Rv3292|Conserved hypothetical protein|415 AA	171240000	251810000	155930000	440910000	489530000	118730000	1048100000	1102800000	883550000	136.328	194.633	111.189	1368.87	1493	452.334	327.172	313.086	272.907
Rv2416c|eis|Enhanced intracellular survival protein Eis	435460000	242980000	238790000	180000000	442660000	96142000	824040000	864260000	464640000	346.681	187.808	170.275	558.835	1350.05	366.279	257.23	245.364	143.516
Rv2501c|accA1|Probable acetyl-/propionyl-coenzyme A carboxylase alpha chain (alpha subunit) AccA1: biotin carboxylase + biotin carboxyl carrier protein (BCCP)|654 AA	17500000	16701000	120930000	91874000	172360000	122720000	352820000	362890000	498360000	13.932	12.909	86.232	285.236	525.674	467.535	110.135	103.025	153.931
Rv3306c|amiB1|Probable amidohydrolase AmiB1 (aminohydrolase)|394 AA	82689000	69926000	345110000	33728000	102410000	40006000	204030000	121010000	222320000	65.831	54.048	246.088	104.713	312.336	152.414	63.689	34.355	68.669
Rv1270c|lprA|Possible lipoprotein LprA|244 AA	411040000	591830000	536550000	241960000	501030000	272530000	745710000	1023000000	1588100000	327.239	457.447	382.599	751.199	1528.07	1038.28	232.779	290.43	490.526
Rv0048c|Rv0048c|Possible membrane protein|289 AA	196650000	103610000	372250000	127460000	172060000	113470000	425030000	498030000	385510000	156.558	80.084	265.441	395.717	524.759	432.295	132.676	141.391	119.075
Rv2216|Rv2216|Conserved protein|301 AA	415650000	747700000	684750000	60530000	192470000	29544000	168970000	311510000	288740000	330.909	577.925	488.276	187.924	587.007	112.556	52.745	88.438	89.185
Rv0645c|mmaA1|Methoxy mycolic acid synthase 1 MmaA1 (methyl mycolic acid synthase 1) (MMA1) (hydroxy mycolic acid synthase)|286 AA	639250000	472460000	318170000	296780000	195180000	61056000	545100000	562250000	417480000	508.923	365.182	226.878	921.395	595.272	232.609	170.157	159.623	128.949
Rv3090|Rv3090|Unknown alanine and valine rich protein|295 AA	259440000	734530000	0	212570000	43755000	191210000	236420000	472540000	291510000	206.547	567.745	0	659.953	133.447	728.466	73.8	134.154	90.04
Rv2860c|glnA4|Probable glutamine synthetase GlnA4 (glutamine synthase) (GS-II)|457 AA	152790000	277970000	123220000	51115000	0	15877000	200530000	0	137930000	121.64	214.853	87.865	158.694	0	60.488	62.597	0	42.603
Rv3519|Rv3519|Unknown protein|236 AA	196690000	45320000	501680000	79361000	192640000	139830000	472680000	323570000	541320000	156.59	35.03	357.734	246.387	587.525	532.72	147.55	91.862	167.201
Rv3091|Rv3091|Conserved protein|563 AA	206460000	108910000	254170000	206340000	241830000	96913000	354590000	727190000	675590000	164.368	84.181	181.242	640.611	737.548	369.216	110.688	206.45	208.673
Rv2047c|Rv2047c|Conserved hypothetical protein|854 AA	23224000	0	0	86996000	51339000	96759000	290720000	262510000	158180000	18.489	0	0	270.091	156.577	368.63	90.75	74.527	48.858
Rv0902c|prrB|Two component sensor histidine kinase PrrB|446 AA	176460000	181350000	431690000	119800000	139130000	77201000	341300000	433270000	314360000	140.484	140.172	307.826	371.936	424.327	294.118	106.539	123.006	97.098
Rv0753c|mmsA|Probable methylmalonate-semialdehyde dehydrogenase MmsA (methylmalonic acid semialdehyde dehydrogenase) (MMSDH)|510 AA	754350000	640570000	287660000	230480000	119300000	334470000	507900000	629910000	656220000	600.557	495.12	205.122	715.557	363.849	1274.25	158.545	178.832	202.69
Rv3290c|lat|Probable L-lysine-epsilon aminotransferase Lat (L-lysine aminotransferase) (lysine 6-aminotransferase)|449 AA	167210000	55439000	80905000	239280000	41400000	119660000	284200000	346250000	269680000	133.12	42.851	57.691	742.878	126.264	455.877	88.715	98.301	83.298
Rv0444c|rskA|Anti-sigma factor RskA (regulator of sigma K)|232 AA	576720000	308940000	472990000	246580000	227340000	229830000	850830000	583260000	884090000	459.141	238.791	337.276	765.542	693.356	875.6	265.592	165.588	273.074
Rv3119|moaE1|Probable molybdenum cofactor biosynthesis protein E MoaE1 (molybdopterin converting factor large subunit) (molybdopterin [MPT] converting factor	52469000	24314000	92024000	26706000	57848000	43904000	192760000	100410000	140950000	41.772	18.793	65.62	82.913	176.428	167.264	60.171	28.506	43.536
Rv1547|dnaE1|Probable DNA polymerase III (alpha chain) DnaE1 (DNA nucleotidyltransferase)|1184 AA	80682000	169030000	47290000	62214000	55314000	25152000	177280000	135020000	145670000	64.233	130.65	33.721	193.152	168.7	95.823	55.339	38.332	44.994
Rv2566|Rv2566|Long conserved protein|1140 AA	413800000	559600000	581690000	144230000	276950000	45459000	566070000	438100000	397550000	329.437	432.536	414.787	447.782	844.659	173.188	176.703	124.377	122.794
Rv0091|mtn|Probable bifunctional MTA/SAH nucleosidase Mtn: 5-methylthioadenosine nucleosidase (methylthioadenosine methylthioribohydrolase) + S-adenosylhomocysteine nucleosidase (S-adenosyl-L-homocysteine homocysteinylribohydrolase)|255 AA	79296000	113460000	39594000	32750000	102560000	20245000	119890000	152210000	186800000	63.13	87.697	28.233	101.677	312.794	77.129	37.424	43.213	57.698
Rv0986|Rv0986|Probable adhesion component transport ATP-binding protein ABC transporter|248 AA	49403000	67953000	60009000	8710300	66985000	33229000	95079000	57147000	175220000	39.331	52.523	42.791	27.042	204.295	126.595	29.68	16.224	54.121
Rv3624c|hpt|Hypoxanthine-guanine phosphoribosyltransferase Hpt (HGPRT) (HGPRTase) (hypoxanthine phosphoribosyltransferase) (imp pyrophosphorylase) (imp diphosphorylase) (transphosphoribosyltransferase) (guanine phosphoribosyltransferase)|216 AA	60804000	0	188290000	63912000	86221000	47739000	310600000	191450000	189090000	48.408	0	134.264	198.424	262.962	181.875	96.956	54.353	58.405
Rv2326c|Rv2326c|Possible transmembrane ATP-binding protein ABC transporter|697 AA	388420000	241280000	323380000	88858000	75926000	34478000	286180000	238740000	140530000	309.231	186.494	230.593	275.872	231.564	131.353	89.333	67.778	43.406
Rv0983|pepD|Probable serine protease PepD (serine proteinase) (MTB32B)|464 AA	345330000	306900000	447160000	138990000	334580000	118590000	569050000	703860000	663360000	274.926	237.214	318.857	431.514	1020.42	451.801	177.633	199.826	204.896
Rv3456c|rplQ|50S ribosomal protein L17 RplQ|180 AA	1245700000	1082800000	2784700000	251900000	736280000	512730000	899840000	2387700000	1660400000	991.733	836.936	1985.69	782.059	2245.55	1953.38	280.891	677.87	512.857
Rv3754|tyrA|Prephenate dehydrogenase TyrA (PDH) (hydroxyphenylpyruvate synthase)|301 AA	103660000	142770000	93414000	228650000	82571000	43574000	246380000	375600000	330050000	82.526	110.352	66.611	709.876	251.83	166.007	76.909	106.633	101.944
Rv1819c|bacA|Probable drug-transport transmembrane ATP-binding protein ABC transporter BacA|639 AA	116720000	98873000	56096000	100660000	231950000	168820000	489840000	592060000	587940000	92.924	76.423	40	312.513	707.416	643.166	152.907	168.086	181.6
Rv0289|espG3|ESX-3 secretion-associated protein EspG3|295 AA	51959000	59905000	63971000	55362000	41991000	15296000	117870000	64692000	221660000	41.366	46.303	45.616	171.879	128.067	58.274	36.794	18.366	68.465
Rv2400c|subI|Probable sulfate-binding lipoprotein SubI|356 AA	191420000	20178000	20412000	77125000	34166000	165490000	159900000	375580000	182320000	152.394	15.596	14.555	239.445	104.202	630.479	49.914	106.627	56.314
Rv2438c|nadE|Glutamine-dependent NAD(+) synthetase NadE (NAD(+) synthase [glutamine-hydrolysing])|679 AA	266200000	261010000	131460000	346100000	223230000	109130000	503650000	705060000	982550000	211.929	201.744	93.74	1074.52	680.821	415.76	157.218	200.167	303.486
Rv1476|Rv1476|Possible membrane protein|186 AA	143510000	20097000	227680000	105060000	155990000	135830000	1039100000	306960000	332560000	114.252	15.534	162.352	326.173	475.748	517.481	324.362	87.146	102.72
Rv1608c|bcpB|Probable peroxidoxin BcpB|154 AA	150500000	129210000	249810000	175750000	179850000	130470000	725370000	421040000	627580000	119.817	99.871	178.133	545.64	548.518	497.061	226.429	119.534	193.844
Rv3794|embA|Integral membrane indolylacetylinositol arabinosyltransferase EmbA (arabinosylindolylacetylinositol synthase)|1094 AA	187680000	497140000	356840000	95694000	159350000	166680000	296890000	614940000	543240000	149.417	384.258	254.453	297.095	485.996	635.013	92.676	174.582	167.794
Rv3797|fadE35|Probable acyl-CoA dehydrogenase FadE35|593 AA	51739000	1585000000	262130000	105020000	92797000	51884000	358830000	302440000	218460000	41.191	1225.11	186.918	326.049	283.018	197.666	112.011	85.863	67.477
Rv2906c|trmD|Probable tRNA (guanine-N1)-methyltransferase TrmD (M1G-methyltransferase) (tRNA [GM37] methyltransferase)|230 AA	115650000	80946000	37385000	54380000	56350000	45317000	195910000	205260000	154840000	92.072	62.566	26.658	168.83	171.86	172.647	61.155	58.273	47.826
Rv0563|htpX|Probable protease transmembrane protein heat shock protein HtpX|286 AA	77284000	249030000	263160000	124860000	110290000	68613000	374530000	300860000	403750000	61.528	192.485	187.652	387.645	336.369	261.4	116.912	85.414	124.709
Rv1783|eccC5|ESX conserved component EccC5. ESX-5 type VII secretion system protein.|1391 AA	1268200000	1913000000	1237000000	499560000	1075400000	359730000	1926600000	2360300000	2844300000	1009.65	1478.63	882.07	1550.95	3279.82	1370.49	601.402	670.091	878.535
Rv2950c|fadD29|Fatty-acid-AMP ligase FadD29 (fatty-acid-AMP synthetase) (fatty-acid-AMP synthase)|619 AA	278750000	447750000	329630000	189480000	139070000	100280000	485280000	726670000	316320000	221.92	346.083	235.05	588.267	424.144	382.044	151.484	206.302	97.704
Rv2614c|thrS|Probable threonyl-tRNA synthetase ThrS (threonine-tRNA synthetase)(ThrRS) (threonine-tRNA ligase)|692 AA	1169700000	775470000	434300000	376020000	551810000	308430000	1060400000	1736100000	1669300000	931.228	599.389	309.687	1167.41	1682.94	1175.05	331.011	492.88	515.606
Rv3886c|mycP2|Probable alanine and proline rich membrane-anchored mycosin MycP2 (serine protease) (subtilisin-like protease) (subtilase-like) (mycosin-2)|550 AA	110740000	103190000	166680000	37815000	128450000	18710000	201970000	211330000	144350000	88.163	79.759	118.855	117.402	391.755	71.281	63.046	59.997	44.586
Rv3014c|ligA|DNA ligase [NAD dependent] LigA (polydeoxyribonucleotide synthase [NAD+])|691 AA	432870000	379230000	423180000	171870000	185940000	132330000	678340000	600000000	510160000	344.619	293.121	301.758	533.594	567.091	504.147	211.749	170.34	157.576
Rv1596|nadC|Probable nicotinate-nucleotide pyrophosphatase NadC|285 AA	623260000	145270000	675350000	499970000	607990000	562460000	992780000	2717200000	2189300000	496.193	112.285	481.573	1552.23	1854.29	2142.84	309.903	771.415	676.222
Rv1771|Rv1771|L-gulono-1	1943700000	1879700000	2644000000	1520500000	974230000	1290300000	4540000000	3981700000	3030400000	1547.43	1452.89	1885.36	4720.6	2971.27	4915.75	1417.19	1130.41	936.017
Rv0811c|Rv0811c|Conserved protein|368 AA	117700000	106010000	0	51600000	203450000	28286000	110300000	186140000	1069100000	93.704	81.939	0	160.199	620.494	107.763	34.431	52.845	330.219
Rv3888c|Rv3888c|Probable conserved membrane protein|341 AA	616090000	909620000	927970000	252010000	272690000	262740000	838210000	996310000	977160000	490.485	703.079	661.71	782.4	831.667	1000.98	261.653	282.853	301.821
Rv0777|purB|Probable adenylosuccinate lyase PurB (adenylosuccinase) (ASL) (ASASE)|472 AA	487700000	352920000	528500000	63832000	515100000	273740000	692810000	1003800000	838870000	388.27	272.785	376.859	198.175	1570.98	1042.89	216.265	284.979	259.107
Rv2883c|pyrH|Probable uridylate kinase PyrH (UK) (uridine monophosphate kinase) (UMP kinase)|261 AA	358360000	164890000	416260000	276370000	495380000	318910000	1307400000	1344900000	1406800000	285.299	127.45	296.823	858.029	1510.84	1214.97	408.114	381.818	434.526
Rv2951c|Rv2951c|Possible oxidoreductase|381 AA	440890000	945210000	1782000000	365560000	649640000	123900000	823730000	1681600000	1459900000	351.004	730.588	1270.69	1134.93	1981.31	472.031	257.133	477.407	450.928
Rv0906|Rv0906|Conserved protein|372 AA	73814000	68050000	24873000	111090000	102140000	100390000	160930000	554750000	544890000	58.765	52.598	17.736	344.894	311.513	382.463	50.235	157.494	168.303
Rv1629|polA|Probable DNA polymerase I PolA|904 AA	966200000	842170000	1122800000	474300000	575550000	411100000	1724900000	1838800000	1849700000	769.216	650.944	800.637	1472.53	1755.35	1566.2	538.44	522.037	571.328
Rv2219|Rv2219|Probable conserved transmembrane protein|250 AA	220100000	439730000	368970000	62484000	281850000	145380000	337430000	803010000	552390000	175.227	339.884	263.102	193.99	859.604	553.864	105.331	227.975	170.62
Rv0562|grcC1|Probable polyprenyl-diphosphate synthase GrcC1 (polyprenyl pyrophosphate synthetase)|335 AA	591770000	639050000	818130000	213600000	392170000	172520000	1326200000	825250000	929770000	471.123	493.945	583.386	663.151	1196.06	657.262	413.983	234.289	287.183
Rv3286c|sigF|Alternative RNA polymerase sigma factor SigF|261 AA	16893000	17835000	27580000	3487000	0	17828000	53785000	62979000	0	13.449	13.785	19.667	10.826	0	67.921	16.789	17.88	0
Rv1096|Rv1096|Possible glycosyl hydrolase|291 AA	205080000	143960000	162480000	68883000	66180000	57081000	288540000	357540000	126930000	163.269	111.272	115.86	213.857	201.84	217.466	90.07	101.506	39.206
Rv2315c|Rv2315c|Conserved protein|505 AA	282790000	470420000	605450000	155250000	143050000	120280000	366660000	642940000	554120000	225.136	363.605	431.73	481.995	436.283	458.239	114.455	182.531	171.154
Rv2677c|hemY|Probable protoporphyrinogen oxidase HemY (protoporphyrinogen-IX oxidase) (protoporphyrinogenase) (PPO)|452 AA	30008000	34882000	167510000	23743000	112570000	23041000	1216800000	61813000	77334000	23.89	26.962	119.447	73.713	343.323	87.781	379.833	17.549	23.887
Rv3672c|Rv3672c|Conserved hypothetical protein|273 AA	82770000	121280000	93566000	77831000	77318000	63123000	289760000	215230000	347800000	65.895	93.742	66.719	241.637	235.809	240.484	90.451	61.104	107.427
Rv0969|ctpV|Probable metal cation transporter P-type ATPase CtpV|770 AA	272530000	300130000	428120000	185100000	84536000	122480000	335370000	639470000	377130000	216.968	231.982	305.28	574.669	257.823	466.621	104.688	181.546	116.486
Rv3147|nuoC|Probable NADH dehydrogenase I (chain C) NuoC (NADH-ubiquinone oxidoreductase chain C)|236 AA	391850000	523740000	90924000	275580000	384700000	270390000	1043900000	1163200000	1408100000	311.962	404.818	64.835	855.577	1173.28	1030.12	325.861	330.233	434.928
Rv3485c|Rv3485c|Probable short-chain type dehydrogenase/reductase|314 AA	140060000	291720000	181260000	92709000	263150000	111200000	394420000	621060000	765700000	111.505	225.481	129.251	287.828	802.571	423.647	123.121	176.319	236.506
Rv1798|eccA5|ESX conserved component EccA5. ESX-5 type VII secretion system protein.|610 AA	166320000	216090000	88236000	102590000	114800000	72302000	244230000	450140000	447870000	132.412	167.024	62.919	318.505	350.124	275.454	76.238	127.795	138.336
Rv2284|lipM|Probable esterase LipM|431 AA	421430000	400630000	569690000	40559000	116860000	225780000	217720000	541950000	451270000	335.511	309.662	406.23	125.921	356.407	860.17	67.963	153.86	139.386
Rv2457c|clpX|Probable ATP-dependent CLP protease ATP-binding subunit ClpX|426 AA	170320000	144160000	157640000	171640000	246470000	118080000	616990000	559070000	1016700000	135.596	111.427	112.409	532.88	751.7	449.858	192.598	158.72	314.034
Rv2845c|proS|Probable prolyl-tRNA synthetase ProS (proline--tRNA ligase) (PRORS) (global RNA synthesis factor) (proline translase)|582 AA	1345000000	1354100000	1104900000	328580000	625660000	227590000	1203700000	1619300000	1826900000	1070.79	1046.63	787.873	1020.12	1908.18	867.066	375.743	459.72	564.285
Rv2158c|murE|Probable UDP-N-acetylmuramoylalanyl-D-glutamate-2	546020000	792510000	673920000	273570000	391850000	336560000	1047900000	1429500000	1361800000	434.7	612.56	480.554	849.336	1195.09	1282.22	327.109	405.836	420.627
Rv1628c|Rv1628c|Conserved protein|163 AA	30764000	32002000	88095000	44330000	30108000	45889000	57710000	351750000	139890000	24.492	24.736	62.818	137.629	91.825	174.827	18.015	99.862	43.209
Rv0172|mce1D|Mce-family protein Mce1D|530 AA	55651000	123210000	248010000	67432000	115370000	52054000	431210000	203970000	346360000	44.305	95.234	176.849	209.352	351.863	198.314	134.605	57.907	106.982
Rv0675|echA5|Probable enoyl-CoA hydratase EchA5 (enoyl hydrase) (unsaturated acyl-CoA hydratase) (crotonase)|263 AA	447900000	495810000	359860000	110160000	344470000	279500000	885690000	825210000	1015400000	356.584	383.23	256.606	342.007	1050.59	1064.83	276.474	234.278	313.632
Rv2565|Rv2565|Conserved protein|583 AA	35857000	211510000	96949000	54784000	165490000	103900000	324050000	441910000	458260000	28.547	163.484	69.132	170.085	504.722	395.835	101.154	125.459	141.545
Rv1206|fadD6|Probable fatty-acid-CoA ligase FadD6 (fatty-acid-CoA synthetase) (fatty-acid-CoA synthase)|597 AA	304410000	210760000	228190000	152150000	299280000	208780000	602530000	914260000	1131600000	242.348	162.904	162.716	472.371	912.763	795.404	188.084	259.559	349.524
Rv3885c|eccE2|ESX conserved component EccE2. ESX-2 type VII secretion system protein. Possible membrane protein.|537 AA	32844000	0	74188000	22173000	77708000	22380000	115490000	118670000	229590000	26.148	0	52.901	68.839	236.999	85.263	36.051	33.69	70.915
Rv2157c|murF|Probable UDP-N-acetylmuramoylalanyl-D-glutamyl-2	493840000	317660000	463330000	109720000	135320000	76305000	193190000	559890000	654440000	393.158	245.531	330.388	340.641	412.707	290.705	60.306	158.953	202.141
Rv0445c|sigK|Alternative RNA polymerase sigma factor SigK|187 AA	251820000	35349000	45534000	159660000	57237000	80762000	243020000	402100000	377490000	200.48	27.323	32.469	495.687	174.565	307.685	75.86	114.156	116.598
Rv0546c|Rv0546c|Conserved protein|128 AA	25357000	256030000	342410000	21020000	145840000	42814000	184070000	408030000	140490000	20.187	197.895	244.163	65.26	444.792	163.112	57.459	115.84	43.394
Rv1466|Rv1466|Conserved protein|115 AA	0	39010000	34294000	44635000	94174000	43179000	259370000	263070000	201020000	0	30.152	24.454	138.576	287.218	164.502	80.964	74.686	62.09
Rv1159A|Rv1159A|Unknown protein|94 AA	0	46477000	177200000	174890000	240000000	94528000	264250000	1168100000	829310000	0	35.924	126.356	542.97	731.967	360.13	82.487	331.624	256.154
Rv2671|ribD|Possible bifunctional enzyme riboflavin biosynthesis protein RibD: diaminohydroxyphosphoribosylaminopyrimidine deaminase (riboflavin-specific deaminase) + 5-amino-6-(5-phosphoribosylamino)uracil reductase (HTP reductase)|258 AA	185300000	107790000	247170000	33558000	47333000	42034000	148330000	177460000	166390000	147.522	83.315	176.25	104.186	144.359	160.14	46.302	50.381	51.394
Rv0041|leuS|Probable leucyl-tRNA synthetase LeuS (leucine--tRNA ligase) (LEURS)|969 AA	968950000	1139300000	1076800000	267460000	735640000	359070000	2186200000	1930400000	1481200000	771.406	880.607	767.836	830.367	2243.6	1367.97	682.438	548.042	457.507
Rv3261|fbiA|Probable F420 biosynthesis protein FbiA|331 AA	59398000	61320000	65737000	106990000	201950000	59321000	359350000	494860000	599100000	47.288	47.396	46.875	332.165	615.92	225.999	112.174	140.491	185.047
Rv3264c|manB|D-alpha-D-mannose-1-phosphate guanylyltransferase ManB (D-alpha-D-heptose-1-phosphate guanylyltransferase)|359 AA	551260000	337130000	363680000	286810000	711150000	273250000	1269100000	1904800000	2001400000	438.872	260.58	259.33	890.442	2168.91	1041.02	396.158	540.774	618.184
Rv3913|trxB2|Probable thioredoxin reductase TrxB2 (TRXR) (TR)|335 AA	925470000	787700000	927990000	237580000	200070000	163760000	515580000	981600000	922120000	736.79	608.842	661.724	737.6	610.186	623.888	160.942	278.677	284.821
Rv1201c|dapD|Tetrahydrodipicolinate N-succinyltransferase DapD|317 AA	1361800000	1215200000	1304600000	572900000	987910000	409870000	2729000000	2880500000	2748000000	1084.16	939.273	930.274	1778.65	3012.99	1561.51	851.876	817.776	848.791
Rv3213c|Rv3213c|Possible SOJ/para-related protein|266 AA	376790000	294300000	258720000	89573000	64037000	42876000	124110000	378040000	333130000	299.972	227.475	184.486	278.092	195.304	163.348	38.742	107.326	102.896
Rv1609|trpE|Anthranilate synthase component I TrpE (glutamine amidotransferase)|516 AA	467730000	117970000	464050000	433210000	291780000	293280000	1232300000	1487700000	1159400000	372.372	91.183	330.901	1344.96	889.889	1117.33	384.671	422.359	358.111
Rv3509c|ilvX|Probable acetohydroxyacid synthase IlvX (acetolactate synthase)|515 AA	670670000	1159000000	181850000	1169500000	698360000	183190000	2999300000	2394600000	2004900000	533.937	895.834	129.672	3630.88	2129.9	697.912	936.252	679.829	619.265
Rv0788|purQ|Probable phosphoribosylformylglycinamidine synthase I PURG (FGAM synthase I)|224 AA	288360000	263320000	219800000	249760000	281360000	88996000	761000000	860240000	842940000	229.571	203.53	156.733	775.415	858.109	339.054	237.551	244.223	260.364
Rv3193c|Rv3193c|Probable conserved transmembrane protein|992 AA	1873400000	1803900000	1548600000	577250000	318420000	356230000	1421100000	1523100000	1739600000	1491.46	1394.3	1104.26	1792.15	971.137	1357.15	443.606	432.409	537.32
Rv3399|Rv3399|Possible S-adenosylmethionine-dependent methyltransferase|348 AA	138430000	197590000	139660000	106860000	322280000	80003000	891830000	617860000	548620000	110.208	152.725	99.588	331.762	982.91	304.793	278.391	175.411	169.455
Rv0458|Rv0458|Probable aldehyde dehydrogenase|507 AA	846120000	420840000	557460000	396450000	95381000	80545000	342990000	724030000	718560000	673.617	325.283	397.509	1230.83	290.899	306.858	107.067	205.553	221.946
Rv3410c|guaB3|Probable inosine-5-monophosphate dehydrogenase GuaB3 (imp dehydrogenase) (inosinic acid dehydrogenase) (inosinate dehydrogenase) (imp oxidoreductase) (inosine-5-monophosphate oxidoreductase) (IMPDH) (IMPD)|375 AA	1209600000	904980000	1501700000	223340000	255710000	1001400000	953800000	1675000000	1508500000	962.993	699.493	1070.82	693.39	779.88	3815.11	297.735	475.534	465.939
Rv1905c|aao|Probable D-amino acid oxidase Aao|320 AA	55215000	74885000	101160000	108320000	45971000	34455000	252470000	282440000	172330000	43.958	57.881	72.134	336.295	140.205	131.266	78.81	80.185	53.229
Rv3441c|mrsA|Probable phospho-sugar mutase / MrsA protein homolog|448 AA	344530000	0	138020000	139720000	148150000	169020000	706620000	579700000	627810000	274.289	0	98.418	433.78	451.837	643.927	220.576	164.577	193.915
Rv0809|purM|Probable phosphoribosylformylglycinamidine CYCLO-ligase PurM (AIRS) (phosphoribosyl-aminoimidazole synthetase) (air synthase)|364 AA	310930000	121390000	261940000	261920000	309790000	262830000	1254500000	1247100000	1035000000	247.539	93.827	186.782	813.167	944.817	1001.32	391.601	354.053	319.686
Rv1181|pks4|Probable polyketide beta-ketoacyl synthase Pks4|1582 AA	1514300000	1175500000	1322400000	270290000	797450000	315700000	2240900000	1723300000	2223000000	1205.57	908.587	942.967	839.153	2432.11	1202.74	699.512	489.246	686.631
Rv2922A|acyP|Probable acylphosphatase AcyP (acylphosphate phosphohydrolase)|93 AA	153860000	117330000	36815000	37562000	334130000	40730000	278390000	469510000	496230000	122.492	90.689	26.252	116.616	1019.05	155.172	86.901	133.294	153.273
Rv1463|Rv1463|Probable conserved ATP-binding protein ABC transporter|266 AA	472270000	477270000	391160000	557300000	331250000	379920000	1330300000	2366200000	1182600000	375.986	368.9	278.925	1730.22	1010.27	1447.41	415.262	671.766	365.276
Rv1600|hisC1|Probable histidinol-phosphate aminotransferase HisC1|380 AA	523350000	447530000	259980000	291170000	218430000	193310000	804610000	1194700000	878700000	416.652	345.912	185.385	903.978	666.181	736.467	251.165	339.176	271.409
Rv1235|lpqY|Probable sugar-binding lipoprotein LpqY|468 AA	130500000	148460000	135590000	193180000	64011000	129010000	448690000	545890000	383900000	103.894	114.75	96.685	599.754	195.225	491.499	140.062	154.979	118.577
Rv2737c|recA|RecA protein (recombinase A) [contains: endonuclease PI-MTUI (MTU RecA intein)].|790 AA	89013000	468590000	314640000	113710000	128310000	61163000	431500000	526890000	351350000	70.865	362.191	224.361	353.029	391.328	233.017	134.696	149.584	108.523
Rv0873|fadE10|Probable acyl-CoA dehydrogenase FadE10|650 AA	2185800000	1554700000	2367200000	1759800000	2409300000	1608000000	7684100000	9005200000	8424100000	1740.17	1201.68	1687.98	5463.55	7348.03	6126.11	2398.64	2556.58	2602
Rv3907c|pcnA|Probable poly(A) polymerase PcnA (polynucleotide adenylyltransferase) (NTP polymerase) (RNA adenylating enzyme) (poly(A) polymerase)|480 AA	259200000	502200000	386350000	262560000	286670000	148790000	1305700000	1002600000	819170000	206.356	388.169	275.495	815.154	874.304	566.856	407.583	284.639	253.022
Rv1141c|echA11|Probable enoyl-CoA hydratase EchA11 (enoyl hydrase) (unsaturated acyl-CoA hydratase) (crotonase)|268 AA	233600000	92569000	108340000	115530000	35110000	16527000	138170000	174690000	232160000	185.975	71.55	77.254	358.679	107.081	62.964	43.131	49.595	71.709
Rv2844|Rv2844|Conserved alanine rich protein|162 AA	28730000	0	82023000	24383000	33626000	29036000	615830000	184390000	18725000	22.873	0	58.488	75.7	102.555	110.621	192.236	52.348	5.784
Rv2363|amiA2|Probable amidase AmiA2 (aminohydrolase)|484 AA	98432000	118260000	0	51049000	136190000	92938000	374600000	426070000	383040000	78.364	91.408	0	158.489	415.361	354.072	116.934	120.962	118.312
Rv1007c|metS|Methionyl-tRNA synthetase MetS (MetRS) (methionine--tRNA ligase)|519 AA	320370000	124410000	85780000	98251000	128000000	111600000	344970000	570000000	587380000	255.055	96.161	61.167	305.034	390.382	425.17	107.685	161.823	181.427
Rv0613c|Rv0613c|Unknown protein|855 AA	772520000	629850000	735140000	363980000	501070000	389370000	1957900000	1618200000	2194100000	615.023	486.834	524.208	1130.03	1528.19	1483.41	611.172	459.408	677.704
Rv2701c|suhB|Inositol-1-monophosphatase SuhB|290 AA	186660000	301360000	59826000	49875000	44325000	33035000	133720000	245670000	186090000	148.605	232.932	42.66	154.844	135.185	125.856	41.742	69.746	57.479
Rv2586c|secF|Probable protein-export membrane protein SecF|442 AA	393060000	466510000	112530000	98158000	161650000	116820000	759060000	562960000	414110000	312.925	360.583	80.242	304.745	493.01	445.057	236.946	159.825	127.909
Rv1333|Rv1333|Probable hydrolase|344 AA	0	46680000	0	173360000	65721000	11821000	304990000	189890000	258010000	0	36.081	0	538.22	200.44	45.035	95.205	53.91	79.693
Rv0932c|pstS2|Periplasmic phosphate-binding lipoprotein PstS2 (PBP-2) (PstS2)|370 AA	1030300000	796560000	787160000	88120000	268570000	657370000	1255100000	1190600000	787060000	820.248	615.691	561.302	273.581	819.102	2504.43	391.788	338.012	243.104
Rv2716|Rv2716|Conserved protein|228 AA	196910000	144940000	198850000	135940000	97015000	45276000	388850000	412320000	354030000	156.765	112.029	141.794	422.045	295.882	172.491	121.382	117.058	109.351
Rv1399c|nlhH|Probable non lipolytic carboxylesterase NlhH|319 AA	68775000	212450000	133990000	48979000	29322000	61044000	197220000	214950000	152810000	54.754	164.21	95.545	152.062	89.428	232.564	61.564	61.024	47.199
Rv1314c|Rv1314c|Conserved protein|193 AA	52614000	70512000	63425000	80570000	67609000	17607000	86470000	339420000	316640000	41.887	54.501	45.227	250.141	206.198	67.079	26.992	96.362	97.802
Rv0525|Rv0525|Conserved protein|202 AA	152280000	165400000	165770000	212050000	377260000	255450000	1168500000	1305000000	1325500000	121.234	127.844	118.206	658.339	1150.59	973.206	364.755	370.49	409.415
Rv0052|Rv0052|Conserved protein|187 AA	0	0	33935000	37639000	78271000	98254000	370250000	280140000	261520000	0	0	24.198	116.856	238.716	374.325	115.576	79.532	80.777
Rv2124c|metH|5-methyltetrahydrofolate--homocystein methyltransferase MetH (methionine synthase	73321000	15442000	97763000	103880000	54879000	35751000	260470000	378900000	181700000	58.373	11.936	69.712	322.51	167.373	136.203	81.308	107.57	56.123
Rv2683|Rv2683|Conserved protein|165 AA	366020000	36801000	207860000	39963000	90543000	149660000	414660000	361520000	324100000	291.398	28.445	148.219	124.071	276.144	570.17	129.439	102.636	100.107
Rv1409|ribG|Probable bifunctional riboflavin biosynthesis protein RibG : diaminohydroxyphosphoribosylaminopyrimidine deaminase (riboflavin-specific deaminase) + 5-amino-6-(5-phosphoribosylamino) uracil reductase (HTP reductase)|339 AA	922170000	411420000	897570000	160610000	641370000	78374000	785060000	1236500000	1355600000	734.163	318.002	640.032	498.636	1956.09	298.587	245.062	351.043	418.712
Rv0296c|Rv0296c|Probable sulfatase|465 AA	228750000	193180000	205480000	313750000	350960000	167310000	837300000	1562300000	1387400000	182.114	149.316	146.522	974.081	1070.38	637.413	261.369	443.538	428.534
Rv3870|eccCa1|ESX conserved component EccCa1. ESX-1 type VII secretion system protein. Possible transmembrane protein.|747 AA	172590000	415430000	522280000	101290000	169880000	79729000	223920000	1007800000	586450000	137.403	321.101	372.423	314.469	518.111	303.749	69.898	286.115	181.14
Rv0400c|fadE7|Acyl-CoA dehydrogenase FadE7|395 AA	573570000	782090000	444490000	261060000	118050000	173050000	797060000	662690000	823120000	456.634	604.506	316.953	810.497	360.036	659.281	248.808	188.138	254.242
Rv1384|carB|Probable carbamoyl-phosphate synthase large chain CarB (carbamoyl-phosphate synthetase ammonia chain)|1115 AA	309170000	658410000	442060000	257230000	395460000	181030000	1229700000	1268300000	1447800000	246.138	508.909	315.221	798.606	1206.1	689.683	383.859	360.071	447.19
Rv1697|Rv1697|Conserved hypothetical protein|393 AA	64869000	143540000	126090000	61274000	144070000	25616000	184530000	523030000	299860000	51.644	110.947	89.911	190.234	439.394	97.591	57.602	148.489	92.619
Rv2334|cysK1|Cysteine synthase a CysK1 (O-acetylserine sulfhydrylase A) (O-acetylserine (thiol)-lyase A) (CSASE A)|310 AA	548120000	329110000	235400000	256970000	320110000	174390000	1023900000	1216200000	1298400000	436.372	254.381	167.857	797.799	976.291	664.386	319.617	345.28	401.044
Rv2089c|pepE|Dipeptidase PepE|375 AA	188130000	222400000	229470000	27734000	57801000	28193000	894110000	142550000	47703000	149.775	171.901	163.629	86.104	176.285	107.409	279.103	40.47	14.734
Rv1082|mca|Mycothiol conjugate amidase Mca (mycothiol S-conjugate amidase)|288 AA	349770000	237030000	386870000	93035000	193270000	45712000	625080000	456220000	428020000	278.461	183.209	275.866	288.84	589.447	174.152	195.123	129.521	132.205
Rv3301c|phoY1|Probable phosphate-transport system transcriptional regulatory protein PhoU homolog 1 PhoY1|221 AA	116480000	285800000	180270000	149830000	186100000	175370000	1059300000	977900000	501180000	92.733	220.905	128.546	465.168	567.579	668.12	330.668	277.626	154.802
Rv1185c|fadD21|Probable fatty-acid-AMP ligase FadD21 (fatty-acid-AMP synthetase) (fatty-acid-AMP synthase)|578 AA	1987800000	1366700000	1197600000	635980000	373480000	491360000	2294800000	2093400000	2076300000	1582.54	1056.37	853.975	1974.49	1139.06	1871.97	716.338	594.318	641.319
Rv3849|espR|ESX-1 transcriptional regulatory protein EspR|132 AA	2646300000	2446700000	3289600000	783840000	1022800000	414620000	4414700000	3832000000	3467800000	2106.79	1891.14	2345.72	2433.54	3119.4	1579.61	1378.08	1087.91	1071.12
Rv2486|echA14|Probable enoyl-CoA hydratase EchA14 (enoyl hydrase) (unsaturated acyl-CoA hydratase) (crotonase)|256 AA	264310000	485530000	185380000	297110000	83582000	205410000	680710000	719700000	792970000	210.424	375.284	132.189	922.42	254.914	782.565	212.488	204.323	244.929
Rv1650|pheT|Probable phenylalanyl-tRNA synthetase	293550000	581570000	422960000	489540000	362520000	158140000	813210000	1829700000	2054000000	233.703	449.517	301.601	1519.85	1105.64	602.477	253.849	519.453	634.431
Rv3392c|cmaA1|Cyclopropane-fatty-acyl-phospholipid synthase 1 CmaA1 (cyclopropane fatty acid synthase) (CFA synthase) (cyclopropane mycolic acid synthase 1)|287 AA	467850000	878010000	541120000	197550000	158580000	44864000	426170000	741960000	574520000	372.467	678.646	385.858	613.322	483.647	170.922	133.032	210.643	177.455
Rv2139|pyrD|Probable dihydroorotate dehydrogenase PyrD|357 AA	0	31597000	90083000	51818000	29857000	54895000	90594000	327580000	254550000	0	24.422	64.236	160.876	91.06	209.137	28.28	93	78.624
Rv2500c|fadE19|Possible acyl-CoA dehydrogenase FadE19 (MMGC)|394 AA	163560000	77179000	260540000	184310000	85643000	257820000	463400000	1075000000	573710000	130.214	59.655	185.784	572.216	261.199	982.235	144.654	305.193	177.205
Rv1480|Rv1480|Conserved protein|317 AA	208820000	82846000	106310000	120020000	102230000	207270000	325670000	1007000000	632840000	166.247	64.035	75.807	372.619	311.787	789.651	101.66	285.888	195.469
Rv2130c|mshC|Cysteine:1D-myo-inosityl 2-amino-2-deoxy--D-glucopyranoside ligase MshC|414 AA	341500000	194480000	133900000	81586000	148940000	60621000	501180000	477460000	435110000	271.877	150.321	95.48	253.295	454.246	230.952	156.447	135.551	134.395
Rv2921c|ftsY|Probable cell division protein FtsY (SRP receptor) (signal recognition particle receptor)|422 AA	346830000	780030000	529240000	106770000	385590000	218870000	1133700000	1040900000	1154200000	276.12	602.914	377.386	331.482	1176	833.845	353.892	295.512	356.504
Rv0129c|fbpC|Secreted antigen 85-C FbpC (85C) (antigen 85 complex C) (AG58C) (mycolyl transferase 85C) (fibronectin-binding protein C)|340 AA	141190000	352090000	0	134200000	399720000	149490000	819960000	1191800000	1238700000	112.405	272.143	0	416.643	1219.09	569.523	255.956	338.353	382.604
Rv0134|ephF|Possible epoxide hydrolase EphF (epoxide hydratase) (arene-oxide hydratase)|300 AA	36192000	54003000	62555000	113240000	49094000	68722000	554190000	230990000	329860000	28.813	41.741	44.606	351.569	149.73	261.815	172.994	65.578	101.886
Rv3149|nuoE|Probable NADH dehydrogenase I (chain E) NuoE (NADH-ubiquinone oxidoreductase chain E)|252 AA	725410000	677050000	110890000	254770000	119500000	53059000	547540000	599110000	616990000	577.517	523.317	79.073	790.969	364.459	202.143	170.918	170.088	190.573
Rv1843c|guaB1|Probable inosine-5-monophosphate dehydrogenase GuaB1(imp dehydrogenase) (IMPDH) (IMPD)|479 AA	1072800000	1127000000	820240000	416530000	575850000	282800000	1962600000	1943200000	2721700000	854.083	871.1	584.89	1293.18	1756.26	1077.4	612.639	551.676	840.667
Rv2357c|glyS|Probable glycyl-tRNA synthetase GlyS (glycine--tRNA ligase) (GLYRS)|463 AA	701260000	748850000	719210000	91844000	494940000	542760000	1754100000	1343700000	1561900000	558.291	578.814	512.849	285.143	1509.5	2067.79	547.554	381.477	482.433
Rv3006|lppZ|Probable conserved lipoprotein LppZ|373 AA	604930000	975400000	708990000	239120000	59607000	157440000	462570000	593700000	659670000	481.6	753.923	505.561	742.381	181.793	599.81	144.394	168.552	203.756
Rv1423|whiA|Probable transcriptional regulatory protein WhiA|325 AA	525630000	511450000	809690000	86461000	267500000	340350000	515950000	1312700000	1249500000	418.467	395.319	577.367	268.43	815.838	1296.66	161.057	372.676	385.94
Rv1589|bioB|Probable biotin synthetase BioB|349 AA	184820000	206710000	108080000	78378000	106970000	54189000	334020000	430620000	421100000	147.14	159.774	77.069	243.335	326.244	206.448	104.267	122.253	130.068
Rv0443|Rv0443|Conserved protein|171 AA	324990000	163550000	148780000	192570000	347360000	36404000	965930000	783430000	650490000	258.733	126.414	106.091	597.86	1059.4	138.691	301.522	222.416	200.921
Rv0734|mapA|Methionine aminopeptidase MapA (map) (peptidase M) (MetAP)|266 AA	351910000	481630000	414480000	165880000	149380000	71448000	604310000	622870000	639160000	280.164	372.27	295.554	514.998	455.588	272.201	188.64	176.833	197.421
Rv2095c|pafC|Proteasome accessory factor C PafC|316 AA	59540000	135840000	76944000	60085000	51869000	59324000	148900000	402960000	330040000	47.401	104.996	54.867	186.542	158.193	226.011	46.48	114.401	101.941
Rv0800|pepC|Probable aminopeptidase PepC|433 AA	1526100000	1658700000	817230000	14608000	212530000	25358000	202850000	358430000	211020000	1214.97	1282.07	582.744	45.353	648.187	96.608	63.321	101.759	65.179
Rv1124|ephC|Probable epoxide hydrolase EphC (epoxide hydratase)|316 AA	303510000	432410000	290680000	71249000	178610000	66729000	325940000	764340000	482790000	241.632	334.226	207.276	221.202	544.736	254.222	101.744	216.997	149.122
Rv1006|Rv1006|Unknown protein|567 AA	291170000	362060000	505820000	237070000	201420000	147700000	954800000	854310000	1110400000	231.808	279.85	360.686	736.017	614.303	562.703	298.047	242.539	342.976
Rv0489|gpm1|Probable phosphoglycerate mutase 1 Gpm1 (phosphoglyceromutase) (PGAM) (BPG-dependent PGAM)|249 AA	682580000	534880000	916000000	414520000	264580000	379150000	1041900000	1956400000	1763100000	543.419	413.429	653.174	1286.93	806.933	1444.47	325.236	555.423	544.579
Rv2510c|Rv2510c|Conserved protein|533 AA	319660000	316320000	214630000	48172000	398020000	47563000	990960000	719190000	287470000	254.489	244.495	153.047	149.557	1213.91	181.204	309.335	204.179	88.793
Rv3099c|Rv3099c|Conserved protein|283 AA	1126000000	1714400000	773910000	336690000	508600000	366240000	2370800000	1746100000	2452900000	896.437	1325.12	551.854	1045.3	1551.16	1395.29	740.062	495.719	757.641
Rv0479c|Rv0479c|Probable conserved membrane protein|348 AA	1137800000	1489200000	1475300000	135690000	278840000	152900000	1022300000	1040600000	820870000	905.831	1151.06	1051.99	421.269	850.424	582.514	319.118	295.427	253.547
Rv2967c|pca|Probable pyruvate carboxylase Pca (pyruvic carboxylase)|1127 AA	409700000	448250000	572870000	333760000	359000000	93822000	1142800000	1063900000	1652400000	326.172	346.469	408.498	1036.2	1094.9	357.44	356.733	302.042	510.386
Rv0904c|accD3|Putative acetyl-coenzyme A carboxylase carboxyl transferase (subunit beta) AccD3 (accase beta chain)|495 AA	0	8821700	0	10950000	16999000	8967600	58987000	83274000	48789000	0	6.819	0	33.996	51.845	34.165	18.413	23.642	15.07
Rv0407|fgd1|F420-dependent glucose-6-phosphate dehydrogenase Fgd1|336 AA	330280000	473270000	647750000	571150000	150620000	378620000	1129500000	1442800000	1520100000	262.944	365.808	461.893	1773.21	459.37	1442.45	352.581	409.612	469.522
Rv3646c|topA|DNA topoisomerase I TopA (omega-protein) (relaxing enzyme) (untwisting enzyme) (swivelase) (type I DNA topoisomerase) (nicking-closing enzyme) (TOPO I)|934 AA	957420000	1085100000	1354000000	844500000	573940000	610990000	2363600000	3282700000	3706200000	762.226	838.714	965.5	2621.87	1750.44	2327.73	737.814	931.961	1144.76
Rv3223c|sigH|Alternative RNA polymerase sigma-E factor (sigma-24) SigH (RPOE)|216 AA	623000000	915220000	967890000	282960000	316980000	63726000	974470000	1185200000	897240000	495.986	707.407	690.175	878.489	966.745	242.781	304.188	336.479	277.136
Rv1306|atpF|Probable ATP synthase B chain AtpF|171 AA	1961400000	1183100000	1504300000	596600000	703620000	381520000	2613900000	3260600000	2665000000	1561.52	914.462	1072.67	1852.23	2145.94	1453.5	815.947	925.686	823.154
Rv1099c|glpX|Fructose 1	3041600000	2178200000	3074800000	730110000	1384300000	164410000	4875300000	3948900000	2625100000	2421.49	1683.61	2192.55	2266.73	4221.92	626.364	1521.86	1121.1	810.83
Rv1454c|qor|Probable quinone reductase Qor (NADPH:quinone reductase) (zeta-crystallin homolog protein)|328 AA	196760000	848810000	1466200000	225970000	325660000	307980000	1094700000	1518000000	1808700000	156.646	656.077	1045.51	701.555	993.218	1173.33	341.718	430.961	558.664
Rv2467|pepN|Probable aminopeptidase N PepN (Lysyl aminopeptidase) (LYS-AP) (alanine aminopeptidase)|861 AA	1575400000	1829900000	1539700000	569870000	950790000	817820000	4860300000	5275300000	3850700000	1254.22	1414.4	1097.92	1769.24	2899.78	3115.71	1517.18	1497.66	1189.39
Rv3274c|fadE25|Probable acyl-CoA dehydrogenase FadE25|389 AA	4274300000	5313100000	3486600000	1804400000	1747400000	930040000	7375700000	7131600000	7370400000	3402.88	4106.69	2486.2	5602.01	5329.33	3543.24	2302.38	2024.67	2276.54
Rv0386|Rv0386|Probable transcriptional regulatory protein (probably LuxR/UhpA-family)|1085 AA	37213000	51862000	0	11806000	17665000	6661800	79936000	91755000	30288000	29.626	40.086	0	36.653	53.876	25.38	24.953	26.049	9.355
Rv1324|Rv1324|Possible thioredoxin|304 AA	996970000	797630000	677900000	320910000	291830000	282930000	1257300000	1735900000	1507200000	793.713	616.518	483.392	996.31	890.041	1077.9	392.475	492.823	465.538
Rv3866|espG1|ESX-1 secretion-associated protein EspG1|283 AA	111600000	65156000	70350000	59646000	58712000	89124000	354570000	353670000	330280000	88.848	50.361	50.165	185.179	179.064	339.542	110.681	100.407	102.015
Rv3084|lipR|Probable acetyl-hydrolase/esterase LipR|308 AA	402350000	125900000	95071000	92697000	77697000	119020000	409000000	678960000	374990000	320.321	97.313	67.792	287.791	236.965	453.439	127.672	192.757	115.825
Rv3683|Rv3683|Conserved protein|319 AA	149560000	253330000	539230000	159670000	363740000	59713000	1127700000	854200000	859410000	119.068	195.808	384.51	495.718	1109.36	227.493	352.019	242.508	265.451
Rv1655|argD|Probable acetylornithine aminotransferase ArgD|400 AA	525270000	245930000	397470000	56326000	75147000	51268000	492150000	209180000	368270000	418.181	190.088	283.425	174.872	229.188	195.319	153.628	59.386	113.75
Rv2901c|Rv2901c|Conserved protein|101 AA	101320000	334140000	84281000	131260000	181680000	64140000	577340000	535310000	934940000	80.663	258.269	60.098	407.515	554.099	244.359	180.221	151.975	288.78
Rv2572c|aspS|Probable aspartyl-tRNA synthetase AspS (aspartate--tRNA ligase) (ASPRS) (aspartic acid translase)|596 AA	316170000	183590000	241880000	107160000	203170000	83904000	660820000	604630000	893170000	251.711	141.904	172.478	332.693	619.641	319.655	206.28	171.655	275.879
Rv0125|pepA|Probable serine protease PepA (serine proteinase) (MTB32A)|355 AA	204120000	1037500000	54252000	66168000	113630000	79554000	2075400000	87504000	865710000	162.505	801.922	38.686	205.428	346.556	303.083	647.851	24.842	267.397
Rv0178|Rv0178|Probable conserved Mce associated membrane protein|244 AA	313560000	127830000	41208000	57431000	107470000	58222000	283720000	323470000	716240000	249.633	98.805	29.384	178.303	327.769	221.812	88.565	91.833	221.229
Rv2496c|bkdB|Probable branched-chain keto acid dehydrogenase E1 component	202080000	100690000	76961000	138790000	89437000	60445000	394970000	646830000	438750000	160.881	77.827	54.879	430.893	272.771	230.282	123.293	183.635	135.519
Rv1173|fbiC|Probable F420 biosynthesis protein FbiC|856 AA	0	19379000	0	48996000	71665000	25975000	443560000	248780000	162020000	0	14.979	0	152.115	218.568	98.959	138.46	70.629	50.044
Rv0411c|glnH|Probable glutamine-binding lipoprotein GlnH (GLNBP)|328 AA	51011000	49418000	66343000	45861000	87072000	35162000	263810000	281250000	362610000	40.611	38.197	47.307	142.382	265.558	133.959	82.35	79.847	112.001
Rv0985c|mscL|Possible large-conductance ion mechanosensitive channel MscL|151 AA	82351000	361310000	107940000	56218000	29413000	41972000	870630000	128210000	102250000	65.562	279.27	76.969	174.537	89.706	159.904	271.773	36.399	31.583
Rv0646c|lipG|Probable lipase/esterase LipG|301 AA	0	0	163320000	60430000	83284000	67145000	258050000	485720000	424190000	0	0	116.459	187.613	254.005	255.807	80.552	137.896	131.022
Rv2682c|dxs1|Probable 1-deoxy-D-xylulose 5-phosphate synthase Dxs1 (1-deoxyxylulose-5-phosphate synthase) (DXP synthase) (DXPS)|638 AA	343090000	491420000	238500000	130670000	93688000	126070000	403390000	842280000	585710000	273.143	379.837	170.068	405.683	285.735	480.298	125.921	239.124	180.912
Rv2873|mpt83|Cell surface lipoprotein Mpt83 (lipoprotein P23)|220 AA	231200000	174960000	82068000	144070000	160090000	69170000	939290000	690190000	468980000	184.064	135.233	58.52	447.285	488.252	263.522	293.206	195.945	144.857
Rv0982|mprB|Two component sensor kinase MprB|504 AA	83682000	39861000	50803000	41753000	23469000	5029800	210360000	67933000	70283000	66.621	30.81	36.226	129.628	71.577	19.162	65.665	19.286	21.709
Rv0469|umaA|Possible mycolic acid synthase UmaA|286 AA	1305400000	1402500000	2736200000	636250000	921120000	599430000	4317100000	4274400000	3293800000	1039.26	1084.04	1951.11	1975.33	2809.29	2283.69	1347.61	1213.51	1017.38
Rv1640c|lysX|Lysyl-tRNA synthetase 2 LysX|1172 AA	278640000	444350000	230200000	56604000	162350000	22898000	974260000	242940000	244610000	221.832	343.455	164.149	175.735	495.145	87.236	304.122	68.971	75.554
Rv0153c|ptbB|Phosphotyrosine protein phosphatase PTPB (protein-tyrosine-phosphatase) (PTPase)|276 AA	283070000	606090000	713480000	234030000	154820000	92728000	808390000	1000100000	678520000	225.359	468.469	508.763	726.579	472.18	353.272	252.345	283.929	209.578
Rv0694|lldD1|Possible L-lactate dehydrogenase (cytochrome) LldD1|396 AA	490750000	748620000	40793000	158880000	39634000	159890000	378200000	480360000	600080000	390.698	578.636	29.088	493.265	120.878	609.144	118.058	136.375	185.35
Rv1112|Rv1112|Probable GTP binding protein|357 AA	38245000	72696000	241020000	81551000	117580000	58265000	352620000	439430000	703450000	30.448	56.189	171.865	253.186	358.603	221.976	110.073	124.754	217.279
Rv3868|eccA1|ESX conserved component EccA1. ESX-1 type VII secretion system protein.|573 AA	973070000	962600000	871670000	792930000	256110000	476810000	1748900000	2937300000	1686500000	774.686	744.029	621.564	2461.76	781.1	1816.54	545.931	833.901	520.919
Rv0050|ponA1|Probable bifunctional penicillin-binding protein 1A/1B PonA1 (murein polymerase) (PBP1): penicillin-insensitive transglycosylase (peptidoglycan TGASE) + penicillin-sensitive transpeptidase (DD-transpeptidase)|678 AA	232000000	162960000	209040000	36925000	147040000	21465000	379510000	231820000	375450000	184.701	125.958	149.061	114.639	448.452	81.777	118.467	65.814	115.967
Rv2115c|mpa|Mycobacterial proteasome ATPase Mpa|609 AA	724300000	438240000	367350000	324680000	570180000	165590000	1729100000	2364900000	1728300000	576.633	338.732	261.947	1008.01	1738.97	630.86	539.751	671.397	533.83
Rv3356c|folD|Probable bifunctional protein FolD: methylenetetrahydrofolate dehydrogenase + methenyltetrahydrofolate cyclohydrolase|281 AA	344750000	253140000	288840000	114300000	434790000	243270000	1140700000	1708500000	1322700000	274.464	195.661	205.964	354.86	1326.05	926.803	356.077	485.044	408.55
Rv2703|sigA|RNA polymerase sigma factor SigA (sigma-A)|528 AA	1410600000	1012300000	756230000	572010000	399950000	429500000	2504600000	2599300000	2267400000	1123.01	782.444	539.247	1775.88	1219.79	1636.3	781.828	737.943	700.345
Rv1832|gcvB|Probable glycine dehydrogenase GcvB (glycine decarboxylase) (glycine cleavage system P-protein)|941 AA	333970000	191840000	392970000	173780000	254240000	161220000	723730000	1541500000	1147400000	265.882	148.28	280.216	539.524	775.397	614.211	225.917	437.633	354.404
Rv3038c|Rv3038c|Conserved protein|327 AA	234350000	311600000	349510000	30190000	111640000	126470000	469690000	465400000	387960000	186.572	240.847	249.226	93.729	340.487	481.822	146.617	132.127	119.831
Rv2773c|dapB|Dihydrodipicolinate reductase DapB (DHPR)|245 AA	123580000	388980000	385110000	84024000	605760000	83967000	1261600000	919970000	1373100000	98.385	300.657	274.611	260.864	1847.48	319.895	393.817	261.18	424.117
Rv3146|nuoB|Probable NADH dehydrogenase I (chain B) NuoB (NADH-ubiquinone oxidoreductase chain B)|184 AA	172490000	81017000	36708000	148790000	4236300	107110000	77246000	272800000	254320000	137.324	62.621	26.175	461.939	12.92	408.065	24.113	77.448	78.553
Rv1017c|prsA|Probable ribose-phosphate pyrophosphokinase PrsA (phosphoribosyl pyrophosphate synthetase) (PRPP synthetase)|326 AA	2160600000	2561500000	2111900000	1017900000	1122500000	703760000	5051700000	4720300000	5096100000	1720.11	1979.88	1505.94	3160.21	3423.47	2681.16	1576.92	1340.1	1574.06
Rv0015c|pknA|Transmembrane serine/threonine-protein kinase A PknA (protein kinase A) (STPK A)|431 AA	101900000	254520000	86341000	88175000	166910000	110610000	730960000	554770000	902820000	81.125	196.728	61.567	273.752	509.053	421.399	228.174	157.5	278.859
Rv0127|mak|Maltokinase Mak|455 AA	550460000	368740000	644520000	249890000	74323000	381840000	869470000	1011500000	870690000	438.235	285.013	459.589	775.818	226.675	1454.72	271.411	287.166	268.935
Rv1512|epiA|Probable nucleotide-sugar epimerase EpiA|322 AA	229440000	36609000	290300000	142900000	64196000	69267000	458840000	561260000	420260000	182.663	28.296	207.005	443.653	195.789	263.891	143.23	159.342	129.808
Rv1708|Rv1708|Putative initiation inhibitor protein|318 AA	480120000	225410000	245160000	80142000	93499000	169540000	194350000	933120000	1016800000	382.236	174.228	174.817	248.812	285.159	645.909	60.668	264.913	314.065
Rv0497|Rv0497|Probable conserved transmembrane protein|310 AA	299280000	442010000	305790000	72651000	197220000	79722000	877440000	663660000	506990000	238.264	341.646	218.05	225.555	601.494	303.723	273.899	188.414	156.597
Rv3826|fadD23|Probable fatty-acid-AMP ligase FadD23 (fatty-acid-AMP synthetase) (fatty-acid-AMP synthase)|584 AA	491860000	204030000	275260000	262580000	64815000	194490000	386060000	1015400000	983220000	391.582	157.702	196.28	815.216	197.677	740.962	120.511	288.273	303.693
Rv1056|Rv1056|Conserved protein|254 AA	243840000	178590000	202470000	142300000	40853000	204550000	634440000	596620000	402190000	194.127	138.039	144.376	441.79	124.596	779.289	198.045	169.381	124.227
Rv0761c|adhB|Possible zinc-containing alcohol dehydrogenase NAD dependent AdhB|375 AA	6641000000	4583300000	2445700000	841970000	926430000	90654000	3300900000	2908700000	3598000000	5287.07	3542.6	1743.96	2614.01	2825.48	345.371	1030.4	825.782	1111.34
Rv1293|lysA|Diaminopimelate decarboxylase LysA (DAP decarboxylase)|447 AA	217080000	260620000	513890000	149830000	252120000	48384000	917700000	780040000	770900000	172.823	201.443	366.441	465.168	768.931	184.332	286.466	221.454	238.112
Rv2150c|ftsZ|Cell division protein FtsZ|379 AA	601260000	529500000	607380000	305210000	207020000	400440000	1211600000	1972000000	1458100000	478.678	409.27	433.106	947.567	631.382	1525.59	378.209	559.852	450.372
Rv3887c|eccD2|ESX conserved component EccD2. ESX-2 type VII secretion system protein. Probable transmembrane protein.|509 AA	0	209530000	45268000	63424000	38385000	24557000	237170000	199830000	276820000	0	161.953	32.279	196.909	117.069	93.557	74.034	56.732	85.503
Rv3042c|serB2|Probable phosphoserine phosphatase SerB2 (PSP) (O-phosphoserine phosphohydrolase) (pspase)|409 AA	354880000	325870000	371210000	105250000	517180000	106100000	1620400000	1135400000	1165800000	282.529	251.877	264.7	326.763	1577.33	404.217	505.819	322.341	360.087
Rv0410c|pknG|Serine/threonine-protein kinase PknG (protein kinase G) (STPK G)|750 AA	313660000	421090000	351120000	206190000	257340000	27870000	878730000	581840000	1023000000	249.713	325.476	250.374	640.146	784.852	106.178	274.302	165.185	315.98
Rv2831|echA16|Probable enoyl-CoA hydratase EchA16 (enoyl hydrase) (unsaturated acyl-CoA hydratase) (crotonase)|249 AA	257760000	324520000	433940000	427490000	276440000	529020000	1804600000	2018500000	2645800000	205.209	250.834	309.431	1327.2	843.104	2015.44	563.318	573.053	817.223
Rv1703c|Rv1703c|Probable catechol-O-methyltransferase|196 AA	393240000	534970000	598380000	140760000	140440000	97118000	728940000	887980000	659950000	313.068	413.498	426.688	437.009	428.323	369.997	227.544	252.098	203.843
Rv3368c|Rv3368c|Possible oxidoreductase|214 AA	382010000	577080000	359660000	137970000	445220000	135150000	1479100000	1546800000	1149800000	304.128	446.046	256.464	428.347	1357.86	514.891	461.711	439.138	355.145
Rv2212|Rv2212|Adenylyl cyclase (ATP pyrophosphate-lyase) (adenylate cyclase)|378 AA	103100000	200370000	253610000	102070000	21945000	61315000	216770000	357220000	284580000	82.081	154.873	180.842	316.891	66.929	233.596	67.666	101.415	87.9
Rv2345|Rv2345|Possible conserved transmembrane protein|660 AA	697730000	927130000	592910000	433000000	251150000	407490000	1956800000	2187300000	1680700000	555.48	716.613	422.788	1344.31	765.973	1552.44	610.829	620.976	519.127
Rv2447c|folC|Probable folylpolyglutamate synthase protein FolC (folylpoly-gamma-glutamate synthetase) (FPGS)|487 AA	287640000	291480000	348390000	40787000	136370000	225080000	436080000	854880000	711770000	228.997	225.296	248.427	126.629	415.91	857.503	136.125	242.701	219.849
Rv3788|Rv3788|Hypothetical protein|161 AA	558550000	504320000	728760000	157510000	127810000	120240000	936170000	759180000	792670000	444.676	389.808	519.659	489.012	389.803	458.087	292.232	215.532	244.837
Rv0173|lprK|Possible Mce-family lipoprotein LprK (Mce-family lipoprotein Mce1E)|390 AA	210310000	72699000	72718000	26648000	40224000	22223000	164410000	229110000	162020000	167.433	56.192	51.853	82.732	122.678	84.665	51.322	65.044	50.044
Rv0927c|Rv0927c|Probable short-chain type dehydrogenase/reductase|263 AA	76281000	44812000	240020000	101310000	31116000	151750000	326540000	488310000	462770000	60.729	34.637	171.152	314.531	94.9	578.133	101.932	138.632	142.938
Rv0643c|mmaA3|Methoxy mycolic acid synthase 3 MmaA3 (methyl mycolic acid synthase 3) (MMA3) (hydroxy mycolic acid synthase)|293 AA	498910000	399530000	484460000	401180000	61401000	326500000	1045100000	691570000	1564700000	397.195	308.812	345.455	1245.52	187.265	1243.89	326.235	196.337	483.298
Rv1229c|mrp|Probable Mrp-related protein Mrp|390 AA	629390000	243690000	463640000	147340000	209210000	130520000	540290000	1809000000	926810000	501.073	188.357	330.609	457.438	638.062	497.251	168.655	513.576	286.269
Rv2605c|tesB2|Probable acyl-CoA thioesterase II TesB2 (TEII)|281 AA	180050000	65499000	137600000	55551000	81172000	68963000	385890000	525280000	388200000	143.342	50.627	98.119	172.466	247.563	262.733	120.458	149.127	119.906
Rv0270|fadD2|Probable fatty-acid-CoA ligase FadD2 (fatty-acid-CoA synthetase) (fatty-acid-CoA synthase)|560 AA	3626000000	4136000000	3156500000	649940000	1162900000	813560000	4920800000	6523600000	6292900000	2886.75	3196.87	2250.81	2017.83	3546.68	3099.48	1536.06	1852.05	1943.72
Rv1166|lpqW|Probable conserved lipoprotein LpqW|635 AA	56518000	48631000	86100000	32187000	119210000	18403000	276740000	292600000	337570000	44.995	37.589	61.396	99.929	363.574	70.111	86.386	83.069	104.267
Rv2448c|valS|Probable valyl-tRNA synthase protein ValS (valyl-tRNA synthetase) (valine--tRNA ligase) (valine translase)|876 AA	679190000	479380000	600250000	248970000	330870000	167010000	1928300000	1786700000	1241400000	540.72	370.531	428.022	772.962	1009.11	636.27	601.932	507.245	383.438
Rv0896|gltA2|Probable citrate synthase I GltA2|431 AA	3524700000	2856400000	4172200000	1242700000	1533800000	850930000	8076500000	7668400000	7145000000	2806.1	2207.82	2975.08	3858.14	4677.88	3241.85	2521.14	2177.06	2206.92
Rv2048c|pks12|Polyketide synthase Pks12|4151 AA	721310000	372620000	668980000	181420000	530700000	211880000	2266400000	1856100000	1999600000	574.253	288.012	477.031	563.244	1618.56	807.214	707.472	526.948	617.628
Rv2889c|tsf|Probable elongation factor Tsf (EF-ts)|271 AA	2750600000	3286500000	3237900000	1179000000	1996900000	1111000000	11006000000	10793000000	7455000000	2189.82	2540.26	2308.86	3660.37	6090.27	4232.65	3435.6	3064.14	2302.67
Rv0014c|pknB|Transmembrane serine/threonine-protein kinase B PknB (protein kinase B) (STPK B)|626 AA	392610000	264310000	605370000	78522000	282000000	101260000	1036700000	1098900000	734680000	312.567	204.295	431.673	243.783	860.061	385.777	323.613	311.978	226.925
Rv1080c|greA|Probable transcription elongation factor GreA (transcript cleavage factor GreA)|164 AA	2225000000	1939900000	1700800000	565570000	878420000	687680000	3605300000	4986100000	3918300000	1771.38	1499.42	1212.79	1755.89	2679.06	2619.9	1125.42	1415.56	1210.27
Rv2068c|blaC|Class a beta-lactamase BlaC|307 AA	43351000	0	58786000	58634000	33704000	96330000	223620000	389180000	471560000	34.513	0	41.919	182.037	102.793	366.995	69.805	110.488	145.653
Rv2210c|ilvE|Branched-chain amino acid transaminase IlvE|368 AA	472280000	440900000	803170000	304990000	149670000	125920000	1083600000	1275500000	1080000000	375.994	340.788	572.718	946.884	456.473	479.726	338.253	362.115	333.586
Rv0647c|Rv0647c|Conserved protein|488 AA	210510000	268590000	337980000	73060000	454000000	86647000	1354700000	1181300000	878060000	167.592	207.603	241.004	226.825	1384.64	330.105	422.879	335.372	271.211
Rv3795|embB|Integral membrane indolylacetylinositol arabinosyltransferase EmbB (arabinosylindolylacetylinositol synthase)|1098 AA	158120000	89092000	193170000	134750000	102300000	59500000	1265300000	581630000	373450000	125.883	68.863	137.744	418.35	312.001	226.681	394.972	165.125	115.35
Rv3645|Rv3645|Probable conserved transmembrane protein|549 AA	241560000	56584000	231790000	101380000	101760000	44404000	376660000	680510000	558510000	192.312	43.736	165.283	314.748	310.354	169.169	117.577	193.197	172.51
Rv1617|pykA|Probable pyruvate kinase PykA|472 AA	1617500000	592750000	2479900000	545150000	556040000	262220000	4900500000	3057600000	3977900000	1287.73	458.158	1768.35	1692.49	1695.85	998.998	1529.72	868.055	1228.68
Rv1218c|Rv1218c|Probable tetronasin-transport ATP-binding protein ABC transporter|311 AA	88506000	0	54883000	64526000	137320000	35665000	254100000	627340000	713960000	70.462	0	39.136	200.33	418.807	135.875	79.319	178.102	220.525
Rv1649|pheS|Probable phenylalanyl-tRNA synthetase	132960000	21535000	303100000	105620000	175700000	37233000	930270000	592840000	551250000	105.853	16.645	216.132	327.912	535.861	141.849	290.39	168.308	170.268
Rv2935|ppsE|Phenolpthiocerol synthesis type-I polyketide synthase PpsE|1488 AA	374550000	334600000	155980000	220100000	439380000	302170000	2021100000	2409900000	1994000000	298.189	258.625	111.225	683.331	1340.05	1151.2	630.9	684.172	615.898
Rv2483c|plsC|Possible transmembrane phospholipid biosynthesis bifunctional enzyme PlsC: putative L-3-phosphoserine phosphatase (O-phosphoserine phosphohydrolase) (PSP) (pspase) + 1-acyl-SN-glycerol-3-phosphate acyltransferase (1-AGP acyltransferase) (1-AGP	252040000	0	269930000	25435000	62468000	111800000	273470000	382910000	493140000	200.655	0	192.48	78.967	190.519	425.932	85.366	108.708	152.319
Rv2427c|proA|Probable gamma-glutamyl phosphate reductase protein ProA (GPR) (glutamate-5-semialdehyde dehydrogenase) (glutamyl-gamma-semialdehyde dehydrogenase)|415 AA	404930000	462240000	137170000	230100000	371730000	427840000	1432300000	2256500000	3178800000	322.375	357.282	97.812	714.378	1133.72	1629.97	447.102	640.622	981.854
Rv3240c|secA1|Probable preprotein translocase SecA1 1 subunit|949 AA	2210200000	1499900000	2984500000	586250000	998180000	340180000	3815400000	4787600000	4008900000	1759.6	1159.33	2128.16	1820.1	3044.31	1296.01	1191	1359.2	1238.25
Rv3302c|glpD2|Probable glycerol-3-phosphate dehydrogenase GlpD2|585 AA	479650000	226770000	702670000	57977000	194870000	101530000	689170000	834280000	770910000	381.861	175.279	501.054	179.998	594.327	386.806	215.129	236.853	238.115
Rv0889c|citA|Probable citrate synthase II CitA|373 AA	270180000	600590000	540430000	144020000	162580000	139280000	730040000	1168600000	1171900000	215.097	464.218	385.366	447.13	495.847	530.625	227.887	331.766	361.972
Rv0265c|Rv0265c|Probable periplasmic iron-transport lipoprotein|330 AA	0	0	0	25103000	38579000	15592000	177020000	214160000	148880000	0	0	0	77.936	117.661	59.402	55.258	60.8	45.985
Rv2567|Rv2567|Conserved hypothetical alanine and leucine rich protein|884 AA	30237000	410400000	248100000	26085000	165640000	69301000	389600000	472920000	703750000	24.072	317.213	176.913	80.985	505.179	264.021	121.616	134.262	217.371
Rv1899c|lppD|Possible lipoprotein LppD|343 AA	504770000	256720000	435330000	64612000	67025000	198690000	484940000	832720000	518740000	401.86	198.428	310.422	200.597	204.417	756.963	151.377	236.41	160.226
Rv2241|aceE|Pyruvate dehydrogenase E1 component AceE (pyruvate decarboxylase) (pyruvate dehydrogenase) (pyruvic dehydrogenase)|901 AA	3441000000	3310900000	4244100000	928100000	1399400000	487940000	6175400000	6752600000	7057400000	2739.47	2559.12	3026.35	2881.42	4267.98	1858.94	1927.69	1917.07	2179.86
Rv2524c|fas|Probable fatty acid synthase Fas (fatty acid synthetase)|3069 AA	6603700000	4901900000	4095100000	1502600000	2210600000	2319600000	11183000000	13496000000	13475000000	5257.37	3788.86	2920.1	4665.03	6742.03	8837.15	3490.85	3831.52	4162.1
Rv1527c|pks5|Probable polyketide synthase Pks5|2108 AA	0	7438100	2710300000	72071000	73593000	77379000	647810000	592850000	352590000	0	5.749	1932.64	223.754	224.449	294.796	202.218	168.311	108.907
Rv0391|metZ|Probable O-succinylhomoserine sulfhydrylase MetZ (OSH sulfhydrylase)|406 AA	221860000	199720000	192170000	180830000	43455000	326760000	666440000	1236400000	526840000	176.628	154.371	137.031	561.412	132.532	1244.88	208.034	351.015	162.728
Rv3436c|glmS|Probable glucosamine--fructose-6-phosphate aminotransferase [isomerizing] GlmS (hexosephosphate aminotransferase) (D-fructose-6-phosphate amidotransferase) (GFAT) (L-glutamine-D-fructose-6-phosphate amidotransferase) (glucosamine-6-phosphate s	665790000	407850000	938190000	209260000	251520000	220180000	2665600000	1759700000	897210000	530.052	315.242	668.997	649.677	767.101	838.835	832.086	499.58	277.126
Rv1836c|Rv1836c|Conserved protein|677 AA	1079800000	597860000	671790000	307430000	785380000	125270000	2456300000	3019500000	2333900000	859.656	462.108	479.035	954.459	2395.3	477.25	766.751	857.238	720.885
Rv3692|moxR2|Probable methanol dehydrogenase transcriptional regulatory protein MoxR2|358 AA	472310000	478370000	667110000	702740000	107170000	612550000	1328600000	2169400000	2128800000	376.018	369.75	475.698	2181.76	326.854	2333.68	414.732	615.894	657.535
Rv1059|Rv1059|Conserved protein|354 AA	58409000	50238000	54204000	11448000	23476000	40878000	156840000	206330000	113230000	46.501	38.831	38.651	35.542	71.599	155.736	48.959	58.577	34.974
Rv3270|ctpC|Probable metal cation-transporting P-type ATPase C CtpC|718 AA	870460000	384410000	991350000	527640000	421330000	500230000	3095600000	3481100000	2921700000	692.995	297.125	706.904	1638.13	1285	1905.76	966.313	988.287	902.442
Rv3880c|espL|ESX-1 secretion-associated protein EspL|115 AA	1248400000	1259300000	928200000	113620000	150990000	109890000	118200000	1920700000	2245700000	993.883	973.36	661.874	352.749	460.499	418.656	36.897	545.288	693.642
Rv0731c|Rv0731c|Possible S-adenosylmethionine-dependent methyltransferase|318 AA	529290000	724680000	454760000	151270000	283010000	50479000	1063200000	1236400000	866590000	421.381	560.132	324.277	469.639	863.142	192.313	331.885	351.015	267.669
Rv3010c|pfkA|Probable 6-phosphofructokinase PfkA (phosphohexokinase) (phosphofructokinase)|343 AA	196030000	0	139670000	39573000	74474000	38762000	220100000	414110000	512740000	156.064	0	99.595	122.86	227.135	147.674	68.706	117.566	158.373
Rv2259|mscR|S-nitrosomycothiol reductase MscR|361 AA	230580000	170190000	45655000	18420000	152590000	98411000	404810000	569800000	552140000	183.571	131.546	32.555	57.187	465.378	374.923	126.364	161.767	170.543
Rv0281|Rv0281|Possible S-adenosylmethionine-dependent methyltransferase|302 AA	648820000	484820000	1093900000	435610000	148010000	418920000	2057500000	2251900000	1268100000	516.542	374.735	780.03	1352.41	451.41	1595.99	642.263	639.316	391.685
Rv1295|thrC|Threonine synthase ThrC (ts)|360 AA	1326500000	1149100000	2088800000	133630000	320350000	288930000	1384500000	1977900000	1736600000	1056.06	888.182	1489.46	414.873	977.023	1100.76	432.181	561.527	536.394
Rv0644c|mmaA2|Methoxy mycolic acid synthase 2 MmaA2 (methyl mycolic acid synthase 2) (MMA2) (hydroxy mycolic acid synthase)|287 AA	2657600000	1780900000	1023700000	402040000	1431400000	59346000	1814400000	3782500000	3897500000	2115.78	1376.52	729.972	1248.19	4365.57	226.095	566.378	1073.85	1203.84
Rv3805c|aftB|Possible arabinofuranosyltransferase AftB|627 AA	0	37964000	34501000	61587000	41522000	48939000	297970000	342250000	444110000	0	29.344	24.602	191.205	126.636	186.446	93.013	97.165	137.175
Rv1232c|Rv1232c|Conserved protein|435 AA	198990000	253220000	225550000	35689000	145940000	69618000	419760000	688390000	602080000	158.421	195.723	160.833	110.801	445.097	265.229	131.031	195.434	185.968
Rv2226|Rv2226|Conserved protein|513 AA	1482400000	1018500000	1104300000	472910000	742700000	371820000	3549100000	4308400000	3892800000	1180.18	787.236	787.446	1468.21	2265.13	1416.55	1107.88	1223.16	1202.39
Rv2563|Rv2563|Probable glutamine-transport transmembrane protein ABC transporter|349 AA	379030000	240650000	811150000	473340000	333000000	107010000	2266400000	2201100000	1650700000	301.755	186.007	578.409	1469.55	1015.6	407.684	707.472	624.894	509.861
Rv1279|Rv1279|Probable dehydrogenase FAD flavoprotein GMC oxidoreductase|528 AA	131080000	257490000	185190000	28777000	57074000	59830000	531500000	435130000	178600000	104.356	199.024	132.054	89.342	174.068	227.939	165.911	123.534	55.165
Rv0993|galU|UTP--glucose-1-phosphate uridylyltransferase GalU (UDP-glucose pyrophosphorylase) (UDPGP) (alpha-D-glucosyl-1-phosphate uridylyltransferase) (uridine diphosphoglucose pyrophosphorylase)|306 AA	205200000	52963000	252720000	36113000	78869000	32833000	319680000	440010000	316490000	163.365	40.937	180.208	112.118	240.54	125.086	99.79	124.919	97.756
Rv1260|Rv1260|Probable oxidoreductase|372 AA	561300000	176280000	523970000	270590000	87429000	100490000	1089800000	1161000000	645040000	446.865	136.253	373.628	840.084	266.646	382.844	340.189	329.609	199.237
Rv0006|gyrA|DNA gyrase (subunit A) GyrA (DNA topoisomerase (ATP-hydrolysing)) (DNA topoisomerase II) (type II DNA topoisomerase)|838 AA	2966700000	3524400000	3194300000	977980000	885470000	1053500000	5696500000	7537500000	7106800000	2361.86	2724.14	2277.77	3036.28	2700.56	4013.59	1778.2	2139.9	2195.12
Rv1086|Rv1086|Short (C15) chain Z-isoprenyl diphosphate synthase (Z-FPP synthase) (Z-farnesyl diphosphate synthase) (Z-FPP synthetase) (Z-farnesyl diphosphate synthetase) (geranyltranstransferase) (farnesyl pyrophosphate synthetase)|262 AA	30016000	111180000	0	36636000	66077000	32645000	324760000	371610000	322930000	23.896	85.935	0	113.742	201.526	124.37	101.376	105.5	99.745
Rv3411c|guaB2|Probable inosine-5-monophosphate dehydrogenase GuaB2 (imp dehydrogenase) (inosinic acid dehydrogenase) (inosinate dehydrogenase) (imp oxidoreductase) (inosine-5-monophosphate oxidoreductase) (IMPDH) (IMPD)|529 AA	752640000	875330000	1233000000	113080000	338610000	316620000	2116500000	1455400000	2222200000	599.196	676.575	879.218	351.073	1032.71	1206.25	660.68	413.189	686.384
Rv0844c|narL|Possible nitrate/nitrite response transcriptional regulatory protein NarL|216 AA	0	348310000	330390000	159450000	93500000	54892000	568960000	847150000	740290000	0	269.222	235.592	495.035	285.162	209.126	177.605	240.506	228.658
Rv3009c|gatB|Probable glutamyl-tRNA(GLN) amidotransferase (subunit B) GatB (Glu-ADT subunit B)|509 AA	876890000	1230200000	843600000	285310000	342210000	190440000	2307200000	2382500000	1649700000	698.114	950.867	601.548	885.785	1043.69	725.533	720.208	676.393	509.552
Rv1827|garA|Conserved protein with FHA domain	1377900000	1275200000	1161300000	733360000	989790000	677790000	5904300000	6351700000	5818100000	1096.98	985.649	828.091	2276.82	3018.72	2582.22	1843.07	1803.25	1797.07
Rv1202|dapE|Probable succinyl-diaminopimelate desuccinylase DapE|354 AA	129210000	448240000	276120000	58247000	69639000	143690000	396760000	701510000	789140000	102.867	346.461	196.894	180.836	212.389	547.426	123.851	199.159	243.746
Rv2922c|smc|Probable chromosome partition protein Smc|1205 AA	434740000	381870000	333770000	127030000	153490000	125090000	1313100000	965160000	975570000	346.107	295.161	238.002	394.382	468.123	476.564	409.893	274.01	301.33
Rv2187|fadD15|Long-chain-fatty-acid-CoA ligase FadD15 (fatty-acid-CoA synthetase) (fatty-acid-CoA synthase)|600 AA	1605100000	2384100000	2173400000	559530000	702870000	530130000	4954600000	4642000000	4519800000	1277.86	1842.76	1549.79	1737.14	2143.66	2019.67	1546.61	1317.87	1396.06
Rv1438|tpi|Probable triosephosphate isomerase Tpi (TIM)|261 AA	701790000	588940000	299240000	38197000	754340000	384190000	1732600000	2346600000	1948600000	558.713	455.214	213.38	118.588	2300.63	1463.68	540.843	666.201	601.875
Rv3598c|lysS|Lysyl-tRNA synthetase 1 LysS (lysine--tRNA ligase 1) (LysRS 1) (lysine translase)|505 AA	502180000	441480000	568040000	217290000	257470000	91192000	1334900000	1696900000	1267800000	399.798	341.236	405.054	674.607	785.248	347.421	416.698	481.751	391.593
Rv0457c|Rv0457c|Probable peptidase|673 AA	416880000	538330000	383160000	26376000	91993000	56195000	389040000	464470000	423330000	331.889	416.095	273.221	81.888	280.566	214.09	121.442	131.863	130.756
Rv1957|Rv1957|Hypothetical protein|181 AA	85999000	155790000	33628000	53085000	55819000	40025000	352230000	424170000	399680000	68.466	120.416	23.979	164.81	170.24	152.486	109.951	120.422	123.451
Rv1747|Rv1747|Probable conserved transmembrane ATP-binding protein ABC transporter|865 AA	608930000	652610000	390530000	138250000	467340000	75883000	1697900000	1653800000	1416500000	484.785	504.426	278.476	429.216	1425.32	289.097	530.011	469.515	437.523
Rv0202c|mmpL11|Probable conserved transmembrane transport protein MmpL11|966 AA	43519000	70895000	68523000	39834000	29464000	23580000	318750000	221920000	199480000	34.647	54.797	48.862	123.67	89.861	89.834	99.5	63.003	61.615
Rv2344c|dgt|Probable deoxyguanosine triphosphate triphosphohydrolase Dgt (dGTPase) (dGTP triphosphohydrolase)|431 AA	101750000	509470000	320940000	135650000	82414000	26303000	620210000	602580000	444980000	81.006	393.788	228.853	421.144	251.351	100.208	193.603	171.073	137.444
Rv0468|fadB2|3-hydroxybutyryl-CoA dehydrogenase FadB2 (beta-hydroxybutyryl-CoA dehydrogenase) (BHBD)|286 AA	1729500000	885690000	1987900000	393280000	622590000	351020000	3554400000	3921400000	3617700000	1376.9	684.583	1417.52	1220.99	1898.81	1337.31	1109.53	1113.29	1117.42
Rv2691|ceoB|TRK system potassium uptake protein CeoB|227 AA	543040000	689880000	737760000	124570000	143280000	147110000	991530000	1304400000	952580000	432.328	533.234	526.076	386.745	436.984	560.455	309.513	370.32	294.229
Rv0440|groEL2|60 kDa chaperonin 2 GroEL2 (protein CPN60-2) (GroEL protein 2) (65 kDa antigen) (heat shock protein 65) (cell wall protein A) (antigen A)|540 AA	121830000000	112920000000	94431000000	32486000000	2467700000	19100000000	151110000000	187990000000	186620000000	96991.9	87280	67336.1	100857	7526.15	72766.6	47170	53370.5	57642.4
Rv1869c|Rv1869c|Probable reductase|411 AA	1818400000	499820000	1908300000	345180000	234250000	168190000	1558800000	1876400000	2354900000	1447.67	386.329	1360.76	1071.66	714.43	640.765	486.59	532.711	727.372
Rv0712|Rv0712|Conserved protein|299 AA	86954000	103510000	0	23956000	18564000	15341000	114220000	150630000	209370000	69.226	80.007	0	74.375	56.618	58.446	35.655	42.764	64.669
Rv0511|hemD|Probable uroporphyrin-III C-methyltransferase HemD (uroporphyrinogen III methylase) (urogen III methylase) (SUMT) (urogen III methylase) (UROM)|565 AA	350430000	344540000	283490000	230360000	236960000	154740000	1938900000	1704800000	1471500000	278.986	266.308	202.149	715.185	722.695	589.524	605.241	483.994	454.511
Rv1192|Rv1192|Unknown protein|275 AA	217790000	220470000	171670000	74992000	54753000	48743000	372210000	588450000	452800000	173.388	170.409	122.413	232.823	166.989	185.7	116.188	167.061	139.859
Rv1980c|mpt64|Immunogenic protein Mpt64 (antigen Mpt64/MPB64)|228 AA	4509900000	1487900000	3236900000	415380000	496410000	511070000	3738400000	3986800000	4938600000	3590.45	1150.05	2308.14	1289.61	1513.98	1947.06	1166.97	1131.86	1525.41
Rv0509|hemA|Probable glutamyl-tRNA reductase HemA (GLUTR)|468 AA	79032000	93210000	151440000	40201000	163170000	31338000	670670000	687640000	341810000	62.919	72.045	107.988	124.81	497.646	119.391	209.354	195.221	105.577
Rv3493c|Rv3493c|Conserved hypothetical Mce associated alanine and valine rich protein|242 AA	0	119110000	45523000	55515000	45985000	21910000	275900000	300890000	405160000	0	92.065	32.461	172.354	140.248	83.472	86.124	85.423	125.144
Rv0315|Rv0315|Possible beta-1	361510000	211850000	115100000	466550000	43886000	124810000	732500000	997380000	1137400000	287.807	163.747	82.075	1448.47	133.846	475.498	228.655	283.157	351.315
Rv0500A|Rv0500A|Conserved protein|78 AA	171480000	128050000	129510000	48521000	111260000	48003000	474700000	649740000	540100000	136.52	98.975	92.35	150.64	339.328	182.88	148.181	184.462	166.824
Rv1746|pknF|Anchored-membrane serine/threonine-protein kinase PknF (protein kinase F) (STPK F)|476 AA	419150000	293260000	333570000	151710000	33515000	99192000	547490000	624480000	573200000	333.696	226.672	237.859	471.005	102.216	377.899	170.903	177.29	177.048
Rv0211|pckA|Probable iron-regulated phosphoenolpyruvate carboxykinase [GTP] PckA (phosphoenolpyruvate carboxylase) (PEPCK)(pep carboxykinase)|606 AA	4434100000	3464400000	5066000000	373800000	1062300000	442240000	4901600000	5620600000	5164400000	3530.1	2677.76	3612.42	1160.51	3239.87	1684.83	1530.07	1595.69	1595.16
Rv1603|hisA|Probable phosphoribosylformimino-5-aminoimidazole carboxamide ribotide isomerase HisA|245 AA	525340000	478780000	399110000	41954000	75702000	240410000	376710000	813630000	1109300000	418.236	370.067	284.594	130.252	230.881	915.907	117.593	230.99	342.636
Rv0066c|icd2|Probable isocitrate dehydrogenase [NADP] Icd2 (oxalosuccinate decarboxylase) (IDH) (NADP+-specific ICDH) (IDP)|745 AA	3928000000	4039900000	4070800000	900030000	1149600000	1097100000	8111200000	7796700000	8474400000	3127.18	3122.59	2902.77	2794.27	3506.12	4179.7	2531.97	2213.49	2617.54
Rv2222c|glnA2|Probable glutamine synthetase GlnA2 (glutamine synthase) (GS-II)|446 AA	1327400000	1230400000	1397900000	70746000	414950000	213980000	1556000000	1922000000	1658800000	1056.78	951.022	996.804	219.641	1265.54	815.215	485.716	545.657	512.363
Rv0672|fadE8|Probable acyl-CoA dehydrogenase FadE8|542 AA	93954000	159440000	177690000	50909000	180840000	48937000	620740000	750270000	802810000	74.799	123.237	126.706	158.054	551.537	186.439	193.768	213.002	247.969
Rv1078|pra|Probable proline-rich antigen homolog Pra|240 AA	486540000	314660000	1717700000	711920000	84784000	140710000	2158200000	1315500000	1364400000	387.347	243.212	1224.84	2210.26	258.58	536.073	673.697	373.471	421.43
Rv0249c|Rv0249c|Probable succinate dehydrogenase [membrane anchor subunit] (succinic dehydrogenase)|273 AA	400200000	156220000	230790000	79178000	97821000	85038000	302920000	1314900000	861470000	318.609	120.748	164.57	245.819	298.341	323.975	94.559	373.301	266.087
Rv3722c|Rv3722c|Conserved protein|435 AA	1165900000	1357600000	2473300000	285190000	775260000	216390000	3435200000	3774700000	3854800000	928.202	1049.34	1763.64	885.412	2364.44	824.396	1072.32	1071.64	1190.65
Rv3262|fbiB|Probable F420 biosynthesis protein FbiB|448 AA	161710000	183150000	58813000	93148000	59477000	79025000	400500000	869490000	644250000	128.741	141.563	41.938	289.191	181.397	301.067	125.019	246.849	198.993
Rv0642c|mmaA4|Methoxy mycolic acid synthase 4 MmaA4 (methyl mycolic acid synthase 4) (MMA4) (hydroxy mycolic acid synthase)|301 AA	934060000	1511300000	2337000000	380610000	584180000	639890000	2971300000	4688000000	4685300000	743.629	1168.14	1666.45	1181.66	1781.67	2437.83	927.512	1330.93	1447.18
Rv2696c|Rv2696c|Conserved alanine and glycine and valine rich protein|259 AA	170150000	103170000	126280000	44454000	59619000	31814000	492040000	447600000	269620000	135.461	79.744	90.047	138.014	181.83	121.204	153.594	127.074	83.279
Rv3869|eccB1|ESX conserved component EccB1. ESX-1 type VII secretion system protein. Possible membrane protein.|480 AA	195540000	230190000	229360000	53464000	61623000	68140000	202920000	822140000	732960000	155.674	177.922	163.55	165.986	187.942	259.598	63.343	233.406	226.394
Rv3842c|glpQ1|Probable glycerophosphoryl diester phosphodiesterase GlpQ1 (glycerophosphodiester phosphodiesterase)|274 AA	0	54501000	29343000	14692000	126200000	7458700	231970000	307240000	209340000	0	42.126	20.924	45.613	384.893	28.416	72.411	87.226	64.66
Rv0126|treS|Trehalose synthase TreS|601 AA	570900000	326380000	496790000	97286000	40601000	64508000	448110000	687370000	429670000	454.508	252.271	354.247	302.038	123.827	245.761	139.881	195.145	132.715
Rv2579|dhaA|Possible haloalkane dehalogenase DhaA (1-chlorohexane halidohydrolase)|300 AA	186390000	484770000	277780000	280580000	109760000	68842000	1385200000	955690000	1094600000	148.39	374.697	198.077	871.1	334.753	262.272	432.4	271.321	338.095
Rv2172c|Rv2172c|Conserved protein|301 AA	297650000	427420000	309550000	120820000	117930000	49740000	608740000	998060000	823420000	236.967	330.369	220.732	375.103	359.67	189.498	190.022	283.35	254.334
Rv1908c|katG|Catalase-peroxidase-peroxynitritase T KatG|740 AA	12135000000	14660000000	18369000000	1449600000	1758500000	666780000	9388600000	13704000000	12596000000	9660.98	11331.3	13098.4	4500.49	5363.18	2540.28	2930.72	3890.57	3890.6
Rv0503c|cmaA2|Cyclopropane-fatty-acyl-phospholipid synthase 2 CmaA2 (cyclopropane fatty acid synthase) (CFA synthase) (cyclopropane mycolic acid synthase 2) (mycolic acid trans-cyclopropane synthetase)|302 AA	2364800000	2060900000	1639500000	764120000	501160000	760410000	2612600000	5564400000	4240100000	1882.68	1592.95	1169.08	2372.32	1528.47	2896.99	815.541	1579.74	1309.66
Rv0548c|menB|Naphthoate synthase MenB (dihydroxynaphthoic acid synthetase) (DHNA synthetase)|314 AA	320570000	326200000	458280000	97113000	235120000	237300000	1519500000	1714900000	1475300000	255.214	252.132	326.787	301.501	717.084	904.059	474.322	486.861	455.684
Rv0317c|glpQ2|Possible glycerophosphoryl diester phosphodiesterase GlpQ2 (glycerophosphodiester phosphodiesterase)|256 AA	131490000	25485000	227190000	11456000	71771000	43116000	227910000	344290000	367240000	104.683	19.698	162.003	35.567	218.892	164.262	71.144	97.744	113.432
Rv0231|fadE4|Probable acyl-CoA dehydrogenase FadE4|568 AA	1398100000	1240100000	2118700000	491610000	433920000	370040000	3705400000	3947200000	3698000000	1113.06	958.519	1510.79	1526.27	1323.4	1409.77	1156.67	1120.61	1142.22
Rv0462|lpdC|Dihydrolipoamide dehydrogenase LpdC (lipoamide reductase (NADH)) (lipoyl dehydrogenase) (dihydrolipoyl dehydrogenase) (diaphorase)|464 AA	2807300000	3436700000	3741300000	572320000	1812400000	220240000	6643600000	8688400000	7040700000	2234.96	2656.35	2667.82	1776.85	5527.57	839.064	2073.85	2466.64	2174.7
Rv1536|ileS|Isoleucyl-tRNA synthetase IleS|1041 AA	832870000	1067500000	1252300000	154720000	91439000	66210000	812150000	1003000000	793410000	663.069	825.11	892.98	480.35	278.876	252.245	253.518	284.752	245.065
Rv0456c|echA2|enoyl-CoA hydratase EchA2 (enoyl hydrase) (unsaturated acyl-CoA hydratase) (crotonase)|304 AA	145950000	0	148120000	38346000	9768200	9287500	208980000	82535000	149850000	116.194	0	105.62	119.051	29.792	35.383	65.235	23.432	46.285
Rv3244c|lpqB|Probable conserved lipoprotein LpqB|583 AA	317880000	451060000	120320000	31876000	133090000	28649000	532180000	548920000	441980000	253.072	348.641	85.797	98.963	405.906	109.146	166.124	155.839	136.517
Rv0237|lpqI|Probable conserved lipoprotein LpqI|388 AA	100560000	133390000	0	152300000	19999000	100980000	505840000	448890000	675330000	80.058	103.102	0	472.837	60.994	384.711	157.901	127.44	208.593
Rv0439c|Rv0439c|Probable dehydrogenase/reductase|311 AA	331430000	392050000	585090000	100160000	279580000	22140000	972710000	936490000	906190000	263.86	303.03	417.211	310.961	852.68	84.348	303.638	265.87	279.9
Rv0423c|thiC|Probable thiamine biosynthesis protein ThiC|547 AA	769440000	966380000	566060000	116250000	337560000	55982000	2131200000	1350700000	1003600000	612.571	746.951	403.642	360.914	1029.51	213.279	665.269	383.465	309.988
Rv0146|Rv0146|Possible S-adenosylmethionine-dependent methyltransferase|310 AA	561580000	505340000	518580000	134810000	403260000	192160000	2363100000	2370100000	1889200000	447.088	390.596	369.785	418.536	1229.89	732.086	737.658	672.873	583.528
Rv2982c|gpdA2|Probable glycerol-3-phosphate dehydrogenase [NAD(P)+] GpdA2 (NAD(P)H- dependent glycerol-3-phosphate dehydrogenase)|334 AA	171830000	128560000	599180000	14906000	27620000	75155000	181270000	419890000	264520000	136.798	99.369	427.259	46.278	84.237	286.323	56.585	119.207	81.704
Rv2476c|gdh|Probable NAD-dependent glutamate dehydrogenase Gdh (NAD-Gdh) (NAD-dependent glutamic dehydrogenase)|1624 AA	1961000000	4300500000	2032900000	1028700000	744900000	792860000	7652000000	7158800000	5737100000	1561.2	3324.02	1449.61	3193.74	2271.84	3020.61	2388.62	2032.39	1772.05
Rv2521|bcp|Probable bacterioferritin comigratory protein Bcp|157 AA	792230000	1013500000	935140000	135040000	132360000	169820000	1101600000	1446000000	1345300000	630.714	783.372	666.822	419.251	403.68	646.975	343.872	410.52	415.531
Rv1380|pyrB|Probable aspartate carbamoyltransferase PyrB (ATCase) (aspartate transcarbamylase)|319 AA	93121000	0	0	37982000	107220000	25845000	319410000	529350000	648080000	74.136	0	0	117.92	327.006	98.464	99.706	150.283	200.176
Rv1631|coaE|Probable dephospho-CoA kinase CoaE (dephosphocoenzyme a kinase)|407 AA	69626000	109430000	138660000	38162000	127310000	43280000	615120000	566630000	647290000	55.431	84.582	98.875	118.479	388.278	164.887	192.014	160.867	199.932
Rv3623|lpqG|Probable conserved lipoprotein LpqG|240 AA	393620000	323880000	510930000	206620000	280210000	81869000	1769900000	1834600000	1540900000	313.371	250.339	364.33	641.481	854.602	311.902	552.487	520.844	475.947
Rv2445c|ndkA|Probable nucleoside diphosphate kinase NdkA (NDK) (NDP kinase) (nucleoside-2-P kinase)|136 AA	266360000	538770000	429930000	200960000	99085000	100770000	1673300000	826240000	1252000000	212.056	416.435	306.571	623.908	302.196	383.911	522.332	234.57	386.712
Rv0931c|pknD|Transmembrane serine/threonine-protein kinase D PknD (protein kinase D) (STPK D)|664 AA	1852200000	2502800000	3299100000	1000300000	676880000	812250000	6454000000	7042700000	6617100000	1474.58	1934.51	2352.5	3105.57	2064.39	3094.49	2014.66	1999.43	2043.86
Rv1263|amiB2|Probable amidase AmiB2 (aminohydrolase)|462 AA	85746000	146100000	0	85014000	75032000	10596000	484830000	489530000	309620000	68.265	112.926	0	263.938	228.837	40.368	151.343	138.978	95.634
Rv1144|Rv1144|Probable short-chain type dehydrogenase/reductase|250 AA	160710000	192850000	389080000	99990000	46565000	171380000	448320000	978860000	976080000	127.945	149.061	277.442	310.433	142.017	652.919	139.946	277.899	301.487
Rv0282|eccA3|ESX conserved component EccA3. ESX-3 type VII secretion system protein.|631 AA	1066100000	916600000	2759400000	555940000	359060000	326890000	3377900000	3846400000	3668200000	848.749	708.474	1967.65	1725.99	1095.08	1245.38	1054.43	1091.99	1133.02
Rv2135c|Rv2135c|Conserved protein|236 AA	184490000	147060000	338390000	82470000	44174000	69296000	617690000	659780000	445180000	146.877	113.668	241.297	256.04	134.725	264.002	192.816	187.312	137.505
Rv1223|htrA|Probable serine protease HtrA (DEGP protein)|528 AA	1525800000	1911100000	1712600000	367210000	259110000	205680000	2476400000	2869000000	2127900000	1214.73	1477.16	1221.21	1140.06	790.25	783.594	773.025	814.511	657.257
Rv3791|dprE2|Decaprenylphosphoryl-D-2-keto erythro pentose reductase|254 AA	1047900000	392150000	303160000	40573000	124140000	24285000	287610000	683800000	693380000	834.26	303.107	216.175	125.965	378.61	92.52	89.779	194.131	214.168
Rv3747|Rv3747|Conserved protein|127 AA	0	0	158740000	188690000	318330000	201480000	2652800000	2026000000	2637100000	0	0	113.193	585.814	970.863	767.593	828.09	575.183	814.536
Rv1238|sugC|Probable sugar-transport ATP-binding protein ABC transporter SugC|393 AA	145830000	241290000	225380000	37822000	148490000	32055000	682020000	571210000	595400000	116.099	186.502	160.712	117.424	452.874	122.122	212.897	162.167	183.905
Rv3775|lipE|Probable lipase LipE|415 AA	195970000	232380000	134680000	54271000	106650000	25923000	694360000	576480000	445300000	156.017	179.615	96.037	168.492	325.268	98.761	216.749	163.663	137.542
Rv2140c|TB18.6|Conserved protein TB18.6|176 AA	4691300000	1768800000	1893000000	466430000	551030000	377850000	4280400000	5097600000	4363600000	3734.86	1367.17	1349.85	1448.1	1680.57	1439.52	1336.16	1447.21	1347.81
Rv2444c|rne|Possible ribonuclease E Rne|953 AA	1113500000	1554700000	2153700000	370460000	407450000	291840000	3459600000	3771600000	3043100000	886.485	1201.68	1535.74	1150.14	1242.67	1111.84	1079.94	1070.76	939.94
Rv3910|Rv3910|Probable conserved transmembrane protein|1184 AA	570190000	413070000	1046300000	412260000	25673000	359280000	1286900000	1146900000	1001000000	453.943	319.277	746.087	1279.92	78.299	1368.77	401.715	325.606	309.185
Rv2925c|rnc|Probable ribonuclease III Rnc (RNase III)|240 AA	124240000	204980000	144860000	22437000	36113000	18729000	348110000	334660000	138680000	98.911	158.437	103.296	69.659	110.14	71.353	108.665	95.01	42.835
Rv3871|eccCb1|ESX conserved component EccCb1. ESX-1 type VII secretion system protein.|591 AA	64022000	130970000	251130000	115160000	214890000	45045000	1160000000	1366300000	906520000	50.97	101.232	179.074	357.53	655.385	171.611	362.102	387.893	280.002
Rv0284|eccC3|ESX conserved component EccC3. ESX-3 type VII secretion system protein. Possible membrane protein.|1330 AA	1386200000	1723900000	2508200000	440770000	943450000	620450000	6125800000	7344100000	6667000000	1103.59	1332.47	1788.53	1368.43	2877.39	2363.77	1912.21	2084.99	2059.28
Rv0688|Rv0688|Putative ferredoxin reductase|406 AA	504810000	86589000	352180000	251930000	74400000	223020000	1313700000	1485200000	1359000000	401.892	66.928	251.13	782.152	226.91	849.655	410.081	421.649	419.762
Rv2984|ppk1|Polyphosphate kinase PPK (polyphosphoric acid kinase) (ATP-polyphosphate phosphotransferase)|742 AA	606890000	845330000	1003000000	181490000	102720000	52942000	753050000	1012100000	1302600000	483.16	653.387	715.211	563.461	313.282	201.697	235.07	287.336	402.342
Rv2294|Rv2294|Probable aminotransferase|407 AA	644030000	305810000	364400000	171320000	110530000	63920000	740420000	1161800000	1410500000	512.729	236.372	259.844	531.887	337.101	243.521	231.127	329.836	435.669
Rv3273|Rv3273|Probable transmembrane carbonic anhydrase (carbonate dehydratase) (carbonic dehydratase)|764 AA	450760000	1150100000	1166300000	550900000	50321000	177250000	1247500000	1407900000	1585900000	358.861	888.955	831.656	1710.35	153.472	675.282	389.416	399.704	489.846
Rv0244c|fadE5|Probable acyl-CoA dehydrogenase FadE5|611 AA	10300000000	1235900000	14141000000	583420000	812270000	1459100000	8004200000	8917800000	6717900000	8200.09	955.273	10083.6	1811.31	2477.31	5558.84	2498.57	2531.77	2075
Rv1871c|Rv1871c|Conserved protein|129 AA	791620000	923820000	664710000	272350000	64947000	182000000	1841600000	1060800000	1314900000	630.229	714.055	473.986	845.549	198.079	693.378	574.868	301.162	406.141
Rv2131c|cysQ|Monophosphatase CysQ|267 AA	328120000	269310000	672020000	84964000	155760000	167730000	1283100000	1114800000	1771300000	261.225	208.16	479.199	263.783	475.047	639.013	400.529	316.492	547.112
Rv3051c|nrdE|Ribonucleoside-diphosphate reductase (alpha chain) NrdE (ribonucleotide reductase small subunit) (R1F protein)|693 AA	1722500000	2147800000	2015900000	525900000	423700000	342270000	3850200000	6162700000	5960800000	1371.33	1660.11	1437.48	1632.73	1292.23	1303.97	1201.87	1749.6	1841.15
Rv3596c|clpC1|Probable ATP-dependent protease ATP-binding subunit ClpC1|848 AA	6843200000	5759300000	7268700000	2575900000	1498700000	1433600000	13606000000	17769000000	13249000000	5448.04	4451.58	5183.11	7997.24	4570.83	5461.69	4247.21	5044.63	4092.3
Rv0432|sodC|Periplasmic superoxide dismutase [Cu-Zn] SodC|240 AA	160540000	593630000	798490000	189170000	174610000	125170000	1755200000	1346500000	2211900000	127.81	458.839	569.381	587.305	532.536	476.869	547.898	382.272	683.202
Rv3580c|cysS1|Cysteinyl-tRNA synthetase 1 CysS1 (cysteine--tRNA ligase 1) (CYSRS 1) (cysteine translase)|469 AA	261600000	445040000	433960000	222370000	351280000	58538000	2091500000	2102100000	1717900000	208.266	343.988	309.445	690.379	1071.36	223.016	652.876	596.788	530.618
Rv0148|Rv0148|Probable short-chain type dehydrogenase/reductase|286 AA	3573900000	2755100000	2765700000	223920000	370640000	363270000	4589600000	3347800000	3974200000	2845.27	2129.52	1972.14	695.191	1130.4	1383.97	1432.67	950.443	1227.53
Rv3318|sdhA|Probable succinate dehydrogenase (flavoprotein subunit) SdhA (succinic dehydrogenase) (fumarate reductase) (fumarate dehydrogenase) (fumaric hydrogenase)|590 AA	162370000	472570000	394950000	64472000	274710000	22163000	853170000	943530000	930020000	129.267	365.267	281.628	200.162	837.828	84.436	266.323	267.869	287.261
Rv3148|nuoD|Probable NADH dehydrogenase I (chain D) NuoD (NADH-ubiquinone oxidoreductase chain D)|440 AA	539650000	655770000	428740000	65008000	76195000	107180000	735280000	944840000	765320000	429.629	506.869	305.723	201.826	232.384	408.331	229.523	268.241	236.389
Rv1449c|tkt|Transketolase Tkt (TK)|700 AA	2154100000	2013600000	2404900000	717270000	525330000	436200000	5148500000	6162400000	5121200000	1714.93	1556.39	1714.87	2226.86	1602.18	1661.82	1607.14	1749.51	1581.82
Rv3881c|espB|Secreted ESX-1 substrate protein B	645950000	1265200000	806950000	124450000	142720000	137690000	1305500000	1234700000	1759400000	514.257	977.92	575.414	386.372	435.276	524.567	407.521	350.532	543.436
Rv0946c|pgi|Probable glucose-6-phosphate isomerase Pgi (GPI) (phosphoglucose isomerase) (phosphohexose isomerase) (phi)|553 AA	542280000	747690000	1083000000	145010000	170220000	205440000	2372200000	1494800000	1785000000	431.723	577.917	772.257	450.204	519.148	782.679	740.499	424.375	551.343
Rv0470c|pcaA|Mycolic acid synthase PcaA (cyclopropane synthase)|287 AA	1082600000	981390000	1612000000	300010000	919530000	366270000	3524800000	5716400000	5461200000	861.885	758.553	1149.47	931.423	2804.44	1395.4	1100.29	1622.89	1686.83
Rv3490|otsA|Alpha	382800000	157350000	429150000	84093000	40712000	55038000	904620000	399160000	601590000	304.757	121.622	306.015	261.078	124.166	209.682	282.383	113.322	185.817
Rv2207|cobT|Probable nicotinate-nucleotide-dimethylbenzimidazol phosphoribosyltransferase CobT|361 AA	38992000	194770000	0	70220000	70923000	34216000	447190000	736130000	647740000	31.043	150.545	0	218.008	216.305	130.355	139.593	208.988	200.071
Rv0632c|echA3|Probable enoyl-CoA hydratase EchA3 (enoyl hydrase) (unsaturated acyl-CoA hydratase) (crotonase)|231 AA	377860000	825620000	918290000	120230000	7977000000	75948000	8022600000	8937300000	8883600000	300.824	638.152	654.807	373.271	24328.8	289.344	2504.31	2537.3	2743.93
Rv3520c|Rv3520c|Possible coenzyme F420-dependent oxidoreductase|347 AA	1400300000	1172600000	778890000	417730000	432710000	273580000	2111500000	4719800000	3807900000	1114.81	906.346	555.405	1296.9	1319.71	1042.28	659.119	1339.95	1176.17
Rv2246|kasB|3-oxoacyl-[acyl-carrier protein] synthase 2 KasB (beta-ketoacyl-ACP synthase) (KAS I)|438 AA	939620000	3131600000	2842500000	831140000	270360000	1410300000	4730400000	5655700000	5573800000	748.055	2420.53	2026.91	2580.39	824.561	5372.92	1476.63	1605.66	1721.61
Rv3800c|pks13|Polyketide synthase Pks13|1733 AA	5522700000	5684800000	7011900000	1848400000	2884200000	889520000	22995000000	22607000000	20397000000	4396.76	4393.99	4999.99	5738.62	8796.41	3388.87	7178.05	6418.14	6300.14
Rv2245|kasA|3-oxoacyl-[acyl-carrier protein] synthase 1 KasA (beta-ketoacyl-ACP synthase) (KAS I)|416 AA	3387400000	2442900000	5433000000	1435800000	764860000	1210700000	10100000000	7588600000	9224900000	2696.79	1888.21	3874.12	4457.64	2332.72	4612.49	3152.78	2154.41	2849.35
Rv2247|accD6|Acetyl/propionyl-CoA carboxylase (beta subunit) AccD6|473 AA	585420000	396060000	616430000	210430000	81790000	547830000	1628100000	1779200000	2288500000	466.068	306.129	439.559	653.309	249.448	2087.11	508.223	505.116	706.862
Rv0435c|Rv0435c|Putative conserved ATPase|728 AA	150470000	250480000	144100000	30945000	231250000	24924000	418920000	1030300000	783980000	119.793	193.605	102.754	96.073	705.281	94.955	130.769	292.503	242.152
Rv0684|fusA1|Probable elongation factor G FusA1 (EF-G)|701 AA	6658000000	2793400000	4493600000	929320000	1298700000	771130000	8984000000	13794000000	11603000000	5300.6	2159.12	3204.26	2885.2	3960.86	2937.83	2804.42	3916.13	3583.89
Rv0418|lpqL|Probable lipoprotein aminopeptidase LpqL|500 AA	334930000	580990000	822910000	73253000	227850000	186280000	1559500000	1793600000	1618900000	266.646	449.069	586.794	227.424	694.911	709.684	486.809	509.204	500.039
Rv0206c|mmpL3|Possible conserved transmembrane transport protein MmpL3|944 AA	1219300000	1730100000	972690000	182140000	92464000	304360000	2261800000	2114300000	926980000	970.715	1337.26	693.598	565.479	282.002	1159.54	706.037	600.251	286.322
Rv2987c|leuD|Probable 3-isopropylmalate dehydratase (small subunit) LeuD (isopropylmalate isomerase) (alpha-IPM isomerase) (IPMI)|198 AA	197030000	205370000	237680000	45905000	41001000	51778000	308520000	712150000	512240000	156.861	158.738	169.483	142.518	125.047	197.262	96.307	202.18	158.219
Rv2535c|pepQ|Probable cytoplasmic peptidase PepQ|372 AA	609150000	1062900000	1094100000	308650000	183380000	66083000	2351700000	1676300000	1598100000	484.96	821.555	780.172	958.247	559.284	251.761	734.099	475.903	493.614
Rv1611|trpC|Probable indole-3-glycerol phosphate synthase TrpC|272 AA	1506100000	1217600000	1707700000	676660000	416920000	788520000	3269600000	6131700000	3727900000	1199.04	941.128	1217.71	2100.79	1271.55	3004.08	1020.63	1740.79	1151.46
Rv3734c|tgs2|Putative triacylglycerol synthase (diacylglycerol acyltransferase) Tgs2|454 AA	1267600000	383170000	1435100000	263190000	244080000	234710000	4052300000	2459600000	2855600000	1009.17	296.166	1023.33	817.11	744.41	894.191	1264.95	698.282	882.026
Rv2229c|Rv2229c|Conserved protein|245 AA	451580000	970520000	651060000	131320000	155230000	21543000	1064200000	915010000	915060000	359.514	750.151	464.253	407.701	473.43	82.074	332.197	259.772	282.64
Rv1412|ribC|Probable riboflavin synthase alpha chain RibC (RibE)|201 AA	32503000	375510000	73929000	36922000	58786000	38549000	398190000	738510000	401790000	25.876	290.246	52.717	114.63	179.289	146.863	124.298	209.663	124.103
Rv0551c|fadD8|Probable fatty-acid-CoA ligase FadD8 (fatty-acid-CoA synthetase) (fatty-acid-CoA synthase)|571 AA	0	19030000	30702000	25036000	58938000	49669000	279590000	1683000000	187490000	0	14.709	21.893	77.728	179.753	189.228	87.276	477.805	57.911
Rv2590|fadD9|Probable fatty-acid-CoA ligase FadD9 (fatty-acid-CoA synthetase) (fatty-acid-CoA synthase)|1168 AA	424060000	291060000	228840000	72055000	104050000	45042000	642990000	988960000	839550000	337.605	224.971	163.179	223.705	317.338	171.6	200.714	280.766	259.317
Rv3215|entC|Probable isochorismate synthase EntC (isochorismate hydroxymutase) (enterochelin biosynthesis)|372 AA	233260000	209000000	313550000	44510000	41414000	57709000	463870000	772400000	371560000	185.704	161.544	223.584	138.188	126.307	219.858	144.8	219.285	114.766
Rv1521|fadD25|Probable fatty-acid-AMP ligase FadD25 (fatty-acid-AMP synthetase) (fatty-acid-AMP synthase)|583 AA	483470000	210510000	491450000	116920000	190120000	140060000	1630500000	1700600000	1816200000	384.903	162.711	350.439	362.994	579.84	533.597	508.972	482.801	560.98
Rv2426c|Rv2426c|Conserved hypothetical protein|291 AA	64094000	194140000	250620000	30252000	54669000	63072000	694390000	548130000	418030000	51.027	150.058	178.71	93.922	166.733	240.29	216.759	155.614	129.119
Rv0189c|ilvD|Probable dihydroxy-acid dehydratase IlvD (dad)|575 AA	737360000	769960000	102490000	274020000	138350000	218010000	1535500000	2348300000	2450300000	587.031	595.131	73.083	850.733	421.948	830.568	479.317	666.684	756.838
Rv2731|Rv2731|Conserved alanine and arginine rich protein|450 AA	494700000	406990000	660580000	81146000	198850000	39625000	939940000	1232100000	1127800000	393.843	314.578	471.041	251.929	606.465	150.962	293.409	349.794	348.35
Rv0798c|cfp29|29 KDa antigen CFP29|265 AA	28530000	49326000	154450000	39143000	129530000	38832000	1434700000	546870000	568730000	22.713	38.126	110.134	121.525	395.049	147.941	447.852	155.257	175.667
Rv1286|cysN|Probable bifunctional enzyme CysN/CysC: sulfate adenyltransferase (subunit 1) + adenylylsulfate kinase|614 AA	403980000	169690000	227110000	39175000	16295000	19676000	283560000	162930000	401500000	321.619	131.16	161.946	121.624	49.698	74.961	88.515	46.256	124.014
Rv3535c|hsaG|Probable acetaldehyde dehydrogenase (acetaldehyde dehydrogenase [acetylating])|303 AA	167690000	147940000	134920000	48017000	34405000	30835000	660050000	389970000	318220000	133.502	114.348	96.208	149.075	104.931	117.474	206.039	110.713	98.29
Rv0196|Rv0196|Possible transcriptional regulatory protein|194 AA	0	22719000	74767000	26965000	38443000	22487000	447930000	435580000	204020000	0	17.56	53.314	83.717	117.246	85.67	139.824	123.661	63.017
Rv3699|Rv3699|Conserved protein|233 AA	1370000000	1318200000	1397900000	262740000	60822000	394710000	1100700000	2035400000	2074200000	1090.69	1018.89	996.804	815.713	185.499	1503.76	343.591	577.851	640.67
Rv0705|rpsS|30S ribosomal protein S19 RpsS|93 AA	730310000	1865000000	1224300000	151210000	183970000	14706000	1057600000	1077600000	930010000	581.418	1441.53	873.014	469.453	561.083	56.026	330.137	305.931	287.258
Rv3205c|Rv3205c|Conserved protein|292 AA	254380000	433020000	544550000	71372000	172240000	124250000	1157600000	1527300000	1599200000	202.518	334.697	388.303	221.584	525.308	473.364	361.353	433.601	493.954
Rv0053|rpsF|30S ribosomal protein S6 RpsF|96 AA	88682000	0	2075800000	1398000000	92007000	3200500000	3045600000	5010300000	2996800000	70.602	0	1480.19	4340.29	280.609	12193.2	950.705	1422.43	925.639
Rv1872c|lldD2|Possible L-lactate dehydrogenase (cytochrome) LldD2|414 AA	8431100000	4483900000	8879100000	3659000000	1079600000	981290000	14686000000	17010000000	11443000000	6712.21	3465.77	6331.44	11359.9	3292.63	3738.49	4584.34	4829.15	3534.47
Rv3876|espI|ESX-1 secretion-associated protein EspI. Conserved proline and alanine rich protein.|666 AA	495400000	475390000	380050000	263120000	159390000	173060000	1762800000	2610200000	2147800000	394.4	367.447	271.003	816.893	486.118	659.319	550.27	741.037	663.403
Rv0724|sppA|Possible protease IV SppA (endopeptidase IV) (signal peptide peptidase)|623 AA	495410000	419440000	381960000	90821000	486350000	188410000	2464800000	2730600000	3280400000	394.408	324.201	272.365	281.966	1483.3	717.799	769.404	775.219	1013.24
Rv1308|atpA|Probable ATP synthase alpha chain AtpA|549 AA	22055000000	17107000000	19327000000	2922800000	2690100000	2201000000	26450000000	26232000000	25959000000	17558.5	13222.6	13781.5	9074.24	8204.43	8385.31	8256.55	7447.28	8018.11
Rv0154c|fadE2|Probable acyl-CoA dehydrogenase FadE2|403 AA	919730000	1259400000	716290000	68730000	128040000	108500000	994700000	1369000000	1240700000	732.22	973.437	510.766	213.382	390.504	413.36	310.503	388.66	383.222
Rv2580c|hisS|Probable histidyl-tRNA synthetase HisS (histidine--tRNA ligase) (HISRS) (histidine--translase)|423 AA	387920000	364240000	510650000	319890000	81405000	70135000	1693900000	1835800000	858710000	308.833	281.535	364.13	993.143	248.274	267.198	528.763	521.185	265.235
Rv2383c|mbtB|Phenyloxazoline synthase MbtB (phenyloxazoline synthetase)|1414 AA	0	0	0	14229000	215560000	9510500	553640000	270230000	747160000	0	0	0	44.176	657.428	36.233	172.823	76.718	230.78
Rv1821|secA2|Possible preprotein translocase ATPase SecA2|808 AA	2240200000	1932700000	983580000	225520000	312020000	231640000	2710200000	3427200000	3094100000	1783.48	1493.86	701.364	700.158	951.618	882.495	846.008	972.984	955.693
Rv2868c|gcpE|Probable GcpE protein|387 AA	83501000	774240000	718680000	249970000	173190000	98985000	1869200000	1971000000	2300800000	66.477	598.439	512.471	776.067	528.206	377.11	583.484	559.568	710.661
Rv0547c|Rv0547c|Possible oxidoreductase|294 AA	63750000	171320000	231810000	64810000	213880000	54926000	1380600000	1028600000	1521500000	50.753	132.42	165.297	201.212	652.305	209.255	430.964	292.02	469.954
Rv1699|pyrG|Probable CTP synthase PyrG|586 AA	446440000	908500000	673560000	95738000	31497000	107160000	999620000	778510000	574750000	355.422	702.213	480.297	297.232	96.062	408.255	312.038	221.019	177.526
Rv0271c|fadE6|Probable acyl-CoA dehydrogenase FadE6|731 AA	1578500000	1667200000	1557500000	248240000	237550000	352330000	2619900000	3338600000	3642600000	1256.68	1288.64	1110.61	770.696	724.495	1342.3	817.82	947.831	1125.11
Rv1437|pgk|Probable phosphoglycerate kinase Pgk|412 AA	1085000000	1692900000	1311700000	589180000	227800000	176860000	3431700000	3763700000	2838100000	863.796	1308.51	935.337	1829.19	694.759	673.796	1071.23	1068.52	876.62
Rv0183|Rv0183|Possible lysophospholipase|279 AA	778040000	588940000	1217700000	593750000	115500000	350040000	2391600000	3186700000	3104400000	619.417	455.214	868.308	1843.38	352.259	1333.57	746.555	904.706	958.874
Rv1327c|glgE|Probable glucanase GlgE|701 AA	321100000	689300000	588050000	47544000	38354000	35537000	486210000	612230000	403750000	255.636	532.785	419.322	147.607	116.974	135.388	151.774	173.812	124.709
Rv1240|mdh|Probable malate dehydrogenase Mdh|329 AA	2671000000	4400400000	5388700000	851940000	835590000	584360000	13661000000	8689700000	5221900000	2126.45	3401.23	3842.53	2644.97	2548.43	2226.28	4264.38	2467.01	1612.92
Rv2890c|rpsB|30S ribosomal protein S2 RpsB|287 AA	1065400000	2383300000	1604000000	335580000	546510000	498520000	5106300000	6234100000	6346500000	848.192	1842.14	1143.77	1041.86	1666.78	1899.25	1593.97	1769.87	1960.28
Rv2680|Rv2680|Conserved protein|210 AA	110240000	124830000	132960000	3407900	145230000	93574000	390550000	634780000	508200000	87.765	96.486	94.81	10.58	442.931	356.496	121.913	180.214	156.971
Rv3879c|espK|ESX-1 secretion-associated protein EspK. Alanine and proline rich protein.|729 AA	307900000	251560000	309290000	52653000	200350000	94698000	1194000000	1725300000	1230700000	245.127	194.44	220.546	163.469	611.04	360.778	372.715	489.814	380.133
Rv0667|rpoB|DNA-directed RNA polymerase (beta chain) RpoB (transcriptase beta chain) (RNA polymerase beta subunit)|1172 AA	7986600000	8135700000	10518000000	1735300000	1659300000	1532100000	18989000000	20082000000	17534000000	6358.33	6288.38	7500.09	5387.48	5060.64	5836.95	5927.55	5701.29	5415.83
Rv2411c|Rv2411c|Conserved hypothetical protein|551 AA	173140000	276920000	944420000	160180000	81070000	105440000	1289800000	1633200000	1161600000	137.841	214.042	673.44	497.301	247.252	401.702	402.62	463.667	358.79
Rv1328|glgP|Probable glycogen phosphorylase GlgP|863 AA	1466100000	2065900000	2910400000	1329800000	473040000	625070000	9360000000	7028300000	6184100000	1167.2	1596.81	2075.32	4128.55	1442.71	2381.37	2921.79	1995.34	1910.12
Rv1475c|acn|Probable iron-regulated aconitate hydratase Acn (citrate hydro-lyase) (aconitase)|943 AA	4258300000	3692600000	9906600000	975650000	1134400000	841160000	11155000000	13264000000	13609000000	3390.14	2854.15	7064.12	3029.04	3459.76	3204.63	3482.11	3765.66	4203.49
Rv0853c|pdc|Probable pyruvate or indole-3-pyruvate decarboxylase Pdc|560 AA	229430000	102410000	308580000	31284000	53844000	24392000	572360000	397180000	500170000	182.655	79.156	220.04	97.126	164.217	92.928	178.666	112.76	154.49
Rv3808c|glfT2|Bifunctional UDP-galactofuranosyl transferase GlfT2|637 AA	278540000	237260000	302150000	76203000	91634000	67144000	957410000	1367700000	795950000	221.753	183.387	215.455	236.583	279.471	255.803	298.862	388.291	245.85
Rv1001|arcA|Probable arginine deiminase ArcA (adi) (ad) (arginine dihydrolase)|402 AA	877730000	663160000	533360000	138700000	92902000	57368000	1078900000	1154200000	1453400000	698.783	512.581	380.324	430.614	283.338	218.559	336.786	327.678	448.92
Rv0576|Rv0576|Probable transcriptional regulatory protein (possibly ArsR-family)|434 AA	233630000	489250000	343940000	78232000	122200000	149640000	1370400000	1776500000	1259500000	185.999	378.159	245.254	242.882	372.693	570.094	427.78	504.35	389.029
Rv2204c|Rv2204c|Conserved protein|118 AA	1037500000	3248700000	1734400000	258110000	382660000	353370000	4201900000	5842900000	4282900000	825.98	2511.04	1236.75	801.339	1167.06	1346.26	1311.65	1658.8	1322.88
Rv0670|end|Probable endonuclease IV End (endodeoxyribonuclease IV) (apurinase)|252 AA	836380000	574990000	586110000	275810000	24424000	105310000	1375600000	1045700000	759420000	665.863	444.431	417.939	856.291	74.49	401.207	429.403	296.875	234.566
Rv1731|gabD2|Possible succinate-semialdehyde dehydrogenase [NADP+] dependent (SSDH) GabD2|518 AA	159660000	1723200000	1147500000	28796000	403920000	143400000	1824200000	2052600000	1658500000	127.109	1331.92	818.25	89.401	1231.9	546.321	569.437	582.734	512.27
Rv0577|TB27.3|Conserved protein TB27.3|261 AA	445640000	734480000	605830000	264460000	143980000	50650000	1601100000	1893100000	1738600000	354.785	567.707	432.001	821.053	439.119	192.965	499.794	537.452	537.011
Rv2606c|snzP|Possible pyridoxine biosynthesis protein SnzP|299 AA	864760000	700160000	1808700000	416500000	170170000	607960000	4352500000	4314500000	2824100000	688.457	541.18	1289.73	1293.08	518.995	2316.19	1358.66	1224.89	872.296
Rv2534c|efp|Probable elongation factor P Efp|187 AA	1450900000	1355900000	1081800000	48786000	86004000	26825000	1112900000	609870000	557600000	1155.1	1048.03	771.402	151.463	262.3	102.197	347.399	173.142	172.229
Rv0383c|Rv0383c|Possible conserved secreted protein|284 AA	334560000	586360000	523900000	113220000	83183000	116800000	1448300000	1581800000	1044900000	266.352	453.219	373.579	351.507	253.697	444.981	452.097	449.074	322.744
Rv1658|argG|Probable argininosuccinate synthase ArgG|398 AA	553740000	397490000	885790000	54465000	177720000	56954000	865180000	1514600000	1302300000	440.846	307.235	631.632	169.094	542.022	216.982	270.072	429.996	402.249
Rv0957|purH|Probable bifunctional purine biosynthesis protein PurH: phosphoribosylaminoimidazolecarboxamide formyltransferase (AICAR transformylase) (5-phosphoribosyl-5-aminoimidazole-4-carboxamide formyltransferase) + inosinemonophosphate cyclohydrolase	733840000	201620000	284540000	37269000	195210000	72092000	1467000000	1151700000	1133200000	584.229	155.84	202.898	115.707	595.364	274.654	457.934	326.968	350.018
Rv3283|sseA|Probable thiosulfate sulfurtransferase SseA (rhodanese) (thiosulfate cyanide transsulfurase) (thiosulfate thiotransferase)|297 AA	970170000	1894200000	1093200000	260750000	226080000	509610000	2781500000	4149000000	4049600000	772.377	1464.1	779.531	809.535	689.513	1941.5	868.265	1177.9	1250.82
Rv0668|rpoC|DNA-directed RNA polymerase (beta chain) RpoC (transcriptase beta chain) (RNA polymerase beta subunit).|1316 AA	5509300000	9579600000	9867700000	2398800000	2672800000	2490500000	30019000000	31916000000	27442000000	4386.09	7404.43	7036.38	7447.41	8151.67	9488.23	9370.64	9060.97	8476.17
Rv1077|cbs|Probable cystathionine beta-synthase Cbs (serine sulfhydrase) (beta-thionase) (hemoprotein H-450)|464 AA	741610000	1274100000	1214200000	537080000	64445000	245300000	1849600000	2738900000	2105900000	590.414	984.799	865.812	1667.44	196.548	934.537	577.365	777.576	650.461
Rv0247c|Rv0247c|Probable succinate dehydrogenase [iron-sulfur subunit] (succinic dehydrogenase)|248 AA	452650000	455230000	1408400000	111330000	249930000	751160000	4930900000	3791400000	3990700000	360.366	351.864	1004.29	345.64	762.252	2861.75	1539.21	1076.38	1232.63
Rv1511|gmdA|GDP-D-mannose dehydratase GmdA (GDP-mannose 4	1125600000	646180000	1159800000	114510000	314850000	49263000	2512600000	1869200000	1778900000	896.119	499.456	827.021	355.512	960.249	187.681	784.326	530.667	549.459
Rv0801|Rv0801|Conserved protein|115 AA	906900000	200770000	459810000	51526000	93986000	77043000	1074300000	966800000	1094300000	722.006	155.183	327.878	159.97	286.644	293.516	335.35	274.475	338.003
Rv2145c|wag31|Diviva family protein Wag31|260 AA	3526500000	3306900000	4875200000	1054000000	1907800000	1069300000	20951000000	20434000000	17404000000	2807.53	2556.03	3476.37	3272.29	5818.53	4073.79	6540	5801.23	5375.67
Rv2555c|alaS|Probable alanyl-tRNA synthetase AlaS (alanine--tRNA ligase) (alanine translase) (ALARS)|904 AA	1243400000	1321200000	1639300000	454230000	455780000	393250000	5811600000	6112900000	5497400000	989.902	1021.2	1168.94	1410.22	1390.07	1498.19	1814.13	1735.46	1698.01
Rv3094c|Rv3094c|Conserved hypothetical protein|376 AA	459160000	596660000	680080000	184650000	178140000	168610000	1403100000	3298300000	2501000000	365.549	461.181	484.946	573.272	543.302	642.365	437.987	936.39	772.498
Rv0005|gyrB|DNA gyrase (subunit B) GyrB (DNA topoisomerase (ATP-hydrolysing)) (DNA topoisomerase II) (type II DNA topoisomerase)|675 AA	1811900000	2170200000	1556400000	192440000	597800000	113120000	5330000000	4212600000	3613300000	1442.5	1677.43	1109.83	597.457	1823.21	430.961	1663.8	1195.96	1116.06
Rv3139|fadE24|Probable acyl-CoA dehydrogenase FadE24|468 AA	731140000	1586700000	3208700000	107090000	1289100000	269230000	5825700000	5336400000	4612600000	582.079	1226.42	2288.03	332.476	3931.58	1025.7	1818.53	1515.01	1424.72
Rv1543|Rv1543|Possible fatty acyl-CoA reductase|341 AA	1049600000	1465000000	815880000	403260000	222540000	448600000	4047600000	4644100000	3851800000	835.613	1132.35	581.781	1251.98	678.716	1709.06	1263.49	1318.46	1189.73
Rv2258c|Rv2258c|Possible transcriptional regulatory protein|353 AA	384230000	589380000	1570600000	188740000	58724000	129260000	900520000	1838100000	1808000000	305.895	455.554	1119.95	585.97	179.1	492.451	281.104	521.838	558.447
Rv1294|thrA|Probable homoserine dehydrogenase ThrA|441 AA	1027300000	1310400000	1886200000	201020000	127880000	196500000	1551600000	2868200000	2572600000	817.859	1012.86	1345	624.095	390.016	748.62	484.343	814.284	794.614
Rv2195|qcrA|Probable rieske iron-sulfur protein QcrA|429 AA	1437000000	911780000	2404500000	97883000	469590000	466430000	4658700000	4930600000	4101300000	1144.03	704.748	1714.58	303.891	1432.18	1776.99	1454.25	1399.8	1266.79
Rv0466|Rv0466|Conserved protein|264 AA	712690000	1226400000	1913800000	312370000	254040000	149090000	4458700000	3636900000	3147300000	567.39	947.93	1364.68	969.796	774.787	567.999	1391.81	1032.52	972.125
Rv1623c|cydA|Probable integral membrane cytochrome D ubiquinol oxidase (subunit I) CydA (cytochrome BD-I oxidase subunit I)|485 AA	416170000	328780000	490130000	32128000	58686000	24094000	770780000	490460000	514360000	331.323	254.126	349.498	99.746	178.984	91.793	240.604	139.242	158.873
Rv0182c|sigG|Probable alternative RNA polymerase sigma factor SigG (RNA polymerase ECF type sigma factor)|370 AA	0	0	85325000	19129000	29938000	11551000	246470000	312440000	337400000	0	0	60.843	59.389	91.307	44.007	76.937	88.702	104.215
Rv1837c|glcB|Malate synthase G GlcB|741 AA	5558700000	9377200000	11140000000	1286200000	1023400000	805020000	13867000000	13266000000	15569000000	4425.42	7247.98	7943.62	3993.19	3121.23	3066.94	4328.68	3766.23	4808.89
Rv1248c|Rv1248c|Multifunctional alpha-ketoglutarate metabolic enzyme|1231 AA	3786000000	3307900000	3435000000	448700000	626220000	433790000	7576400000	7254500000	7560600000	3014.13	2556.8	2449.4	1393.05	1909.88	1652.64	2365.03	2059.56	2335.29
Rv2927c|Rv2927c|Conserved hypothetical protein|245 AA	262180000	422790000	528960000	166860000	228940000	142620000	3948200000	3233700000	1703000000	208.728	326.79	377.187	518.04	698.235	543.35	1232.46	918.05	526.015
Rv0973c|accA2|Probable acetyl-/propionyl-coenzyme A carboxylase alpha chain (alpha subunit) AccA2: biotin carboxylase + biotin carboxyl carrier protein (BCCP)|667 AA	0	40253000	0	71974000	5029500	73172000	334910000	463000000	349450000	0	31.113	0	223.453	15.339	278.769	104.544	131.446	107.937
Rv0733|adk|Adenylate kinase Adk (ATP-AMP transphosphorylase)|181 AA	2708000000	2422500000	3048000000	895200000	223530000	1035200000	6677900000	4989100000	4541300000	2155.91	1872.44	2173.44	2779.27	681.736	3943.88	2084.55	1416.41	1402.7
Rv3718c|Rv3718c|Conserved protein|147 AA	419550000	0	1011100000	97681000	195130000	79955000	3099300000	2243200000	1108200000	334.014	0	720.987	303.264	595.12	304.61	967.468	636.846	342.296
Rv2540c|aroF|Probable chorismate synthase AroF (5-enolpyruvylshikimate-3-phosphate phospholyase)|401 AA	230030000	206270000	320960000	61559000	67559000	94634000	909440000	1234800000	1253900000	183.133	159.434	228.868	191.119	206.046	360.534	283.888	350.561	387.299
Rv3917c|parB|Probable chromosome partitioning protein ParB|344 AA	334270000	319510000	153480000	138700000	85937000	78131000	1297000000	1698400000	1557800000	266.121	246.961	109.442	430.614	262.096	297.661	404.868	482.177	481.167
Rv2380c|mbtE|Peptide synthetase MbtE (peptide synthase)|1682 AA	0	0	0	17719000	39299000	29152000	506060000	352870000	551770000	0	0	0	55.011	119.857	111.062	157.97	100.18	170.428
Rv2783c|gpsI|Bifunctional protein polyribonucleotide nucleotidyltransferase GpsI: guanosine pentaphosphate synthetase + polyribonucleotide nucleotidyltransferase (polynucleotide phosphorylase) (pnpase)|752 AA	2146100000	2314600000	1981700000	1001900000	1073500000	316340000	10366000000	16530000000	12396000000	1708.56	1789.04	1413.1	3110.54	3274.03	1205.18	3235.82	4692.88	3828.82
Rv3719|Rv3719|Conserved protein|470 AA	236690000	178190000	267170000	41566000	70265000	45473000	1065500000	1021400000	578820000	188.435	137.73	190.512	129.047	214.299	173.242	332.603	289.976	178.783
Rv3003c|ilvB1|Acetolactate synthase (large subunit) IlvB1 (acetohydroxy-acid synthase)|618 AA	451170000	542990000	277140000	289330000	112870000	104600000	2897200000	2364500000	2141100000	359.188	419.697	197.621	898.265	344.238	398.502	904.381	671.283	661.334
Rv0046c|ino1|myo-inositol-1-phosphate synthase Ino1 (inositol 1-phosphate synthetase) (D-glucose 6-phosphate cycloaldolase) (glucose 6-phosphate cyclase) (glucocycloaldolase)|367 AA	1257000000	727820000	562150000	109310000	599140000	110940000	3605400000	4217800000	3533100000	1000.73	562.559	400.854	339.368	1827.29	422.656	1125.45	1197.44	1091.29
Rv3920c|Rv3920c|Conserved protein similar to jag protein|187 AA	536040000	699970000	151600000	162260000	150040000	108610000	2072200000	2576500000	2426900000	426.755	541.033	108.102	503.759	457.601	413.779	646.852	731.47	749.611
Rv0384c|clpB|Probable endopeptidase ATP binding protein (chain B) ClpB (ClpB protein) (heat shock protein F84.1)|848 AA	3036600000	1423800000	2765500000	567120000	643450000	845790000	8806900000	12326000000	12362000000	2417.51	1100.51	1972	1760.7	1962.43	3222.27	2749.14	3499.36	3818.32
Rv1982A|vapB36|Possible antitoxin VapB36|86 AA	0	0	0	25564000	36099000	14105000	1749500000	932710000	48557000	0	0	0	79.367	110.097	53.737	546.119	264.797	14.998
Rv0036c|Rv0036c|Conserved protein|257 AA	1378700000	1957500000	2659500000	312410000	208140000	51816000	2411200000	3104500000	2785600000	1097.62	1513.02	1896.42	969.921	634.798	197.407	752.673	881.37	860.404
Rv0175|Rv0175|Probable conserved Mce associated membrane protein|213 AA	341510000	339820000	190690000	43927000	66911000	49655000	1074600000	1106000000	710320000	271.885	262.659	135.976	136.378	204.069	189.174	335.444	313.994	219.401
Rv1093|glyA1|Serine hydroxymethyltransferase 1 GlyA1|426 AA	2228300000	1327400000	4057900000	312390000	385400000	433920000	6403600000	5207900000	5314300000	1774.01	1026	2893.58	969.858	1175.42	1653.14	1998.93	1478.53	1641.46
Rv1323|fadA4|Probable acetyl-CoA acetyltransferase FadA4 (acetoacetyl-CoA thiolase)|389 AA	1040200000	1180600000	790850000	175090000	320110000	55041000	3514000000	3774700000	1705500000	828.129	912.529	563.933	543.591	976.291	209.694	1096.92	1071.64	526.788
Rv0803|purL|Phosphoribosylformylglycinamidine synthase II PurL (FGAM synthase II)|754 AA	450650000	752480000	428480000	183180000	109860000	160050000	3621200000	2249600000	2516200000	358.774	581.62	305.537	568.708	335.058	609.754	1130.38	638.663	777.193
Rv1415|ribA2|Probable riboflavin biosynthesis protein RibA2 : GTP cyclohydrolase II + 3	259160000	160750000	243610000	35626000	281290000	14341000	1589800000	1072200000	1008900000	206.324	124.25	173.712	110.606	857.896	54.636	496.267	304.398	311.625
Rv2940c|mas|Probable multifunctional mycocerosic acid synthase membrane-associated Mas|2111 AA	2285300000	2090000000	1390600000	1157200000	459770000	876880000	10239000000	13694000000	10561000000	1819.38	1615.44	991.598	3592.69	1402.23	3340.71	3196.18	3887.74	3262.04
Rv0934|pstS1|Periplasmic phosphate-binding lipoprotein PstS1 (PBP-1) (PstS1)|374 AA	4766000000	5736300000	4783500000	143500000	895220000	59938000	4188400000	5045100000	4226800000	3794.33	4433.8	3410.98	445.516	2730.3	228.35	1307.44	1432.31	1305.56
Rv0730|Rv0730|GCN5-related N-acetyltransferase|242 AA	671630000	831420000	1456700000	116310000	52727000	240410000	1351800000	2302000000	1681000000	534.702	642.635	1038.73	361.101	160.81	915.907	421.974	653.539	519.22
Rv3311|Rv3311|Conserved protein|420 AA	358820000	653170000	1080900000	264270000	22745000	330500000	1453000000	1577300000	2506300000	285.666	504.859	770.76	820.463	69.369	1259.13	453.564	447.797	774.135
Rv3721c|dnaZX|DNA polymerase III (subunit gamma/tau) DnaZ/X|578 AA	406730000	286600000	659120000	30979000	206510000	181240000	1739600000	2208400000	2163800000	323.808	221.524	470	96.179	629.827	690.483	543.028	626.966	668.345
Rv3224|Rv3224|Possible iron-regulated short-chain dehydrogenase/reductase|282 AA	758600000	709160000	2661600000	677240000	307550000	446700000	6469600000	8739900000	7723300000	603.941	548.136	1897.91	2102.59	937.985	1701.83	2019.53	2481.26	2385.54
Rv3628|ppa|Inorganic pyrophosphatase Ppa (pyrophosphate phospho-hydrolase) (PPASE) (inorganic diphosphatase) (diphosphate phospho-hydrolase)|162 AA	2370500000	2872400000	2153300000	169700000	243590000	114670000	8286000000	3766100000	3152000000	1887.21	2220.18	1535.46	526.857	742.916	436.866	2586.53	1069.2	973.576
Rv2220|glnA1|Glutamine synthetase GlnA1 (glutamine synthase) (GS-I)|478 AA	9437700000	13684000000	8383400000	699330000	1542400000	590890000	19210000000	17770000000	17375000000	7513.59	10576.9	5977.97	2171.17	4704.11	2251.16	5996.53	5044.91	5366.72
Rv3206c|moeB1|Probable molybdenum cofactor biosynthesis protein MoeB1 (MPT-synthase sulfurylase) (molybdopterin synthase sulphurylase)|392 AA	154610000	114500000	271580000	62601000	92519000	136930000	1827300000	1792800000	1479700000	123.089	88.501	193.656	194.354	282.17	521.672	570.404	508.977	457.043
Rv0580c|Rv0580c|Conserved protein|163 AA	937260000	284890000	481960000	60124000	227220000	199270000	2714500000	2574300000	3325100000	746.176	220.202	343.672	186.663	692.99	759.173	847.35	730.845	1027.04
Rv1447c|zwf2|Probable glucose-6-phosphate 1-dehydrogenase Zwf2 (G6PD)|514 AA	45373000	32632000	120760000	28656000	25304000	20389000	559230000	531860000	329960000	36.123	25.222	86.111	88.967	77.174	77.677	174.568	150.995	101.917
Rv1467c|fadE15|Probable acyl-CoA dehydrogenase FadE15|609 AA	376000000	389550000	673910000	407630000	13596000	278690000	1395500000	1663500000	1682100000	299.343	301.098	480.546	1265.54	41.466	1061.74	435.615	472.269	519.56
Rv0147|Rv0147|Probable aldehyde dehydrogenase (NAD+) dependent|506 AA	842470000	910270000	480960000	282150000	110010000	236280000	2909000000	3599400000	3140300000	670.712	703.581	342.959	875.974	335.515	900.173	908.065	1021.87	969.963
Rv3196A|Rv3196A|Unknown protein|66 AA	26517000	34518000	0	61598000	36529000	23615000	772380000	587960000	869770000	21.111	26.68	0	191.24	111.408	89.968	241.104	166.922	268.651
Rv3457c|rpoA|Probable DNA-directed RNA polymerase (alpha chain) RpoA (transcriptase alpha chain) (RNA polymerase alpha subunit) (DNA-directed RNA nucleotidyltransferase)|347 AA	7665000000	7119800000	5798900000	487180000	2019600000	626290000	18521000000	21990000000	21651000000	6102.3	5503.16	4135.03	1512.52	6159.5	2386.02	5781.46	6242.98	6687.47
Rv1297|rho|Probable transcription termination factor Rho homolog|602 AA	1334800000	1111600000	800500000	680310000	875430000	58447000	8174300000	8711100000	7139200000	1062.67	859.197	570.814	2112.12	2669.94	222.67	2551.66	2473.09	2205.13
Rv0157|pntB|Probable NAD(P) transhydrogenase (subunit beta) PntB [integral membrane protein] (pyridine nucleotide transhydrogenase subunit beta) (nicotinamide nucleotide transhydrogenase subunit beta)|475 AA	641470000	265350000	323650000	75357000	138010000	158680000	2046900000	2606700000	2209600000	510.69	205.099	230.786	233.956	420.911	604.534	638.954	740.044	682.492
Rv1484|inhA|NADH-dependent enoyl-[acyl-carrier-protein] reductase InhA (NADH-dependent enoyl-ACP reductase)|269 AA	1629500000	1528700000	2578500000	197760000	192600000	38932000	1906500000	3175600000	2084700000	1297.29	1181.59	1838.66	613.974	587.403	148.322	595.127	901.555	643.913
Rv3793|embC|Integral membrane indolylacetylinositol arabinosyltransferase EmbC (arabinosylindolylacetylinositol synthase)|1094 AA	322810000	82255000	113840000	58565000	30052000	37152000	591530000	947800000	837810000	256.997	63.578	81.176	181.823	91.654	141.541	184.65	269.081	258.779
Rv3153|nuoI|Probable NADH dehydrogenase I (chain I) NuoI (NADH-ubiquinone oxidoreductase chain I)|211 AA	227370000	117230000	451360000	195580000	25473000	31088000	991130000	1010600000	1125700000	181.015	90.611	321.852	607.205	77.689	118.438	309.388	286.91	347.701
Rv0859|fadA|Possible acyl-CoA thiolase FadA|403 AA	3129700000	2534800000	2493300000	553830000	203260000	341490000	6128100000	6811500000	5370500000	2491.63	1959.24	1777.9	1719.44	619.915	1301	1912.93	1933.79	1658.82
Rv0639|nusG|Probable transcription antitermination protein NusG|238 AA	1635200000	1501500000	1702200000	928430000	120490000	683360000	6352800000	5093000000	5291100000	1301.82	1160.57	1213.79	2882.44	367.478	2603.45	1983.07	1445.91	1634.29
Rv2280|Rv2280|Probable dehydrogenase|459 AA	2599000000	3018600000	2886800000	197960000	47972000	822310000	3639700000	3071400000	3841200000	2069.13	2333.19	2058.5	614.594	146.308	3132.81	1136.16	871.972	1186.45
Rv0524|hemL|Probable glutamate-1-semialdehyde 2	106310000	639700000	1191400000	79363000	239340000	16940000	1216100000	1939700000	2056500000	84.636	494.448	849.554	246.394	729.954	64.538	379.614	550.682	635.203
Rv1023|eno|Probable enolase Eno|429 AA	3096900000	4396100000	3769700000	160080000	1140300000	144420000	6951000000	9172100000	8795100000	2465.52	3397.91	2688.07	496.991	3477.76	550.207	2169.8	2603.97	2716.59
Rv0352|dnaJ1|Probable chaperone protein DnaJ1|395 AA	618550000	622180000	1135100000	192610000	69106000	187510000	2214600000	2712600000	2872900000	492.443	480.906	809.408	597.985	210.764	714.37	691.303	770.109	887.369
Rv0242c|fabG4|Probable 3-oxoacyl-[acyl-carrier protein] reductase FabG4 (3-ketoacyl-acyl carrier protein reductase)|454 AA	8531700000	6579000000	13087000000	946340000	916070000	592090000	14842000000	18505000000	18634000000	6792.3	5085.15	9331.98	2938.05	2793.89	2255.73	4633.03	5253.58	5755.59
Rv1161|narG|Respiratory nitrate reductase (alpha chain) NarG|1232 AA	105050000	534300000	530700000	19160000	32985000	99449000	1032000000	735210000	768390000	83.633	412.98	378.427	59.485	100.6	378.878	322.146	208.727	237.337
Rv1018c|glmU|Probable UDP-N-acetylglucosamine pyrophosphorylase GlmU|495 AA	275090000	348370000	271860000	53552000	64718000	19318000	572390000	1050300000	1278100000	219.006	269.268	193.856	166.26	197.381	73.597	178.676	298.181	394.774
Rv3720|Rv3720|Possible fatty acid synthase|420 AA	862680000	1134900000	1291300000	147460000	108540000	447330000	3390300000	3889100000	3845100000	686.801	877.206	920.79	457.81	331.032	1704.22	1058.31	1104.12	1187.66
Rv1411c|lprG|Conserved lipoprotein LprG|236 AA	2251600000	1016400000	1712700000	139790000	170130000	77161000	3800000000	2881500000	2507200000	1792.56	785.613	1221.28	433.998	518.873	293.966	1186.2	818.06	774.413
Rv3854c|ethA|Monooxygenase EthA|489 AA	46588000	32883000	295050000	54350000	58417000	27769000	872470000	1406400000	815800000	37.09	25.416	210.392	168.737	178.164	105.794	272.348	399.278	251.981
Rv2214c|ephD|Possible short-chain dehydrogenase EphD|592 AA	1368100000	1190700000	894190000	165420000	74263000	21271000	910510000	1577500000	2150700000	1089.18	920.336	637.622	513.57	226.492	81.038	284.222	447.853	664.299
Rv1191|Rv1191|Conserved protein|304 AA	325040000	251600000	456510000	143180000	83640000	37692000	1766000000	2031700000	1500700000	258.773	194.471	325.525	444.522	255.09	143.598	551.269	576.801	463.53
Rv0860|fadB|Probable fatty oxidation protein FadB|720 AA	4777900000	6433600000	10646000000	135550000	1405500000	1303700000	14232000000	18217000000	16333000000	3803.81	4972.77	7591.37	420.834	4286.58	4966.8	4442.62	5171.82	5044.87
Rv3075c|Rv3075c|Conserved protein|307 AA	981700000	949610000	1513400000	192420000	58422000	194060000	2051200000	3080300000	2429200000	781.556	733.989	1079.16	597.395	178.179	739.324	640.296	874.499	750.321
Rv3002c|ilvN|Probable acetolactate synthase (small subunit) IlvN (acetohydroxy-acid synthase) (AHAS) (ALS)|168 AA	512380000	0	267150000	50278000	126020000	108350000	2611000000	2619900000	1253500000	407.919	0	190.497	156.095	384.344	412.789	815.042	743.791	387.176
Rv1074c|fadA3|Probable beta-ketoacyl CoA thiolase FadA3|405 AA	3577900000	6086800000	4409600000	610220000	371850000	655110000	10469000000	9416900000	11043000000	2848.46	4704.71	3144.36	1894.51	1134.09	2495.82	3267.97	2673.46	3410.91
Rv1448c|tal|Probable transaldolase Tal|373 AA	996040000	1559600000	1721600000	111580000	456300000	117230000	3980700000	5869900000	4706600000	792.973	1205.47	1227.62	346.416	1391.65	446.619	1242.6	1666.47	1453.76
Rv3875|esxA|6 kDa early secretory antigenic target EsxA (ESAT-6)|95 AA	1549500000	1506600000	1111600000	137800000	37061000	136570000	1602700000	2085400000	1656600000	1233.6	1164.51	792.651	427.819	113.031	520.3	500.294	592.046	511.684
Rv2992c|gltS|Glutamyl-tRNA synthetase GltS (glutamate--tRNA ligase) (glutamyl-tRNA synthase) (GLURS)|490 AA	717160000	309710000	1415600000	89849000	140620000	116840000	2125800000	3326600000	2266900000	570.949	239.386	1009.42	278.949	428.872	445.134	663.583	944.424	700.19
Rv0831c|Rv0831c|Conserved protein|271 AA	7223500000	6909200000	6532600000	1669300000	185100000	1302000000	10150000000	10382000000	10453000000	5750.81	5340.38	4658.22	5182.57	564.53	4960.32	3168.39	2947.46	3228.68
Rv2296|Rv2296|Probable haloalkane dehalogenase|300 AA	3032900000	4212500000	3075600000	166540000	130730000	226410000	3822100000	4123600000	5425700000	2414.57	3256	2193.12	517.047	398.708	862.57	1193.1	1170.69	1675.87
Rv1194c|Rv1194c|Conserved protein|421 AA	195840000	156520000	227730000	28119000	41405000	80492000	1102300000	1100500000	1044900000	155.913	120.98	162.388	87.299	126.28	306.656	344.091	312.433	322.744
Rv2462c|tig|Probable trigger factor (TF) protein Tig|466 AA	3134200000	3810600000	2715300000	578180000	308050000	212160000	9048100000	9166400000	5856900000	2495.22	2945.35	1936.2	1795.04	939.51	808.281	2824.43	2602.35	1809.05
Rv0283|eccB3|ESX conserved component EccB3. ESX-3 type VII secretion system protein. Possible membrane protein.|538 AA	342060000	498760000	746550000	170230000	54066000	124200000	2088900000	3055500000	1754900000	272.323	385.51	532.344	528.503	164.894	473.174	652.065	867.458	542.046
Rv2941|fadD28|Fatty-acid-AMP ligase FadD28 (fatty-acid-AMP synthetase) (fatty-acid-AMP synthase)|580 AA	1598300000	3251800000	2070400000	502230000	148800000	536020000	6137300000	7525800000	7512700000	1272.45	2513.44	1476.35	1559.24	453.82	2042.11	1915.8	2136.58	2320.49
Rv1779c|Rv1779c|Possible integral membrane protein|597 AA	0	0	62418000	65366000	9237500	25827000	614810000	531640000	610750000	0	0	44.509	202.938	28.173	98.395	191.917	150.933	188.646
Rv1630|rpsA|30S ribosomal protein S1 RpsA|481 AA	6826500000	5900800000	11399000000	365320000	984060000	911850000	17570000000	22872000000	15333000000	5434.75	4560.95	8128.31	1134.19	3001.25	3473.94	5484.6	6493.38	4735.99
Rv0721|rpsE|30S ribosomal protein S5 RpsE|220 AA	2171000000	1728600000	1347000000	38966000	597220000	984330000	8064300000	8005900000	6679600000	1728.39	1336.1	960.508	120.975	1821.44	3750.07	2517.33	2272.88	2063.17
Rv0250c|Rv0250c|Conserved protein|97 AA	319640000	1336100000	1261000000	155000000	56859000	58571000	4427000000	1647900000	1758700000	254.473	1032.72	899.184	481.219	173.412	223.142	1381.92	467.84	543.22
Rv3710|leuA|2-isopropylmalate synthase LeuA (alpha-isopropylmalate synthase) (alpha-IPM synthetase) (IPMS)|644 AA	708750000	763380000	906370000	137160000	48519000	249960000	2486900000	3559600000	2279800000	564.254	590.045	646.307	425.832	147.976	952.29	776.303	1010.57	704.175
Rv3140|fadE23|Probable acyl-CoA dehydrogenase FadE23|401 AA	1137700000	1487800000	2047700000	260180000	314690000	256470000	8465600000	7602200000	6669800000	905.752	1149.98	1460.16	807.765	959.761	977.092	2642.6	2158.27	2060.14
Rv1436|gap|Probable glyceraldehyde 3-phosphate dehydrogenase Gap (GAPDH)|339 AA	2792300000	2977000000	2056200000	507960000	238290000	804140000	10201000000	11332000000	10218000000	2223.02	2301.03	1466.22	1577.03	726.752	3063.59	3184.31	3217.16	3156.09
Rv2185c|TB16.3|Conserved protein TB16.3|144 AA	2667700000	7700900000	5178600000	159060000	265730000	361140000	7750100000	5475700000	4812200000	2123.82	5952.31	3692.72	493.824	810.44	1375.86	2419.25	1554.56	1486.37
Rv2477c|Rv2477c|Probable macrolide-transport ATP-binding protein ABC transporter|558 AA	1677500000	1933200000	2537100000	357190000	105380000	316790000	5389700000	5427500000	4538400000	1335.5	1494.24	1809.14	1108.95	321.394	1206.9	1682.43	1540.87	1401.8
Rv0952|sucD|Probable succinyl-CoA synthetase (alpha chain) SucD (SCS-alpha)|303 AA	3688200000	2970200000	2581500000	297730000	121320000	616600000	5883500000	7188600000	7450900000	2936.27	2295.78	1840.8	924.344	370.009	2349.11	1836.58	2040.85	2301.4
Rv0002|dnaN|DNA polymerase III (beta chain) DnaN (DNA nucleotidyltransferase)|402 AA	627910000	1370800000	1551600000	276600000	38835000	305990000	2316500000	3771900000	4425900000	499.895	1059.54	1106.4	858.743	118.441	1165.75	723.112	1070.85	1367.05
Rv3089|fadD13|Probable chain -fatty-acid-CoA ligase FadD13 (fatty-acyl-CoA synthetase)|503 AA	120130000	282980000	546090000	54963000	24049000	60018000	1285000000	1306800000	1032200000	95.639	218.726	389.402	170.64	73.346	228.655	401.122	371.001	318.822
Rv2373c|dnaJ2|Probable chaperone protein DnaJ2|382 AA	715040000	502470000	266590000	215040000	43601000	75631000	2193100000	3135200000	2321100000	569.261	388.378	190.098	667.622	132.977	288.137	684.591	890.085	716.932
Rv1925|fadD31|Probable acyl-CoA ligase FadD31 (acyl-CoA synthetase) (acyl-CoA synthase)|620 AA	2707500000	2282400000	2238400000	600300000	270720000	112920000	7657600000	9449400000	9562000000	2155.51	1764.15	1596.14	1863.71	825.659	430.199	2390.37	2682.69	2953.47
Rv1292|argS|Probable arginyl-tRNA synthetase ArgS (ARGRS) (arginine--tRNA ligase)|550 AA	689770000	774470000	798630000	64722000	14149000	134430000	754940000	1640400000	1931300000	549.143	598.617	569.481	200.938	43.153	512.148	235.66	465.711	596.532
Rv0636|hadB|(3R)-hydroxyacyl-ACP dehydratase subunit HadB|142 AA	1633200000	1344900000	957400000	63663000	94990000	73784000	2708900000	2474400000	2835500000	1300.23	1039.52	682.695	197.651	289.706	281.1	845.602	702.484	875.817
Rv1310|atpD|Probable ATP synthase beta chain AtpD|486 AA	22061000000	28162000000	23724000000	3220100000	671140000	2435100000	27393000000	31167000000	27633000000	17563.3	21767.5	16916.9	9997.25	2046.88	9277.17	8550.92	8848.33	8535.16
Rv3248c|sahH|Probable adenosylhomocysteinase SahH (S-adenosyl-L-homocysteine hydrolase) (adohcyase)|495 AA	6535900000	6660200000	1478900000	538900000	754560000	338420000	17427000000	19342000000	18336000000	5203.4	5147.91	1054.56	1673.09	2301.3	1289.3	5439.96	5491.21	5663.55
Rv2213|pepB|Probable aminopeptidase PepB|515 AA	761210000	434250000	1554300000	68002000	270830000	149840000	4786400000	4503200000	5539500000	606.018	335.648	1108.33	211.122	825.994	570.856	1494.11	1278.46	1711.02
Rv2711|ideR|Iron-dependent repressor and activator IdeR|230 AA	1119800000	1428300000	1931200000	100120000	193020000	93205000	4623400000	4707200000	3299000000	891.501	1103.99	1377.09	310.837	588.684	355.09	1443.23	1336.38	1018.98
Rv2839c|infB|Probable translation initiation factor if-2 InfB|900 AA	1869900000	1064300000	2488500000	21693000	312260000	389220000	3649900000	5868800000	4946800000	1488.67	822.637	1774.48	67.349	952.35	1482.84	1139.34	1666.16	1527.95
Rv2200c|ctaC|Probable transmembrane cytochrome C oxidase (subunit II) CtaC|363 AA	1193500000	819660000	1353400000	90341000	187180000	128170000	2418100000	5103100000	4552500000	950.175	633.546	965.072	280.476	570.873	488.298	754.827	1448.77	1406.16
Rv1488|Rv1488|Possible exported conserved protein|381 AA	2347700000	2724700000	3269000000	1247400000	40035000	358520000	5734900000	7211300000	6279000000	1869.06	2106.02	2331.03	3872.73	122.101	1365.88	1790.19	2047.29	1939.43
Rv1626|Rv1626|Probable two-component system transcriptional regulator|205 AA	1861200000	664950000	1050600000	39646000	58495000	1594400000	3106600000	4838500000	3670000000	1481.75	513.964	749.154	123.087	178.402	6074.3	969.747	1373.65	1133.57
Rv3458c|rpsD|30S ribosomal protein S4 RpsD|201 AA	4579200000	4476800000	4740100000	529420000	284620000	336420000	10920000000	13197000000	12901000000	3645.62	3460.28	3380.03	1643.66	868.052	1281.68	3408.75	3746.64	3984.81
Rv0566c|Rv0566c|Conserved protein|163 AA	878760000	1151900000	294470000	19163000	226080000	137280000	3730400000	3945600000	2319400000	699.603	890.346	209.978	59.494	689.513	523.005	1164.47	1120.16	716.406
Rv2970c|lipN|Probable lipase/esterase LipN|376 AA	717850000	536760000	527020000	66071000	24429000	85117000	1590100000	2251500000	1274900000	571.498	414.882	375.803	205.127	74.505	324.276	496.361	639.202	393.786
Rv0704|rplB|50S ribosomal protein L2 RplB|280 AA	1622600000	2776800000	1586800000	164770000	369900000	194330000	9632000000	9235100000	7473300000	1291.79	2146.29	1131.5	511.551	1128.14	740.353	3006.7	2621.85	2308.32
Rv2215|dlaT|DlaT	5325500000	6057500000	5726200000	433470000	353980000	369570000	15169000000	10702000000	13623000000	4239.77	4682.07	4083.19	1345.77	1079.59	1407.98	4735.11	3038.3	4207.81
Rv2454c|Rv2454c|Probable oxidoreductase (beta subunit)|373 AA	312620000	494800000	690990000	130640000	61942000	270460000	3869500000	4634400000	3588900000	248.885	382.449	492.726	405.59	188.915	1030.39	1207.89	1315.71	1108.52
Rv0248c|Rv0248c|Probable succinate dehydrogenase [iron-sulfur subunit] (succinic dehydrogenase)|646 AA	1888900000	3477800000	2910400000	318690000	212540000	187900000	8698800000	10536000000	8317100000	1503.8	2688.12	2075.32	989.418	648.218	715.856	2715.39	2991.18	2568.95
Rv0363c|fba|Probable fructose-bisphosphate aldolase Fba|344 AA	1933700000	1549000000	3384800000	201010000	168990000	336330000	7520400000	9610100000	8639100000	1539.47	1197.28	2413.61	624.064	515.396	1281.34	2347.55	2728.31	2668.41
Rv0710|rpsQ|30S ribosomal protein S17 RpsQ|136 AA	1559000000	1310100000	1025300000	182550000	37869000	65657000	2775900000	3245400000	2646800000	1241.16	1012.62	731.113	566.752	115.495	250.138	866.516	921.371	817.532
Rv3774|echA21|Possible enoyl-CoA hydratase EchA21 (enoyl hydrase) (unsaturated acyl-CoA hydratase) (crotonase)|274 AA	1944900000	1182800000	1777400000	481090000	22045000	253680000	4363000000	5599000000	3846100000	1548.38	914.23	1267.41	1493.61	67.234	966.463	1361.94	1589.56	1187.97
Rv2428|ahpC|Alkyl hydroperoxide reductase C protein AhpC (alkyl hydroperoxidase C)|195 AA	1042700000	396200000	462630000	107110000	155570000	136620000	3843100000	5114200000	5439800000	830.12	306.238	329.889	332.538	474.467	520.491	1199.65	1451.92	1680.22
Rv3280|accD5|Probable propionyl-CoA carboxylase beta chain 5 AccD5 (pccase) (propanoyl-CoA:carbon dioxide ligase)|548 AA	2450800000	1348700000	1947900000	244740000	267500000	92543000	8182000000	7681400000	7944800000	1951.14	1042.46	1388.99	759.83	815.838	352.568	2554.07	2180.75	2453.96
Rv2996c|serA1|Probable D-3-phosphoglycerate dehydrogenase SerA1 (PGDH)|528 AA	4587100000	5839400000	5204800000	1479100000	58509000	566250000	8700600000	11263000000	12255000000	3651.91	4513.49	3711.4	4592.07	178.444	2157.28	2715.95	3197.57	3785.27
Rv1856c|Rv1856c|Possible oxidoreductase|225 AA	455980000	430470000	311700000	21282000	132340000	37963000	2060900000	2600200000	2290200000	363.017	332.726	222.265	66.073	403.619	144.63	643.324	738.198	707.387
Rv0243|fadA2|Probable acetyl-CoA acyltransferase FadA2 (3-ketoacyl-CoA thiolase) (beta-ketothiolase)|440 AA	4392500000	5157700000	4963200000	179540000	359180000	710390000	14228000000	13147000000	16737000000	3496.98	3986.58	3539.12	557.407	1095.45	2706.42	4441.37	3732.44	5169.65
Rv3417c|groEL1|60 kDa chaperonin 1 GroEL1 (protein CPN60-1) (GroEL protein 1)|539 AA	12486000000	18133000000	14626000000	2997500000	752710000	144990000	35149000000	34816000000	30248000000	9940.42	14015.7	10429.4	9306.16	2295.66	552.379	10972	9884.28	9342.87
Rv1309|atpG|Probable ATP synthase gamma chain AtpG|305 AA	2471600000	1217000000	1765600000	455330000	28981000	294640000	4816100000	5708200000	6722500000	1967.7	940.664	1259	1413.64	88.388	1122.51	1503.38	1620.56	2076.42
Rv3105c|prfB|Probable peptide chain release factor 2 PrfB (RF-2)|378 AA	847000000	560080000	572960000	41583000	29449000	46631000	2010000000	1708200000	1866800000	674.318	432.907	408.562	129.1	89.815	177.653	627.435	484.959	576.609
Rv1098c|fum|Probable fumarase Fum (fumarate hydratase)|474 AA	2543600000	3268800000	3741300000	463110000	123670000	32930000	5377200000	7458300000	6918200000	2025.02	2526.58	2667.82	1437.79	377.176	125.456	1678.53	2117.42	2136.86
Rv0088|Rv0088|Possible polyketide cyclase/dehydrase|224 AA	897110000	673990000	190130000	81775000	32738000	103880000	4989500000	3119600000	4043400000	714.212	520.952	135.576	253.882	99.846	395.759	1557.51	885.656	1248.91
Rv3029c|fixA|Probable electron transfer flavoprotein (beta-subunit) FixA (beta-ETF) (electron transfer flavoprotein small subunit) (ETFSS)|266 AA	2982200000	4130200000	6109600000	398080000	200070000	202240000	9582000000	15799000000	13334000000	2374.2	3192.38	4356.59	1235.89	610.186	770.488	2991.09	4485.35	4118.55
Rv3874|esxB|10 kDa culture filtrate antigen EsxB (LHP) (CFP10)|100 AA	3239400000	3142300000	3968200000	399610000	169630000	126400000	9890200000	10688000000	10329000000	2578.97	2428.8	2829.61	1240.64	517.348	481.555	3087.3	3034.33	3190.38
Rv0530|Rv0530|Conserved protein|405 AA	708930000	724830000	4202900000	33491000	47060000	160560000	1077800000	4314200000	4058100000	564.397	560.248	2996.97	103.977	143.527	611.697	336.443	1224.8	1253.45
Rv0824c|desA1|Probable acyl-[acyl-carrier protein] desaturase DesA1 (acyl-[ACP] desaturase) (stearoyl-ACP desaturase) (protein Des)|338 AA	898170000	265330000	1115000000	535590000	950980000	251140000	33030000000	27316000000	31126000000	715.056	205.083	795.076	1662.81	2900.36	956.786	10310.5	7755.03	9614.07
Rv3028c|fixB|Probable electron transfer flavoprotein (alpha-subunit) FixB (alpha-ETF) (electron transfer flavoprotein large subunit) (ETFLS)|318 AA	5308300000	10696000000	9330800000	893280000	175450000	1161100000	23167000000	24286000000	19057000000	4226.07	8267.33	6653.53	2773.31	535.098	4423.52	7231.74	6894.81	5886.24
Rv0020c|fhaA|Conserved protein with FHA domain	2645200000	3353200000	4456300000	228890000	153010000	317300000	13254000000	10892000000	9986600000	2105.91	2591.81	3177.66	710.621	466.659	1208.84	4137.33	3092.25	3084.62
Rv3246c|mtrA|Two component sensory transduction transcriptional regulatory protein MtrA|228 AA	1433700000	1660700000	2687100000	292000000	101440000	178830000	9294700000	11132000000	7805100000	1141.4	1283.62	1916.1	906.555	309.378	681.301	2901.41	3160.38	2410.81
Rv3801c|fadD32|Fatty-acid-AMP ligase FadD32 (fatty-acid-AMP synthetase) (fatty-acid-AMP synthase). Also shown to have acyl-ACP ligase activity.|637 AA	2424900000	3483200000	2980300000	262450000	178570000	141460000	10332000000	10438000000	11298000000	1930.52	2692.29	2125.17	814.813	544.614	538.93	3225.21	2963.36	3489.68
Rv2744c|35kd_ag|Conserved 35 kDa alanine rich protein|270 AA	5692100000	6925200000	6978200000	52230000	153180000	480660000	8765700000	10483000000	7504000000	4531.62	5352.74	4975.96	162.155	467.178	1831.2	2736.27	2976.13	2317.8
Rv0227c|Rv0227c|Probable conserved membrane protein|421 AA	958910000	382490000	458600000	143980000	26001000	38213000	2762000000	3113200000	3512200000	763.412	295.641	327.015	447.006	79.299	145.583	862.177	883.84	1084.83
Rv3864|espE|ESX-1 secretion-associated protein EspE|402 AA	376500000	535180000	226600000	35915000	53944000	69337000	4469200000	3799300000	1857000000	299.741	413.66	161.582	111.503	164.522	264.158	1395.09	1078.62	573.582
Rv1479|moxR1|Probable transcriptional regulatory protein MoxR1|377 AA	2810300000	6056100000	6287400000	73239000	382080000	138930000	12379000000	11665000000	9611400000	2237.35	4680.98	4483.37	227.381	1165.29	529.291	3864.19	3311.7	2968.73
Rv0009|ppiA|Probable iron-regulated peptidyl-prolyl cis-trans isomerase A PpiA (PPIase A) (rotamase A)|182 AA	1105900000	2826400000	2605700000	264220000	212610000	125650000	12519000000	15095000000	12925000000	880.435	2184.63	1858.05	820.308	648.431	478.698	3907.89	4285.48	3992.22
Rv3841|bfrB|Bacterioferritin BfrB|181 AA	4351700000	6531800000	3572900000	96643000	133340000	137340000	5819300000	13503000000	9864100000	3464.5	5048.67	2547.74	300.042	406.669	523.234	1816.54	3833.51	3046.78
Rv0685|tuf|Probable iron-regulated elongation factor TU Tuf (EF-TU)|396 AA	31254000000	30300000000	33088000000	16138000000	1221300000	3126000000	74484000000	93359000000	74960000000	24882.1	23420	23594.1	50102.7	3724.8	11909.3	23250.7	26504.7	23153.3
Rv2753c|dapA|Probable dihydrodipicolinate synthase DapA (DHDPS) (dihydrodipicolinate synthetase)|300 AA	315150000	198470000	542400000	13953000	56516000	11088000	1412400000	1939900000	2023400000	250.899	153.405	386.77	43.319	172.366	42.243	440.89	550.739	624.979
Rv1638A|Rv1638A|Conserved hypothetical protein|85 AA	1321100000	1699100000	1512700000	1687400	57858000	50257000	1695800000	1584300000	1268600000	1051.76	1313.3	1078.66	5.239	176.459	191.468	529.356	449.784	391.84
Rv2986c|hupB|DNA-binding protein HU homolog HupB (histone-like protein) (HLP) (21-kDa laminin-2-binding protein)|214 AA	4547000000	4072800000	14543000000	121730000	175460000	128550000	8693200000	21350000000	12715000000	3619.98	3148.02	10370.2	377.928	535.129	489.746	2713.64	6061.28	3927.36
Rv1133c|metE|Probable 5-methyltetrahydropteroyltriglutamate--homocysteine methyltransferase MetE (methionine synthase	19115000000	18538000000	11729000000	1549100000	498520000	406940000	50806000000	59481000000	53469000000	15217.9	14328.7	8363.62	4809.4	1520.42	1550.35	15859.4	16886.7	16515.3
Rv2365c|Rv2365c|Conserved hypothetical protein|113 AA	0	0	0	445080000	0	417850000	42496000	54473000	24382000	0	0	0	1381.81	0	1591.91	13.265	15.465	7.531
Rv3418c|groES|10 kDa chaperonin GroES (protein CPN10) (protein GroES) (BCG-a heat shock protein) (10 kDa antigen)|100 AA	18834000000	26462000000	14940000000	1637700000	685930000	953770000	69419000000	86589000000	70097000000	14994.2	20453.5	10653.3	5084.47	2091.99	3633.64	21669.6	24582.7	21651.3
Rv3285|accA3|Probable bifunctional protein acetyl-/propionyl-coenzyme A carboxylase (alpha chain) AccA3: biotin carboxylase + biotin carboxyl carrier protein (BCCP)|600 AA	2769500000	3985500000	3685600000	193850000	70867000	237320000	14268000000	10885000000	10503000000	2204.87	3080.54	2628.1	601.834	216.135	904.135	4453.85	3090.26	3244.12
Rv3764c|tcrY|Possible two component sensor kinase TcrY|475 AA	0	28768000	0	0	142270000	58151000	20982000	11174000	17597000	0	22.236	0	0	433.904	221.542	6.55	3.172	5.435
Rv1392|metK|Probable S-adenosylmethionine synthetase MetK (mat) (AdoMet synthetase) (methionine adenosyltransferase)|403 AA	3885100000	6113700000	5414200000	43736000	143400000	302900000	12060000000	14095000000	10813000000	3093.03	4725.51	3860.72	135.785	437.35	1153.98	3764.61	4001.58	3339.87
Rv3132c|devS|Two component sensor histidine kinase DevS|578 AA	0	297230000	79569000	13754000	59040000	17410000	3791600000	3671400000	2698000000	0	229.74	56.738	42.701	180.064	66.328	1183.57	1042.31	833.347
Rv1388|mihF|Putative integration host factor MihF|190 AA	4388200000	4339900000	1645200000	205810000	139910000	97765000	18543000000	19261000000	20313000000	3493.56	3354.47	1173.15	638.966	426.706	372.462	5788.33	5468.21	6274.19
Rv0951|sucC|Probable succinyl-CoA synthetase (beta chain) SucC (SCS-beta)|387 AA	4229300000	5384200000	4298200000	1989800000	4569800	620400000	15136000000	14644000000	12892000000	3367.05	4161.65	3064.93	6177.61	13.937	2363.58	4724.81	4157.44	3982.03
Rv3477|PE31|PE family protein PE31|98 AA	157850000	0	234210000	0	0	0	0	1793900	0	125.668	0	167.009	0	0	0	0	0.509	0
Rv0652|rplL|50S ribosomal protein L7/L12 RplL (SA1)|130 AA	4750300000	1675300000	5405900000	94358000	115680000	52248000	10477000000	17692000000	15092000000	3781.83	1294.9	3854.8	292.948	352.808	199.053	3270.47	5022.77	4661.55
Rv0709|rpmC|50S ribosomal protein L29 RpmC|77 AA	688190000	166980000	264930000	18265000	93192000	23798000	6167900000	5774600000	4750100000	547.885	129.065	188.914	56.706	284.223	90.665	1925.35	1639.41	1467.19
Rv0311|Rv0311|Unknown protein|409 AA	0	0	47001000	85775000	65137000	0	156220000	52683000	1899000	0	0	33.515	266.3	198.659	0	48.765	14.957	0.587
Rv3136|PPE51|PPE family protein PPE51|380 AA	180180000	86359000	71543000	0	0	0	0	3204600	0	143.446	66.75	51.015	0	0	0	0	0.91	0
Rv0350|dnaK|Probable chaperone protein DnaK (heat shock protein 70) (heat shock 70 kDa protein) (HSP70)|625 AA	27520000000	18722000000	28163000000	238680000	546860000	61299000	47816000000	56474000000	48188000000	21909.4	14470.9	20082.3	741.015	1667.85	233.535	14926.1	16033	14884.1
Rv0351|grpE|Probable GrpE protein (HSP-70 cofactor)|235 AA	1291500000	1919600000	3463600000	70468000	16682000	39448000	7561600000	6629000000	5698600000	1028.2	1483.73	2469.8	218.778	50.878	150.288	2360.41	1881.98	1760.16
Rv3001c|ilvC|Probable KETOL-acid reductoisomerase IlvC (acetohydroxy-acid isomeroreductase) (alpha-keto-beta-hydroxylacil reductoisomerase)|333 AA	5344900000	3252000000	3891900000	336460000	94033000	606360	6972100000	8143500000	9025900000	4255.21	2513.59	2775.21	1044.59	286.788	2.31	2176.39	2311.95	2787.88
Rv0030|Rv0030|Conserved hypothetical protein|109 AA	0	0	32909000	0	45631000	0	0	31920000	12589000	0	0	23.466	0	139.168	0	0	9.062	3.888
Rv1657|argR|Probable arginine repressor ArgR (AHRC)|170 AA	0	0	29864000	123450000	0	90014000	66941000	41113000	32413000	0	0	21.295	383.268	0	342.933	20.896	11.672	10.012
Rv3499c|mce4A|Mce-family protein Mce4A|400 AA	0	0	0	0	45290000	0	18012000	26522000	0	0	0	0	0	138.128	0	5.623	7.53	0
Rv1330c|pncB1|Nicotinic acid phosphoribosyltransferase PncB1|448 AA	0	0	0	0	115750000	0	43198000	0	30875000	0	0	0	0	353.022	0	13.485	0	9.537
Rv2991|Rv2991|Conserved protein|163 AA	110140000	76274000	22384000	0	62603000	46679000	25420000	37709000	33084000	87.685	58.955	15.961	0	190.931	177.836	7.935	10.706	10.219
Rv2282c|Rv2282c|Probable transcription regulator (LysR family)|312 AA	0	0	0	41648000	0	0	24161000	0	22060000	0	0	0	129.302	0	0	7.542	0	6.814
Rv3362c|Rv3362c|Probable ATP/GTP-binding protein|193 AA	28434000	0	25021000	0	0	0	0	0	12928000	22.637	0	17.842	0	0	0	0	0	3.993
Rv3566c|nat|Arylamine N-acetyltransferase Nat (arylamine acetylase)|283 AA	99407000	245570000	274340000	70297000	97176000	0	35181000	40410000	70916000	79.14	189.81	195.624	218.247	296.373	0	10.982	11.472	21.904
Rv1118c|Rv1118c|Conserved protein|286 AA	0	93988000	169380000	0	120540000	0	42315000	41397000	0	0	72.647	120.78	0	367.63	0	13.209	11.753	0
Rv1470|trxA|Probable thioredoxin TrxA|124 AA	21997000	15392000	22714000	0	0	0	0	0	13510000	17.512	11.897	16.197	0	0	0	0	0	4.173
Rv0421c|Rv0421c|Conserved hypothetical protein|209 AA	90751000	33904000	97456000	0	0	51630000	23595000	0	29544000	72.249	26.206	69.493	0	0	196.698	7.365	0	9.125
Rv0181c|Rv0181c|Conserved hypothetical protein|244 AA	0	0	0	0	42796000	0	0	31360000	21423000	0	0	0	0	130.522	0	0	8.903	6.617
Rv0493c|Rv0493c|Conserved protein|329 AA	52385000	20713000	80371000	0	0	102000000	53595000	0	27701000	41.705	16.01	57.31	0	0	388.597	16.73	0	8.556
Rv3573c|fadE34|Probable acyl-CoA dehydrogenase FadE34|711 AA	18028000	0	404780000	0	0	0	0	0	15883000	14.353	0	288.637	0	0	0	0	0	4.906
Rv1960c|parD1|Possible antitoxin ParD1|83 AA	26788000	21871000	27729000	0	0	0	0	0	16089000	21.327	16.905	19.773	0	0	0	0	0	4.97
Rv2977c|thiL|Probable thiamine-monophosphate kinase ThiL (thiamine-phosphate kinase)|333 AA	0	76274000	24476000	38440000	40771000	0	26118000	33443000	30489000	0	58.955	17.453	119.342	124.346	0	8.153	9.494	9.417
Rv1382|Rv1382|Probable export or membrane protein|165 AA	63830000	87109000	152000000	30027000	47401000	0	17995000	25646000	53553000	50.817	67.33	108.387	93.223	144.567	0	5.617	7.281	16.541
Rv2041c|Rv2041c|Probable sugar-binding lipoprotein|439 AA	0	0	0	17189000	0	0	20538000	0	13792000	0	0	0	53.366	0	0	6.411	0	4.26
Rv0998|Rv0998|Conserved hypothetical protein|333 AA	31532000	21883000	0	0	19198000	0	19095000	0	18711000	25.103	16.914	0	0	58.551	0	5.961	0	5.779
Rv1183|mmpL10|Probable conserved transmembrane transport protein MmpL10|1002 AA	21153000	0	14039000	0	0	0	0	0	16970000	16.84	0	10.011	0	0	0	0	0	5.242
Rv1431|Rv1431|Conserved membrane protein|589 AA	18271000	0	0	0	0	0	0	18034000	0	14.546	0	0	0	0	0	0	5.12	0
Rv3820c|papA2|Possible conserved polyketide synthase associated protein PapA2|468 AA	177680000	152790000	105780000	105570000	0	110740000	85895000	37471000	61692000	141.456	118.097	75.429	327.757	0	421.894	26.813	10.638	19.055
Rv2673|aftC|Possible arabinofuranosyltransferase AftC|433 AA	91026000	52258000	46746000	0	108450000	27892000	37426000	34496000	47943000	72.468	40.392	33.333	0	330.758	106.262	11.683	9.793	14.808
Rv0482|murB|Probable UDP-N-acetylenolpyruvoylglucosamine reductase MurB (UDP-N-acetylmuramate dehydrogenase)|369 AA	67889000	22879000	13036000	31179000	0	0	30584000	0	19886000	54.048	17.684	9.296	96.8	0	0	9.547	0	6.142
Rv1251c|Rv1251c|Conserved hypothetical protein|1139 AA	0	0	0	0	0	0	0	20208000	0	0	0	0	0	0	0	0	5.737	0
Rv3487c|lipF|Probable esterase/lipase LipF|277 AA	0	0	0	34865000	0	48779000	46265000	21773000	34438000	0	0	0	108.243	0	185.837	14.442	6.181	10.637
Rv3753c|Rv3753c|Conserved protein|166 AA	109690000	78054000	210450000	171030000	0	123410000	184480000	64408000	35624000	87.327	60.331	150.066	530.987	0	470.164	57.587	18.285	11.003
Rv2286c|Rv2286c|Conserved hypothetical protein|230 AA	0	56589000	54152000	0	0	0	0	0	23051000	0	43.74	38.614	0	0	0	0	0	7.12
Rv1196|PPE18|PPE family protein PPE18|391 AA	2412200000	2564900000	3469500000	353730000	0	516470000	169850000	103690000	200890000	1920.41	1982.51	2474	1098.2	0	1967.63	53.02	29.438	62.05
Rv0346c|ansP2|Possible L-asparagine permease AnsP2 (L-asparagine transport protein)|487 AA	33123000	42325000	41444000	0	239330000	62996000	104840000	57718000	67052000	26.37	32.715	29.553	0	729.924	240	32.727	16.386	20.711
Rv0340|Rv0340|Conserved protein|179 AA	140170000	36467000	0	0	0	0	0	24919000	0	111.593	28.187	0	0	0	0	0	7.075	0
Rv2217|lipB|Probable lipoate biosynthesis protein B LipB|230 AA	51530000	0	52488000	0	0	0	0	0	26112000	41.024	0	37.428	0	0	0	0	0	8.065
Rv1002c|Rv1002c|Conserved membrane protein|503 AA	53573000	112800000	0	0	0	0	0	0	26774000	42.651	87.187	0	0	0	0	0	0	8.27
Rv3631|Rv3631|Possible transferase (possibly glycosyltransferase)|241 AA	0	0	0	0	60827000	48632000	30034000	45018000	60427000	0	0	0	0	185.514	185.277	9.375	12.781	18.664
Rv0748|vapB31|Possible antitoxin VapB31|85 AA	0	0	0	0	36801000	0	58423000	18551000	0	0	0	0	0	112.238	0	18.237	5.267	0
Rv3164c|moxR3|Probable methanol dehydrogenase transcriptional regulatory protein MoxR3|320 AA	0	0	0	0	29081000	0	0	96628000	8785100	0	0	0	0	88.693	0	0	27.433	2.714
Rv2367c|Rv2367c|Conserved hypothetical protein|182 AA	0	0	0	0	73142000	0	0	42478000	51295000	0	0	0	0	223.073	0	0	12.06	15.844
Rv3315c|cdd|Probable cytidine deaminase Cdd (cytidine aminohydrolase) (cytidine nucleoside deaminase)|133 AA	183120000	45350000	0	0	31830000	0	29360000	32580000	0	145.786	35.053	0	0	97.077	0	9.165	9.249	0
Rv3817|Rv3817|Possible phosphotransferase|251 AA	0	0	0	75191000	0	0	0	92802000	21717000	0	0	0	233.441	0	0	0	26.347	6.708
Rv2234|ptpA|Phosphotyrosine protein phosphatase PtpA (protein-tyrosine-phosphatase) (PTPase) (LMW phosphatase)|163 AA	90264000	39056000	44427000	0	53818000	0	58478000	28328000	0	71.861	30.188	31.68	0	164.137	0	18.254	8.042	0
Rv2964|purU|Probable formyltetrahydrofolate deformylase PurU (formyl-FH(4) hydrolase)|310 AA	50980000	81867000	0	0	46468000	0	17837000	0	86576000	40.586	63.278	0	0	141.721	0	5.568	0	26.741
Rv2846c|efpA|Possible integral membrane efflux protein EfpA|530 AA	10702000	0	87391000	0	0	0	31042000	0	0	8.52	0	62.316	0	0	0	9.69	0	0
Rv3288c|usfY|Putative protein UsfY|137 AA	0	0	0	0	23634000	0	36330000	21483000	0	0	0	0	0	72.08	0	11.341	6.099	0
Rv1750c|fadD1|Possible fatty-acid-CoA ligase FadD1 (fatty-acid-CoA synthetase) (fatty-acid-CoA synthase)|532 AA	0	25564000	0	17985000	0	0	26897000	0	20496000	0	19.759	0	55.837	0	0	8.396	0	6.331
Rv3299c|atsB|Probable arylsulfatase AtsB (aryl-sulfate sulphohydrolase) (sulfatase)|970 AA	226300000	146670000	126760000	33853000	58533000	0	24746000	97259000	24552000	180.163	113.367	90.389	105.101	178.518	0	7.725	27.612	7.584
Rv2218|lipA|Probable lipoate biosynthesis protein A LipA|311 AA	0	0	0	0	67815000	0	0	36810000	61520000	0	0	0	0	206.826	0	0	10.45	19.002
Rv3358|relK|Toxin RelK|85 AA	0	0	0	0	32729000	0	41260000	26810000	0	0	0	0	0	99.819	0	12.88	7.611	0
Rv0626|vapB5|Possible antitoxin VapB5|86 AA	0	0	0	0	32347000	0	0	38079000	29084000	0	0	0	0	98.654	0	0	10.811	8.983
Rv1885c|Rv1885c|Chorismate mutase|199 AA	53702000	36084000	0	0	0	26806000	15966000	0	51763000	42.754	27.891	0	0	0	102.125	4.984	0	15.988
Rv3523|ltp3|Probable lipid carrier protein or keto acyl-CoA thiolase Ltp3|394 AA	0	0	0	0	11323000	0	0	17396000	22983000	0	0	0	0	34.534	0	0	4.939	7.099
Rv3331|sugI|Probable sugar-transport integral membrane protein SugI|502 AA	0	16597000	46878000	0	0	0	35065000	0	0	0	12.828	33.427	0	0	0	10.946	0	0
Rv2378c|mbtG|Lysine-N-oxygenase MbtG (L-lysine 6-monooxygenase) (lysine N6-hydroxylase)|431 AA	0	0	0	0	0	0	0	34108000	0	0	0	0	0	0	0	0	9.683	0
Rv3071|Rv3071|Conserved hypothetical protein|369 AA	0	0	31996000	0	68871000	0	0	38832000	68306000	0	0	22.815	0	210.047	0	0	11.024	21.098
Rv0752c|fadE9|Probable acyl-CoA dehydrogenase FadE9|390 AA	55331000	33877000	75049000	37205000	0	16507000	90493000	15190000	16553000	44.05	26.185	53.515	115.508	0	62.888	28.248	4.312	5.113
Rv2169c|Rv2169c|Probable conserved transmembrane protein|134 AA	134390000	138470000	0	88025000	107240000	0	59636000	84225000	79327000	106.991	107.029	0	273.286	327.067	0	18.616	23.912	24.502
Rv1808|PPE32|PPE family protein PPE32|409 AA	504610000	593610000	85136000	0	0	0	0	37990000	0	401.733	458.823	60.708	0	0	0	0	10.785	0
Rv1835c|Rv1835c|Conserved hypothetical protein|628 AA	0	0	0	0	33055000	0	47276000	0	30176000	0	0	0	0	100.813	0	14.758	0	9.321
Rv1253|deaD|Probable cold-shock DeaD-box protein A homolog DeaD (ATP-dependent RNA helicase dead homolog)|563 AA	27772000	26688000	0	0	51812000	0	36893000	0	61817000	22.11	20.628	0	0	158.019	0	11.516	0	19.094
Rv0028|Rv0028|Conserved hypothetical protein|101 AA	50873000	50865000	0	0	0	0	0	39558000	0	40.501	39.315	0	0	0	0	0	11.231	0
Rv3748|Rv3748|Conserved hypothetical protein|119 AA	51236000	53534000	0	0	0	0	0	39633000	0	40.79	41.378	0	0	0	0	0	11.252	0
Rv1139c|Rv1139c|Conserved hypothetical membrane protein|166 AA	0	0	44364000	0	0	13684000	0	23636000	21872000	0	0	31.635	0	0	52.133	0	6.71	6.756
Rv0909|Rv0909|Conserved hypothetical protein|59 AA	23000000	128680000	64326000	0	0	28819000	34877000	33899000	0	18.311	99.462	45.869	0	0	109.794	10.887	9.624	0
Rv1938|ephB|Probable epoxide hydrolase EphB (epoxide hydratase)|356 AA	92015000	37025000	0	37466000	13358000	0	29886000	26626000	31037000	73.255	28.618	0	116.318	40.74	0	9.329	7.559	9.587
Rv2249c|glpD1|Probable glycerol-3-phosphate dehydrogenase GlpD1|516 AA	0	0	113030000	0	27234000	0	24040000	57255000	0	0	0	80.599	0	83.06	0	7.504	16.255	0
Rv1242|vapC33|Possible toxin VapC33. Contains PIN domain.|143 AA	0	0	0	0	83772000	0	0	71790000	59959000	0	0	0	0	255.493	0	0	20.381	18.52
Rv1289|Rv1289|Unknown protein|210 AA	21669000	0	43952000	0	0	12891000	31754000	0	19255000	17.251	0	31.341	0	0	49.112	9.912	0	5.947
Rv1987|Rv1987|Possible chitinase|142 AA	0	41634000	40871000	0	48457000	33450000	58605000	52937000	27806000	0	32.18	29.144	0	147.787	127.437	18.294	15.029	8.589
Rv3815c|Rv3815c|Possible acyltransferase|251 AA	0	16484000	0	14953000	30891000	0	27228000	31865000	34312000	0	12.741	0	46.424	94.213	0	8.499	9.046	10.598
Rv3647c|Rv3647c|Conserved hypothetical protein|192 AA	15310000	12597000	116530000	16266000	0	0	0	33018000	28691000	12.189	9.737	83.094	50.5	0	0	0	9.374	8.862
Rv1647|Rv1647|Adenylate cyclase (ATP pyrophosphate-lyase) (adenylyl cyclase)|316 AA	14644000	25066000	0	0	29651000	0	88341000	23721000	0	11.658	19.374	0	0	90.431	0	27.576	6.734	0
Rv2088|pknJ|Transmembrane serine/threonine-protein kinase J PknJ (protein kinase J) (STPK J)|589 AA	0	33472000	0	0	21333000	0	18731000	0	85553000	0	25.872	0	0	65.063	0	5.847	0	26.425
Rv0707|rpsC|30S ribosomal protein S3 RpsC|274 AA	2462700000	2440400000	4021800000	1249600	123890000	9132500	7417400000	6887100000	5218800000	1960.62	1886.28	2867.83	3.88	377.847	34.793	2315.39	1955.25	1611.96
Rv2705c|Rv2705c|Conserved hypothetical protein|129 AA	110930000	19249000	16041000	0	0	0	75355000	0	0	88.314	14.878	11.438	0	0	0	23.523	0	0
Rv3495c|lprN|Possible Mce-family lipoprotein LprN (Mce-family lipoprotein Mce4E)|384 AA	0	0	0	0	29006000	0	0	45849000	50441000	0	0	0	0	88.464	0	0	13.017	15.58
Rv3560c|fadE30|Probable acyl-CoA dehydrogenase FadE30|385 AA	0	0	0	0	22712000	0	0	67035000	27874000	0	0	0	0	69.268	0	0	19.031	8.61
Rv1459c|Rv1459c|Possible conserved integral membrane protein|591 AA	0	0	18652000	0	26389000	0	46095000	0	51851000	0	0	13.3	0	80.483	0	14.389	0	16.016
Rv1661|pks7|Probable polyketide synthase Pks7|2126 AA	66542000	0	0	0	5705300	0	11779000	44828000	0	52.976	0	0	0	17.4	0	3.677	12.727	0
Rv2475c|Rv2475c|Conserved protein|138 AA	262670000	143930000	81097000	27466000	0	69291000	31817000	70488000	67518000	209.118	111.249	57.828	85.272	0	263.983	9.932	20.012	20.855
Rv3369|Rv3369|Conserved protein|144 AA	13135000	147130000	85118000	0	40413000	110650000	69158000	79416000	77658000	10.457	113.722	60.695	0	123.254	421.551	21.588	22.546	23.987
Rv1546|Rv1546|Conserved protein|143 AA	239380000	36580000	0	66639000	0	0	0	166590000	35964000	190.576	28.274	0	206.89	0	0	0	47.295	11.108
Rv3024c|trmU|Probable tRNA (5-methylaminomethyl-2-thiouridylate)-methyltransferase TrmU|367 AA	0	0	0	29128000	25266000	0	42706000	37535000	47671000	0	0	0	90.432	77.058	0	13.331	10.656	14.724
Rv3574|kstR|Transcriptional regulatory protein KstR (probably TetR-family)|199 AA	0	0	3140500	0	30681000	0	54631000	59401000	0	0	0	2.239	0	93.573	0	17.053	16.864	0
Rv0695|Rv0695|Conserved hypothetical protein|251 AA	91201000	126710000	34167000	0	0	0	100930000	0	0	72.607	97.939	24.364	0	0	0	31.506	0	0
Rv1864c|Rv1864c|Conserved protein|251 AA	0	0	28730000	0	0	15535000	82343000	19027000	0	0	0	20.487	0	0	59.185	25.704	5.402	0
Rv3559c|Rv3559c|Probable oxidoreductase|262 AA	0	0	0	17251000	0	0	26950000	67325000	0	0	0	0	53.558	0	0	8.413	19.114	0
Rv3765c|tcrX|Probable two component transcriptional regulatory protein TcrX|234 AA	0	100260000	0	35666000	66806000	0	28905000	77323000	122860000	0	77.495	0	110.73	203.749	0	9.023	21.952	37.948
Rv0923c|Rv0923c|Conserved hypothetical protein|354 AA	74940000	111640000	71274000	0	13403000	0	58422000	28908000	0	59.662	86.291	50.824	0	40.877	0	18.237	8.207	0
Rv0406c|Rv0406c|Beta lactamase like protein|272 AA	0	0	43060000	34613000	52867000	0	29404000	132190000	53599000	0	0	30.705	107.461	161.237	0	9.179	37.529	16.555
Rv0060|Rv0060|Conserved hypothetical protein|352 AA	97251000	20869000	78455000	0	144790000	39102000	42879000	102910000	155750000	77.424	16.13	55.944	0	441.59	148.97	13.385	29.216	48.107
Rv3873|PPE68|PPE family protein PPE68|368 AA	0	30394000	51430000	0	0	0	0	119360000	0	0	23.493	36.673	0	0	0	0	33.886	0
Rv0773c|ggtA|Probable bifunctional acylase GgtA: cephalosporin acylase (GL-7ACA acylase) + gamma-glutamyltranspeptidase (GGT)|512 AA	0	0	48476000	0	109480000	23930000	71452000	75715000	62189000	0	0	34.567	0	333.899	91.168	22.304	21.496	19.209
Rv0999|Rv0999|Unknown protein|252 AA	25307000	0	73535000	0	126930000	77028000	99384000	92664000	141940000	20.148	0	52.436	0	387.119	293.459	31.023	26.307	43.842
Rv2994|Rv2994|Probable conserved integral membrane protein|445 AA	18290000	0	0	20915000	0	0	51938000	48978000	0	14.561	0	0	64.934	0	0	16.213	13.905	0
Rv0883c|Rv0883c|Conserved hypothetical protein|253 AA	56824000	0	39735000	0	0	0	133920000	0	0	45.239	0	28.334	0	0	0	41.804	0	0
Rv0561c|Rv0561c|Possible oxidoreductase|408 AA	37563000	0	0	0	15408000	16089000	24403000	67690000	19474000	29.905	0	0	0	46.992	61.295	7.618	19.217	6.015
Rv1022|lpqU|Probable conserved lipoprotein LpqU|243 AA	51368000	0	0	12364000	0	0	85498000	19846000	0	40.895	0	0	38.386	0	0	26.689	5.634	0
Rv2027c|dosT|Two component sensor histidine kinase DosT|573 AA	55960000	69544000	76649000	63732000	108380000	0	67759000	113800000	138840000	44.551	53.753	54.656	197.865	330.544	0	21.151	32.308	42.884
Rv2188c|pimB|Mannosyltransferase PimB|385 AA	0	0	55148000	71206000	0	0	76847000	133850000	0	0	0	39.325	221.069	0	0	23.988	38	0
Rv1316c|ogt|Methylated-DNA--protein-cysteine methyltransferase Ogt (6-O-methylguanine-DNA methyltransferase) (O-6-methylguanine-DNA-alkyltransferase)|165 AA	112540000	0	49241000	72020000	95678000	0	54811000	116860000	182440000	89.596	0	35.112	223.596	291.805	0	17.11	33.177	56.351
Rv0385|Rv0385|Probable monooxygenase|390 AA	15063000	14262000	0	0	0	0	0	154560000	0	11.992	11.024	0	0	0	0	0	43.88	0
Rv3843c|Rv3843c|Probable conserved transmembrane protein|342 AA	63145000	115300000	144030000	0	24587000	35493000	54247000	78087000	32924000	50.271	89.12	102.704	0	74.987	135.22	16.934	22.169	10.169
Rv1455|Rv1455|Conserved protein|287 AA	0	29651000	26187000	0	93956000	15078000	158480000	24179000	72358000	0	22.918	18.673	0	286.553	57.444	49.471	6.864	22.35
Rv2790c|ltp1|Probable lipid-transfer protein Ltp1|401 AA	170410000	150940000	154200000	0	278130000	0	0	214710000	236740000	135.668	116.667	109.956	0	848.258	0	0	60.956	73.123
Rv0631c|recC|Probable exonuclease V (gamma chain) RecC (exodeoxyribonuclease V gamma chain)(exodeoxyribonuclease V polypeptide)|1097 AA	0	0	20372000	9981500	25605000	0	107510000	18184000	25591000	0	0	14.527	30.989	78.092	0	33.56	5.162	7.904
Rv1187|rocA|Probable pyrroline-5-carboxylate dehydrogenase RocA|543 AA	153070000	79843000	54456000	121800000	16274000	0	36155000	74414000	131280000	121.863	61.714	38.831	378.145	49.633	0	11.286	21.126	40.549
Rv2763c|dfrA|Dihydrofolate reductase DfrA (DHFR) (tetrahydrofolate dehydrogenase)|159 AA	0	52213000	145070000	21223000	0	0	30415000	0	124930000	0	40.357	103.445	65.89	0	0	9.494	0	38.588
Rv2065|cobH|Precorrin-8X methylmutase CobH (aka precorrin isomerase)|208 AA	52279000	96715000	161650000	0	0	90335000	172560000	86377000	0	41.621	74.755	115.268	0	0	344.156	53.866	24.522	0
Rv1701|Rv1701|Probable integrase/recombinase|311 AA	34638000	64277000	26327000	0	36377000	23303000	60755000	30148000	91957000	27.576	49.682	18.773	0	110.945	88.779	18.965	8.559	28.403
Rv0876c|Rv0876c|Possible conserved transmembrane protein|548 AA	0	0	0	0	25940000	0	0	60217000	83928000	0	0	0	0	79.113	0	0	17.096	25.923
Rv3376|Rv3376|Conserved hypothetical protein|217 AA	33819000	128350000	93021000	42081000	440130000	0	150310000	131130000	216430000	26.924	99.206	66.331	130.646	1342.34	0	46.92	37.228	66.85
Rv2301|cut2|Probable cutinase Cut2|230 AA	856070000	30715000	0	278890000	143050000	0	97250000	317900000	262350000	681.539	23.741	0	865.853	436.283	0	30.357	90.252	81.034
Rv0166|fadD5|Probable fatty-acid-CoA ligase FadD5 (fatty-acid-CoA synthetase) (fatty-acid-CoA synthase)|554 AA	206530000	594080000	169090000	128360000	0	74532000	133820000	148720000	80830000	164.424	459.186	120.573	398.512	0	283.95	41.773	42.222	24.966
Rv0201c|Rv0201c|Conserved protein|167 AA	58719000	121310000	0	32653000	0	38264000	56456000	104080000	38760000	46.748	93.765	0	101.376	0	145.777	17.623	29.548	11.972
Rv1569|bioF1|Probable 8-amino-7-oxononanoate synthase BioF1 (AONS) (8-amino-7-ketopelargonate synthase) (7-keto-8-amino-pelargonic acid synthetase) (7-KAP synthetase) (L-alanine--pimelyl CoA ligase)|386 AA	0	0	0	0	39930000	20974000	62000000	42996000	69265000	0	0	0	0	121.781	79.906	19.354	12.207	21.394
Rv3330|dacB1|Probable penicillin-binding protein DacB1 (D-alanyl-D-alanine carboxypeptidase) (DD-peptidase) (DD-carboxypeptidase) (PBP) (DD-transpeptidase) (serine-type D-ala-D-ala carboxypeptidase) (D-amino acid hydrolase)|405 AA	36661000	31275000	15177000	21622000	0	27307000	90732000	23203000	60824000	29.187	24.174	10.822	67.129	0	104.033	28.323	6.587	18.787
Rv3198c|uvrD2|Probable ATP-dependent DNA helicase II UvrD2|700 AA	14909000	61343000	16134000	11852000	97699000	0	29172000	105530000	80781000	11.869	47.414	11.505	36.796	297.968	0	9.106	29.96	24.951
Rv1274|lprB|Possible lipoprotein LprB|185 AA	13799000	0	0	0	0	0	0	210080000	0	10.986	0	0	0	0	0	0	59.642	0
Rv3203|lipV|Possible lipase LipV|224 AA	28590000	0	76290000	0	199110000	46991000	136240000	122400000	132700000	22.761	0	54.4	0	607.258	179.025	42.528	34.749	40.988
Rv2242|Rv2242|Conserved hypothetical protein|414 AA	94454000	92708000	98486000	39478000	53542000	0	76524000	92904000	69489000	75.197	71.657	70.228	122.565	163.296	0	23.887	26.376	21.463
Rv3254|Rv3254|Conserved hypothetical protein|462 AA	0	0	0	0	36927000	26293000	68301000	63060000	51893000	0	0	0	0	112.622	100.17	21.321	17.903	16.028
Rv0137c|msrA|Probable peptide methionine sulfoxide reductase MsrA (protein-methionine-S-oxide reductase) (peptide met(O) reductase)|182 AA	169610000	87718000	137990000	0	94640000	48539000	95423000	104520000	109410000	135.031	67.8	98.397	0	288.639	184.922	29.787	29.673	33.794
Rv1691|Rv1691|Conserved hypothetical protein|250 AA	32798000	41182000	113920000	30077000	64601000	0	107560000	76559000	58697000	26.111	31.831	81.233	93.378	197.024	0	33.576	21.735	18.13
Rv1280c|oppA|Probable periplasmic oligopeptide-binding lipoprotein OppA|591 AA	205070000	32688000	185210000	32439000	55218000	0	59903000	73177000	101620000	163.261	25.266	132.068	100.711	168.407	0	18.699	20.775	31.388
Rv1505c|Rv1505c|Conserved hypothetical protein|221 AA	43261000	0	0	0	28302000	0	0	93620000	78940000	34.441	0	0	0	86.317	0	0	26.579	24.383
Rv1083|Rv1083|Conserved hypothetical protein|88 AA	0	0	0	0	33350000	19871000	85774000	54873000	38743000	0	0	0	0	101.713	75.704	26.775	15.578	11.967
Rv2114|Rv2114|Conserved protein|207 AA	58008000	93014000	185480000	35049000	108930000	0	68445000	145180000	107030000	46.182	71.894	132.261	108.815	332.221	0	21.366	41.217	33.059
Rv2569c|Rv2569c|Conserved hypothetical protein|314 AA	69610000	29224000	58230000	34922000	149270000	0	106420000	129160000	111990000	55.418	22.588	41.522	108.42	455.253	0	33.22	36.669	34.591
Rv3137|Rv3137|Probable monophosphatase|260 AA	0	70188000	68941000	45128000	82679000	0	123660000	71479000	132010000	0	54.251	49.16	140.106	252.16	0	38.601	20.293	40.775
Rv0586|mce2R|Probable transcriptional regulatory protein Mce2R (GntR-family)|240 AA	17712000	28884000	0	0	0	0	286770000	0	0	14.101	22.326	0	0	0	0	89.517	0	0
Rv0133|Rv0133|GCN5-related N-acetyltransferase|201 AA	0	0	0	19648000	0	20715000	79312000	25071000	59483000	0	0	0	61	0	78.919	24.758	7.118	18.373
Rv0568|cyp135B1|Possible cytochrome P450 135B1 Cyp135B1|472 AA	35357000	0	73476000	59293000	172240000	0	210440000	302930000	50556000	28.149	0	52.394	184.083	525.308	0	65.69	86.002	15.616
Rv2183c|Rv2183c|Conserved protein|131 AA	88453000	60162000	23440000	79926000	0	85972000	111910000	182090000	84518000	70.42	46.501	16.714	248.141	0	327.534	34.933	51.695	26.106
Rv2244|acpM|Meromycolate extension acyl carrier protein AcpM|115 AA	727100000	3073700000	19360000000	57173000	20098000	27393000	25621000000	25261000000	26117000000	578.863	2375.78	13805.1	177.502	61.296	104.361	7997.77	7171.61	8066.91
Rv3279c|birA|Possible bifunctional protein BirA: biotin operon repressor + biotin--[acetyl-CoA-carboxylase] synthetase (biotin--protein ligase)|266 AA	44894000	0	0	15965000	0	0	0	65526000	78398000	35.741	0	0	49.566	0	0	0	18.603	24.215
Rv2675c|Rv2675c|Conserved hypothetical protein|250 AA	165530000	167440000	447450000	134850000	0	80291000	27460000	334530000	293000000	131.783	129.421	319.064	418.661	0	305.89	8.572	94.973	90.501
Rv3779|Rv3779|Probable conserved transmembrane protein alanine and leucine rich|666 AA	32872000	20739000	15418000	92318000	40762000	0	150160000	172080000	52815000	26.17	16.03	10.994	286.614	124.318	0	46.873	48.854	16.313
Rv1852|ureG|Urease accessory protein UreG|224 AA	179130000	64898000	184920000	0	57943000	0	120130000	0	192820000	142.61	50.162	131.861	0	176.718	0	37.499	0	59.557
Rv0765c|Rv0765c|Probable oxidoreductase|275 AA	0	0	0	0	17370000	0	95519000	70236000	0	0	0	0	0	52.976	0	29.817	19.94	0
Rv3303c|lpdA|NAD(P)H quinone reductase LpdA|493 AA	303450000	228660000	104100000	46282000	0	123680000	76295000	220360000	100240000	241.584	176.74	74.231	143.689	0	471.192	23.816	62.56	30.962
Rv2342|Rv2342|Conserved hypothetical protein|85 AA	94692000	247840000	66233000	0	65507000	0	185320000	0	166790000	75.387	191.565	47.229	0	199.787	0	57.849	0	51.517
Rv0751c|mmsB|Probable 3-hydroxyisobutyrate dehydrogenase MmsB (hibadh)|294 AA	235660000	154740000	48499000	137090000	43506000	0	136850000	138130000	148870000	187.615	119.604	34.583	425.615	132.687	0	42.719	39.215	45.982
Rv3545c|cyp125|Probable cytochrome P450 125 Cyp125|433 AA	86725000	134910000	131810000	31901000	0	42763000	151720000	39104000	105000000	69.044	104.277	93.99	99.041	0	162.917	47.36	11.102	32.432
Rv3518c|cyp142|Probable cytochrome P450 monooxygenase 142 Cyp142|398 AA	25093000	0	13366000	0	53924000	43158000	115480000	100610000	93995000	19.977	0	9.531	0	164.461	164.422	36.048	28.563	29.033
Rv0017c|rodA|Probable cell division protein RodA|469 AA	0	0	30329000	26346000	41422000	0	82380000	108240000	57889000	0	0	21.627	81.795	126.331	0	25.715	30.729	17.881
Rv3265c|wbbL1|dTDP-RHA:a-D-GlcNAc-diphosphoryl polyprenol	226120000	162730000	253430000	82751000	104580000	0	51788000	239650000	326830000	180.02	125.78	180.714	256.912	318.955	0	16.166	68.037	100.95
Rv2113|Rv2113|Probable integral membrane protein|397 AA	60386000	126510000	0	59952000	0	22657000	115400000	75261000	70482000	48.075	97.784	0	186.129	0	86.318	36.023	21.367	21.77
Rv0529|ccsA|Possible cytochrome C-type biogenesis protein CcsA|324 AA	70467000	85113000	171080000	43308000	0	50746000	51906000	152620000	117870000	56.101	65.787	121.992	134.456	0	193.331	16.203	43.329	36.407
Rv0232|Rv0232|Probable transcriptional regulatory protein (probably TetR/AcrR-family)|229 AA	0	0	0	26207000	0	23117000	93894000	49805000	60909000	0	0	0	81.363	0	88.07	29.31	14.14	18.813
Rv1458c|Rv1458c|Probable unidentified antibiotic-transport ATP-binding protein ABC transporter|313 AA	47398000	19042000	81812000	35258000	49170000	0	55405000	176980000	85938000	37.735	14.718	58.338	109.463	149.962	0	17.295	50.245	26.544
Rv3662c|Rv3662c|Conserved hypothetical protein|256 AA	0	27590000	0	0	0	16497000	0	97715000	76728000	0	21.325	0	0	0	62.85	0	27.741	23.699
Rv3036c|TB22.2|Probable conserved secreted protein TB22.2|227 AA	875300000	1096700000	358680000	147650000	0	127610000	313080000	126920000	221810000	696.848	847.68	255.765	458.4	0	486.165	97.73	36.033	68.512
Rv0791c|Rv0791c|Conserved protein|347 AA	0	47005000	51487000	61441000	92242000	0	100200000	186560000	184920000	0	36.332	36.714	190.752	281.325	0	31.278	52.965	57.117
Rv0711|atsA|Possible arylsulfatase AtsA (aryl-sulfate sulphohydrolase) (arylsulphatase)|787 AA	63696000	0	19309000	94911000	65890000	0	43361000	370060000	213470000	50.71	0	13.769	294.664	200.955	0	13.535	105.06	65.936
Rv2410c|Rv2410c|Conserved protein|325 AA	388450000	212980000	338770000	56310000	64926000	0	184820000	177840000	69168000	309.255	164.62	241.567	174.822	198.015	0	57.693	50.489	21.364
Rv3307|deoD|Probable purine nucleoside phosphorylase DeoD (inosine phosphorylase) (PNP)|268 AA	47965000	0	32135000	37106000	52647000	0	185520000	157810000	41820000	38.186	0	22.915	115.201	160.566	0	57.911	44.802	12.917
Rv1508c|Rv1508c|Probable membrane protein|599 AA	35513000	0	50625000	50701000	0	154850000	29481000	350280000	333810000	28.273	0	36.099	157.408	0	589.943	9.203	99.445	103.106
Rv2976c|ung|Probable uracil-DNA glycosylase Ung (UDG)|227 AA	0	168610000	87824000	102900000	0	154890000	125300000	234880000	271360000	0	130.325	62.625	319.467	0	590.095	39.113	66.683	83.817
Rv1170|mshB|N-acetyl-1-D-myo-inosityl-2-amino-2-deoxy-alpha-D-glucopyranoside deacetylase MshB (GlcNAc-Ins deacetylase)|303 AA	65782000	106380000	455510000	120610000	0	0	0	249990000	284510000	52.371	82.225	324.812	374.451	0	0	0	70.972	87.878
Rv2592c|ruvB|Probable holliday junction DNA helicase RuvB|344 AA	55059000	39977000	50415000	0	0	47030000	0	172860000	157830000	43.834	30.9	35.95	0	0	179.174	0	49.075	48.75
Rv3544c|fadE28|Probable acyl-CoA dehydrogenase FadE28|339 AA	0	0	0	0	5386800	0	0	48589000	79865000	0	0	0	0	16.429	0	0	13.794	24.668
Rv0078|Rv0078|Probable transcriptional regulatory protein|201 AA	37954000	115240000	97891000	0	78386000	28301000	216220000	169440000	43021000	30.216	89.073	69.803	0	239.067	107.82	67.495	48.104	13.288
Rv0564c|gpdA1|Probable glycerol-3-phosphate dehydrogenase [NAD(P)+] GpdA1 (NAD(P)H-dependent glycerol-3-phosphate dehydrogenase) (NAD(P)H-dependent dihydroxyacetone-phosphate reductase)|341 AA	377710000	464630000	419040000	0	101340000	59118000	134520000	131280000	252750000	300.704	359.13	298.806	0	309.073	225.226	41.991	37.27	78.068
Rv2263|Rv2263|Possible oxidoreductase|317 AA	51228000	29189000	0	27759000	55913000	0	96413000	144840000	79658000	40.784	22.561	0	86.182	170.527	0	30.096	41.12	24.604
Rv0508|Rv0508|Conserved hypothetical protein|97 AA	0	0	36700000	0	0	9013100	0	60070000	96766000	0	0	26.17	0	0	34.338	0	17.054	29.889
Rv3237c|Rv3237c|Conserved protein|160 AA	642120000	139000000	365710000	244020000	0	106390000	135920000	306620000	374680000	511.208	107.438	260.778	757.594	0	405.322	42.428	87.05	115.73
Rv0426c|Rv0426c|Possible transmembrane protein|147 AA	470810000	130610000	162090000	43524000	0	0	193290000	0	174330000	374.824	100.953	115.582	135.126	0	0	60.337	0	53.846
Rv0813c|Rv0813c|Conserved protein|226 AA	242900000	242670000	178480000	51425000	92773000	0	71363000	263940000	197820000	193.379	187.569	127.269	159.656	282.945	0	22.276	74.933	61.102
Rv0510|hemC|Probable porphobilinogen deaminase HemC (PBG) (hydroxymethylbilane synthase) (HMBS) (pre-uroporphyrinogen synthase)|309 AA	165230000	92056000	84911000	0	63658000	31224000	228590000	69080000	111190000	131.544	71.153	60.548	0	194.148	118.956	71.356	19.612	34.344
Rv0184|Rv0184|Conserved hypothetical protein|249 AA	108290000	0	143560000	36455000	71497000	0	126120000	125980000	141410000	86.212	0	102.369	113.18	218.056	0	39.369	35.766	43.678
Rv1322A|Rv1322A|Conserved protein|152 AA	44668000	38940000	40084000	0	34270000	0	0	256390000	115780000	35.561	30.098	28.583	0	104.519	0	0	72.789	35.762
Rv2607|pdxH|Probable pyridoxamine 5-phosphate oxidase PdxH (PNP/PMP oxidase) (pyridoxinephosphate oxidase) (PNPOX) (pyridoxine 5-phosphate oxidase)|224 AA	93173000	371310000	335310000	0	122200000	64841000	116480000	249100000	233990000	74.177	286.999	239.1	0	372.693	247.029	36.36	70.72	72.274
Rv3547|ddn|Deazaflavin-dependent nitroreductase Ddn|151 AA	78000000	54394000	754110000	148540000	121310000	0	57404000	470980000	565760000	62.098	42.043	537.735	461.163	369.979	0	17.919	133.712	174.75
Rv1379|pyrR|Probable pyrimidine operon regulatory protein PyrR|193 AA	14347000	423330000	169010000	95566000	0	80925000	333310000	111460000	174350000	11.422	327.207	120.516	296.698	0	308.306	104.045	31.644	53.852
Rv2733c|Rv2733c|Conserved hypothetical alanine	0	0	95837000	28381000	47698000	0	124450000	75966000	148120000	0	0	68.339	88.113	145.472	0	38.848	21.567	45.751
Rv0025|Rv0025|Conserved hypothetical protein|120 AA	0	16323000	20180000	0	41794000	19751000	193920000	72797000	59668000	0	12.617	14.39	0	127.466	75.247	60.533	20.667	18.43
Rv0075|Rv0075|Probable aminotransferase|390 AA	29985000	48738000	203090000	42160000	0	125260000	51218000	247960000	316010000	23.872	37.671	144.818	130.892	0	477.212	15.988	70.396	97.608
Rv0480c|Rv0480c|Possible amidohydrolase|280 AA	103110000	170130000	196930000	35778000	50829000	0	38820000	212890000	203740000	82.088	131.5	140.425	111.078	155.021	0	12.118	60.44	62.93
Rv1362c|Rv1362c|Possible membrane protein|220 AA	169120000	260550000	182330000	0	44000000	46028000	116620000	150470000	113550000	134.641	201.389	130.014	0	134.194	175.356	36.404	42.719	35.073
Rv0214|fadD4|Probable fatty-acid-CoA ligase FadD4 (fatty-acid-CoA synthetase) (fatty-acid-CoA synthase)|537 AA	29203000	0	0	0	61961000	35883000	139420000	142550000	120720000	23.249	0	0	0	188.973	136.706	43.521	40.47	37.287
Rv2092c|helY|ATP-dependent DNA helicase HelY|906 AA	20544000	74286000	63891000	60861000	54700000	0	190380000	138060000	148860000	16.356	57.418	45.559	188.951	166.827	0	59.428	39.195	45.979
Rv2518c|ldtB|Probable L	0	98876000	71648000	37334000	147610000	0	219050000	192350000	160250000	0	76.425	51.09	115.909	450.19	0	68.378	54.608	49.497
Rv3040c|Rv3040c|Conserved protein|288 AA	226950000	365300000	151400000	42025000	56965000	0	112740000	136260000	182320000	180.681	282.354	107.959	130.472	173.735	0	35.193	38.684	56.314
Rv1486c|Rv1486c|Conserved hypothetical protein|288 AA	20534000	0	0	44407000	45848000	0	103600000	195160000	112490000	16.348	0	0	137.868	139.83	0	32.339	55.406	34.745
Rv1625c|cya|Membrane-anchored adenylyl cyclase Cya (ATP pyrophosphate-lyase) (adenylate cyclase)|443 AA	25522000	39563000	22017000	0	51936000	32713000	355450000	33587000	196500000	20.319	30.58	15.7	0	158.398	124.629	110.956	9.535	60.694
Rv1336|cysM|Cysteine synthase B CysM (CSASE B) (O-phosphoserine sulfhydrylase B) (O-phosphoserine (thiol)-lyase B)|323 AA	0	184510000	56389000	0	68739000	24564000	263810000	216430000	34874000	0	142.615	40.209	0	209.644	93.583	82.35	61.445	10.772
Rv3837c|Rv3837c|Probable phosphoglycerate mutase (phosphoglyceromutase) (phosphoglycerate phosphomutase)|232 AA	106390000	0	0	41196000	0	17535000	99325000	79272000	104600000	84.7	0	0	127.899	0	66.804	31.005	22.505	32.308
Rv3041c|Rv3041c|Probable conserved ATP-binding protein ABC transporter|287 AA	37965000	36735000	136130000	43039000	309990000	0	160040000	248730000	463720000	30.225	28.394	97.071	133.621	945.427	0	49.958	70.615	143.232
Rv0496|Rv0496|Conserved hypothetical protein|328 AA	161230000	302020000	180550000	0	129170000	56387000	360050000	340280000	78938000	128.359	233.442	128.745	0	393.951	214.822	112.392	96.606	24.382
Rv0852|fadD16|Possible fatty-acid-CoA ligase FadD16 (fatty-acid-CoA synthetase) (fatty-acid-CoA synthase)|278 AA	114080000	109370000	111780000	0	0	31144000	111180000	0	355650000	90.822	84.536	79.707	0	0	118.652	34.706	0	109.852
Rv2051c|ppm1|Polyprenol-monophosphomannose synthase Ppm1|874 AA	83446000	70756000	198210000	0	345970000	157660000	371240000	537780000	362800000	66.433	54.69	141.338	0	1055.16	600.648	115.885	152.676	112.06
Rv0072|Rv0072|Probable glutamine-transport transmembrane protein ABC transporter|349 AA	215980000	112750000	167070000	58246000	238810000	0	173830000	321580000	360990000	171.947	87.149	119.133	180.833	728.338	0	54.262	91.297	111.501
Rv2568c|Rv2568c|Conserved hypothetical protein|341 AA	31899000	0	52289000	144890000	215880000	0	242730000	394370000	475280000	25.396	0	37.286	449.831	658.404	0	75.77	111.962	146.802
Rv2361c|Rv2361c|Long (C50) chain Z-isoprenyl diphosphate synthase (Z-decaprenyl diphosphate synthase)|296 AA	68183000	77987000	106010000	41621000	64692000	0	216570000	91326000	208680000	54.282	60.279	75.593	129.218	197.302	0	67.604	25.928	64.456
Rv1696|recN|Probable DNA repair protein RecN (recombination protein N)|587 AA	64288000	32505000	20382000	0	31384000	30264000	129960000	155940000	66930000	51.181	25.124	14.534	0	95.717	115.299	40.568	44.271	20.673
Rv0555|menD|Probable bifunctional menaquinone biosynthesis protein MenD : 2-succinyl-6-hydroxy-2	195030000	300890000	245000000	0	152530000	46079000	71402000	365490000	364260000	155.268	232.569	174.703	0	465.195	175.55	22.289	103.763	112.511
Rv1368|lprF|Probable conserved lipoprotein LprF|261 AA	61812000	123600000	93127000	0	127470000	53898000	177050000	323920000	172570000	49.21	95.535	66.406	0	388.766	205.339	55.267	91.961	53.303
Rv0207c|Rv0207c|Conserved hypothetical protein|242 AA	173790000	136410000	135980000	84561000	69796000	0	158890000	303890000	192170000	138.359	105.436	96.964	262.531	212.868	0	49.599	86.275	59.357
Rv0307c|Rv0307c|Unknown protein|160 AA	0	77878000	54550000	0	56277000	49518000	46800000	207100000	421310000	0	60.195	38.898	0	171.637	188.652	14.609	58.796	130.132
Rv2923c|Rv2923c|Conserved protein|137 AA	154610000	70272000	0	77372000	0	33611000	183190000	225580000	87562000	123.089	54.316	0	240.212	0	128.05	57.184	64.042	27.046
Rv1387|PPE20|PPE family protein PPE20|539 AA	316190000	537780000	342970000	6028400	0	40419000	76205000	88177000	53725000	251.727	415.67	244.562	18.716	0	153.987	23.788	25.034	16.594
Rv1586c|Rv1586c|Probable PhiRv1 integrase|469 AA	0	0	0	0	49321000	5502200	51824000	193200000	40890000	0	0	0	0	150.422	20.962	16.177	54.85	12.63
Rv2184c|Rv2184c|Conserved hypothetical protein|379 AA	0	0	19768000	0	16014000	0	0	204820000	130360000	0	0	14.096	0	48.84	0	0	58.149	40.265
Rv1446c|opcA|Putative OXPP cycle protein OpcA|303 AA	76008000	73359000	122380000	0	31328000	0	222020000	0	255760000	60.512	56.702	87.266	0	95.546	0	69.305	0	78.998
Rv0758|phoR|Possible two component system response sensor kinase membrane associated PhoR|485 AA	43194000	49752000	0	80245000	26451000	0	144680000	179270000	136940000	34.388	38.455	0	249.132	80.672	0	45.163	50.895	42.297
Rv2818c|Rv2818c|Hypothetical protein|382 AA	30764000	0	71020000	0	82871000	27274000	194760000	248490000	75583000	24.492	0	50.642	0	252.745	103.908	60.796	70.546	23.346
Rv3319|sdhB|Probable succinate dehydrogenase (iron-sulphur protein subunit) SdhB (succinic dehydrogenase) (fumarate reductase) (fumarate dehydrogenase) (fumaric hydrogenase)|263 AA	91429000	182070000	164220000	0	139440000	52449000	193290000	283290000	224230000	72.789	140.729	117.101	0	425.273	199.819	60.337	80.426	69.259
Rv1489|Rv1489|Conserved protein|118 AA	0	155960000	67855000	0	208450000	167000000	380060000	404720000	387560000	0	120.547	48.386	0	635.744	636.232	118.638	114.9	119.708
Rv1656|argF|Probable ornithine carbamoyltransferase	82236000	84600000	0	30225000	22342000	0	284040000	98864000	44380000	65.47	65.39	0	93.838	68.14	0	88.665	28.068	13.708
Rv3591c|Rv3591c|Possible hydrolase|257 AA	0	0	0	0	4468600	38109000	65146000	57805000	77749000	0	0	0	0	13.629	145.187	20.336	16.411	24.015
Rv1108c|xseA|Probable exodeoxyribonuclease VII (large subunit) XseA (exonuclease VII large subunit)|415 AA	45131000	0	0	23329000	0	47875000	101530000	125120000	143280000	35.93	0	0	72.428	0	182.393	31.693	35.522	44.256
Rv3554|fdxB|Possible electron transfer protein FdxB|685 AA	65692000	0	0	44498000	0	63333000	112300000	254260000	150460000	52.299	0	0	138.15	0	241.284	35.055	72.185	46.473
Rv1281c|oppD|Probable oligopeptide-transport ATP-binding protein ABC transporter OppD|612 AA	112260000	381740000	368090000	65352000	42824000	0	125980000	173150000	246730000	89.373	295.061	262.475	202.894	130.607	0	39.326	49.157	76.209
Rv0536|galE3|Probable UDP-glucose 4-epimerase GalE3 (galactowaldenase) (UDP-galactose 4-epimerase) (uridine diphosphate galactose 4-epimerase) (uridine diphospho-galactose 4-epimerase)|346 AA	36700000	0	0	0	46325000	0	1461600000	64402000	0	29.218	0	0	0	141.285	0	456.249	18.284	0
Rv3858c|gltD|Probable NADH-dependent glutamate synthase (small subunit) GltD (L-glutamate synthase) (L-glutamate synthetase) (NADH-glutamate synthase) (glutamate synthase (NADH)) (GLTS beta chain) (NADPH-GOGAT)|488 AA	166170000	526570000	440240000	61460000	84196000	0	320950000	220830000	159960000	132.292	407.005	313.923	190.811	256.786	0	100.187	62.694	49.408
Rv3194c|Rv3194c|Possible conserved secreted protein|340 AA	268470000	340350000	250240000	99766000	88371000	0	303050000	241980000	277420000	213.736	263.069	178.439	309.737	269.519	0	94.599	68.698	85.688
Rv2511|orn|Oligoribonuclease Orn|215 AA	295170000	279460000	80924000	70500000	125400000	0	310950000	248900000	280530000	234.992	216.005	57.705	218.877	382.453	0	97.065	70.663	86.649
Rv0331|Rv0331|Possible dehydrogenase/reductase|388 AA	83658000	44363000	86482000	30012000	254420000	0	209730000	361750000	233610000	66.602	34.29	61.668	93.176	775.946	0	65.469	102.701	72.156
Rv2466c|Rv2466c|Conserved protein|207 AA	422040000	132560000	868430000	293040000	0	277400000	923340000	563590000	302880000	335.997	102.461	619.253	909.784	0	1056.83	288.227	160.004	93.552
Rv0314c|Rv0314c|Possible conserved membrane protein|220 AA	0	0	0	0	0	75843000	0	888340000	169010000	0	0	0	0	0	288.944	0	252.2	52.203
Rv3582c|ispD|4-diphosphocytidyl-2C-methyl-D-erythritol synthase IspD (MEP cytidylyltransferase) (MCT)|231 AA	114280000	171780000	211020000	51451000	0	188100000	225940000	243620000	345020000	90.981	132.775	150.472	159.737	0	716.618	70.529	69.164	106.568
Rv2611c|Rv2611c|Probable acyltransferase|316 AA	0	0	413740000	39810000	11077000	0	85721000	108200000	114880000	0	0	295.026	123.596	33.783	0	26.758	30.718	35.484
Rv1126c|Rv1126c|Conserved protein|201 AA	155580000	62602000	149300000	0	40795000	170150000	254160000	311960000	209990000	123.861	48.387	106.462	0	124.419	648.233	79.338	88.566	64.861
Rv3044|fecB|Probable FEIII-dicitrate-binding periplasmic lipoprotein FecB|359 AA	488650000	424950000	940830000	135960000	0	52102000	140080000	365640000	261290000	389.027	328.46	670.88	422.107	0	198.497	43.727	103.805	80.706
Rv2221c|glnE|Glutamate-ammonia-ligase adenylyltransferase GlnE (glutamine-synthetase adenylyltransferase)|994 AA	211490000	111280000	189500000	0	218520000	148160000	426800000	495950000	382800000	168.373	86.012	135.127	0	666.456	564.456	133.229	140.801	118.238
Rv1331|Rv1331|Conserved hypothetical protein|101 AA	0	40430000	0	20590000	31979000	0	114490000	152470000	99003000	0	31.25	0	63.925	97.532	0	35.739	43.286	30.58
Rv2305|Rv2305|Unknown protein|429 AA	214960000	382250000	100890000	265020000	0	156010000	647420000	488720000	293750000	171.135	295.455	71.942	822.792	0	594.362	202.097	138.748	90.732
Rv3890c|esxC|ESAT-6 like protein EsxC (ESAT-6 like protein 11)|95 AA	185490000	374630000	333480000	70200000	44623000	0	200020000	188400000	234230000	147.673	289.565	237.795	217.946	136.094	0	62.438	53.487	72.348
Rv2419c|gpgP|Glucosyl-3-phosphoglycerate phosphatase GpgP|223 AA	266760000	122070000	82038000	185110000	0	120870000	417870000	436800000	269960000	212.374	94.352	58.499	574.7	0	460.487	130.441	124.008	83.384
Rv3894c|eccC2|ESX conserved component EccC2. ESX-2 type VII secretion system protein. Possible membrane protein.|1396 AA	128650000	58491000	0	39813000	21407000	0	168110000	179480000	79734000	102.422	45.21	0	123.605	65.288	0	52.477	50.954	24.628
Rv3050c|Rv3050c|Probable transcriptional regulatory protein (probably AsnC-family)|246 AA	274150000	102790000	116890000	401370000	76223000	0	765120000	311150000	438200000	218.258	79.45	83.351	1246.11	232.47	0	238.838	88.336	135.349
Rv3726|Rv3726|Possible dehydrogenase|397 AA	84397000	353290000	250100000	520370000	0	144290000	384220000	520480000	899350000	67.191	273.071	178.339	1615.56	0	549.712	119.937	147.765	277.787
Rv2893|Rv2893|Possible oxidoreductase|325 AA	17167000	35626000	84781000	7555100	10478000	0	32855000	91304000	72511000	13.667	27.537	60.455	23.456	31.956	0	10.256	25.921	22.397
Rv3313c|add|Probable adenosine deaminase Add (adenosine aminohydrolase)|365 AA	191820000	104920000	33237000	0	94800000	16480000	96907000	147520000	318310000	152.713	81.097	23.7	0	289.127	62.785	30.25	41.881	98.318
Rv0949|uvrD1|Probable ATP-dependent DNA helicase II UvrD1|771 AA	59571000	106980000	118690000	35009000	175030000	0	188280000	348920000	285110000	47.426	82.689	84.635	108.69	533.817	0	58.773	99.059	88.064
Rv2793c|truB|Probable tRNA pseudouridine synthase B TruB (tRNA pseudouridine 55 synthase) (PSI55 synthase) (pseudouridylate synthase) (uracil hydrolyase)|298 AA	149100000	56014000	22696000	36551000	60103000	0	241670000	215240000	130420000	118.702	43.295	16.184	113.478	183.306	0	75.439	61.107	40.284
Rv3799c|accD4|Probable propionyl-CoA carboxylase beta chain 4 AccD4 (pccase) (propanoyl-CoA:carbon dioxide ligase)|522 AA	636890000	1362600000	526420000	0	412950000	326330000	663950000	709220000	939410000	507.044	1053.2	375.375	0	1259.44	1243.24	207.257	201.348	290.161
Rv1239c|corA|Possible magnesium and cobalt transport transmembrane protein CorA|366 AA	142320000	86864000	132070000	0	134760000	97173000	299760000	441040000	307320000	113.305	67.14	94.175	0	410.999	370.207	93.572	125.212	94.924
Rv2595|vapB40|Possible antitoxin VapB40|81 AA	65550000	0	0	47837000	0	30875000	177800000	158160000	153770000	52.186	0	0	148.517	0	117.627	55.502	44.902	47.496
Rv0560c|Rv0560c|Possible benzoquinone methyltransferase (methylase)|241 AA	132050000	47970000	0	0	67089000	19302000	170550000	253590000	90778000	105.128	37.078	0	0	204.612	73.536	53.238	71.994	28.039
Rv2724c|fadE20|Probable acyl-CoA dehydrogenase FadE20|386 AA	100120000	76875000	0	0	318720000	123420000	313330000	821770000	446300000	79.708	59.42	0	0	972.052	470.202	97.808	233.301	137.851
Rv3852|hns|Possible histone-like protein Hns|134 AA	402090000	174840000	449720000	205720000	320790000	0	409430000	802730000	688710000	320.114	135.14	320.683	638.686	978.365	0	127.806	227.896	212.726
Rv0316|Rv0316|Possible muconolactone isomerase|204 AA	65627000	0	168480000	0	69651000	16162000	171810000	156330000	144340000	52.247	0	120.138	0	212.426	61.574	53.632	44.382	44.583
Rv2257c|Rv2257c|Conserved protein|272 AA	0	39964000	0	0	107220000	10862000	105930000	161740000	236930000	0	30.89	0	0	327.006	41.382	33.067	45.918	73.182
Rv2359|zur|Probable zinc uptake regulation protein Zur|130 AA	151920000	161830000	130150000	101870000	108510000	0	133580000	585900000	506300000	120.947	125.084	92.806	316.27	330.941	0	41.698	166.337	156.384
Rv1326c|glgB|1	26681000	143670000	65024000	17848000	129170000	0	104860000	329100000	239080000	21.241	111.048	46.367	55.412	393.951	0	32.733	93.432	73.846
Rv2850c|Rv2850c|Possible magnesium chelatase|629 AA	76408000	99925000	100030000	0	149670000	28424000	239940000	296210000	234470000	60.83	77.236	71.329	0	456.473	108.289	74.899	84.094	72.422
Rv0877|Rv0877|Conserved hypothetical protein|262 AA	191300000	77012000	47648000	30419000	50034000	0	147740000	205690000	199920000	152.299	59.525	33.976	94.44	152.597	0	46.118	58.396	61.75
Rv1778c|Rv1778c|Unknown protein|149 AA	82777000	0	0	27906000	37982000	0	307830000	121520000	130870000	65.901	0	0	86.638	115.84	0	96.091	34.5	40.423
Rv3408|vapC47|Possible toxin VapC47. Contains PIN domain.|136 AA	0	49009000	39507000	29405000	0	30301000	138950000	173240000	140390000	0	37.881	28.171	91.292	0	115.44	43.374	49.183	43.363
Rv0554|bpoC|Possible peroxidase BpoC (non-haem peroxidase)|262 AA	332560000	271230000	203010000	0	189320000	91870000	352500000	532530000	395180000	264.759	209.644	144.761	0	577.4	350.004	110.035	151.186	122.062
Rv1501|Rv1501|Conserved hypothetical protein|273 AA	53374000	0	0	0	58024000	16179000	155550000	151280000	177230000	42.492	0	0	0	176.965	61.638	48.556	42.948	54.742
Rv2697c|dut|Probable deoxyuridine 5-triphosphate nucleotidohydrolase Dut (dUTPase) (dUTP pyrophosphatase) (deoxyuridine 5-triphosphatase) (dUTP diphosphatase) (deoxyuridine-triphosphatase)|154 AA	90907000	0	146940000	0	36022000	169500000	227820000	219620000	564010000	72.373	0	104.779	0	109.862	645.756	71.116	62.35	174.209
Rv3227|aroA|3-phosphoshikimate 1-carboxyvinyltransferase AroA (5-enolpyruvylshikimate-3-phosphate synthase) (EPSP synthase) (EPSPS)|450 AA	193000000	136520000	446780000	330580000	0	75922000	357480000	494120000	523660000	153.652	105.521	318.586	1026.33	0	289.245	111.59	140.281	161.746
Rv3079c|Rv3079c|Conserved protein|275 AA	0	34007000	96108000	31954000	16686000	0	190710000	197600000	69078000	0	26.285	68.532	99.206	50.89	0	59.531	56.099	21.337
Rv1422|Rv1422|Conserved hypothetical protein|342 AA	130190000	99162000	94719000	0	52877000	41237000	226100000	283730000	159880000	103.648	76.646	67.541	0	161.268	157.104	70.579	80.551	49.383
Rv0174|mce1F|Mce-family protein Mce1F|515 AA	259680000	97312000	165730000	62011000	175220000	0	406580000	368740000	394590000	206.738	75.216	118.177	192.522	534.397	0	126.917	104.686	121.879
Rv2394|ggtB|Probable gamma-glutamyltranspeptidase precursor GgtB (gamma-glutamyltransferase) (glutamyl transpeptidase)|643 AA	464410000	401140000	434660000	131680000	141890000	0	353580000	580270000	480730000	369.728	310.056	309.944	408.819	432.745	0	110.372	164.739	148.486
Rv1143|mcr|Probable alpha-methylacyl-CoA racemase Mcr (2-methylacyl-CoA racemase) (2-arylpropionyl-CoA epimerase )|360 AA	256640000	93961000	220760000	74351000	94074000	0	222300000	320980000	527170000	204.318	72.626	157.418	230.833	286.913	0	69.392	91.126	162.83
Rv1556|Rv1556|Possible regulatory protein|202 AA	0	0	35389000	53300000	0	47657000	256500000	256150000	176370000	0	0	25.235	165.477	0	181.562	80.068	72.721	54.476
Rv3916c|Rv3916c|Conserved hypothetical protein|244 AA	0	0	0	13350000	0	14062000	180450000	122900000	40895000	0	0	0	41.447	0	53.573	56.329	34.891	12.631
Rv3863|Rv3863|Unknown alanine rich protein|392 AA	115020000	0	67884000	90500000	97952000	0	271220000	404420000	448250000	91.57	0	48.406	280.97	298.74	0	84.663	114.815	138.454
Rv3609c|folE|GTP cyclohydrolase I FolE (GTP-ch-I)|202 AA	186730000	168700000	89829000	0	41718000	65067000	262760000	214680000	278090000	148.66	130.394	64.055	0	127.234	247.89	82.022	60.948	85.895
Rv3853|rraA|Regulator of RNase E activity a RraA|157 AA	95779000	0	96054000	108150000	171040000	0	246250000	522760000	859280000	76.252	0	68.493	335.767	521.648	0	76.869	148.412	265.411
Rv1165|typA|Possible GTP-binding translation elongation factor TypA (tyrosine phosphorylated protein A) (GTP-binding protein)|628 AA	160750000	134320000	185620000	0	187070000	112040000	341650000	986480000	318490000	127.977	103.821	132.36	0	570.538	426.847	106.648	280.062	98.374
Rv3909|Rv3909|Conserved protein|802 AA	37258000	38516000	92410000	28770000	0	58470000	162720000	273450000	189230000	29.662	29.77	65.895	89.32	0	222.757	50.794	77.633	58.449
Rv3168|Rv3168|Putative aminoglycoside phosphotransferase|378 AA	63422000	110360000	456850000	58804000	0	32404000	181430000	220540000	248620000	50.492	85.301	325.767	182.565	0	123.452	56.635	62.611	76.793
Rv2788|sirR|Probable transcriptional repressor SirR|228 AA	27759000	0	441430000	0	71308000	28416000	237210000	199060000	259650000	22.1	0	314.771	0	217.48	108.258	74.047	56.513	80.2
Rv1538c|ansA|Probable L-aparaginase AnsA|326 AA	0	66892000	87272000	40680000	0	74613000	170010000	263050000	353040000	0	51.703	62.231	126.297	0	284.258	53.07	74.68	109.045
Rv2789c|fadE21|Probable acyl-CoA dehydrogenase FadE21|410 AA	203310000	210280000	334860000	44208000	31681000	0	276660000	185720000	176380000	161.86	162.533	238.779	137.25	96.623	0	86.361	52.726	54.48
Rv1722|Rv1722|Possible carboxylase|494 AA	0	0	230300000	0	50984000	62721000	257870000	589050000	119410000	0	0	164.221	0	155.494	238.953	80.496	167.232	36.883
Rv1445c|devB|Probable 6-phosphogluconolactonase DevB (6PGL)|247 AA	228980000	78184000	82803000	38216000	150780000	0	267760000	454030000	308960000	182.297	60.431	59.045	118.647	459.858	0	83.583	128.899	95.43
Rv2754c|thyX|Probable thymidylate synthase ThyX (ts) (TSase)|250 AA	111720000	188720000	136070000	0	224820000	48744000	530750000	530700000	271870000	88.943	145.869	97.028	0	685.67	185.703	165.677	150.666	83.974
Rv2149c|yfiH|Conserved protein YfiH|250 AA	189000000	140250000	218860000	0	78944000	19805000	204510000	283240000	181050000	150.468	108.404	156.063	0	240.768	75.453	63.839	80.412	55.922
Rv2748c|ftsK|Possible cell division transmembrane protein FtsK|883 AA	82330000	156480000	106900000	55659000	0	140510000	271020000	506040000	322240000	65.545	120.949	76.227	172.801	0	535.311	84.601	143.665	99.532
Rv2548A|Rv2548A|Conserved protein|124 AA	77712000	37334000	99020000	24139000	37724000	0	132430000	144910000	362180000	61.868	28.857	70.608	74.943	115.053	0	41.339	41.14	111.869
Rv0029|Rv0029|Conserved hypothetical protein|365 AA	28317000	192890000	92080000	17900000	0	5867000	104400000	161550000	41877000	22.544	149.092	65.66	55.573	0	22.352	32.589	45.864	12.935
Rv2676c|Rv2676c|Conserved protein|231 AA	486720000	639830000	734920000	231080000	0	253740000	582650000	754030000	833730000	387.49	494.548	524.051	717.42	0	966.691	181.878	214.07	257.519
Rv0974c|accD2|Probable acetyl-/propionyl-CoA carboxylase (beta subunit) AccD2|529 AA	0	42257000	0	0	22944000	25269000	119610000	225610000	161510000	0	32.662	0	0	69.976	96.269	37.337	64.051	49.887
Rv0794c|Rv0794c|Probable oxidoreductase|499 AA	22327000	213640000	155440000	85263000	0	43794000	308490000	328900000	271900000	17.775	165.13	110.84	264.711	0	166.845	96.297	93.375	83.983
Rv2942|mmpL7|Conserved transmembrane transport protein MmpL7|920 AA	204420000	85502000	118220000	53781000	0	44193000	199220000	308950000	288470000	162.744	66.088	84.299	166.971	0	168.365	62.188	87.711	89.101
Rv2404c|lepA|Probable GTP-binding protein LepA (GTP-binding elongation factor)|653 AA	229200000	44577000	135030000	0	71971000	48298000	346080000	346570000	253010000	182.472	34.455	96.286	0	219.502	184.004	108.031	98.391	78.149
Rv0140|Rv0140|Conserved protein|126 AA	306920000	303900000	318360000	33383000	126950000	0	499610000	323640000	257950000	244.347	234.896	227.014	103.642	387.18	0	155.957	91.882	79.675
Rv1680|Rv1680|Hypothetical protein|274 AA	262300000	341240000	202060000	264610000	83998000	0	77875000	1496600000	1444400000	208.824	263.757	144.083	821.519	256.182	0	24.309	424.886	446.14
Rv1867|Rv1867|Conserved protein|494 AA	88968000	128420000	28281000	0	17535000	34483000	174030000	175730000	191060000	70.83	99.261	20.166	0	53.479	131.372	54.325	49.89	59.014
Rv0120c|fusA2|Probable elongation factor G FusA2 (EF-G)|714 AA	740540000	545590000	336760000	175560000	0	47390000	804630000	198230000	510230000	589.563	421.707	240.134	545.051	0	180.545	251.171	56.278	157.598
Rv0760c|Rv0760c|Conserved protein|139 AA	376310000	0	338250000	0	215010000	91486000	699020000	600630000	491610000	299.59	0	241.197	0	655.751	348.541	218.204	170.519	151.846
Rv2096c|pafB|Proteasome accessory factor B PafB|332 AA	75299000	83369000	254760000	90868000	52076000	0	402500000	292370000	450830000	59.947	64.439	181.662	282.112	158.825	0	125.643	83.004	139.25
Rv2999|lppY|Probable conserved lipoprotein LppY|321 AA	30092000	88574000	0	18113000	27593000	0	107440000	253580000	189390000	23.957	68.462	0	56.234	84.155	0	33.538	71.992	58.498
Rv3414c|sigD|Probable alternative RNA polymerase sigma-D factor SigD|212 AA	0	0	33823000	79759000	0	17971000	154890000	442510000	212740000	0	0	24.118	247.623	0	68.465	48.35	125.629	65.71
Rv3556c|fadA6|Probable acetyl-CoA acetyltransferase FadA6 (acetoacetyl-CoA thiolase)|386 AA	174340000	391050000	239340000	104180000	355000000	0	992350000	802910000	657080000	138.796	302.257	170.667	323.441	1082.7	0	309.769	227.947	202.956
Rv3141|fadB4|Probable NADPH quinone oxidoreductase FadB4 (NADPH:quinone reductase) (zeta-crystallin)|323 AA	372710000	396870000	323820000	70434000	0	121150000	180240000	843220000	503620000	296.724	306.756	230.907	218.672	0	461.554	56.263	239.391	155.556
Rv2327|Rv2327|Conserved protein|163 AA	93860000	0	58288000	46190000	227300000	0	267070000	971770000	489630000	74.724	0	41.564	143.403	693.234	0	83.368	275.886	151.235
Rv3586|Rv3586|Conserved hypothetical protein|358 AA	76641000	68219000	238550000	51254000	106260000	0	255200000	766910000	336840000	61.016	52.729	170.103	159.125	324.078	0	79.662	217.726	104.042
Rv1854c|ndh|Probable NADH dehydrogenase Ndh|463 AA	109560000	180850000	169470000	0	153620000	128820000	459890000	806220000	678610000	87.223	139.786	120.844	0	468.52	490.775	143.558	228.886	209.606
Rv0903c|prrA|Two component response transcriptional regulatory protein PrrA|236 AA	154130000	393380000	396570000	201940000	165850000	0	665630000	866530000	823510000	122.707	304.058	282.783	626.951	505.82	0	207.781	246.008	254.362
Rv1876|bfrA|Probable bacterioferritin BfrA|159 AA	376060000	327990000	406450000	42282000	0	98372000	327680000	483040000	291380000	299.391	253.516	289.828	131.27	0	374.775	102.288	137.135	90
Rv3432c|gadB|Probable glutamate decarboxylase GadB|460 AA	199600000	155560000	223110000	88113000	117110000	0	580650000	503870000	534210000	158.907	120.238	159.094	273.559	357.169	0	181.254	143.049	165.005
Rv2720|lexA|Repressor LexA|236 AA	196920000	219640000	220680000	0	432670000	77802000	382800000	1263400000	836950000	156.773	169.768	157.361	0	1319.58	296.408	119.494	358.68	258.514
Rv3818|Rv3818|Unknown protein|516 AA	335710000	573860000	64241000	0	108760000	37110000	396860000	405640000	357470000	267.267	443.558	45.808	0	331.703	141.381	123.883	115.161	110.414
Rv0863|Rv0863|Conserved hypothetical protein|93 AA	84127000	1138100000	1172400000	133600000	196250000	0	562050000	875740000	826800000	66.976	879.68	836.006	414.78	598.535	0	175.448	248.623	255.378
Rv2493|vapB38|Possible antitoxin VapB38|73 AA	189410000	214360000	241040000	75092000	0	78044000	534060000	614090000	215980000	150.794	165.687	171.879	233.134	0	297.33	166.711	174.341	66.711
Rv1079|metB|Cystathionine gamma-synthase MetB (CGS) (O-succinylhomoserine [thiol]-lyase)|388 AA	562430000	356160000	989190000	210510000	0	178810000	701590000	939670000	684740000	447.765	275.289	705.364	653.558	0	681.225	219.006	266.773	211.5
Rv2238c|ahpE|Probable peroxiredoxin AhpE|153 AA	369920000	141180000	114650000	127760000	0	192740000	592020000	642900000	820020000	294.503	109.123	81.754	396.649	0	734.295	184.803	182.52	253.284
Rv2674|msrB|Probable peptide methionine sulfoxide reductase MsrB (protein-methionine-R-oxide reductase) (peptide met(O) reductase)|136 AA	0	66922000	0	53072000	0	36522000	222580000	360220000	409710000	0	51.726	0	164.769	0	139.14	69.48	102.267	126.549
Rv3245c|mtrB|Two component sensory transduction histidine kinase MtrB|567 AA	15489000	0	0	17336000	27025000	0	222480000	699880000	52589000	12.331	0	0	53.822	82.423	0	69.449	198.696	16.243
Rv2603c|Rv2603c|Highly conserved protein|251 AA	657700000	695720000	525700000	0	47663000	75481000	406130000	343940000	532090000	523.612	537.748	374.862	0	145.366	287.565	126.776	97.645	164.35
Rv1397c|vapC10|Possible toxin VapC10|133 AA	0	226490000	0	0	118920000	77451000	1002400000	331670000	665020000	0	175.063	0	0	362.69	295.071	312.906	94.161	205.409
Rv0686|Rv0686|Probable membrane protein|265 AA	427500000	177450000	86293000	59346000	23782000	0	177340000	416960000	372550000	340.344	137.158	61.533	184.248	72.532	0	55.358	118.375	115.072
Rv3093c|Rv3093c|Hypothetical oxidoreductase|334 AA	124560000	300330000	256840000	75860000	261250000	0	749470000	846800000	715460000	99.165	232.136	183.145	235.518	796.777	0	233.952	240.407	220.988
Rv0054|ssb|Single-strand binding protein Ssb (helix-destabilizing protein)|164 AA	507270000	489530000	1763100000	0	409550000	955100000	847520000	3274000000	2293500000	403.85	378.376	1257.22	0	1249.07	3638.71	264.559	929.491	708.407
Rv2097c|pafA|Proteasome accessory factor a PafA|452 AA	274730000	596140000	219950000	232710000	0	126480000	665530000	967120000	784360000	218.719	460.779	156.84	722.481	0	481.86	207.75	274.566	242.27
Rv0404|fadD30|Fatty-acid-AMP ligase FadD30 (fatty-acid-AMP synthetase) (fatty-acid-AMP synthase)|585 AA	83901000	41917000	438230000	65946000	0	27470000	315460000	525770000	208130000	66.796	32.399	312.49	204.739	0	104.654	98.473	149.266	64.286
Rv3604c|Rv3604c|Probable conserved transmembrane protein rich in alanine and arginine and proline|397 AA	111710000	43491000	109450000	0	247400000	29607000	801240000	566910000	400520000	88.935	33.616	78.046	0	754.536	112.796	250.113	160.946	123.711
Rv1377c|Rv1377c|Putative transferase|212 AA	240420000	160740000	60726000	64385000	0	25969000	456400000	318500000	254510000	191.404	124.242	43.302	199.892	0	98.936	142.468	90.422	78.612
Rv1175c|fadH|Probable NADPH dependent 2	246240000	310210000	347190000	21617000	124040000	0	370080000	388560000	462040000	196.038	239.773	247.572	67.113	378.305	0	115.523	110.312	142.713
Rv0078A|Rv0078A|Hypothetical protein|197 AA	240970000	246820000	60380000	60016000	0	36331000	476600000	415540000	238990000	191.842	190.776	43.055	186.328	0	138.413	148.774	117.972	73.818
Rv3882c|eccE1|ESX conserved component EccE1. ESX-1 type VII secretion system protein. Possible membrane protein.|462 AA	89214000	0	130420000	0	209430000	21346000	526340000	524890000	407460000	71.026	0	92.999	0	638.733	81.323	164.301	149.017	125.855
Rv2766c|Rv2766c|Probable short-chain type dehydrogenase/reductase|260 AA	867890000	743580000	644390000	286600000	0	256110000	827260000	1523700000	1076500000	690.949	574.74	459.497	889.79	0	975.72	258.235	432.579	332.505
Rv2750|Rv2750|Probable dehydrogenase|272 AA	98619000	152380000	67259000	62789000	0	19851000	315900000	299390000	323190000	78.513	117.78	47.961	194.937	0	75.628	98.61	84.997	99.826
Rv1637c|Rv1637c|Conserved protein|264 AA	79140000	82726000	93936000	124880000	0	116510000	1357300000	732890000	341530000	63.005	63.942	66.983	387.707	0	443.876	423.691	208.068	105.49
Rv3777|Rv3777|Probable oxidoreductase|328 AA	32978000	202240000	91696000	57422000	0	48859000	667010000	254470000	447760000	26.255	156.319	65.386	178.275	0	186.142	208.212	72.244	138.302
Rv1676|Rv1676|Unknown protein|234 AA	212680000	362880000	288170000	68796000	0	108190000	627820000	560130000	498940000	169.32	280.483	205.486	213.587	0	412.179	195.978	159.021	154.11
Rv2981c|ddlA|Probable D-alanine--D-alanine ligase DdlA (D-alanylalanine synthetase) (D-ala-D-ala ligase)|373 AA	169610000	135040000	180880000	214790000	0	56181000	407720000	787310000	809320000	135.031	104.377	128.981	666.846	0	214.037	127.273	223.518	249.979
Rv1063c|Rv1063c|Conserved hypothetical protein|360 AA	224700000	98996000	278560000	0	60940000	112890000	810270000	339880000	849760000	178.889	76.518	198.633	0	185.859	430.085	252.931	96.492	262.47
Rv1496|Rv1496|Possible transport system kinase|334 AA	70832000	70173000	43767000	24526000	0	33288000	156290000	457950000	274380000	56.391	54.239	31.209	76.144	0	126.82	48.787	130.012	84.749
Rv0412c|Rv0412c|Possible conserved membrane protein|439 AA	90465000	39813000	41770000	0	61888000	66864000	573780000	460080000	485020000	72.021	30.773	29.785	0	188.75	254.737	179.109	130.617	149.811
Rv1020|mfd|Probable transcription-repair coupling factor Mfd (TRCF)|1234 AA	71052000	74666000	152530000	0	71785000	24526000	475800000	423660000	265880000	56.566	57.712	108.765	0	218.934	93.438	148.524	120.277	82.124
Rv0818|Rv0818|Transcriptional regulatory protein|255 AA	428930000	978030000	363070000	156730000	0	92981000	736210000	658830000	779700000	341.482	755.956	258.895	486.59	0	354.236	229.813	187.042	240.83
Rv1559|ilvA|Probable threonine dehydratase IlvA|429 AA	285950000	102370000	230980000	96733000	0	200380000	696260000	778990000	926980000	227.652	79.126	164.705	300.321	0	763.402	217.342	221.156	286.322
Rv0926c|Rv0926c|Conserved hypothetical protein|358 AA	25092000	155230000	0	0	162620000	41023000	521760000	567820000	827050000	19.976	119.983	0	0	495.969	156.288	162.871	161.204	255.456
Rv1265|Rv1265|Unknown protein|226 AA	275550000	573400000	709810000	14833000	73018000	0	348920000	393390000	284410000	219.372	443.202	506.146	46.051	222.695	0	108.918	111.684	87.847
Rv3633|Rv3633|Conserved protein|291 AA	285220000	172110000	213930000	52691000	0	33215000	400560000	395520000	373380000	227.071	133.03	152.548	163.587	0	126.542	125.038	112.288	115.328
Rv3400|Rv3400|Probable hydrolase|262 AA	281060000	358060000	598910000	0	70336000	282810000	1098300000	907000000	775790000	223.759	276.758	427.066	0	214.515	1077.44	342.842	257.498	239.623
Rv0161|Rv0161|Possible oxidoreductase|449 AA	388540000	301760000	359760000	57982000	0	54743000	279830000	598960000	583660000	309.326	233.241	256.535	180.013	0	208.558	87.351	170.045	180.278
Rv3045|adhC|Probable NADP-dependent alcohol dehydrogenase AdhC|346 AA	2004100000	2424700000	2985600000	0	931540000	489360000	2773600000	2734700000	2607600000	1595.51	1874.14	2128.95	0	2841.07	1864.35	865.798	776.383	805.424
Rv1820|ilvG|Probable acetolactate synthase IlvG (acetohydroxy-acid synthase)(ALS)|547 AA	354150000	365030000	862970000	35653000	76407000	0	705960000	428120000	386880000	281.948	282.145	615.36	110.69	233.031	0	220.37	121.544	119.498
Rv3272|Rv3272|Conserved hypothetical protein|394 AA	146940000	237680000	98131000	0	42699000	17040000	620660000	227820000	221210000	116.983	183.712	69.974	0	130.226	64.918	193.743	64.678	68.326
Rv3241c|Rv3241c|Conserved protein|214 AA	128280000	450830000	74981000	125550000	0	70995000	686330000	660360000	660430000	102.127	348.463	53.467	389.788	0	270.475	214.243	187.477	203.991
Rv2194|qcrC|Probable ubiquinol-cytochrome C reductase QcrC (cytochrome C subunit)|280 AA	361700000	201420000	151640000	0	62178000	110810000	1000200000	928340000	311630000	287.958	155.685	108.13	0	189.634	422.161	312.219	263.556	96.255
Rv3214|gpm2|Possible phosphoglycerate mutase Gpm2 (phosphoglyceromutase) (PGAM) (BPG-dependent PGAM)|203 AA	378290000	125470000	490100000	0	66714000	24563000	261750000	459790000	560150000	301.166	96.98	349.477	0	203.469	93.579	81.707	130.535	173.017
Rv3915|Rv3915|Probable peptidoglycan hydrolase|406 AA	177820000	434540000	135790000	29941000	38793000	0	163230000	506940000	590490000	141.567	335.872	96.828	92.956	118.313	0	50.953	143.921	182.388
Rv2230c|Rv2230c|Conserved protein|379 AA	0	120020000	166980000	0	86221000	23936000	436310000	483620000	438970000	0	92.768	119.069	0	262.962	91.191	136.197	137.3	135.587
Rv3528c|Rv3528c|Unknown protein|237 AA	367000000	524910000	1561800000	295190000	0	259010000	648040000	2744900000	1270400000	292.178	405.722	1113.68	916.459	0	986.769	202.29	779.279	392.396
Rv0357c|purA|Probable adenylosuccinate synthetase PurA (imp--aspartate ligase) (ADSS) (ampsase)|432 AA	105390000	296450000	510330000	0	111790000	76942000	662560000	652670000	1029800000	83.904	229.137	363.902	0	340.944	293.131	206.823	185.293	318.08
Rv0898c|Rv0898c|Conserved hypothetical protein|87 AA	221100000	366420000	82211000	177810000	0	110970000	1046700000	1056000000	715830000	176.023	283.22	58.622	552.036	0	422.77	326.735	299.799	221.103
Rv1257c|Rv1257c|Probable oxidoreductase|455 AA	155660000	204770000	165770000	0	51563000	47678000	458480000	591090000	449580000	123.925	158.274	118.206	0	157.26	181.642	143.118	167.811	138.864
Rv3465|rmlC|dTDP-4-dehydrorhamnose 3	42129000	136280000	200750000	0	12199000	90072000	258980000	491060000	406490000	33.54	105.336	143.149	0	37.205	343.154	80.842	139.412	125.555
Rv1886c|fbpB|Secreted antigen 85-B FbpB (85B) (antigen 85 complex B) (mycolyl transferase 85B) (fibronectin-binding protein B) (extracellular alpha-antigen)|325 AA	914780000	1499100000	1846900000	190690000	0	151590000	761040000	1178300000	1296600000	728.279	1158.71	1316.97	592.024	0	577.523	237.564	334.52	400.488
Rv3281|accE5|Probable bifunctional protein acetyl-/propionyl-coenzyme A carboxylase (epsilon chain) AccE5|177 AA	241420000	477930000	442030000	83598000	161110000	0	700330000	1141500000	937110000	192.201	369.41	315.199	259.542	491.363	0	218.613	324.073	289.451
Rv0234c|gabD1|Succinate-semialdehyde dehydrogenase [NADP+] dependent (SSDH) GabD1|511 AA	351040000	310220000	455740000	51601000	25096000	0	407260000	403810000	441680000	279.472	239.781	324.976	160.203	76.539	0	127.129	114.642	136.424
Rv2392|cysH|Probable 3-phosphoadenosine 5-phosphosulfate reductase CysH (PAPS reductase	967530000	814440000	782820000	218670000	65041000	0	1035900000	852260000	1009400000	770.275	629.511	558.207	678.892	198.366	0	323.363	241.957	311.779
Rv2538c|aroB|3-dehydroquinate synthase AroB|362 AA	273750000	60995000	0	48379000	72098000	0	418330000	706050000	643500000	217.939	47.145	0	150.199	219.889	0	130.585	200.448	198.762
Rv1698|mctB|Outer membrane protein MctB|314 AA	54783000	162630000	273600000	46700000	19284000	0	331180000	491750000	300870000	43.614	125.703	195.097	144.987	58.814	0	103.38	139.608	92.931
Rv0583c|lpqN|Probable conserved lipoprotein LpqN|228 AA	184270000	124210000	282520000	145290000	63105000	0	896660000	1029800000	600080000	146.702	96.007	201.457	451.073	192.462	0	279.899	292.361	185.35
Rv1416|ribH|Probable riboflavin synthase beta chain RibH (6	171220000	170860000	317830000	215420000	0	26504000	516910000	625270000	888710000	136.313	132.064	226.636	668.801	0	100.974	161.357	177.515	274.501
Rv1284|canA|Beta-carbonic anhydrase|163 AA	800700000	967700000	2078100000	405870000	0	620210000	2681000000	2184700000	2220700000	637.457	747.971	1481.84	1260.08	0	2362.86	836.893	620.238	685.92
Rv2721c|Rv2721c|Possible conserved transmembrane alanine and glycine rich protein|699 AA	839660000	1302800000	851210000	0	347330000	391640000	1851000000	2146100000	2356600000	668.474	1006.98	606.974	0	1059.31	1492.06	577.802	609.279	727.897
Rv3276c|purK|Probable phosphoribosylaminoimidazole carboxylase ATPase subunit PurK (air carboxylase) (AIRC)|429 AA	415520000	734960000	334620000	0	195680000	48011000	842510000	746990000	1065900000	330.806	568.078	238.608	0	596.797	182.911	262.995	212.071	329.231
Rv3143|Rv3143|Probable response regulator|133 AA	491430000	666510000	754980000	119630000	0	83431000	1141400000	693740000	776150000	391.24	515.17	538.355	371.408	0	317.853	356.296	196.953	239.734
Rv1795|eccD5|ESX conserved component EccD5. ESX-5 type VII secretion system protein. Probable membrane protein.|503 AA	730660000	561140000	272910000	148780000	0	262410000	815120000	1523000000	1660300000	581.697	433.726	194.605	461.908	0	999.722	254.445	432.381	512.826
Rv2858c|aldC|Probable aldehyde dehydrogenase AldC|455 AA	256880000	144400000	358060000	0	60936000	46608000	627080000	653030000	499330000	204.509	111.612	255.323	0	185.846	177.566	195.747	185.396	154.231
Rv1732c|Rv1732c|Conserved protein|182 AA	206760000	279680000	646000000	0	37398000	32211000	495790000	387760000	466290000	164.607	216.175	460.645	0	114.059	122.717	154.764	110.085	144.026
Rv3256c|Rv3256c|Conserved protein|346 AA	177080000	398000000	637810000	78017000	115380000	0	392920000	1739500000	861900000	140.978	307.629	454.805	242.215	351.893	0	122.653	493.845	266.22
Rv0068|Rv0068|Probable oxidoreductase|303 AA	430260000	482000000	325910000	0	89501000	173370000	600370000	1322700000	1350400000	342.541	372.556	232.397	0	272.966	660.5	187.41	375.515	417.106
Rv3584|lpqE|Possible conserved lipoprotein LpqE|182 AA	1465000000	914830000	1030700000	275760000	0	223370000	1549900000	1648000000	1553900000	1166.32	707.106	734.964	856.135	0	850.989	483.812	467.868	479.962
Rv3772|hisC2|Probable histidinol-phosphate aminotransferase HisC2 (imidazole acetol-phosphate transaminase) (imidazolylacetolphosphate aminotransferase)|353 AA	316370000	248260000	204180000	30990000	0	36631000	494090000	374450000	469530000	251.87	191.889	145.595	96.213	0	139.556	154.234	106.307	145.026
Rv0474|Rv0474|Probable transcriptional regulatory protein|140 AA	158480000	182820000	220660000	0	99643000	48898000	533600000	902200000	800920000	126.17	141.308	157.347	0	303.897	186.29	166.567	256.135	247.385
Rv2346c|esxO|Putative ESAT-6 like protein EsxO (ESAT-6 like protein 6)|94 AA	1738900000	1054300000	846510000	0	89427000	151500000	1106200000	1122400000	986180000	1384.38	814.907	603.623	0	272.74	577.18	345.308	318.65	304.607
Rv1978|Rv1978|Conserved protein|282 AA	739190000	168900000	548670000	112810000	231320000	0	968850000	1636900000	1587300000	588.488	130.549	391.241	350.234	705.494	0	302.433	464.717	490.279
Rv1594|nadA|Probable quinolinate synthetase NadA|349 AA	579230000	739810000	191760000	150530000	480740000	0	1483000000	2243200000	2089100000	461.14	571.827	136.739	467.341	1466.19	0	462.929	636.846	645.272
Rv3918c|parA|Probable chromosome partitioning protein ParA|347 AA	276160000	0	228820000	0	80228000	35607000	529900000	668690000	772820000	219.858	0	163.165	0	244.684	135.655	165.412	189.842	238.705
Rv2118c|Rv2118c|RNA methyltransferase|280 AA	262790000	181680000	221590000	38776000	48242000	0	542520000	576990000	595460000	209.214	140.427	158.01	120.386	147.131	0	169.351	163.808	183.923
Rv3396c|guaA|Probable GMP synthase [glutamine-hydrolyzing] GuaA (glutamine amidotransferase) (GMP synthetase)|525 AA	660780000	65634000	437110000	293800000	0	259270000	1851200000	2025400000	1692400000	526.064	50.731	311.691	912.143	0	987.759	577.865	575.012	522.741
Rv2581c|Rv2581c|Possible glyoxalase II (hydroxyacylglutathione hydrolase) (GLX II)|224 AA	463390000	45261000	0	0	205600000	49509000	738080000	1183200000	1156800000	368.916	34.984	0	0	627.052	188.618	230.397	335.911	357.307
Rv3339c|icd1|Probable isocitrate dehydrogenase [NADP] Icd1 (oxalosuccinate decarboxylase) (IDH) (NADP+-specific ICDH) (IDP)|409 AA	35947000	0	1351800000	39942000	0	22723000	366610000	555110000	394270000	28.618	0	963.931	124.006	0	86.569	114.44	157.596	121.78
Rv0823c|Rv0823c|Possible transcriptional regulatory protein|389 AA	0	0	0	16309000	25915000	0	197030000	432860000	510780000	0	0	0	50.634	79.037	0	61.504	122.889	157.768
Rv3575c|Rv3575c|Transcriptional regulatory protein (probably LacI-family)|359 AA	94015000	247300000	303560000	0	193210000	12812000	701160000	523550000	776380000	74.848	191.147	216.46	0	589.264	48.811	218.872	148.636	239.805
Rv3409c|choD|Cholesterol oxidase ChoD (cholesterol-O2 oxidoreductase)|578 AA	47664000	40300000	143040000	40756000	0	41356000	726990000	542320000	434610000	37.947	31.149	101.998	126.533	0	157.557	226.935	153.965	134.24
Rv2054|Rv2054|Conserved protein|237 AA	159340000	520450000	787790000	215130000	0	230260000	1404500000	1939900000	1583700000	126.855	402.275	561.751	667.901	0	877.238	438.424	550.739	489.167
Rv0972c|fadE12|Acyl-CoA dehydrogenase FadE12|388 AA	0	138230000	120130000	0	23165000	87555000	320520000	1011000000	611790000	0	106.843	85.661	0	70.65	333.564	100.053	287.024	188.967
Rv1794|Rv1794|Conserved protein|300 AA	583060000	828250000	376470000	0	78896000	121210000	884230000	1176500000	1102700000	464.189	640.185	268.45	0	240.622	461.782	276.019	334.009	340.597
Rv1770|Rv1770|Conserved protein|428 AA	283440000	521020000	692900000	69272000	16110000	0	227770000	698870000	788400000	225.654	402.716	494.088	215.065	49.133	0	71.1	198.41	243.518
Rv1919c|Rv1919c|Conserved protein|154 AA	872830000	595960000	152220000	52510000	208770000	0	769620000	1467200000	1223900000	694.882	460.64	108.544	163.025	636.72	0	240.242	416.539	378.033
Rv2780|ald|Secreted L-alanine dehydrogenase Ald (40 kDa antigen) (TB43)|371 AA	84342000	258720000	202660000	694730000	32465000	0	1588500000	1614800000	1228600000	67.147	199.974	144.511	2156.89	99.014	0	495.861	458.443	379.485
Rv1544|Rv1544|Possible ketoacyl reductase|267 AA	955330000	852050000	0	216350000	324560000	0	707670000	3174200000	3289000000	760.562	658.581	0	671.689	989.863	0	220.904	901.157	1015.89
Rv2583c|relA|Probable GTP pyrophosphokinase RelA (ATP:GTP 3- pyrophosphotransferase) (PPGPP synthetase I) ((P)PPGPP synthetase) (GTP diphosphokinase)|790 AA	1069200000	1533300000	107770000	31297000	95905000	0	266430000	1260100000	1074700000	851.217	1185.14	76.848	97.166	292.497	0	83.168	357.743	331.949
Rv1266c|pknH|Probable transmembrane serine/threonine-protein kinase H PknH (protein kinase H) (STPK H)|626 AA	197550000	424900000	554610000	25778000	39634000	0	677810000	541440000	411750000	157.275	328.421	395.477	80.031	120.878	0	211.583	153.715	127.18
Rv3208|Rv3208|Probable transcriptional regulatory protein (probably TetR-family)|228 AA	464180000	186430000	198400000	45219000	0	86114000	754580000	963740000	633600000	369.545	144.099	141.474	140.389	0	328.075	235.547	273.606	195.704
Rv3443c|rplM|50S ribosomal protein L13 RplM|147 AA	44468000	662280000	45216000	0	195560000	35310000	593780000	1111700000	1438000000	35.402	511.901	32.242	0	596.431	134.523	185.353	315.612	444.163
Rv0394c|Rv0394c|Possible secreted protein|239 AA	649940000	213580000	323270000	105490000	0	88092000	994800000	1322000000	789950000	517.434	165.084	230.515	327.508	0	335.61	310.534	375.317	243.996
Rv1612|trpB|Tryptophan synthase	499570000	649150000	1060800000	0	411080000	91702000	1740200000	2055600000	1492700000	397.72	501.752	756.427	0	1253.74	349.364	543.216	583.586	461.059
Rv3850|Rv3850|Conserved protein|218 AA	543840000	281590000	92318000	0	51451000	147140000	961840000	1157100000	1031700000	432.965	217.651	65.829	0	156.918	560.57	300.245	328.501	318.667
Rv0640|rplK|50S ribosomal protein L11 RplK|142 AA	2416400000	610510000	937760000	0	139410000	59082000	1028200000	1303200000	984650000	1923.76	471.886	668.691	0	425.181	225.089	320.96	369.979	304.135
Rv2928|tesA|Probable thioesterase TesA|261 AA	428320000	272200000	398100000	130180000	0	60205000	958910000	1356300000	824100000	340.996	210.393	283.874	404.162	0	229.367	299.33	385.054	254.545
Rv1301|Rv1301|Conserved protein|217 AA	106470000	398030000	828070000	58932000	66555000	0	594550000	1205800000	916160000	84.763	307.652	590.474	182.963	202.984	0	185.593	342.327	282.98
Rv0290|eccD3|ESX conserved component EccD3. ESX-3 type VII secretion system protein. Probable transmembrane protein.|472 AA	393530000	54209000	98855000	282310000	0	139000000	1747800000	1919400000	1758600000	313.299	41.9	70.491	876.471	0	529.558	545.588	544.919	543.189
Rv0933|pstB|Phosphate-transport ATP-binding protein ABC transporter PstB|276 AA	133970000	341040000	133280000	13620000	26987000	0	337740000	483210000	419220000	106.657	263.602	95.038	42.285	82.307	0	105.428	137.184	129.487
Rv3616c|espA|ESX-1 secretion-associated protein A	1656300000	2601400000	1562200000	70779000	0	59312000	1333400000	572810000	1067700000	1318.62	2010.72	1113.96	219.743	0	225.965	416.23	162.621	329.787
Rv0634A|Rv0634A|Unknown protein|83 AA	359520000	530470000	807880000	415540000	28893000	0	1427300000	1526200000	1120700000	286.223	410.02	576.077	1290.1	88.12	0	445.542	433.289	346.157
Rv1130|prpD|Possible methylcitrate dehydratase PrpD|526 AA	11108000	59525000	93931000	0	59376000	26263000	446000000	987980000	615270000	8.843	46.009	66.98	0	181.089	100.056	139.222	280.488	190.042
Rv3151|nuoG|Probable NADH dehydrogenase I (chain G) NuoG (NADH-ubiquinone oxidoreductase chain G)|806 AA	989140000	1973500000	1093700000	196620000	0	341100000	1763600000	2257300000	2781700000	787.479	1525.39	779.887	610.434	0	1299.51	550.52	640.849	859.2
Rv3211|rhlE|Probable ATP-dependent RNA helicase RhlE|527 AA	191030000	423960000	306300000	72969000	0	74858000	1214200000	937430000	1126000000	152.084	327.694	218.414	226.542	0	285.192	379.021	266.137	347.794
Rv0500|proC|Probable pyrroline-5-carboxylate reductase ProC (P5CR) (P5C reductase)|295 AA	699380000	445130000	284940000	0	31890000	72716000	1361400000	689600000	737670000	556.794	344.057	203.183	0	97.26	277.031	424.97	195.778	227.848
Rv1398c|vapB10|Possible antitoxin VapB10|85 AA	299990000	0	137140000	40594000	0	25088000	1005400000	606410000	437380000	238.83	0	97.791	126.03	0	95.58	313.843	172.16	135.096
Rv1896c|Rv1896c|Conserved hypothetical protein|303 AA	55742000	70998000	219070000	20128000	39482000	0	673300000	621900000	563630000	44.378	54.877	156.213	62.49	120.415	0	210.175	176.558	174.092
Rv3407|vapB47|Possible antitoxin VapB47|99 AA	312410000	775990000	446450000	167420000	0	209570000	1989200000	2312700000	1780400000	248.717	599.791	318.351	519.779	0	798.414	620.943	656.577	549.922
Rv1315|murA|Probable UDP-N-acetylglucosamine 1-carboxyvinyltransferase MurA|418 AA	173520000	159930000	30306000	0	78091000	14577000	945720000	735350000	487940000	138.144	123.616	21.61	0	238.167	55.535	295.213	208.766	150.713
Rv1013|pks16|Putative polyketide synthase Pks16|544 AA	163770000	333360000	447060000	0	84188000	96111000	1716600000	1361000000	1135900000	130.381	257.666	318.786	0	256.762	366.161	535.849	386.389	350.852
Rv0433|Rv0433|Conserved hypothetical protein|376 AA	60962000	128480000	181070000	20035000	21425000	0	159420000	196820000	4862400000	48.533	99.307	129.116	62.201	65.343	0	49.764	55.877	1501.88
Rv0821c|phoY2|Probable phosphate-transport system transcriptional regulatory protein PhoY2|213 AA	88130000	19724000	157540000	0	261000000	8649500	1193400000	644040000	1122400000	70.163	15.245	112.337	0	796.014	32.953	372.528	182.843	346.682
Rv1109c|Rv1109c|Conserved protein|212 AA	349690000	414850000	354910000	103260000	0	153870000	1362600000	1871000000	1604000000	278.397	320.653	253.076	320.585	0	586.209	425.345	531.178	495.437
Rv0338c|Rv0338c|Probable iron-sulfur-binding reductase|882 AA	928030000	633400000	1115300000	125260000	126190000	0	1822900000	2143100000	1425400000	738.828	489.578	795.289	388.887	384.862	0	569.031	608.427	440.272
Rv2050|Rv2050|Conserved protein|111 AA	104620000	522590000	771170000	159210000	14659000	0	616480000	1244000000	956140000	83.291	403.929	549.9	494.29	44.708	0	192.439	353.172	295.328
Rv0718|rpsH|30S ribosomal protein S8 RpsH|132 AA	688880000	209560000	990560000	75839000	601160000	0	3430800000	2613900000	2260500000	548.435	161.977	706.341	235.453	1833.45	0	1070.95	742.088	698.214
Rv0361|Rv0361|Probable conserved membrane protein|275 AA	22211000	55039000	162420000	57662000	12805000	0	385610000	760720000	851400000	17.683	42.542	115.817	179.02	39.053	0	120.371	215.969	262.977
Rv3610c|ftsH|Membrane-bound protease FtsH (cell division protein)|760 AA	402720000	528510000	556830000	105990000	0	151950000	1149300000	1980400000	1875900000	320.616	408.505	397.06	329.061	0	578.895	358.762	562.237	579.42
Rv2971|Rv2971|Probable oxidoreductase|282 AA	2138200000	2126600000	2486900000	528280000	358140000	0	4947000000	4461900000	4230800000	1702.28	1643.73	1773.34	1640.12	1092.28	0	1544.24	1266.74	1306.79
Rv3763|lpqH|19 kDa lipoprotein antigen precursor LpqH|159 AA	2419700000	0	2488700000	74848000	0	302100000	2053900000	1701200000	2153000000	1926.38	0	1774.62	232.376	0	1150.93	641.139	482.972	665.01
Rv3464|rmlB|dTDP-glucose 4	1377300000	675890000	279210000	168540000	0	76834000	1001500000	2177500000	1802700000	1096.5	522.42	199.097	523.256	0	292.72	312.625	618.194	556.81
Rv2969c|Rv2969c|Possible conserved membrane or secreted protein|255 AA	217920000	84450000	0	363970000	318010000	0	4934100000	4111600000	3247500000	173.492	65.275	0	1130	969.887	0	1540.21	1167.29	1003.07
Rv2953|Rv2953|Enoyl reductase|418 AA	398010000	769880000	719900000	253890000	241820000	0	3338000000	3868600000	1967600000	316.866	595.069	513.341	788.237	737.518	0	1041.98	1098.3	607.744
Rv3515c|fadD19|Fatty-acid-CoA ligase FadD19 (fatty-acid-CoA synthetase) (fatty-acid-CoA synthase)|548 AA	290550000	170760000	222930000	9687000	0	73688000	589950000	675460000	746110000	231.314	131.987	158.965	30.075	0	280.734	184.157	191.764	230.455
Rv1245c|Rv1245c|Probable short-chain type dehydrogenase/reductase|276 AA	470180000	577600000	1028900000	177410000	0	168350000	1985200000	2389300000	2582300000	374.322	446.448	733.68	550.794	0	641.375	619.694	678.324	797.61
Rv2074|Rv2074|Possible pyridoxamine 5-phosphate oxidase (PNP/PMP oxidase) (pyridoxinephosphate oxidase) (PNPOX) (pyridoxine 5-phosphate oxidase)|137 AA	107110000	0	0	55230000	36615000	0	1265600000	863820000	1065100000	85.273	0	0	171.469	111.671	0	395.066	245.239	328.984
Rv0714|rplN|50S ribosomal protein L14 RplN|122 AA	515730000	182940000	166820000	70170000	0	116740000	2035500000	1076700000	1998900000	410.586	141.401	118.955	217.853	0	444.753	635.395	305.676	617.412
Rv1926c|mpt63|Immunogenic protein Mpt63 (antigen Mpt63/MPB63) (16 kDa immunoprotective extracellular protein)|159 AA	620400000	215560000	304690000	29756000	0	25048000	541180000	1078100000	543380000	493.916	166.614	217.266	92.382	0	95.427	168.933	306.073	167.837
Rv0871|cspB|Probable cold shock-like protein B CspB|135 AA	498520000	1140800000	198050000	89050000	0	127570000	1393400000	2033100000	1624000000	396.884	881.767	141.224	276.468	0	486.012	434.959	577.198	501.614
Rv2211c|gcvT|Probable aminomethyltransferase GcvT (glycine cleavage system T protein)|379 AA	856940000	1125500000	454090000	171660000	0	110860000	1811400000	2149800000	2184800000	682.232	869.941	323.799	532.942	0	422.351	565.441	610.33	674.832
Rv0107c|ctpI|Probable cation-transporter ATPase I CtpI|1632 AA	0	0	0	0	21530000	9323500	1509500000	128420000	864040000	0	0	0	0	65.664	35.52	471.201	36.459	266.881
Rv0715|rplX|50S ribosomal protein L24 RplX|105 AA	327550000	164780000	6520600	14009000	0	118620000	936790000	893400000	1293500000	260.771	127.365	4.65	43.493	0	451.915	292.426	253.637	399.531
Rv3269|Rv3269|Conserved protein|93 AA	3362800000	3950300000	3110100000	847820000	0	848180000	8155100000	5317900000	3797500000	2677.21	3053.33	2217.73	2632.18	0	3231.37	2545.67	1509.76	1172.96
Rv1751|Rv1751|Probable oxidoreductase|460 AA	584880000	773790000	281000000	151470000	0	66808000	2298700000	1980600000	1594900000	465.638	598.091	200.373	470.26	0	254.523	717.555	562.294	492.626
Rv3716c|Rv3716c|Conserved protein|133 AA	2301800000	5558400000	5038100000	0	139960000	491360000	3467200000	4392300000	3456300000	1832.52	4296.29	3592.53	0	426.859	1871.97	1082.31	1246.98	1067.57
Rv3809c|glf|UDP-galactopyranose mutase Glf (UDP-GALP mutase) (NAD+-flavin adenine dinucleotide-requiring enzyme)|399 AA	411210000	196390000	579470000	97895000	0	28250000	981970000	1610700000	1401200000	327.375	151.797	413.204	303.929	0	107.626	306.529	457.279	432.797
Rv0637|hadC|(3R)-hydroxyacyl-ACP dehydratase subunit HadC|166 AA	74298000	177930000	169240000	345430000	0	24175000	2319200000	1919700000	1664500000	59.151	137.529	120.68	1072.44	0	92.101	723.954	545.004	514.124
Rv2838c|rbfA|Probable ribosome-binding factor a RbfA (P15B protein)|183 AA	91428000	131550000	249490000	43751000	26884000	0	1072400000	1115300000	1027900000	72.788	101.68	177.904	135.831	81.992	0	334.757	316.634	317.493
Rv0719|rplF|50S ribosomal protein L6 RplF|179 AA	791750000	909380000	965030000	52061000	0	361590000	4891900000	2146100000	2661700000	630.332	702.893	688.136	161.631	0	1377.58	1527.04	609.279	822.135
Rv2952|Rv2952|Possible methyltransferase (methylase)|270 AA	166470000	593480000	456010000	174050000	108120000	0	2407500000	2975800000	3173700000	132.531	458.723	325.168	540.363	329.751	0	751.518	844.832	980.279
Rv1643|rplT|50S ribosomal protein L20 RplT|129 AA	853100000	675820000	1075800000	53275000	0	274330000	1937500000	2895000000	2332200000	679.174	522.366	767.123	165.4	0	1045.13	604.804	821.892	720.36
Rv2509|Rv2509|Probable short-chain type dehydrogenase/reductase|268 AA	936640000	737670000	1160300000	172200000	177710000	0	3152500000	3836100000	3221500000	745.683	570.172	827.378	534.619	541.991	0	984.075	1089.07	995.043
Rv1391|dfp|Probable DNA/pantothenate metabolism flavoprotein homolog Dfp|418 AA	109760000	267220000	125250000	55875000	11108000	0	1026200000	1007700000	972000000	87.383	206.544	89.312	173.472	33.878	0	320.335	286.087	300.227
Rv0925c|Rv0925c|Conserved protein|245 AA	41180000	340860000	520030000	53522000	36939000	0	2008300000	1034800000	1968300000	32.784	263.463	370.819	166.167	112.659	0	626.905	293.78	607.96
Rv3011c|gatA|Probable glutamyl-tRNA(GLN) amidotransferase (subunit A) GatA (Glu-ADT subunit A)|494 AA	778520000	706240000	582320000	48543000	85147000	0	1456600000	2351200000	2196000000	619.799	545.879	415.236	150.709	259.687	0	454.688	667.507	678.291
Rv0023|Rv0023|Possible transcriptional regulatory protein|256 AA	0	0	0	966220	2310900	0	237720000	152220000	138050000	0	0	0	3	7.048	0	74.206	43.215	42.64
Rv2202c|adoK|Adenosine kinase|324 AA	1604500000	1945500000	2071000000	101610000	0	61607000	2902400000	2843000000	2118300000	1277.38	1503.75	1476.77	315.462	0	234.709	906.004	807.13	654.292
Rv3389c|htdY|Probable 3-hydroxyacyl-thioester dehydratase HtdY|290 AA	3354600000	5676800000	3397700000	187740000	143130000	0	4946500000	4925100000	4577300000	2670.68	4387.81	2422.8	582.865	436.527	0	1544.08	1398.24	1413.82
Rv3846|sodA|Superoxide dismutase [FE] SodA|207 AA	1340900000	1270300000	1661000000	425530000	27084000	0	2232300000	4141800000	3553900000	1067.52	981.862	1184.41	1321.12	82.602	0	696.828	1175.86	1097.71
Rv0884c|serC|Possible phosphoserine aminotransferase SerC (PSAT)|376 AA	1513900000	1497400000	1479200000	27932000	0	231200000	3195300000	2568200000	3108200000	1205.25	1157.4	1054.78	86.719	0	880.819	997.435	729.114	960.048
Rv2945c|lppX|Probable conserved lipoprotein LppX|233 AA	608610000	361900000	594400000	70701000	0	82267000	3079400000	3349800000	1867300000	484.53	279.726	423.85	219.501	0	313.418	961.256	951.01	576.764
Rv2460c|clpP2|Probable ATP-dependent CLP protease proteolytic subunit 2 ClpP2 (endopeptidase CLP 2)|214 AA	1409900000	1741100000	686850000	134310000	0	48955000	2165800000	3438100000	2741500000	1122.46	1345.76	489.774	416.984	0	186.507	676.07	976.079	846.783
Rv0056|rplI|50S ribosomal protein L9 RplI|152 AA	750480000	559840000	1431600000	0	86230000	107360000	3534000000	3883100000	2918200000	597.476	432.721	1020.83	0	262.99	409.017	1103.16	1102.41	901.361
Rv0706|rplV|50S ribosomal protein L22 RplV|197 AA	327340000	322140000	1480200000	11079000	488830000	0	2959300000	3316500000	2866600000	260.604	248.994	1055.49	34.396	1490.86	0	923.766	941.557	885.423
Rv3150|nuoF|Probable NADH dehydrogenase I (chain F) NuoF (NADH-ubiquinone oxidoreductase chain F)|445 AA	776370000	104570000	1634100000	0	33328000	52723000	1847500000	2190400000	2196300000	618.088	80.826	1165.23	0	101.646	200.863	576.71	621.856	678.384
Rv2495c|bkdC|Probable branched-chain keto acid dehydrogenase E2 component BkdC|393 AA	169830000	398240000	307060000	24372000	0	45687000	1277400000	1790300000	2302400000	135.206	307.814	218.956	75.666	0	174.057	398.749	508.267	711.156
Rv2141c|Rv2141c|Conserved protein|448 AA	104940000	250820000	298380000	3526400	3361400	0	482130000	376660000	422570000	83.545	193.868	212.766	10.948	10.252	0	150.5	106.934	130.522
Rv2166c|Rv2166c|Conserved protein|143 AA	78502000	14555000	633750000	84119000	2337100	0	2447800000	782080000	894530000	62.497	11.25	451.91	261.159	7.128	0	764.098	222.033	276.299
Rv2882c|frr|Ribosome recycling factor Frr (ribosome releasing factor) (RRF)|185 AA	1298500000	2046000000	2660900000	207770000	0	265950000	7820900000	5527800000	5084600000	1033.77	1581.43	1897.41	645.051	0	1013.21	2441.35	1569.35	1570.51
Rv2461c|clpP1|Probable ATP-dependent CLP protease proteolytic subunit 1 ClpP1 (endopeptidase CLP)|200 AA	2522200000	1721500000	1409900000	38189000	0	44276000	2489600000	2504000000	2451800000	2007.99	1330.61	1005.36	118.563	0	168.681	777.146	710.887	757.302
Rv3442c|rpsI|30S ribosomal protein S9 RpsI|151 AA	3934600000	1585000000	1433400000	70443000	74928000	0	4993100000	4066800000	3652300000	3132.43	1225.11	1022.12	218.7	228.52	0	1558.63	1154.57	1128.11
Rv1307|atpH|Probable ATP synthase delta chain AtpH|446 AA	3159600000	2409100000	3038400000	132510000	0	278920000	6114300000	7747800000	7499300000	2515.44	1862.08	2166.6	411.396	0	1062.62	1908.62	2199.61	2316.35
Rv3676|crp|Transcriptional regulatory protein Crp (Crp/Fnr-family)|224 AA	1383300000	2891700000	3107900000	155390000	0	133090000	5591200000	4524600000	5494700000	1101.28	2235.1	2216.16	482.43	0	507.042	1745.33	1284.54	1697.18
Rv0702|rplD|50S ribosomal protein L4 RplD|223 AA	2549600000	3170100000	2107800000	159010000	0	95645000	5103600000	6641700000	5193200000	2029.8	2450.29	1503.01	493.669	0	364.386	1593.12	1885.58	1604.05
Rv0651|rplJ|50S ribosomal protein L10 RplJ|178 AA	573130000	822960000	700130000	582860000	0	26536000	6324100000	5329000000	4114900000	456.283	636.096	499.243	1809.57	0	101.096	1974.11	1512.91	1270.99
Rv2995c|leuB|Probable 3-isopropylmalate dehydrogenase LeuB (beta-IPM dehydrogenase) (IMDH) (3-IPM-DH)|336 AA	461720000	498380000	626630000	0	83347000	16488000	3368700000	3356900000	2983400000	367.587	385.216	446.832	0	254.197	62.816	1051.56	953.026	921.5
Rv2159c|Rv2159c|Conserved protein|344 AA	4477800000	4528600000	11320000000	199980000	0	125170000	6578600000	7752400000	9473200000	3564.89	3500.32	8071.98	620.866	0	476.869	2053.56	2200.91	2926.04
Rv3648c|cspA|Probable cold shock protein A CspA|67 AA	3661100000	5551100000	2710500000	0	411470000	26390000	7880500000	8907800000	7687500000	2914.69	4290.65	1932.78	0	1254.93	100.54	2459.95	2528.93	2374.48
Rv2299c|htpG|Probable chaperone protein HtpG (heat shock protein) (HSP90 family protein) (high temperature protein G)|647 AA	2036200000	1177000000	3475000000	0	18928000	842950000	8002800000	10548000000	9977200000	1621.07	909.747	2477.93	0	57.728	3211.45	2498.13	2994.58	3081.72
Rv1094|desA2|Possible acyl-[acyl-carrier protein] desaturase DesA2 (acyl-[ACP] desaturase) (stearoyl-ACP desaturase)|275 AA	488350000	1054200000	805740000	0	114590000	326460000	21140000000	21588000000	23619000000	388.788	814.83	574.551	0	349.484	1243.74	6599	6128.85	7295.34
Rv1928c|Rv1928c|Probable short-chain type dehydrogenase/reductase|255 AA	42045000	134300000	77948000	0	21371000	0	19901000	16745000	17201000	33.473	103.805	55.583	0	65.179	0	6.212	4.754	5.313
Rv0625c|Rv0625c|Probable conserved transmembrane protein|246 AA	0	0	0	0	0	0	0	16431000	15049000	0	0	0	0	0	0	0	4.665	4.648
Rv1922|Rv1922|Probable conserved lipoprotein|371 AA	0	0	12125000	0	0	0	20075000	0	15581000	0	0	8.646	0	0	0	6.267	0	4.813
Rv1976c|Rv1976c|Conserved hypothetical protein|135 AA	19176000	88651000	18956000	0	40648000	0	27421000	22322000	28635000	15.266	68.522	13.517	0	123.971	0	8.56	6.337	8.845
Rv0596c|vapB4|Possible antitoxin VapB4|85 AA	342750000	0	0	0	0	0	0	25388000	15959000	272.872	0	0	0	0	0	0	7.208	4.929
Rv2127|ansP1|L-asparagine permease AnsP1|489 AA	0	48456000	0	0	32417000	0	34910000	25266000	18098000	0	37.453	0	0	98.867	0	10.897	7.173	5.59
Rv1153c|omt|Probable O-methyltransferase Omt|282 AA	0	26762000	17611000	0	0	0	11887000	0	42146000	0	20.685	12.558	0	0	0	3.711	0	13.018
Rv3228|Rv3228|Conserved hypothetical protein|330 AA	43215000	0	0	0	47451000	0	13709000	62703000	27284000	34.405	0	0	0	144.719	0	4.279	17.801	8.427
Rv0353|hspR|Probable heat shock protein transcriptional repressor HspR (MerR family)|126 AA	0	0	0	0	30111000	0	17678000	29911000	31629000	0	0	0	0	91.834	0	5.518	8.492	9.769
Rv3496c|mce4D|Mce-family protein Mce4D|451 AA	57799000	49783000	30958000	365970000	0	0	197450000	18214000	60728000	46.015	38.479	22.075	1136.2	0	0	61.635	5.171	18.757
Rv1532c|Rv1532c|Conserved hypothetical protein|144 AA	17568000	0	0	0	83964000	0	50856000	66742000	14349000	13.986	0	0	0	256.079	0	15.875	18.948	4.432
Rv0185|Rv0185|Conserved hypothetical protein|169 AA	0	0	19452000	0	0	0	27626000	0	22163000	0	0	13.871	0	0	0	8.624	0	6.846
Rv3919c|gid|Probable glucose-inhibited division protein B Gid|224 AA	0	0	23105000	0	0	0	27730000	0	23155000	0	0	16.476	0	0	0	8.656	0	7.152
Rv1636|TB15.3|Iron-regulated universal stress protein family protein TB15.3|146 AA	2013800000	4308200000	5427800000	106840000	0	20331000	12657000000	15240000000	14023000000	1603.24	3329.97	3870.41	331.7	0	77.456	3950.97	4326.65	4331.36
Rv2463|lipP|Probable esterase/lipase LipP|394 AA	0	0	0	0	287750000	0	39538000	178820000	29003000	0	0	0	0	877.598	0	12.342	50.767	8.958
Rv2237|Rv2237|Conserved protein|255 AA	0	21146000	18277000	21061000	0	0	17253000	25377000	35195000	0	16.345	13.033	65.387	0	0	5.386	7.205	10.871
Rv0405|pks6|Probable membrane bound polyketide synthase Pks6|1402 AA	0	0	27253000	0	144330000	0	25343000	68103000	67190000	0	0	19.433	0	440.187	0	7.911	19.334	20.753
Rv2552c|aroE|Probable shikimate 5-dehydrogenase AroE (5-dehydroshikimate reductase)|269 AA	30428000	0	35163000	0	0	0	24270000	31533000	0	24.224	0	25.074	0	0	0	7.576	8.952	0
Rv0047c|Rv0047c|Conserved protein|180 AA	33725000	33411000	33568000	0	0	0	30785000	0	26548000	26.849	25.825	23.936	0	0	0	9.61	0	8.2
Rv2300c|Rv2300c|Conserved protein|310 AA	0	0	0	0	34770000	0	64702000	38266000	12432000	0	0	0	0	106.044	0	20.197	10.864	3.84
Rv2439c|proB|Probable glutamate 5-kinase protein ProB (gamma-glutamyl kinase) (GK)|376 AA	0	0	33196000	0	0	0	0	26893000	29741000	0	0	23.671	0	0	0	0	7.635	9.186
Rv3510c|Rv3510c|Conserved protein|278 AA	11693000	33790000	0	0	0	0	29056000	0	29205000	9.309	26.118	0	0	0	0	9.07	0	9.021
Rv0779c|Rv0779c|Possible conserved transmembrane protein|206 AA	27631000	0	77068000	0	0	0	49888000	0	17367000	21.998	0	54.955	0	0	0	15.573	0	5.364
Rv3231c|Rv3231c|Conserved protein|169 AA	61265000	0	0	0	0	0	22928000	38452000	0	48.775	0	0	0	0	0	7.157	10.917	0
Rv2619c|Rv2619c|Conserved protein|117 AA	78314000	53066000	102620000	0	0	69299000	26218000	50984000	43257000	62.348	41.017	73.175	0	0	264.013	8.184	14.474	13.361
Rv2484c|Rv2484c|Possible triacylglycerol synthase (diacylglycerol acyltransferase)|491 AA	56171000	58517000	103850000	0	0	0	55539000	16636000	0	44.719	45.23	74.053	0	0	0	17.337	4.723	0
Rv2397c|cysA1|Sulfate-transport ATP-binding protein ABC transporter CysA1|351 AA	0	0	27104000	0	0	0	15894000	58665000	0	0	0	19.327	0	0	0	4.961	16.655	0
Rv2125|Rv2125|Conserved hypothetical protein|292 AA	0	0	0	57323000	0	0	37551000	26888000	54661000	0	0	0	177.967	0	0	11.722	7.634	16.883
Rv3661|Rv3661|Conserved hypothetical protein|287 AA	0	93216000	0	0	0	82720000	27645000	30937000	88443000	0	72.05	0	0	0	315.144	8.63	8.783	27.318
Rv2954c|Rv2954c|Hypothetical protein|241 AA	0	14113000	0	0	0	0	29305000	0	35535000	0	10.908	0	0	0	0	9.148	0	10.976
Rv1841c|Rv1841c|Conserved hypothetical membrane protein|345 AA	24105000	80750000	53757000	0	0	0	0	15449000	65477000	19.191	62.415	38.333	0	0	0	0	4.386	20.224
Rv0313|Rv0313|Conserved protein|128 AA	93486000	63275000	216500000	0	0	0	0	31425000	34477000	74.427	48.908	154.38	0	0	0	0	8.922	10.649
Rv2170|Rv2170|GCN5-related N-acetyltransferase|206 AA	0	33089000	44626000	0	0	0	54125000	20866000	0	0	25.576	31.822	0	0	0	16.895	5.924	0
Rv2080|lppJ|Lipoprotein LppJ|187 AA	49391000	53806000	0	0	0	0	53410000	0	23199000	39.321	41.589	0	0	0	0	16.672	0	7.166
Rv0417|thiG|Probable thiamin biosynthesis protein ThiG (thiazole biosynthesis protein)|252 AA	60522000	26470000	0	0	23708000	0	16425000	37629000	50216000	48.183	20.46	0	0	72.306	0	5.127	10.683	15.511
Rv1576c|Rv1576c|Probable PhiRv1 phage protein|473 AA	0	0	20878000	0	0	0	43851000	0	29375000	0	0	14.888	0	0	0	13.688	0	9.073
Rv0812|Rv0812|Probable amino acid aminotransferase|289 AA	37878000	73478000	0	17230000	0	0	76747000	17876000	16784000	30.156	56.794	0	53.493	0	0	23.957	5.075	5.184
Rv2708c|Rv2708c|Conserved hypothetical protein|82 AA	51181000	0	0	0	0	0	0	27513000	48273000	40.746	0	0	0	0	0	0	7.811	14.91
Rv3836|Rv3836|Conserved hypothetical protein|137 AA	0	84359000	45128000	0	0	0	46558000	31356000	0	0	65.204	32.18	0	0	0	14.533	8.902	0
Rv1850|ureC|Urease alpha subunit UreC (urea amidohydrolase)|577 AA	989550000	0	63761000	0	0	0	0	48351000	30724000	787.806	0	45.466	0	0	0	0	13.727	9.49
Rv0487|Rv0487|Conserved hypothetical protein|183 AA	35143000	0	31052000	54205000	0	0	36284000	28758000	82717000	27.978	0	22.142	168.287	0	0	11.326	8.164	25.549
Rv3807c|Rv3807c|Possible conserved transmembrane protein|165 AA	15600000	0	18272000	0	0	0	0	50641000	31792000	12.42	0	13.029	0	0	0	0	14.377	9.82
Rv3895c|eccB2|ESX conserved component EccB2. ESX-2 type VII secretion system protein. Probable membrane protein.|495 AA	20521000	28432000	0	0	113300000	0	94553000	24644000	98527000	16.337	21.976	0	0	345.549	0	29.515	6.996	30.433
Rv2670c|Rv2670c|Conserved hypothetical protein|369 AA	76081000	0	0	0	53107000	0	28122000	76126000	44454000	60.57	0	0	0	161.969	0	8.778	21.612	13.731
Rv0630c|recB|Probable exonuclease V (beta chain) RecB (exodeoxyribonuclease V beta chain)(exodeoxyribonuclease V polypeptide) (chi-specific endonuclease)|1094 AA	0	0	113300000	0	18101000	0	24402000	32971000	42241000	0	0	80.791	0	55.206	0	7.617	9.36	13.047
Rv3366|spoU|Probable tRNA/rRNA methylase SpoU (tRNA/rRNA methyltransferase)|154 AA	0	34141000	0	0	0	0	48331000	36370000	0	0	26.389	0	0	0	0	15.087	10.325	0
Rv0676c|mmpL5|Probable conserved transmembrane transport protein MmpL5|964 AA	0	0	29554000	0	29613000	0	48143000	35096000	35677000	0	0	21.074	0	90.316	0	15.028	9.964	11.02
Rv0117|oxyS|Oxidative stress response regulatory protein OxyS|314 AA	56936000	24322000	77146000	0	0	0	0	68275000	26593000	45.328	18.799	55.011	0	0	0	0	19.383	8.214
Rv2063|mazE7|Antitoxin MazE7|77 AA	0	0	268740000	0	0	0	0	101390000	17995000	0	0	191.631	0	0	0	0	28.785	5.558
Rv2381c|mbtD|Polyketide synthetase MbtD (polyketide synthase)|1004 AA	0	0	123840000	0	0	0	76144000	0	25107000	0	0	88.307	0	0	0	23.769	0	7.755
Rv0051|Rv0051|Probable conserved transmembrane protein|560 AA	39032000	0	0	0	0	0	29870000	0	64255000	31.074	0	0	0	0	0	9.324	0	19.847
Rv3181c|Rv3181c|Conserved protein|150 AA	0	0	25771000	0	0	0	50964000	37639000	0	0	0	18.377	0	0	0	15.909	10.686	0
Rv3673c|Rv3673c|Possible membrane-anchored thioredoxin-like protein (thiol-disulfide interchange related protein)|227 AA	0	67476000	48127000	0	0	0	0	25628000	75022000	0	52.155	34.318	0	0	0	0	7.276	23.172
Rv2717c|Rv2717c|Conserved protein|164 AA	55754000	0	0	97555000	0	0	34954000	82262000	62922000	44.387	0	0	302.873	0	0	10.911	23.354	19.435
Rv2473|Rv2473|Possible alanine and proline rich membrane protein|238 AA	28141000	104900000	0	0	0	0	0	37830000	52683000	22.404	81.081	0	0	0	0	0	10.74	16.273
Rv0169|mce1A|Mce-family protein Mce1A|454 AA	28238000	46092000	0	0	103110000	0	102970000	26621000	93961000	22.481	35.626	0	0	314.471	0	32.143	7.558	29.022
Rv2585c|Rv2585c|Possible conserved lipoprotein|557 AA	168620000	0	214600000	0	49623000	0	41790000	41596000	65958000	134.243	0	153.025	0	151.343	0	13.045	11.809	20.373
Rv0768|aldA|Probable aldehyde dehydrogenase NAD dependent AldA (aldehyde dehydrogenase [NAD+])|489 AA	17648000	38921000	155090000	0	22166000	0	76211000	26366000	27177000	14.05	30.083	110.59	0	67.603	0	23.79	7.485	8.394
Rv1579c|Rv1579c|Probable PhiRv1 phage protein|104 AA	18539000	51002000	0	0	0	0	0	55797000	38231000	14.759	39.421	0	0	0	0	0	15.841	11.809
Rv2018|Rv2018|Conserved protein|239 AA	40067000	63498000	0	0	0	33543000	18530000	44040000	82623000	31.898	49.08	0	0	0	127.791	5.784	12.503	25.52
Rv2186c|Rv2186c|Conserved hypothetical protein|129 AA	0	34928000	0	0	0	0	0	47939000	45702000	0	26.997	0	0	0	0	0	13.61	14.116
Rv0287|esxG|ESAT-6 like protein EsxG (conserved protein TB9.8)|97 AA	232170000	234900000	34664000	0	0	0	21703000	108170000	0	184.836	181.563	24.718	0	0	0	6.775	30.71	0
Rv2366c|Rv2366c|Probable conserved transmembrane protein|435 AA	0	0	0	0	257560000	0	97986000	86468000	81271000	0	0	0	0	785.523	0	30.587	24.548	25.103
Rv2008c|Rv2008c|Conserved hypothetical protein|441 AA	17972000	16790000	13968000	0	0	16153000	16964000	53497000	39268000	14.308	12.978	9.96	0	0	61.539	5.295	15.188	12.129
Rv3694c|Rv3694c|Possible conserved transmembrane protein|330 AA	0	0	29428000	0	0	40126000	66115000	27495000	57618000	0	0	20.984	0	0	152.871	20.638	7.806	17.797
Rv0034|Rv0034|Conserved hypothetical protein|131 AA	0	84252000	59303000	0	0	0	44972000	0	59570000	0	65.121	42.287	0	0	0	14.038	0	18.4
Rv2963|Rv2963|Probable integral membrane protein|406 AA	0	237220000	122520000	0	0	0	45702000	58177000	0	0	183.356	87.366	0	0	0	14.266	16.516	0
Rv3243c|Rv3243c|Unknown protein|280 AA	0	0	0	0	70908000	0	61840000	51722000	69617000	0	0	0	0	216.26	0	19.304	14.684	21.503
Rv2849c|cobO|Probable cob(I)alamin adenosyltransferase CobO (corrinoid adenosyltransferase) (corrinoid adotransferase activity)|207 AA	0	0	0	0	12272000	0	100980000	22721000	18530000	0	0	0	0	37.428	0	31.522	6.451	5.723
Rv0337c|aspC|Probable aspartate aminotransferase AspC (transaminase A) (ASPAT)|429 AA	896910000	21812000	29201000	0	210470000	0	117730000	130200000	44309000	714.053	16.859	20.822	0	641.905	0	36.75	36.964	13.686
Rv2824c|Rv2824c|Hypothetical protein|314 AA	103250000	48039000	102680000	0	0	0	41996000	0	74998000	82.2	37.131	73.218	0	0	0	13.109	0	23.165
Rv1749c|Rv1749c|Possible integral membrane protein|185 AA	0	0	0	93191000	0	0	71719000	67968000	58254000	0	0	0	289.324	0	0	22.388	19.296	17.993
Rv3220c|Rv3220c|Probable two component sensor kinase|501 AA	336750000	0	91773000	0	41104000	0	126020000	24709000	50246000	268.095	0	65.441	0	125.362	0	39.338	7.015	15.52
Rv0093c|Rv0093c|Probable conserved membrane protein|282 AA	0	0	32700000	0	70482000	0	48398000	74597000	66761000	0	0	23.317	0	214.96	0	15.108	21.178	20.621
Rv0817c|Rv0817c|Probable conserved exported protein|270 AA	45768000	71635000	77569000	0	94438000	0	32717000	77384000	127090000	36.437	55.369	55.312	0	288.023	0	10.213	21.969	39.255
Rv2571c|Rv2571c|Probable transmembrane alanine and valine and leucine rich protein|355 AA	72905000	58762000	34784000	0	0	0	0	84268000	37368000	58.042	45.419	24.804	0	0	0	0	23.924	11.542
Rv0455c|Rv0455c|Conserved protein|148 AA	0	0	193780000	0	0	0	0	81788000	41511000	0	0	138.179	0	0	0	0	23.22	12.822
Rv0907|Rv0907|Conserved protein|532 AA	0	0	0	0	36118000	0	58908000	99243000	22709000	0	0	0	0	110.155	0	18.389	28.175	7.014
Rv1131|prpC|Probable methylcitrate synthase PrpC|393 AA	0	0	0	0	0	15937000	26242000	39053000	51774000	0	0	0	0	0	60.716	8.192	11.087	15.992
Rv0681|Rv0681|Probable transcriptional regulatory protein (possibly TetR-family)|196 AA	110980000	0	71883000	0	21384000	0	59557000	62564000	22113000	88.354	0	51.258	0	65.218	0	18.591	17.762	6.83
Rv1204c|Rv1204c|Conserved hypothetical protein|562 AA	39953000	0	0	0	28555000	0	105050000	28436000	41334000	31.808	0	0	0	87.089	0	32.792	8.073	12.767
Rv2939|papA5|Possible conserved polyketide synthase associated protein PapA5|422 AA	0	0	28519000	0	0	0	129320000	28404000	0	0	0	20.336	0	0	0	40.368	8.064	0
Rv2956|Rv2956|Conserved protein|243 AA	0	26735000	83578000	0	0	0	0	36156000	101160000	0	20.664	59.597	0	0	0	0	10.265	31.246
Rv0328|Rv0328|Possible transcriptional regulatory protein (possibly TetR/AcrR-family)|200 AA	33148000	0	0	0	0	0	47781000	0	81544000	26.39	0	0	0	0	0	14.915	0	25.187
Rv1259|udgB|Probable uracil DNA glycosylase	39973000	0	0	0	0	0	0	72815000	51228000	31.824	0	0	0	0	0	0	20.672	15.823
Rv2325c|Rv2325c|Conserved hypothetical protein|282 AA	0	0	0	0	0	0	174410000	21799000	0	0	0	0	0	0	0	54.443	6.189	0
Rv0502|Rv0502|Conserved protein|358 AA	0	0	162650000	0	0	0	39573000	0	100850000	0	0	115.981	0	0	0	12.353	0	31.15
Rv1534|Rv1534|Probable transcriptional regulator|225 AA	0	15415000	50851000	0	0	0	25418000	160280000	0	0	11.915	36.26	0	0	0	7.934	45.504	0
Rv3806c|ubiA|Decaprenylphosphoryl-5-phosphoribose (DPPR) synthase (decaprenyl-phosphate 5-phosphoribosyltransferase)|302 AA	86827000	71897000	231170000	0	102050000	0	126790000	38349000	104800000	69.125	55.572	164.841	0	311.238	0	39.578	10.887	32.37
Rv2781c|Rv2781c|Possible alanine rich oxidoreductase|344 AA	252140000	43749000	34954000	0	0	0	0	59975000	67811000	200.735	33.815	24.925	0	0	0	0	17.027	20.945
Rv3329|Rv3329|Probable aminotransferase|438 AA	26597000	0	118490000	0	0	0	0	70380000	59455000	21.175	0	84.492	0	0	0	0	19.981	18.364
Rv3142c|Rv3142c|Hypothetical protein|142 AA	0	115710000	0	0	0	0	0	61980000	68832000	0	89.437	0	0	0	0	0	17.596	21.261
Rv3548c|Rv3548c|Probable short-chain type dehydrogenase/reductase|304 AA	0	0	15949000	0	80177000	0	42208000	103470000	84304000	0	0	11.373	0	244.529	0	13.176	29.375	26.039
Rv3059|cyp136|Probable cytochrome P450 136 Cyp136|492 AA	26612000	39775000	23151000	25697000	0	0	12516000	71839000	113830000	21.186	30.744	16.508	79.78	0	0	3.907	20.395	35.159
Rv2526|vapB17|Possible antitoxin VapB17|75 AA	70174000	60283000	91889000	0	0	0	30905000	145350000	0	55.867	46.595	65.523	0	0	0	9.647	41.265	0
Rv2225|panB|3-methyl-2-oxobutanoate hydroxymethyltransferase PanB|281 AA	0	0	0	0	11698000	0	37267000	62996000	24290000	0	0	0	0	35.677	0	11.633	17.885	7.503
Rv1252c|lprE|Probable lipoprotein LprE|202 AA	13731000	0	0	0	0	0	0	174740000	25832000	10.932	0	0	0	0	0	0	49.609	7.979
Rv1210|tagA|Probable DNA-3-methyladenine glycosylase I TagA (tag I) (3-methyladenine-DNA glycosylase I	0	0	96466000	0	18395000	0	52497000	44200000	40777000	0	0	68.787	0	56.102	0	16.387	12.548	12.595
Rv0786c|Rv0786c|Conserved protein|129 AA	0	114930000	112150000	0	0	0	0	99081000	46413000	0	88.834	79.971	0	0	0	0	28.129	14.336
Rv1942c|mazF5|Possible toxin MazF5|109 AA	0	0	0	0	52950000	0	101780000	26594000	112110000	0	0	0	0	161.49	0	31.771	7.55	34.628
Rv1762c|Rv1762c|Unknown protein|262 AA	216620000	224030000	99129000	0	40517000	0	104930000	89955000	22995000	172.457	173.161	70.686	0	123.571	0	32.755	25.538	7.103
Rv2335|cysE|Probable serine acetyltransferase CysE (sat)|229 AA	0	0	24929000	0	38509000	0	25847000	110730000	74986000	0	0	17.776	0	117.447	0	8.068	31.436	23.161
Rv3505|fadE27|Probable acyl-CoA dehydrogenase FadE27|373 AA	0	0	0	24854000	0	0	26391000	160680000	28643000	0	0	0	77.163	0	0	8.238	45.617	8.847
Rv0550c|vapB3|Possible antitoxin VapB3|88 AA	29706000	0	0	0	0	0	50842000	110060000	0	23.65	0	0	0	0	0	15.871	31.246	0
Rv3357|relJ|Antitoxin RelJ|91 AA	41599000	35909000	45149000	0	0	0	72459000	0	83540000	33.118	27.755	32.194	0	0	0	22.619	0	25.803
Rv1346|mbtN|Acyl-CoA dehydrogenase MbtN|386 AA	0	0	0	9742500	0	0	49927000	24336000	51162000	0	0	0	30.247	0	0	15.585	6.909	15.803
Rv1456c|Rv1456c|Probable unidentified antibiotic-transport integral membrane ABC transporter|310 AA	83329000	68678000	0	0	0	0	71831000	85852000	0	66.34	53.084	0	0	0	0	22.423	24.373	0
Rv1730c|Rv1730c|Possible penicillin-binding protein|517 AA	0	0	0	26626000	0	0	20344000	98287000	76028000	0	0	0	82.664	0	0	6.351	27.904	23.483
Rv1249c|Rv1249c|Possible membrane protein|262 AA	13370000	0	0	0	0	0	0	86952000	71389000	10.644	0	0	0	0	0	0	24.686	22.05
Rv3188|Rv3188|Conserved hypothetical protein|115 AA	0	0	20046000	0	0	0	119680000	0	55654000	0	0	14.294	0	0	0	37.359	0	17.19
Rv1660|pks10|Chalcone synthase Pks10|353 AA	26050000	28482000	23056000	0	31419000	0	43256000	56076000	93958000	20.739	22.015	16.441	0	95.824	0	13.503	15.92	29.021
Rv1761c|Rv1761c|Possible exported protein|127 AA	0	0	0	0	39743000	0	25006000	70992000	159110000	0	0	0	0	121.211	0	7.806	20.155	49.145
Rv0364|Rv0364|Possible conserved transmembrane protein|227 AA	12288000	0	0	0	25722000	0	76190000	26358000	102570000	9.783	0	0	0	78.449	0	23.783	7.483	31.681
Rv3497c|mce4C|Mce-family protein Mce4C|357 AA	27398000	26060000	80976000	0	0	23928000	28902000	94258000	52870000	21.812	20.143	57.742	0	0	91.16	9.022	26.76	16.33
Rv1329c|dinG|Probable ATP-dependent helicase DinG|664 AA	0	0	0	0	12035000	0	49706000	25636000	76897000	0	0	0	0	36.705	0	15.516	7.278	23.752
Rv3498c|mce4B|Mce-family protein Mce4B|350 AA	0	67628000	23157000	0	27548000	0	73750000	46677000	65368000	0	52.272	16.513	0	84.018	0	23.022	13.252	20.191
Rv2375|Rv2375|Conserved hypothetical protein|105 AA	96570000	135110000	69431000	0	0	9234300	35018000	44298000	43554000	76.882	104.432	49.509	0	0	35.181	10.931	12.576	13.453
Rv2847c|cysG|Possible multifunctional enzyme siroheme synthase CysG: uroporphyrin-III C-methyltransferase (urogen III methylase) (SUMT) (uroporphyrinogen III methylase) (UROM) + precorrin-2 oxidase + ferrochelatase|405 AA	0	49268000	72675000	0	0	0	135040000	0	61646000	0	38.081	51.823	0	0	0	42.154	0	19.041
Rv1848|ureA|Urease gamma subunit UreA (urea amidohydrolase)|100 AA	0	12537000	0	38027000	0	0	24272000	106760000	109520000	0	9.69	0	118.06	0	0	7.577	30.309	33.828
Rv2516c|Rv2516c|Hypothetical protein|267 AA	0	0	42188000	0	18311000	0	45196000	108280000	32263000	0	0	30.083	0	55.846	0	14.108	30.741	9.965
Rv0598c|vapC27|Possible toxin VapC27. Contains PIN domain.|137 AA	0	0	34911000	0	0	0	0	107320000	77360000	0	0	24.894	0	0	0	0	30.468	23.895
Rv3058c|Rv3058c|Possible transcriptional regulatory protein (probably TetR-family)|216 AA	291850000	105530000	138910000	0	0	0	82849000	103540000	0	232.349	81.568	99.053	0	0	0	25.862	29.395	0
Rv2728c|Rv2728c|Conserved alanine rich protein|231 AA	110570000	0	0	12524000	0	0	48222000	84296000	25661000	88.028	0	0	38.883	0	0	15.053	23.932	7.926
Rv1920|Rv1920|Probable membrane protein|287 AA	158950000	38992000	180540000	0	44398000	0	101340000	60457000	73418000	126.544	30.138	128.738	0	135.408	0	31.634	17.164	22.677
Rv2440c|obg|Probable GTP1/Obg-family GTP-binding protein Obg|479 AA	0	16567000	25411000	0	0	0	115640000	77092000	0	0	12.805	18.12	0	0	0	36.098	21.886	0
Rv0236A|Rv0236A|Small secreted protein|57 AA	0	0	36256000	0	0	0	142090000	67033000	0	0	0	25.853	0	0	0	44.354	19.031	0
Rv0968|Rv0968|Conserved protein|98 AA	345070000	239260000	183960000	0	0	134910000	59307000	108830000	190490000	274.719	184.933	131.177	0	0	513.976	18.513	30.897	58.838
Rv3314c|deoA|Probable thymidine phosphorylase DeoA (tdrpase) (pyrimidine phosphorylase)|427 AA	38949000	0	99690000	23171000	0	0	74141000	84516000	35895000	31.008	0	71.086	71.938	0	0	23.144	23.994	11.087
Rv1132|Rv1132|Conserved membrane protein|576 AA	110740000	111080000	115530000	0	56716000	0	122880000	101880000	50648000	88.163	85.858	82.381	0	172.976	0	38.358	28.924	15.644
Rv2073c|Rv2073c|Probable shortchain dehydrogenase|249 AA	36400000	0	0	0	72075000	0	140730000	88651000	67386000	28.979	0	0	0	219.819	0	43.93	25.168	20.814
Rv0808|purF|Amidophosphoribosyltransferase PurF (glutamine phosphoribosylpyrophosphate amidotransferase) (ATASE) (gpatase)|527 AA	0	92305000	76099000	0	103360000	0	121410000	96244000	104850000	0	71.346	54.264	0	315.234	0	37.899	27.324	32.386
Rv2425c|Rv2425c|Conserved hypothetical protein|480 AA	0	0	17298000	0	0	0	431380000	0	26133000	0	0	12.335	0	0	0	134.658	0	8.072
Rv1493|mutB|Probable methylmalonyl-CoA mutase large subunit MutB (MCM)|750 AA	29613000	0	0	0	0	0	55305000	198660000	0	23.576	0	0	0	0	0	17.264	56.4	0
Rv1912c|fadB5|Possible oxidoreductase FadB5|334 AA	98610000	143160000	259150000	0	53978000	0	62980000	109080000	95062000	78.506	110.654	184.793	0	164.625	0	19.66	30.968	29.362
Rv1977|Rv1977|Conserved protein|348 AA	57499000	72274000	53321000	0	140440000	0	155330000	94272000	128490000	45.776	55.863	38.022	0	428.323	0	48.487	26.764	39.687
Rv0130|htdZ|Probable 3-hydroxyl-thioester dehydratase|151 AA	82097000	0	0	0	0	0	145760000	79119000	0	65.359	0	0	0	0	0	45.5	22.462	0
Rv0035|fadD34|Probable fatty-acid-CoA ligase FadD34 (fatty-acid-CoA synthetase) (fatty-acid-CoA synthase)|562 AA	18526000	13596000	31266000	0	0	18410000	76460000	60402000	44299000	14.749	10.509	22.295	0	0	70.138	23.868	17.148	13.683
Rv1742|Rv1742|Unknown protein|245 AA	0	48580000	30632000	0	58049000	0	95405000	58899000	150770000	0	37.549	21.843	0	177.041	0	29.781	16.721	46.569
Rv3872|PE35|PE family-related protein PE35|99 AA	0	0	0	0	0	0	0	76328000	166250000	0	0	0	0	0	0	0	21.67	51.351
Rv0499|Rv0499|Conserved hypothetical protein|291 AA	0	15355000	0	0	40712000	0	81636000	109540000	64373000	0	11.868	0	0	124.166	0	25.483	31.098	19.883
Rv0857|Rv0857|Conserved hypothetical protein|157 AA	52522000	0	17991000	0	0	0	109880000	119460000	0	41.814	0	12.829	0	0	0	34.3	33.915	0
Rv2795c|Rv2795c|Conserved hypothetical protein|324 AA	91212000	142070000	116710000	0	91640000	0	80388000	138210000	118790000	72.616	109.811	83.223	0	279.489	0	25.094	39.238	36.691
Rv0059|Rv0059|Hypothetical protein|230 AA	507880000	42819000	89036000	86063000	0	0	121510000	93701000	102100000	404.336	33.096	63.489	267.195	0	0	37.93	26.602	31.536
Rv1019|Rv1019|Probable transcriptional regulatory protein (probably TetR-family)|197 AA	19498000	15399000	105740000	0	45928000	0	54137000	100220000	124460000	15.523	11.902	75.4	0	140.074	0	16.899	28.453	38.443
Rv1531|Rv1531|Conserved protein|188 AA	0	137750000	61854000	91383000	0	0	45175000	177600000	142710000	0	106.472	44.106	283.711	0	0	14.102	50.421	44.08
Rv3855|ethR|Transcriptional regulatory repressor protein (TetR-family) EthR|216 AA	0	0	0	20345000	0	0	41822000	61111000	114480000	0	0	0	63.164	0	0	13.055	17.349	35.36
Rv3309c|upp|Probable uracil phosphoribosyltransferase Upp (UMP pyrophosphorylase) (uprtase) (UMP diphosphorylase)|207 AA	0	149590000	0	0	0	0	0	225860000	64693000	0	115.624	0	0	0	0	0	64.122	19.982
Rv1865c|Rv1865c|Probable short-chain type dehydrogenase|286 AA	145450000	192560000	347980000	0	51091000	0	124730000	74337000	96362000	115.796	148.837	248.135	0	155.821	0	38.935	21.104	29.764
Rv3412|Rv3412|Conserved hypothetical protein|136 AA	0	55394000	26857000	64572000	0	0	111280000	99806000	91312000	0	42.816	19.151	200.473	0	0	34.737	28.335	28.204
Rv1620c|cydC|Probable component linked with the assembly of cytochrome transport transmembrane ATP-binding protein ABC transporter CydC|576 AA	20640000	27292000	0	0	0	27538000	156040000	56138000	50300000	16.432	21.095	0	0	0	104.913	48.709	15.938	15.536
Rv0825c|Rv0825c|Conserved protein|213 AA	145560000	38961000	14400000	0	0	146130000	126570000	141260000	122830000	115.884	30.114	10.268	0	0	556.722	39.51	40.104	37.939
Rv2739c|Rv2739c|Possible alanine rich transferase|388 AA	54017000	79976000	78968000	0	18890000	0	63790000	80752000	66364000	43.004	61.816	56.31	0	57.612	0	19.912	22.926	20.498
Rv3908|mutT4|Possible mutator protein MutT4|248 AA	54152000	0	43301000	0	28695000	0	124880000	187340000	21759000	43.112	0	30.877	0	87.516	0	38.982	53.186	6.721
Rv2019|Rv2019|Conserved protein|138 AA	10144000	0	8739100	31818000	0	0	61207000	193410000	43452000	8.076	0	6.232	98.783	0	0	19.106	54.909	13.421
Rv1590|Rv1590|Conserved hypothetical protein|79 AA	90234000	0	36599000	63460000	0	0	50568000	32796000	732980000	71.838	0	26.098	197.02	0	0	15.785	9.311	226.4
Rv3579c|Rv3579c|Possible tRNA/rRNA methyltransferase|322 AA	158360000	157760000	30329000	97904000	0	0	222890000	55844000	162680000	126.074	121.939	21.627	303.957	0	0	69.577	15.854	50.248
Rv1473|Rv1473|Probable macrolide-transport ATP-binding protein ABC transporter|542 AA	0	59162000	51789000	0	52062000	0	48706000	166890000	126150000	0	45.728	36.929	0	158.782	0	15.204	47.38	38.965
Rv3384c|vapC46|Possible toxin VapC46. Contains PIN domain.|130 AA	11771000	25600000	10243000	0	31731000	0	62946000	82309000	129510000	9.371	19.787	7.304	0	96.775	0	19.649	23.368	40.003
Rv3603c|Rv3603c|Conserved hypothetical alanine and leucine rich protein|303 AA	0	23637000	35518000	0	51074000	0	56424000	177970000	104330000	0	18.27	25.327	0	155.769	0	17.613	50.526	32.225
Rv0419|lpqM|Possible lipoprotein peptidase LpqM|498 AA	0	40482000	166970000	0	36250000	0	128290000	73517000	91268000	0	31.29	119.062	0	110.558	0	40.047	20.872	28.19
Rv1061|Rv1061|Conserved protein|287 AA	169490000	53836000	27579000	0	73884000	0	131610000	193150000	66439000	134.935	41.612	19.666	0	225.336	0	41.083	54.835	20.521
Rv2709|Rv2709|Probable conserved transmembrane protein|148 AA	0	0	59940000	0	134840000	0	144040000	158170000	144530000	0	0	42.742	0	411.243	0	44.963	44.905	44.642
Rv0413|mutT3|Possible mutator protein MutT3 (7	102680000	102430000	0	0	0	0	177510000	124360000	0	81.746	79.172	0	0	0	0	55.411	35.306	0
Rv0785|Rv0785|Conserved protein|566 AA	29820000	0	71561000	0	106940000	0	234090000	151310000	76250000	23.74	0	51.028	0	326.152	0	73.073	42.957	23.552
Rv1410c|Rv1410c|Aminoglycosides/tetracycline-transport integral membrane protein|518 AA	291820000	627780000	187610000	0	68411000	0	108890000	97441000	164450000	232.325	485.234	133.779	0	208.644	0	33.991	27.664	50.795
Rv0016c|pbpA|Probable penicillin-binding protein PbpA|491 AA	105880000	145930000	36171000	0	145390000	0	82853000	256430000	160110000	84.294	112.795	25.793	0	443.419	0	25.863	72.801	49.454
Rv0865|mog|Probable molybdopterin biosynthesis Mog protein|160 AA	165690000	0	211860000	0	0	72691000	201210000	94327000	88067000	131.91	0	151.071	0	0	276.936	62.809	26.779	27.202
Rv1010|ksgA|Probable dimethyladenosine transferase KsgA (S-adenosylmethionine-6-N	130750000	64561000	142860000	0	27653000	0	84524000	111930000	74421000	104.093	49.902	101.869	0	84.338	0	26.385	31.777	22.987
Rv1564c|treX|Probable maltooligosyltrehalose synthase TreX|721 AA	81413000	70980000	114330000	0	49459000	0	159180000	107170000	79032000	64.815	54.863	81.526	0	150.843	0	49.689	30.426	24.411
Rv1991A|mazE6|Antitoxin MazE6|82 AA	0	0	0	0	26320000	0	79742000	132450000	64555000	0	0	0	0	80.272	0	24.892	37.603	19.939
Rv2351c|plcA|Membrane-associated phospholipase C 1 PlcA (MTP40 antigen)|512 AA	33617000	26828000	0	0	0	0	0	97671000	244380000	26.763	20.736	0	0	0	0	0	27.729	75.483
Rv1285|cysD|Probable sulfate adenylyltransferase subunit 2 CysD|332 AA	39094000	115910000	96414000	0	108830000	0	95503000	221560000	132810000	31.124	89.591	68.75	0	331.917	0	29.812	62.901	41.022
Rv1847|Rv1847|Conserved protein|140 AA	131600000	36967000	240490000	0	0	44613000	46491000	151520000	141590000	104.77	28.573	171.487	0	0	169.965	14.512	43.017	43.734
Rv1224|tatB|Probable protein TatB|131 AA	39682000	0	52284000	36610000	0	0	333970000	42145000	75167000	31.592	0	37.282	113.661	0	0	104.251	11.965	23.217
Rv3701c|Rv3701c|Conserved hypothetical protein|321 AA	15981000	20549000	57392000	0	61399000	0	110970000	174080000	91077000	12.723	15.883	40.925	0	187.258	0	34.64	49.421	28.131
Rv0348|Rv0348|Possible transcriptional regulatory protein|217 AA	0	0	15447000	0	36847000	0	60179000	142130000	121440000	0	0	11.015	0	112.378	0	18.785	40.351	37.51
Rv2903c|lepB|Probable signal peptidase I LepB (SPASE I) (leader peptidase I).|294 AA	0	0	117090000	0	30014000	0	109080000	59075000	154950000	0	0	83.494	0	91.539	0	34.05	16.771	47.86
Rv3173c|Rv3173c|Probable transcriptional regulatory protein (probably TetR/AcrR-family)|200 AA	0	96137000	0	0	0	15098000	97643000	94486000	44675000	0	74.308	0	0	0	57.52	30.48	26.825	13.799
Rv2482c|plsB2|Probable glycerol-3-phosphate acyltransferase PlsB2 (GPAT)|789 AA	35453000	63543000	0	0	21890000	0	81517000	62656000	146010000	28.225	49.115	0	0	66.761	0	25.446	17.788	45.099
Rv3341|metA|Probable homoserine O-acetyltransferase MetA (homoserine O-trans-acetylase) (homoserine transacetylase) (HTA)|379 AA	0	0	0	0	21794000	0	80823000	103470000	92694000	0	0	0	0	66.469	0	25.229	29.375	28.631
Rv1342c|Rv1342c|Conserved membrane protein|120 AA	51611000	0	116990000	0	0	53279000	58445000	144640000	189310000	41.089	0	83.422	0	0	202.981	18.244	41.063	58.473
Rv0149|Rv0149|Possible quinone oxidoreductase (NADPH:quinone oxidoreductase) (zeta-crystallin)|322 AA	19403000	62467000	145810000	0	91376000	0	148960000	125660000	191200000	15.447	48.283	103.973	0	278.684	0	46.499	35.675	59.057
Rv0910|Rv0910|Conserved hypothetical protein|144 AA	46603000	0	18724000	0	52546000	0	84313000	302460000	71633000	37.102	0	13.352	0	160.258	0	26.319	85.869	22.126
Rv0693|pqqE|Probable coenzyme PQQ synthesis protein E PqqE (coenzyme PQQ synthesis protein III)|391 AA	0	0	27865000	0	31822000	0	54311000	85499000	265400000	0	0	19.87	0	97.053	0	16.954	24.273	81.976
Rv0713|Rv0713|Probable conserved transmembrane protein|313 AA	61490000	68585000	111370000	0	0	62928000	135110000	112070000	144590000	48.954	53.012	79.415	0	0	239.741	42.176	31.817	44.66
Rv1008|tatD|Probable deoxyribonuclease TatD (YJJV protein)|264 AA	0	98208000	0	0	14297000	0	27129000	134870000	143500000	0	75.909	0	0	43.604	0	8.469	38.29	44.324
Rv1580c|Rv1580c|Probable PhiRv1 phage protein|90 AA	28096000	0	68026000	0	0	0	231400000	159220000	0	22.368	0	48.507	0	0	0	72.233	45.203	0
Rv2066|cobI|Probable bifunctional protein	54871000	59518000	63474000	27010000	0	0	211730000	85896000	57996000	43.684	46.004	45.262	83.856	0	0	66.093	24.386	17.914
Rv1213|glgC|Glucose-1-phosphate adenylyltransferase GlgC (ADP-glucose synthase) (ADP-glucose pyrophosphorylase)|404 AA	254630000	198230000	81608000	0	63782000	0	131960000	122430000	167520000	202.717	153.219	58.192	0	194.526	0	41.192	34.758	51.743
Rv1117|Rv1117|Conserved protein|107 AA	316420000	116700000	58668000	227240000	0	0	189800000	235300000	188500000	251.91	90.202	41.835	705.498	0	0	59.247	66.802	58.223
Rv0530A|Rv0530A|Conserved protein|53 AA	0	64230000	75921000	0	0	0	0	198910000	192720000	0	49.646	54.137	0	0	0	0	56.471	59.527
Rv2900c|fdhF|Possible formate dehydrogenase H FdhF (formate-hydrogen-lyase-linked	216140000	0	533000000	0	0	0	219800000	186440000	0	172.074	0	380.067	0	0	0	68.612	52.93	0
Rv2985|mutT1|Possible hydrolase MutT1|317 AA	35235000	15177000	33748000	0	27551000	0	257100000	161350000	30494000	28.051	11.731	24.065	0	84.027	0	80.256	45.807	9.419
Rv1247c|relB|Antitoxin RelB|89 AA	83873000	100690000	21914000	0	0	0	226830000	186190000	0	66.773	77.827	15.626	0	0	0	70.807	52.859	0
Rv1828|Rv1828|Conserved protein|247 AA	0	17471000	17987000	0	0	9043000	70212000	76843000	69137000	0	13.504	12.826	0	0	34.452	21.917	21.816	21.355
Rv0414c|thiE|Thiamine-phosphate pyrophosphorylase ThiE (TMP pyrophosphorylase) (TMP-PPASE) (thiamine-phosphate synthase)|222 AA	87568000	65863000	23267000	0	44145000	0	199540000	150690000	72304000	69.715	50.908	16.591	0	134.636	0	62.288	42.781	22.333
Rv0914c|Rv0914c|Possible lipid carrier protein or keto acyl-CoA thiolase|412 AA	141150000	61220000	46508000	128280000	0	0	265420000	105410000	221200000	112.373	47.319	33.164	398.263	0	0	82.853	29.926	68.323
Rv3792|aftA|Arabinofuranosyltransferase AftA|643 AA	0	0	43805000	0	0	28522000	49253000	213920000	106780000	0	0	31.236	0	0	108.662	15.375	60.732	32.982
Rv1900c|lipJ|Probable lignin peroxidase LipJ|462 AA	91887000	27860000	128930000	0	60180000	0	145990000	138060000	153040000	73.154	21.534	91.936	0	183.541	0	45.572	39.195	47.27
Rv3031|Rv3031|Conserved protein|526 AA	20874000	0	45020000	19290000	0	0	118570000	192310000	36412000	16.618	0	32.103	59.889	0	0	37.012	54.597	11.247
Rv1100|Rv1100|Conserved protein|233 AA	141950000	133920000	197590000	0	19616000	0	71271000	110950000	125840000	113.01	103.512	140.896	0	59.826	0	22.248	31.499	38.869
Rv2926c|Rv2926c|Conserved protein|207 AA	108510000	20509000	127380000	0	12412000	0	54648000	101290000	112820000	86.388	15.852	90.831	0	37.855	0	17.059	28.756	34.847
Rv2001|Rv2001|Conserved hypothetical protein|250 AA	250780000	204530000	364200000	0	31015000	0	114090000	152580000	92444000	199.652	158.089	259.701	0	94.591	0	35.614	43.318	28.554
Rv3158|nuoN|Probable NADH dehydrogenase I (chain N) NuoN (NADH-ubiquinone oxidoreductase chain N)|531 AA	0	0	214780000	55155000	0	0	146820000	164520000	107470000	0	0	153.154	171.236	0	0	45.831	46.707	33.195
Rv1993c|Rv1993c|Conserved protein|90 AA	0	17811000	15316000	0	0	0	204910000	0	250760000	0	13.767	10.921	0	0	0	63.964	0	77.454
Rv0485|Rv0485|Possible transcriptional regulatory protein|438 AA	0	0	0	0	83078000	0	132730000	182650000	185730000	0	0	0	0	253.376	0	41.433	51.854	57.367
Rv2343c|dnaG|Probable DNA primase DnaG|639 AA	164200000	78770000	133110000	0	25271000	0	98631000	112570000	125960000	130.724	60.884	94.917	0	77.073	0	30.788	31.959	38.906
Rv3268|Rv3268|Conserved hypothetical protein|229 AA	23708000	0	0	0	93198000	0	247830000	261280000	79797000	18.875	0	0	0	284.241	0	77.362	74.178	24.647
Rv0135c|Rv0135c|Possible transcriptional regulatory protein|201 AA	0	0	0	0	0	53412000	152180000	117970000	156410000	0	0	0	0	0	203.487	47.504	33.492	48.311
Rv1140|Rv1140|Probable integral membrane protein|282 AA	0	0	0	0	45248000	0	185510000	117880000	135670000	0	0	0	0	138	0	57.908	33.466	41.905
Rv0638|secE1|Probable preprotein translocase SecE1|161 AA	165190000	290860000	77219000	137190000	0	0	118760000	232720000	269180000	131.512	224.816	55.063	425.926	0	0	37.072	66.069	83.143
Rv0461|Rv0461|Probable transmembrane protein|174 AA	0	90604000	0	0	0	0	0	209680000	269850000	0	70.031	0	0	0	0	0	59.528	83.35
Rv1878|glnA3|Probable glutamine synthetase GlnA3 (glutamine synthase) (GS-I)|450 AA	41753000	136120000	112410000	0	0	41398000	130440000	134920000	130480000	33.241	105.212	80.156	0	0	157.717	40.718	38.304	40.302
Rv0131c|fadE1|Probable acyl-CoA dehydrogenase FadE1|447 AA	138530000	228390000	422630000	0	109860000	0	253100000	145280000	209710000	110.287	176.531	301.366	0	335.058	0	79.007	41.245	64.774
Rv0415|thiO|Possible thiamine biosynthesis oxidoreductase ThiO|340 AA	18821000	40235000	78663000	21001000	0	0	87910000	118910000	122650000	14.984	31.099	56.092	65.201	0	0	27.442	33.759	37.884
Rv0145|Rv0145|Possible S-adenosylmethionine-dependent methyltransferase|317 AA	0	0	0	48170000	0	0	75687000	278520000	128640000	0	0	0	149.55	0	0	23.626	79.072	39.734
Rv2522c|Rv2522c|Conserved hypothetical protein|470 AA	0	40137000	0	0	84042000	0	273730000	136070000	166930000	0	31.023	0	0	256.317	0	85.447	38.63	51.561
Rv0409|ackA|Probable acetate kinase AckA (acetokinase)|385 AA	116550000	99080000	0	0	42068000	0	224710000	116490000	118400000	92.788	76.583	0	0	128.302	0	70.145	33.072	36.571
Rv1241|vapB33|Possible antitoxin VapB33|86 AA	40731000	0	51492000	0	45439000	0	335630000	261300000	35921000	32.427	0	36.718	0	138.583	0	104.769	74.183	11.095
Rv1011|ispE|Probable 4-diphosphocytidyl-2-C-methyl-D-erythritol kinase IspE (CMK) (4-(cytidine-5-diphospho)-2-C-methyl-D-erythritol kinase)|306 AA	208670000	46723000	54027000	0	0	134170000	152070000	184220000	294300000	166.127	36.114	38.525	0	0	511.157	47.47	52.3	90.902
Rv2237A|Rv2237A|Conserved protein|78 AA	209870000	624700000	247150000	59507000	0	0	185290000	188710000	114350000	167.083	482.854	176.236	184.748	0	0	57.84	53.575	35.32
Rv2869c|rip|Membrane bound metalloprotease|404 AA	84244000	0	99369000	9425700	0	0	89008000	83500000	90420000	67.069	0	70.857	29.263	0	0	27.784	23.706	27.929
Rv0342|iniA|Isoniazid inductible gene protein IniA|640 AA	0	29530000	0	0	38558000	0	147490000	158790000	129550000	0	22.825	0	0	117.597	0	46.04	45.081	40.015
Rv3372|otsB2|Trehalose 6-phosphate phosphatase OtsB2 (trehalose-phosphatase) (TPP)|391 AA	19312000	52972000	54449000	0	0	0	0	85931000	835480000	15.375	40.944	38.826	0	0	0	0	24.396	258.06
Rv3782|glfT1|UDP-galactofuranosyl transferase GlfT1|304 AA	28110000	44522000	40965000	0	0	20555000	49264000	166630000	169590000	22.379	34.413	29.211	0	0	78.31	15.378	47.306	52.382
Rv3278c|Rv3278c|Probable conserved transmembrane protein|172 AA	50089000	155570000	0	0	24484000	0	103730000	94460000	220580000	39.877	120.246	0	0	74.673	0	32.38	26.817	68.132
Rv0139|Rv0139|Possible oxidoreductase|340 AA	0	35902000	0	0	82637000	0	98113000	190190000	386000000	0	27.75	0	0	252.031	0	30.627	53.995	119.226
Rv3581c|ispF|Probable 2C-methyl-D-erythritol 2	0	92418000	334410000	34401000	0	0	124080000	140930000	159760000	0	71.433	238.458	106.803	0	0	38.732	40.01	49.346
Rv1421|Rv1421|Conserved protein|301 AA	182760000	124640000	113130000	0	238560000	0	156140000	373120000	359690000	145.5	96.339	80.67	0	727.575	0	48.74	105.929	111.1
Rv1866|Rv1866|Conserved protein|778 AA	0	0	38358000	61746000	0	0	231780000	231450000	93853000	0	0	27.352	191.699	0	0	72.352	65.709	28.989
Rv2134c|Rv2134c|Conserved protein|195 AA	0	0	94067000	0	26900000	0	102880000	88354000	284430000	0	0	67.077	0	82.041	0	32.115	25.084	87.854
Rv1595|nadB|Probable L-aspartate oxidase NadB|527 AA	32841000	50152000	24629000	0	105940000	0	86802000	229330000	491640000	26.146	38.764	17.562	0	323.102	0	27.096	65.107	151.856
Rv3715c|recR|Probable recombination protein RecR|203 AA	27167000	63002000	48857000	30906000	0	0	88627000	224210000	130140000	21.628	48.697	34.839	95.952	0	0	27.666	63.653	40.197
Rv2949c|Rv2949c|Chorismate pyruvate lyase|199 AA	151060000	252390000	241370000	0	82143000	0	232650000	243020000	147110000	120.263	195.082	172.114	0	250.525	0	72.623	68.994	45.439
Rv1092c|coaA|Probable pantothenate kinase CoaA (pantothenic acid kinase)|312 AA	67912000	129850000	0	0	69338000	0	152980000	164590000	285890000	54.066	100.366	0	0	211.471	0	47.754	46.727	88.304
Rv0513|Rv0513|Possible conserved transmembrane protein|182 AA	118930000	160330000	157640000	0	0	95047000	107700000	411100000	172420000	94.683	123.925	112.409	0	0	362.107	33.619	116.712	53.256
Rv2042c|Rv2042c|Conserved protein|265 AA	0	0	23398000	0	14794000	0	103590000	117520000	131770000	0	0	16.684	0	45.12	0	32.336	33.364	40.701
Rv0074|Rv0074|Conserved protein|411 AA	0	0	66150000	43217000	0	0	216000000	189700000	104480000	0	0	47.17	134.173	0	0	67.426	53.856	32.271
Rv1231c|Rv1231c|Probable membrane protein|180 AA	42823000	0	56700000	39050000	0	0	203380000	144850000	137730000	34.092	0	40.431	121.236	0	0	63.486	41.123	42.541
Rv1428c|Rv1428c|Conserved hypothetical protein|275 AA	0	36581000	0	0	77589000	0	150760000	217050000	268050000	0	28.275	0	0	236.636	0	47.061	61.621	82.794
Rv2358|smtB|Probable transcriptional regulatory protein SmtB (probably ArsR-family)|135 AA	187800000	113780000	82150000	0	0	36326000	120330000	228170000	123950000	149.512	87.945	58.579	0	0	138.394	37.562	64.778	38.285
Rv2959c|Rv2959c|Possible methyltransferase (methylase)|245 AA	56825000	61133000	42996000	123090000	0	0	192160000	267700000	240370000	45.24	47.252	30.659	382.15	0	0	59.984	76	74.244
Rv2622|Rv2622|Possible methyltransferase (methylase)|273 AA	149800000	32771000	35296000	0	42363000	0	396520000	77147000	189510000	119.26	25.33	25.169	0	129.201	0	123.776	21.902	58.535
Rv3033|Rv3033|Unknown protein|182 AA	36091000	40080000	0	32172000	0	0	104550000	176600000	182380000	28.733	30.979	0	99.882	0	0	32.636	50.137	56.333
Rv2539c|aroK|Shikimate kinase AroK (SK)|176 AA	0	28608000	0	0	21879000	0	109710000	153110000	158410000	0	22.112	0	0	66.728	0	34.247	43.468	48.929
Rv2529|Rv2529|Hypothetical protein|463 AA	62347000	61204000	76149000	36397000	0	0	108540000	238320000	148640000	49.636	47.307	54.3	113	0	0	33.882	67.659	45.911
Rv3504|fadE26|Probable acyl-CoA dehydrogenase FadE26|400 AA	43425000	103030000	86397000	0	33377000	0	158780000	277070000	93579000	34.572	79.636	61.607	0	101.795	0	49.564	78.66	28.904
Rv2417c|Rv2417c|Conserved protein|280 AA	0	0	44118000	0	0	22672000	98184000	130960000	205750000	0	0	31.459	0	0	86.375	30.649	37.18	63.551
Rv0483|lprQ|Probable conserved lipoprotein LprQ|451 AA	0	41046000	0	0	0	24213000	121530000	194130000	117750000	0	31.726	0	0	0	92.246	37.936	55.114	36.37
Rv0571c|Rv0571c|Conserved protein|443 AA	0	68610000	25657000	71559000	0	0	176240000	182160000	289850000	0	53.031	18.295	222.165	0	0	55.015	51.715	89.528
Rv2852c|mqo|Probable malate:quinone oxidoreductase Mqo (malate dehydrogenase [acceptor])|493 AA	140390000	204870000	35591000	0	0	126010000	197390000	309040000	254450000	111.768	158.352	25.379	0	0	480.069	61.617	87.737	78.593
Rv3404c|Rv3404c|Conserved hypothetical protein|234 AA	157500000	275300000	40546000	116730000	0	0	188660000	493720000	151840000	125.39	212.79	28.912	362.405	0	0	58.892	140.167	46.9
Rv1381|pyrC|Probable dihydroorotase PyrC (DHOase)|430 AA	312130000	256120000	234480000	0	225250000	0	277940000	279730000	461040000	248.495	197.965	167.201	0	686.981	0	86.761	79.416	142.404
Rv2201|asnB|Probable asparagine synthetase AsnB|652 AA	95945000	78353000	114980000	0	0	28221000	160810000	135330000	177560000	76.384	60.562	81.989	0	0	107.516	50.198	38.42	54.844
Rv3615c|espC|ESX-1 secretion-associated protein EspC|103 AA	283860000	274330000	1006200000	0	0	0	624920000	225820000	0	225.988	212.04	717.493	0	0	0	195.073	64.11	0
Rv2101|helZ|Probable helicase HelZ|1013 AA	80131000	68813000	73257000	0	79140000	0	284910000	220250000	218670000	63.794	53.188	52.238	0	241.366	0	88.937	62.529	67.542
Rv0516c|Rv0516c|Possible anti-anti-sigma factor|158 AA	0	243210000	92632000	0	31635000	0	131550000	251120000	154880000	0	187.986	66.053	0	96.482	0	41.064	71.293	47.839
Rv1234|Rv1234|Probable transmembrane protein|175 AA	36246000	46277000	155760000	0	0	77109000	200530000	193490000	296050000	28.856	35.769	111.068	0	0	293.768	62.597	54.932	91.443
Rv3526|kshA|Oxygenase component of 3-ketosteroid-9-alpha-hydroxylase KshA|386 AA	59248000	53505000	0	0	0	74169000	303610000	206910000	198350000	47.169	41.356	0	0	0	282.567	94.774	58.742	61.266
Rv1621c|cydD|Probable component linked with the assembly of cytochrome transport transmembrane ATP-binding protein ABC transporter CydD|527 AA	107970000	106730000	0	40612000	0	0	224930000	170970000	191800000	85.958	82.496	0	126.086	0	0	70.213	48.538	59.242
Rv0538|Rv0538|Possible conserved membrane protein|548 AA	260130000	132740000	178030000	0	0	138910000	276350000	345620000	241250000	207.096	102.6	126.948	0	0	529.215	86.265	98.122	74.516
Rv2503c|scoB|Probable succinyl-CoA:3-ketoacid-coenzyme A transferase (beta subunit) ScoB (3-oxo-acid:CoA transferase) (OXCT B) (succinyl CoA:3-oxoacid CoA-transferase)|218 AA	216250000	310810000	47196000	0	0	0	0	427390000	405300000	172.162	240.237	33.654	0	0	0	0	121.336	125.187
Rv0858c|dapC|Probable N-succinyldiaminopimelate aminotransferase DapC (DAP-at)|397 AA	85854000	39824000	126790000	30400000	0	0	174420000	183020000	171440000	68.351	30.781	90.41	94.381	0	0	54.446	51.959	52.954
Rv3713|cobQ2|Possible cobyric acid synthase CobQ2|231 AA	136760000	97141000	0	0	111130000	0	156390000	334560000	414650000	108.878	75.084	0	0	338.931	0	48.818	94.982	128.075
Rv3856c|Rv3856c|Conserved hypothetical protein|335 AA	0	0	0	32888000	0	0	111050000	239970000	219060000	0	0	0	102.105	0	0	34.665	68.128	67.662
Rv3773c|Rv3773c|Conserved protein|194 AA	49390000	137240000	177770000	38795000	0	0	138690000	214960000	241830000	39.321	106.078	126.763	120.444	0	0	43.293	61.027	74.695
Rv1601|hisB|Probable imidazole glycerol-phosphate dehydratase HisB|210 AA	0	90606000	107470000	113650000	0	0	606540000	427740000	85636000	0	70.033	76.634	352.842	0	0	189.336	121.436	26.451
Rv0332|Rv0332|Conserved protein|261 AA	114690000	208540000	198480000	0	128540000	0	382890000	361350000	207660000	91.308	161.188	141.531	0	392.029	0	119.522	102.588	64.141
Rv3080c|pknK|Serine/threonine-protein kinase transcriptional regulatory protein PknK (protein kinase K) (STPK K)|1110 AA	0	0	46240000	0	21422000	0	160360000	341830000	80841000	0	0	32.972	0	65.334	0	50.057	97.046	24.97
Rv2743c|Rv2743c|Possible conserved transmembrane alanine rich protein|270 AA	182090000	0	44792000	0	5095700	0	223160000	216640000	22842000	144.966	0	31.94	0	15.541	0	69.661	61.504	7.055
Rv0321|dcd|Probable deoxycytidine triphosphate deaminase Dcd (dCTP deaminase)|190 AA	78511000	0	31471000	0	53027000	0	225990000	247400000	217970000	62.505	0	22.441	0	161.725	0	70.544	70.237	67.326
Rv2035|Rv2035|Conserved hypothetical protein|162 AA	25078000	57711000	219260000	0	0	114820000	410080000	382350000	146030000	19.965	44.607	156.348	0	0	437.438	128.009	108.549	45.105
Rv3076|Rv3076|Conserved hypothetical protein|158 AA	213230000	0	336710000	0	85793000	0	4614600000	60393000	111520000	169.758	0	240.099	0	261.657	0	1440.48	17.146	34.446
Rv0170|mce1B|Mce-family protein Mce1B|346 AA	24122000	121820000	107110000	0	104580000	0	203390000	442210000	264110000	19.204	94.159	76.377	0	318.955	0	63.49	125.544	81.577
Rv1707|Rv1707|Probable conserved transmembrane protein|486 AA	0	0	108060000	42407000	0	0	408050000	269470000	85331000	0	0	77.055	131.658	0	0	127.376	76.503	26.357
Rv2499c|Rv2499c|Possible oxidase regulatory-related protein|185 AA	0	0	0	0	0	27487000	129930000	254540000	175830000	0	0	0	0	0	104.719	40.559	72.264	54.31
Rv2152c|murC|Probable UDP-N-acetylmuramate-alanine ligase MurC|494 AA	58659000	96813000	48627000	0	24557000	0	179590000	212010000	165120000	46.7	74.83	34.675	0	74.895	0	56.06	60.19	51.002
Rv0633c|Rv0633c|Possible exported protein|279 AA	72486000	69945000	80327000	0	55012000	0	218880000	249210000	266790000	57.708	54.063	57.279	0	167.779	0	68.325	70.751	82.405
Rv1665|pks11|Chalcone synthase Pks11|353 AA	61548000	98001000	27188000	0	28656000	0	159880000	166280000	289850000	49	75.749	19.387	0	87.397	0	49.908	47.207	89.528
Rv2855|mtr|NADPH-dependent mycothiol reductase Mtr|459 AA	44101000	44939000	83088000	24145000	0	0	181740000	189440000	166860000	35.11	34.735	59.248	74.962	0	0	56.731	53.782	51.539
Rv1659|argH|Probable argininosuccinate lyase ArgH|470 AA	0	161590000	135930000	0	125030000	0	325910000	349840000	293570000	0	124.899	96.928	0	381.324	0	101.735	99.32	90.677
Rv2182c|Rv2182c|1-acylglycerol-3-phosphate O-acyltransferase|247 AA	143250000	475670000	366410000	0	35124000	0	428040000	139430000	176690000	114.045	367.663	261.277	0	107.123	0	133.616	39.584	54.575
Rv3304|Rv3304|Conserved protein|159 AA	381360000	497640000	459330000	0	198960000	0	423480000	322520000	433180000	303.61	384.644	327.535	0	606.801	0	132.192	91.564	133.799
Rv0543c|Rv0543c|Conserved protein|100 AA	0	170180000	0	0	443520000	0	539090000	607850000	384140000	0	131.538	0	0	1352.67	0	168.281	172.569	118.652
Rv2764c|thyA|Probable thymidylate synthase ThyA (ts) (TSASE)|263 AA	38080000	0	0	0	0	61360000	186140000	344940000	224330000	30.316	0	0	0	0	233.768	58.105	97.929	69.29
Rv1406|fmt|Probable methionyl-tRNA formyltransferase Fmt|312 AA	129880000	228830000	135210000	0	55351000	0	287650000	184900000	324460000	103.401	176.871	96.414	0	168.813	0	89.792	52.493	100.218
Rv2678c|hemE|Probable uroporphyrinogen decarboxylase HemE (uroporphyrinogen III decarboxylase) (URO-D) (UPD)|357 AA	120980000	79669000	93239000	45018000	0	0	135030000	293310000	288530000	96.315	61.579	66.486	139.765	0	0	42.151	83.271	89.12
Rv0356c|Rv0356c|Conserved protein|214 AA	158720000	51555000	136270000	24829000	0	0	57528000	330870000	310700000	126.361	39.849	97.17	77.085	0	0	17.958	93.934	95.968
Rv0899|ompA|Outer membrane protein A OmpA|326 AA	135100000	148920000	160610000	0	0	38937000	275090000	161160000	242120000	107.557	115.106	114.527	0	0	148.341	85.871	45.753	74.785
Rv3275c|purE|Probable phosphoribosylaminoimidazole carboxylase catalytic subunit PurE (air carboxylase) (AIRC)|174 AA	115830000	279900000	98913000	32784000	0	0	387650000	272980000	84800000	92.215	216.345	70.532	101.783	0	0	121.008	77.499	26.193
Rv0221|Rv0221|Possible triacylglycerol synthase (diacylglycerol acyltransferase)|469 AA	22719000	176770000	67835000	0	36168000	0	198080000	214020000	260600000	18.087	136.632	48.371	0	110.307	0	61.832	60.76	80.493
Rv0959|Rv0959|Conserved hypothetical protein|672 AA	303890000	923190000	212180000	0	0	40058000	391910000	181950000	169900000	241.934	713.568	151.3	0	0	152.612	122.337	51.656	52.478
Rv1923|lipD|Probable lipase LipD|446 AA	483040000	530840000	117750000	0	117840000	0	470170000	203260000	456080000	384.56	410.306	83.964	0	359.396	0	146.767	57.706	140.872
Rv2948c|fadD22|P-hydroxybenzoyl-AMP ligase FadD22|705 AA	0	0	0	0	0	44682000	259640000	216560000	244720000	0	0	0	0	0	170.228	81.048	61.482	75.588
Rv0365c|Rv0365c|Conserved protein|376 AA	117680000	0	36630000	0	0	39931000	200620000	299460000	193880000	93.688	0	26.12	0	0	152.128	62.625	85.017	59.885
Rv0599c|vapB27|Possible antitoxin VapB27|78 AA	81939000	98367000	210030000	102420000	0	0	296160000	467240000	237840000	65.234	76.031	149.767	317.977	0	0	92.448	132.65	73.463
Rv1444c|Rv1444c|Unknown protein|136 AA	36709000	50448000	39123000	0	0	114420000	491050000	263430000	316300000	29.225	38.993	27.898	0	0	435.914	153.285	74.788	97.697
Rv2533c|nusB|N utilization substance protein NusB (NusB protein)|156 AA	0	302040000	308010000	0	0	149790000	534710000	327280000	302850000	0	233.458	219.633	0	0	570.666	166.913	92.915	93.543
Rv3342|Rv3342|Possible methyltransferase (methylase)|243 AA	63358000	79676000	26705000	0	48111000	0	292900000	200230000	345840000	50.441	61.585	19.043	0	146.732	0	91.431	56.845	106.822
Rv2474c|Rv2474c|Conserved hypothetical protein|217 AA	34534000	60676000	68184000	4897000	0	0	102910000	178090000	93898000	27.493	46.899	48.62	15.203	0	0	32.124	50.56	29.003
Rv3218|Rv3218|Conserved protein|321 AA	129290000	59656000	31894000	0	39789000	0	269010000	243580000	260990000	102.931	46.11	22.743	0	121.351	0	83.973	69.153	80.613
Rv1654|argB|Probable acetylglutamate kinase ArgB|294 AA	184300000	101320000	264930000	0	196150000	0	302180000	499150000	542740000	146.726	78.314	188.914	0	598.23	0	94.328	141.709	167.639
Rv0013|trpG|Possible anthranilate synthase component II TrpG (glutamine amidotransferase)|232 AA	242660000	299710000	127750000	47098000	0	0	162020000	333770000	357100000	193.188	231.657	91.095	146.222	0	0	50.576	94.758	110.3
Rv3013|Rv3013|Conserved protein|218 AA	55667000	23791000	0	0	84240000	0	454490000	325400000	290250000	44.318	18.389	0	0	256.92	0	141.872	92.381	89.651
Rv0349|Rv0349|Hypothetical protein|219 AA	0	63323000	67385000	0	0	17888000	194000000	207480000	192620000	0	48.945	48.05	0	0	68.149	60.558	58.904	59.496
Rv2911|dacB2|Probable penicillin-binding protein DacB2 (D-alanyl-D-alanine carboxypeptidase) (DD-peptidase) (DD-carboxypeptidase) (PBP) (DD-transpeptidase) (serine-type D-ala-D-ala carboxypeptidase) (D-amino acid hydrolase)|291 AA	99367000	172650000	389210000	0	152310000	0	381010000	427930000	476710000	79.109	133.448	277.535	0	464.525	0	118.935	121.49	147.244
Rv0759c|Rv0759c|Conserved hypothetical protein|110 AA	54306000	137330000	0	75401000	0	0	288210000	399410000	297650000	43.234	106.147	0	234.093	0	0	89.967	113.393	91.937
Rv1719|Rv1719|Probable transcriptional regulatory protein|259 AA	37692000	152040000	0	38135000	0	0	335580000	214940000	264540000	30.008	117.517	0	118.395	0	0	104.754	61.022	81.71
Rv0199|Rv0199|Probable conserved membrane protein|219 AA	118360000	63438000	122690000	0	39395000	0	355140000	260150000	235960000	94.229	49.034	87.487	0	120.149	0	110.859	73.857	72.882
Rv3819|Rv3819|Unknown protein|111 AA	136460000	98799000	181010000	0	39190000	0	265750000	355780000	229970000	108.639	76.365	129.073	0	119.524	0	82.956	101.006	71.032
Rv3156|nuoL|Probable NADH dehydrogenase I (chain L) NuoL (NADH-ubiquinone oxidoreductase chain L)|633 AA	228580000	93772000	24503000	11729000	0	0	164350000	257050000	137030000	181.978	72.48	17.472	36.414	0	0	51.303	72.977	42.325
Rv0230c|php|Probable phosphotriesterase Php (parathion hydrolase) (PTE) (aryldialkylphosphatase) (paraoxonase) (a-esterase) (aryltriphosphatase) (paraoxon hydrolase)|326 AA	264810000	237410000	0	45936000	0	0	187230000	262320000	486340000	210.822	183.503	0	142.615	0	0	58.445	74.473	150.219
Rv3039c|echA17|Probable enoyl-CoA hydratase EchA17 (crotonase) (unsatured acyl-CoA hydratase) (enoyl hydrase)|254 AA	85114000	0	29938000	31488000	0	0	322470000	321790000	161320000	67.761	0	21.348	97.759	0	0	100.661	91.356	49.828
Rv1180|pks3|Probable polyketide beta-ketoacyl synthase Pks3|488 AA	101520000	67201000	293670000	0	84800000	0	342650000	323190000	479270000	80.823	51.942	209.408	0	258.628	0	106.961	91.754	148.035
Rv3057c|Rv3057c|Probable short chain alcohol dehydrogenase/reductase|287 AA	0	0	24575000	0	0	102150000	367090000	412910000	349720000	0	0	17.524	0	0	389.168	114.59	117.225	108.02
Rv0738|Rv0738|Conserved protein|182 AA	278210000	163000000	187080000	0	279380000	0	407520000	670910000	606090000	221.49	125.989	133.402	0	852.071	0	127.21	190.472	187.207
Rv1633|uvrB|Probable excinuclease ABC (subunit B - helicase) UvrB|698 AA	123380000	106990000	102450000	0	0	23190000	110220000	396270000	257290000	98.226	82.697	73.054	0	0	88.349	34.406	112.501	79.471
Rv0177|Rv0177|Probable conserved Mce associated protein|184 AA	100080000	188370000	0	169020000	0	0	238980000	667730000	573060000	79.676	145.598	0	524.746	0	0	74.599	189.569	177.004
Rv3015c|Rv3015c|Conserved hypothetical protein|337 AA	175460000	19335000	242960000	0	0	68730000	297630000	450870000	286010000	139.688	14.945	173.248	0	0	261.846	92.907	128.002	88.342
Rv1101c|Rv1101c|Conserved membrane protein|385 AA	125130000	96285000	195200000	15983000	0	0	229710000	187590000	240650000	99.619	74.422	139.192	49.621	0	0	71.706	53.257	74.331
Rv2609c|Rv2609c|Probable conserved membrane protein|351 AA	152390000	188060000	177870000	28615000	0	0	149530000	374340000	313540000	121.322	145.359	126.834	88.839	0	0	46.677	106.275	96.845
Rv3814c|Rv3814c|Possible acyltransferase|261 AA	108700000	137730000	128060000	0	46817000	0	360450000	519590000	183550000	86.539	106.457	91.316	0	142.785	0	112.517	147.512	56.694
Rv2153c|murG|Probable UPD-N-acetylglucosamine-N-acetylmuramyl-(pentapeptide) pyrophosphoryl-undecaprenol-N-acetylglucosamine transferase MurG|410 AA	0	0	66632000	0	60945000	0	374880000	511080000	242210000	0	0	47.513	0	185.874	0	117.021	145.096	74.813
Rv1540|Rv1540|Conserved hypothetical protein member of yabO/yceC/yfiI family|308 AA	96548000	133100000	154870000	0	0	42722000	298140000	346340000	281810000	76.864	102.878	110.433	0	0	162.761	93.066	98.326	87.044
Rv0171|mce1C|Mce-family protein Mce1C|515 AA	89089000	29868000	60701000	0	29958000	0	290010000	353250000	232950000	70.926	23.086	43.284	0	91.368	0	90.529	100.288	71.953
Rv2726c|dapF|Probable diaminopimelate epimerase DapF (DAP epimerase)|289 AA	203180000	286010000	288180000	13611000	0	0	189440000	204040000	261090000	161.757	221.068	205.493	42.257	0	0	59.135	57.927	80.644
Rv0266c|oplA|Probable 5-oxoprolinase OplA (5-oxo-L-prolinase) (pyroglutamase) (5-OPASE)|1209 AA	14614000	40191000	0	0	0	9900800	265580000	211930000	127110000	11.635	31.065	0	0	0	37.72	82.903	60.167	39.261
Rv0505c|serB1|Possible phosphoserine phosphatase SerB1 (PSP) (O-phosphoserine phosphohydrolase) (pspase)|373 AA	0	25179000	177610000	0	0	45504000	286470000	303270000	385690000	0	19.462	126.649	0	0	173.36	89.424	86.099	119.13
Rv0334|rmlA|Alpha-D-glucose-1-phosphate thymidylyltransferase RmlA (dTDP-glucose synthase) (dTDP-glucose pyrophosphorylase)|288 AA	17704000	263770000	502290000	108420000	0	0	288020000	524410000	553470000	14.095	203.878	358.169	336.605	0	0	89.907	148.88	170.953
Rv1523|Rv1523|Probable methyltransferase|347 AA	37364000	65952000	0	0	0	43491000	121880000	607870000	408100000	29.746	50.977	0	0	0	165.691	38.046	172.575	126.052
Rv3674c|nth|Probable endonuclease III Nth (DNA-(apurinic or apyrimidinic site)lyase) (AP lyase) (AP endonuclease class I) (endodeoxyribonuclease (apurinic or apyrimidinic)) (deoxyribonuclease (apurinic or apyrimidinic))|245 AA	138460000	42001000	115690000	0	0	122670000	277370000	647630000	504480000	110.231	32.464	82.495	0	0	467.345	86.583	183.863	155.822
Rv1492|mutA|Probable methylmalonyl-CoA mutase small subunit MutA (MCM)|615 AA	0	46005000	0	0	77890000	0	569020000	342110000	416820000	0	35.559	0	0	237.554	0	177.624	97.125	128.746
Rv3255c|manA|Probable mannose-6-phosphate isomerase ManA (phosphomannose isomerase) (phosphomannoisomerase) (PMI) (phosphohexoisomerase) (phosphohexomutase)|408 AA	184650000	38982000	194460000	0	218820000	0	577190000	632080000	625590000	147.005	30.131	138.664	0	667.371	0	180.174	179.448	193.23
Rv1363c|Rv1363c|Possible membrane protein|261 AA	248210000	216870000	226840000	0	30078000	0	245610000	352510000	349870000	197.606	167.627	161.753	0	91.734	0	76.669	100.078	108.066
Rv1875|Rv1875|Conserved protein|147 AA	828060000	273770000	1326500000	295720000	0	0	307910000	1157100000	692390000	659.239	211.607	945.89	918.104	0	0	96.116	328.501	213.862
Rv1498c|Rv1498c|Probable methyltransferase|205 AA	0	229520000	62006000	0	199910000	0	882670000	442980000	636290000	0	177.404	44.215	0	609.698	0	275.532	125.762	196.535
Rv3095|Rv3095|Hypothetical transcriptional regulatory protein|158 AA	0	31300000	37230000	0	17329000	0	130910000	477050000	278710000	0	24.193	26.548	0	52.851	0	40.864	135.435	86.087
Rv0854|Rv0854|Conserved protein|147 AA	835930000	383710000	284350000	0	0	172600000	444090000	613630000	617010000	665.505	296.584	202.762	0	0	657.566	138.626	174.21	190.579
Rv3502c|Rv3502c|Probable short-chain type dehydrogenase/reductase. Possible 17-beta-hydroxysteroid dehydrogenase.|317 AA	80858000	107860000	65655000	0	0	51644000	153510000	1468700000	182560000	64.373	83.369	46.817	0	0	196.752	47.919	416.965	56.388
Rv2632c|Rv2632c|Conserved protein|93 AA	1152900000	467900000	1087300000	0	36804000	0	391410000	405440000	275570000	917.853	361.657	775.323	0	112.247	0	122.181	115.105	85.117
Rv0634c|Rv0634c|Possible glyoxalase II (hydroxyacylglutathione hydrolase) (GLX II)|237 AA	78318000	117600000	117130000	0	20366000	0	49879000	693010000	572400000	62.351	90.897	83.522	0	62.113	0	15.57	196.746	176.8
Rv1593c|Rv1593c|Conserved protein|236 AA	414910000	444770000	121440000	0	79396000	0	700030000	647650000	212300000	330.32	343.779	86.595	0	242.147	0	218.519	183.868	65.574
Rv1797|eccE5|ESX conserved component EccE5. ESX-5 type VII secretion system protein. Probable membrane protein.|406 AA	128010000	167520000	89525000	0	0	89570000	407880000	458290000	504940000	101.912	129.482	63.838	0	0	341.241	127.323	130.109	155.964
Rv0045c|Rv0045c|Possible hydrolase|298 AA	71286000	44645000	72823000	0	0	44151000	582730000	345070000	256600000	56.753	34.508	51.928	0	0	168.205	181.903	97.966	79.258
Rv2732c|Rv2732c|Probable conserved transmembrane protein|204 AA	96303000	153000000	144980000	10025000	0	0	236420000	243720000	204550000	76.669	118.259	103.381	31.124	0	0	73.8	69.192	63.181
Rv1072|Rv1072|Probable conserved transmembrane protein|278 AA	442820000	0	145560000	0	0	55544000	299710000	473310000	445620000	352.54	0	103.795	0	0	211.61	93.557	134.373	137.641
Rv2386c|mbtI|Isochorismate synthase MbtI|450 AA	0	0	0	0	13185000	0	161090000	274490000	404400000	0	0	0	0	40.212	0	50.285	77.928	124.909
Rv2692|ceoC|TRK system potassium uptake protein CeoC|220 AA	81367000	0	0	0	54471000	0	269980000	594940000	442500000	64.778	0	0	0	166.129	0	84.276	168.904	136.678
Rv3634c|galE1|UDP-glucose 4-epimerase GalE1 (galactowaldenase) (UDP-galactose 4-epimerase) (uridine diphosphate galactose 4-epimerase) (uridine diphospho-galactose 4-epimerase)|314 AA	565280000	297030000	343040000	85123000	0	0	326840000	837810000	357940000	450.034	229.585	244.612	264.276	0	0	102.025	237.855	110.559
Rv0862c|Rv0862c|Conserved protein|756 AA	32852000	44299000	45053000	14037000	0	0	156780000	306550000	366130000	26.154	34.24	32.126	43.58	0	0	48.94	87.03	113.089
Rv1605|hisF|Probable cyclase HisF|267 AA	165150000	150620000	176670000	23354000	0	0	204830000	302280000	547960000	131.48	116.42	125.978	72.506	0	0	63.939	85.817	169.252
Rv0757|phoP|Possible two component system response transcriptional positive regulator PhoP|247 AA	432160000	329250000	215530000	0	161260000	0	587370000	716860000	662200000	344.053	254.49	153.688	0	491.821	0	183.352	203.517	204.538
Rv2718c|nrdR|Probable transcriptional regulatory protein NrdR|154 AA	188230000	194880000	201850000	0	0	36158000	489040000	328490000	363260000	149.855	150.63	143.934	0	0	137.754	152.657	93.259	112.202
Rv0772|purD|Probable phosphoribosylamine--glycine ligase PurD (GARS) (glycinamide ribonucleotide synthetase) (phosphoribosylglycinamide synthetase) (5-phosphoribosylglycinamide synthetase)|422 AA	122090000	425350000	200420000	80049000	0	0	789000000	388390000	459280000	97.199	328.769	142.914	248.523	0	0	246.292	110.264	141.86
Rv3061c|fadE22|Probable acyl-CoA dehydrogenase FadE22|721 AA	328960000	129120000	246370000	0	0	17129000	279400000	368780000	272540000	261.893	99.802	175.68	0	0	65.258	87.217	104.697	84.181
Rv1215c|Rv1215c|Conserved protein|561 AA	175610000	243200000	75118000	41946000	0	0	223840000	562730000	585530000	139.808	187.978	53.565	130.227	0	0	69.873	159.759	180.856
Rv1338|murI|Probable glutamate racemase MurI|271 AA	15480000	0	113760000	0	30544000	0	257740000	486350000	513800000	12.324	0	81.119	0	93.155	0	80.455	138.075	158.7
Rv0810c|Rv0810c|Conserved hypothetical protein|60 AA	236360000	554400000	233980000	0	44068000	0	651670000	556480000	286210000	188.172	428.516	166.845	0	134.401	0	203.423	157.985	88.403
Rv1855c|Rv1855c|Possible oxidoreductase|307 AA	1107500000	758700000	977130000	322490000	0	0	643840000	863650000	1224200000	881.709	586.427	696.764	1001.22	0	0	200.979	245.191	378.126
Rv0431|Rv0431|Putative tuberculin related peptide|164 AA	61166000	88497000	168820000	0	17758000	0	375850000	369550000	341130000	48.696	68.403	120.381	0	54.159	0	117.324	104.915	105.367
Rv1304|atpB|Probable ATP synthase a chain AtpB (protein 6)|250 AA	60539000	0	298470000	0	0	12762000	157280000	422800000	418870000	48.197	0	212.831	0	0	48.62	49.096	120.033	129.379
Rv1220c|Rv1220c|Probable methyltransferase|215 AA	0	115770000	0	0	0	92804000	907090000	475940000	560250000	0	89.483	0	0	0	353.562	283.154	135.12	173.048
Rv0008c|Rv0008c|Possible membrane protein|145 AA	166700000	0	99337000	0	9425900	0	476360000	143030000	438950000	132.714	0	70.834	0	28.748	0	148.699	40.606	135.581
Rv2449c|Rv2449c|Conserved protein|419 AA	404060000	177620000	224800000	0	0	94327000	497790000	858270000	500370000	321.682	137.289	160.299	0	0	359.364	155.389	243.663	154.552
Rv1335|cysO|Sulfur carrier protein CysO|93 AA	598740000	375890000	410360000	0	0	62866000	544240000	655850000	430880000	476.672	290.539	292.616	0	0	239.505	169.888	186.196	133.088
Rv0954|Rv0954|Probable conserved transmembrane protein|303 AA	0	72469000	126190000	0	68401000	0	502130000	652510000	627070000	0	56.014	89.983	0	208.614	0	156.743	185.248	193.687
Rv0979A|rpmF|50S ribosomal protein L32 RpmF|57 AA	55890000	0	0	103100000	0	0	431750000	633490000	1104300000	44.495	0	0	320.088	0	0	134.774	179.848	341.092
Rv2930|fadD26|Fatty-acid-AMP ligase FadD26 (fatty-acid-AMP synthetase) (fatty-acid-AMP synthase)|583 AA	62198000	0	120920000	0	45086000	0	361470000	852910000	452550000	49.517	0	86.225	0	137.506	0	112.835	242.142	139.782
Rv1071c|echA9|Possible enoyl-CoA hydratase EchA9 (enoyl hydrase) (unsaturated acyl-CoA hydratase) (crotonase)|345 AA	306460000	181430000	653230000	131480000	0	0	527680000	908750000	789980000	243.981	140.234	465.8	408.198	0	0	164.719	257.995	244.006
Rv0732|secY|Probable preprotein translocase SecY|441 AA	80835000	0	165340000	0	252640000	0	1021400000	1210300000	700460000	64.355	0	117.899	0	770.517	0	318.837	343.605	216.355
Rv1894c|Rv1894c|Conserved hypothetical protein|376 AA	256530000	41556000	422080000	0	0	54504000	461310000	771850000	496550000	204.23	32.12	300.974	0	0	207.648	144.001	219.129	153.372
Rv3838c|pheA|Prephenate dehydratase PheA|321 AA	289240000	320400000	267160000	32606000	0	0	271530000	678630000	590410000	230.271	247.649	190.504	101.23	0	0	84.76	192.664	182.363
Rv2412|rpsT|30S ribosomal protein S20 RpsT|86 AA	219540000	0	347240000	0	0	99714000	695540000	805990000	632120000	174.781	0	247.607	0	0	379.887	217.118	228.821	195.247
Rv1340|rphA|Probable ribonuclease RphA (RNase PH) (tRNA nucleotidyltransferase)|259 AA	127480000	111090000	64131000	122390000	0	0	735360000	733300000	899400000	101.49	85.866	45.73	379.977	0	0	229.548	208.184	277.803
Rv3210c|Rv3210c|Conserved protein|231 AA	29777000	0	282110000	7595100	0	0	260870000	400360000	279470000	23.706	0	201.165	23.58	0	0	81.432	113.662	86.322
Rv0427c|xthA|Probable exodeoxyribonuclease III protein XthA (exonuclease III) (EXO III) (AP endonuclease VI)|291 AA	62310000	88860000	74973000	0	0	12403000	346280000	350410000	405260000	49.607	68.683	53.461	0	0	47.253	108.094	99.482	125.175
Rv1638|uvrA|Probable excinuclease ABC (subunit A - DNA-binding ATPase) UvrA|972 AA	184960000	291670000	212620000	174400000	0	0	958280000	1024100000	757340000	147.251	225.443	151.613	541.449	0	0	299.134	290.743	233.924
Rv1106c|Rv1106c|3-beta-hydroxysteroid dehydrogenase|370 AA	0	78380000	381850000	0	11353000	0	156220000	496490000	644890000	0	60.583	272.287	0	34.625	0	48.765	140.954	199.191
Rv0389|purT|Probable phosphoribosylglycinamide formyltransferase 2 PurT (GART 2) (gar transformylase 2) (5-phosphoribosylglycinamide transformylase 2) (formate-dependent gar transformylase)|419 AA	233580000	204160000	206060000	0	0	24595000	942570000	420310000	288730000	185.959	157.803	146.936	0	0	93.701	294.23	119.326	89.182
Rv0347|Rv0347|Probable conserved membrane protein|328 AA	373160000	103740000	52696000	110300000	0	0	505380000	1055500000	956000000	297.082	80.184	37.576	342.442	0	0	157.758	299.657	295.285
Rv0069c|sdaA|Probable L-serine dehydratase SdaA (L-serine deaminase) (SDH) (L-SD)|461 AA	0	0	0	0	22563000	0	620340000	478890000	464600000	0	0	0	0	68.814	0	193.643	135.957	143.504
Rv1311|atpC|Probable ATP synthase epsilon chain AtpC|121 AA	86809000	310700000	328380000	0	78710000	0	1073700000	1403900000	291760000	69.111	240.152	234.159	0	240.055	0	335.163	398.568	90.118
Rv3816c|Rv3816c|Possible acyltransferase|259 AA	227380000	676850000	605240000	0	170770000	0	1157700000	792240000	1344700000	181.023	523.162	431.58	0	520.825	0	361.384	224.917	415.345
Rv1261c|Rv1261c|Conserved protein|149 AA	149210000	136250000	221120000	0	22692000	0	277560000	720550000	690480000	118.79	105.313	157.675	0	69.207	0	86.642	204.565	213.273
Rv1334|mec|Possible hydrolase|146 AA	314490000	171030000	186650000	20910000	0	0	694900000	419520000	465530000	250.373	132.195	133.095	64.918	0	0	216.918	119.102	143.791
Rv1769|Rv1769|Conserved protein|414 AA	425750000	751030000	275220000	98394000	0	0	1137900000	755930000	809760000	338.95	580.499	196.252	305.478	0	0	355.203	214.609	250.115
Rv3046c|Rv3046c|Conserved protein|124 AA	489070000	520200000	542810000	0	0	118360000	909350000	1020900000	830310000	389.361	402.082	387.063	0	0	450.924	283.86	289.834	256.463
Rv3340|metC|Probable O-acetylhomoserine sulfhydrylase MetC (homocysteine synthase) (O-acetylhomoserine (thiol)-lyase) (OAH sulfhydrylase) (O-acetyl-L-homoserine sulfhydrylase)|449 AA	78815000	238690000	461210000	103730000	0	0	819200000	722570000	1313000000	62.747	184.492	328.876	322.044	0	0	255.719	205.138	405.554
Rv2197c|Rv2197c|Probable conserved transmembrane protein|214 AA	98033000	138330000	140330000	0	0	40876000	888960000	577270000	597270000	78.047	106.92	100.065	0	0	155.728	277.495	163.887	184.482
Rv0007|Rv0007|Possible conserved membrane protein|304 AA	1210700000	1060300000	953420000	0	0	144710000	1812400000	887780000	834030000	963.869	819.545	679.857	0	0	551.312	565.753	252.041	257.612
Rv0654|Rv0654|Probable dioxygenase|501 AA	168880000	91433000	166500000	0	129870000	0	1040400000	1212900000	976150000	134.45	70.672	118.727	0	396.086	0	324.768	344.343	301.509
Rv0092|ctpA|Cation transporter P-type ATPase a CtpA|761 AA	42688000	316630000	0	0	37159000	0	243330000	239750000	7571500000	33.985	244.735	0	0	113.33	0	75.957	68.065	2338.65
Rv3086|adhD|Probable zinc-type alcohol dehydrogenase AdhD (aldehyde reductase)|368 AA	47385000	47292000	28881000	43269000	0	0	850520000	637170000	792630000	37.724	36.554	20.594	134.335	0	0	265.496	180.893	244.824
Rv3834c|serS|SERYL-tRNA synthetase SerS (serine--tRNA ligase) (SERRS) (serine translase)|419 AA	203060000	272970000	181570000	0	0	91028000	880590000	877900000	1104700000	161.661	210.989	129.473	0	0	346.796	274.882	249.236	341.215
Rv2374c|hrcA|Probable heat shock protein transcriptional repressor HrcA|343 AA	110740000	79041000	250420000	0	0	44541000	713590000	942630000	587240000	88.163	61.094	178.568	0	0	169.691	222.752	267.613	181.384
Rv0233|nrdB|Ribonucleoside-diphosphate reductase (beta chain) NrdB (ribonucleotide reductase small chain)|314 AA	0	0	0	0	0	12875000	506110000	779220000	291300000	0	0	0	0	0	49.051	157.986	221.221	89.976
Rv0981|mprA|Mycobacterial persistence regulator MRPA (two component response transcriptional regulatory protein)|228 AA	127360000	173340000	206150000	0	0	17822000	473190000	644200000	560150000	101.395	133.981	147	0	0	67.898	147.71	182.889	173.017
Rv3921c|Rv3921c|Probable conserved transmembrane protein|366 AA	690000000	512630000	264690000	0	20334000	0	690370000	587010000	595030000	549.326	396.231	188.743	0	62.016	0	215.504	166.653	183.79
Rv0222|echA1|Probable enoyl-CoA hydratase EchA1 (enoyl hydrase) (unsaturated acyl-CoA hydratase) (crotonase)|262 AA	169930000	555790000	508030000	146310000	0	0	864940000	1336400000	1273200000	135.286	429.591	362.262	454.24	0	0	269.997	379.405	393.261
Rv1932|tpx|Probable thiol peroxidase Tpx|165 AA	5968800000	6379000000	1284500000	0	257930000	0	1878800000	1432500000	1463000000	4751.91	4930.56	915.941	0	786.651	0	586.48	406.688	451.885
Rv2782c|pepR|Probable zinc protease PepR|438 AA	271320000	386420000	29881000	22698000	0	0	370570000	873800000	936890000	216.005	298.678	21.307	70.469	0	0	115.676	248.072	289.383
Rv3761c|fadE36|Possible acyl-CoA dehydrogenase FadE36|351 AA	241270000	88439000	84782000	176660000	0	0	1298400000	1580900000	1262600000	192.081	68.358	60.456	548.466	0	0	405.305	448.819	389.987
Rv1599|hisD|Probable histidinol dehydrogenase HisD (HDH)|438 AA	172930000	248840000	250830000	45956000	0	0	722110000	1043100000	963830000	137.674	192.338	178.86	142.677	0	0	225.412	296.137	297.704
Rv1483|fabG1|3-oxoacyl-[acyl-carrier protein] reductase FabG1 (3-ketoacyl-acyl carrier protein reductase) (mycolic acid biosynthesis a protein)|247 AA	1329100000	1884300000	1230800000	0	0	129750000	928440000	1653500000	1348000000	1058.13	1456.44	877.649	0	0	494.318	289.819	469.43	416.365
Rv2699c|Rv2699c|Conserved hypothetical protein|100 AA	1025300000	2091800000	914400000	81459000	0	0	3228900000	813870000	805950000	816.267	1616.83	652.033	252.901	0	0	1007.92	231.058	248.938
Rv2061c|Rv2061c|Conserved protein|134 AA	207870000	823900000	211530000	0	0	248620000	1543600000	1890900000	1796600000	165.491	636.823	150.836	0	0	947.185	481.845	536.828	554.926
Rv3043c|ctaD|Probable cytochrome C oxidase polypeptide I CtaD (cytochrome AA3 subunit 1)|573 AA	358210000	85922000	0	0	164050000	0	2060800000	1919000000	1077300000	285.18	66.412	0	0	500.33	0	643.293	544.805	332.752
Rv1178|Rv1178|Probable aminotransferase|362 AA	146570000	261720000	252410000	0	83746000	0	679260000	1561600000	1834300000	116.688	202.293	179.987	0	255.414	0	212.036	443.339	566.571
Rv0723|rplO|50S ribosomal protein L15 RplO|146 AA	934690000	440170000	428170000	0	51153000	0	842320000	1502600000	1007200000	744.13	340.224	305.316	0	156.01	0	262.936	426.589	311.1
Rv2429|ahpD|Alkyl hydroperoxide reductase D protein AhpD (alkyl hydroperoxidase D)|177 AA	140970000	329010000	100850000	0	110380000	0	1175300000	1539200000	1819200000	112.23	254.304	71.913	0	336.644	0	366.878	436.98	561.907
Rv3678A|Rv3678A|Conserved hypothetical protein|53 AA	677180000	592990000	348640000	0	0	31280000	764240000	1113500000	1099300000	539.12	458.344	248.605	0	0	119.17	238.563	316.123	339.547
Rv0717|rpsN1|30S ribosomal protein S14 RpsN1|61 AA	361440000	0	249450000	55801000	0	0	1300700000	1778800000	727480000	287.751	0	177.876	173.242	0	0	406.023	505.002	224.701
Rv3678c|Rv3678c|Conserved protein|151 AA	314900000	329550000	430700000	0	0	7293300	574490000	571460000	762190000	250.7	254.721	307.12	0	0	27.786	179.331	162.238	235.422
Rv1111c|Rv1111c|Conserved hypothetical protein|327 AA	100220000	79149000	100980000	0	10687000	0	1004100000	715680000	623530000	79.788	61.177	72.006	0	32.594	0	313.437	203.182	192.593
Rv1264|Rv1264|Adenylyl cyclase (ATP pyrophosphate-lyase) (adenylate cyclase)|397 AA	185900000	133270000	22057000	591830000	0	0	4393800000	2605400000	3594400000	148	103.009	15.728	1837.42	0	0	1371.56	739.675	1110.22
Rv2004c|Rv2004c|Conserved protein|498 AA	0	0	0	0	27607000	0	632820000	1260000000	1447000000	0	0	0	0	84.198	0	197.539	357.715	446.943
Rv3588c|canB|Beta-carbonic anhydrase CanB|207 AA	110470000	31786000	185720000	78410000	0	0	947930000	2108800000	1413400000	87.948	24.569	132.432	243.435	0	0	295.903	598.69	436.565
Rv3780|Rv3780|Conserved protein|178 AA	620620000	360170000	1217200000	95743000	0	0	1727000000	1734800000	1366000000	494.091	278.389	867.952	297.248	0	0	539.095	492.511	421.924
Rv0292|eccE3|ESX conserved component EccE3. ESX-3 type VII secretion system protein. Probable transmembrane protein.|331 AA	230700000	154870000	493710000	0	37437000	0	1077700000	1354600000	1197000000	183.666	119.705	352.051	0	114.178	0	336.412	384.572	369.724
Rv3048c|nrdF2|Ribonucleoside-diphosphate reductase (beta chain) NrdF2 (ribonucleotide reductase small subunit) (R2F protein)|324 AA	35683000	57724000	163480000	0	45360000	0	1228100000	1397900000	1576100000	28.408	44.617	116.573	0	138.342	0	383.36	396.865	486.819
Rv1070c|echA8|Probable enoyl-CoA hydratase EchA8 (enoyl hydrase) (unsaturated acyl-CoA hydratase) (crotonase)|257 AA	1652000000	200210000	830440000	97638000	0	0	1802000000	1918400000	2119500000	1315.2	154.75	592.164	303.131	0	0	562.507	544.635	654.662
Rv0683|rpsG|30S ribosomal protein S7 RpsG|156 AA	1702700000	703460000	1703600000	0	0	705960000	3755300000	3887600000	4181500000	1355.56	543.73	1214.79	0	0	2689.55	1172.24	1103.69	1291.56
Rv3390|lpqD|Probable conserved lipoprotein LpqD|236 AA	239740000	259010000	129220000	0	0	41537000	1529500000	1464300000	1612000000	190.863	200.198	92.143	0	0	158.246	477.444	415.716	497.908
Rv2993c|Rv2993c|Possible 2-hydroxyhepta-2	0	64977000	354140000	0	66135000	0	1680800000	2073700000	2090000000	0	50.223	252.527	0	201.703	0	524.673	588.725	645.55
Rv2536|Rv2536|Probable conserved transmembrane protein|230 AA	750890000	903850000	625640000	0	25756000	0	2119000000	1236100000	1291700000	597.802	698.619	446.127	0	78.552	0	661.461	350.93	398.975
Rv3200c|Rv3200c|Possible transmembrane cation transporter|355 AA	89493000	28507000	316420000	0	0	26294000	1573900000	1494200000	1431700000	71.248	22.034	225.63	0	0	100.174	491.304	424.204	442.217
Rv0333|Rv0333|Unknown protein|124 AA	124380000	96671000	102860000	13558000	0	0	785920000	1831100000	1182500000	99.022	74.721	73.347	42.093	0	0	245.33	519.85	365.246
Rv1641|infC|Probable initiation factor if-3 InfC|201 AA	406760000	619130000	332770000	45929000	0	0	3267100000	2037300000	1246900000	323.832	478.548	237.289	142.593	0	0	1019.85	578.391	385.137
Rv0708|rplP|50S ribosomal protein L16 RplP|138 AA	1258600000	871880000	749160000	0	68426000	0	1434300000	3579700000	1940100000	1002	673.908	534.205	0	208.69	0	447.727	1016.28	599.25
Rv1404|Rv1404|Probable transcriptional regulatory protein|160 AA	231250000	1033700000	1449900000	0	0	56478000	2693800000	2121900000	2274300000	184.104	798.985	1033.88	0	0	215.168	840.888	602.409	702.476
Rv3865|espF|ESX-1 secretion-associated protein EspF|103 AA	232230000	397790000	466760000	0	14897000	0	1175800000	1870200000	1673000000	184.884	307.467	332.834	0	45.434	0	367.034	530.951	516.749
Rv0467|icl1|Isocitrate lyase Icl (isocitrase) (isocitratase)|428 AA	932850000	738600000	665450000	205860000	0	0	2718400000	4691700000	3066300000	742.665	570.891	474.514	639.121	0	0	848.567	1331.98	947.106
Rv0703|rplW|50S ribosomal protein L23 RplW|100 AA	975460000	1126500000	1011300000	62827000	0	0	3220800000	2836600000	2463500000	776.588	870.714	721.13	195.055	0	0	1005.39	805.313	760.915
Rv0682|rpsL|30S ribosomal protein S12 RpsL|124 AA	299750000	462800000	0	96563000	0	0	2852800000	3572500000	3280300000	238.639	357.715	0	299.793	0	0	890.521	1014.24	1013.21
Rv3583c|Rv3583c|Possible transcription factor|162 AA	677100000	863950000	527200000	0	0	168960000	2956400000	4439200000	4244300000	539.056	667.779	375.932	0	0	643.699	922.861	1260.29	1310.96
Rv0164|TB18.5|Conserved protein TB18.5|161 AA	1560300000	2702200000	3825200000	1315900000	0	0	8587900000	4790800000	3428200000	1242.19	2088.63	2727.64	4085.39	0	0	2680.77	1360.11	1058.89
Rv2629|Rv2629|Conserved protein|374 AA	32976000	47931000	0	0	42218000	0	3212500000	3205800000	2766900000	26.253	37.048	0	0	128.759	0	1002.8	910.129	854.628
Rv2564|glnQ|Probable glutamine-transport ATP-binding protein ABC transporter GlnQ|330 AA	819740000	377200000	934410000	15033000	0	0	2516500000	2185800000	1737400000	652.616	291.552	666.302	46.672	0	0	785.543	620.55	536.641
Rv3597c|lsr2|Iron-regulated H-NS-like protein Lsr2|112 AA	2545500000	1966400000	451840000	0	0	228210000	4824800000	5902800000	5276900000	2026.54	1519.9	322.195	0	0	869.428	1506.1	1675.81	1629.91
Rv3804c|fbpA|Secreted antigen 85-a FbpA (mycolyl transferase 85A) (fibronectin-binding protein A) (antigen 85 complex A)|338 AA	1675600000	1049600000	1273600000	0	0	47745000	1716100000	4372300000	3943700000	1333.99	811.275	908.169	0	0	181.898	535.693	1241.3	1218.11
Rv0701|rplC|50S ribosomal protein L3 RplC|217 AA	656920000	1367300000	1879800000	50352000	0	0	4069100000	4052700000	4199200000	522.991	1056.84	1340.43	156.325	0	0	1270.2	1150.56	1297.03
Rv2909c|rpsP|30S ribosomal protein S16 RpsP|162 AA	1870700000	1152500000	871960000	62787000	0	0	3452900000	4644700000	4101700000	1489.31	890.81	621.77	194.931	0	0	1077.85	1318.63	1266.92
Rv0569|Rv0569|Conserved protein|88 AA	0	0	0	0	0	40292000	2793800000	4086400000	4481200000	0	0	0	0	0	153.503	872.104	1160.13	1384.13
Rv3134c|Rv3134c|Universal stress protein family protein|268 AA	0	0	0	0	0	7556700	3346700000	2241300000	1717900000	0	0	0	0	0	28.789	1044.7	636.307	530.618
Rv0641|rplA|50S ribosomal protein L1 RplA|235 AA	1904900000	2244300000	1409400000	0	35037000	0	5614700000	4211700000	3111300000	1516.54	1734.7	1005	0	106.858	0	1752.67	1195.7	961.005
Rv2111c|pup|Prokaryotic ubiquitin-like protein Pup|64 AA	1711100000	1622100000	734420000	0	0	2504200	1765100000	1400500000	1741900000	1362.25	1253.78	523.694	0	0	9.54	550.988	397.603	538.031
Rv2196|qcrB|Probable ubiquinol-cytochrome C reductase QcrB (cytochrome B subunit)|549 AA	450400000	320870000	660110000	11695000	0	0	3814600000	2757000000	2519600000	358.575	248.012	470.706	36.309	0	0	1190.75	782.714	778.243
Rv0905|echA6|Possible enoyl-CoA hydratase EchA6 (enoyl hydrase) (unsaturated acyl-CoA hydratase) (crotonase)|243 AA	313200000	872120000	2545500000	0	0	166100000	6291200000	5112300000	3713300000	249.346	674.094	1815.12	0	0	632.803	1963.84	1451.38	1146.95
Rv2624c|Rv2624c|Universal stress protein family protein|272 AA	0	0	0	0	32463000	0	5208300000	4097900000	4479100000	0	0	0	0	99.008	0	1625.81	1163.4	1383.48
Rv1996|Rv1996|Universal stress protein family protein|317 AA	0	0	41736000	0	36730000	0	4390100000	5474100000	3767400000	0	0	29.761	0	112.021	0	1370.4	1554.1	1163.66
Rv1321|Rv1321|Conserved hypothetical protein|226 AA	0	0	0	0	0	0	18857000	13531000	10838000	0	0	0	0	0	0	5.886	3.841	3.348
Rv1568|bioA|Adenosylmethionine-8-amino-7-oxononanoate aminotransferase BioA|437 AA	38676000	0	44067000	0	0	0	10243000	24674000	14161000	30.791	0	31.423	0	0	0	3.197	7.005	4.374
Rv3133c|devR|Two component transcriptional regulatory protein DevR (probably LuxR/UhpA-family)|217 AA	0	56066000	193850000	40854000	0	0	6537400000	6675200000	6832000000	0	43.335	138.229	126.837	0	0	2040.69	1895.09	2110.24
Rv2082|Rv2082|Conserved hypothetical protein|721 AA	99925000	54471000	0	0	0	0	11622000	20225000	19905000	79.553	42.103	0	0	0	0	3.628	5.742	6.148
Rv0475|hbhA|Iron-regulated heparin binding hemagglutinin HbhA (adhesin)|199 AA	4135800000	2888500000	3746400000	0	108110000	0	10233000000	15839000000	12851000000	3292.61	2232.63	2671.45	0	329.721	0	3194.3	4496.7	3969.36
Rv0102|Rv0102|Probable conserved integral membrane protein|661 AA	0	0	0	0	0	0	29374000	19611000	22469000	0	0	0	0	0	0	9.169	5.568	6.94
Rv3700c|Rv3700c|Conserved hypothetical protein|390 AA	0	21614000	0	0	0	0	49493000	11778000	25861000	0	16.706	0	0	0	0	15.45	3.344	7.988
Rv1439c|Rv1439c|Unknown protein|141 AA	0	0	0	0	0	0	18384000	14829000	57376000	0	0	0	0	0	0	5.739	4.21	17.722
Rv3116|moeB2|Probable molybdenum cofactor biosynthesis protein MoeB2 (MPT-synthase sulfurylase) (molybdopterin synthase sulphurylase)|389 AA	0	0	0	0	0	0	62694000	19849000	15956000	0	0	0	0	0	0	19.57	5.635	4.928
Rv2006|otsB1|Probable trehalose-6-phosphate phosphatase OtsB1 (trehalose-phosphatase) (TPP)|1327 AA	18452000	0	56953000	0	0	0	36403000	22946000	23600000	14.69	0	40.612	0	0	0	11.363	6.514	7.289
Rv1485|hemZ|Ferrochelatase HemZ (protoheme ferro-lyase) (heme synthetase)|344 AA	0	0	0	0	0	0	28128000	29846000	24942000	0	0	0	0	0	0	8.78	8.473	7.704
Rv2980|Rv2980|Possible conserved secreted protein|181 AA	0	0	0	0	0	0	30025000	22472000	32326000	0	0	0	0	0	0	9.373	6.38	9.985
Rv1868|Rv1868|Conserved hypothetical protein|699 AA	0	23179000	16338000	0	0	0	47246000	32766000	16614000	0	17.916	11.65	0	0	0	14.748	9.302	5.132
Rv0269c|Rv0269c|Conserved hypothetical protein|397 AA	339870000	0	0	0	0	0	47854000	37582000	14405000	270.579	0	0	0	0	0	14.938	10.67	4.449
Rv1687c|Rv1687c|Probable conserved ATP-binding protein ABC transporter|255 AA	14610000	0	39778000	0	0	0	56114000	25642000	19733000	11.631	0	28.365	0	0	0	17.516	7.28	6.095
Rv1839c|vapB13|Possible antitoxin VapB13|87 AA	0	29489000	17146000	0	0	0	26737000	26640000	42203000	0	22.793	12.226	0	0	0	8.346	7.563	13.035
Rv1514c|Rv1514c|Conserved hypothetical protein|262 AA	25240000	25982000	22788000	0	0	0	27142000	31848000	34603000	20.094	20.082	16.249	0	0	0	8.473	9.042	10.688
Rv0379|secE2|Possible protein transport protein SecE2|71 AA	2918500000	3702600000	4367500000	14973000	0	0	14368000000	7684900000	6110800000	2323.49	2861.88	3114.34	46.486	0	0	4485.07	2181.75	1887.48
Rv2532c|Rv2532c|Hypothetical protein|133 AA	62798000	84594000	128150000	0	0	0	55047000	21528000	28985000	49.995	65.386	91.38	0	0	0	17.183	6.112	8.953
Rv1352|Rv1352|Conserved protein|123 AA	146200000	211900000	211690000	0	0	0	33147000	29193000	34261000	116.394	163.785	150.95	0	0	0	10.347	8.288	10.582
Rv2016|Rv2016|Hypothetical protein|191 AA	0	0	0	0	0	0	37720000	57021000	16542000	0	0	0	0	0	0	11.775	16.188	5.109
Rv2637|dedA|Possible transmembrane protein DedA|218 AA	0	0	0	0	0	0	46481000	38135000	22057000	0	0	0	0	0	0	14.509	10.827	6.813
Rv0324|Rv0324|Possible transcriptional regulatory protein (possibly ArsR-family)|226 AA	0	30028000	0	0	0	0	29596000	79702000	15568000	0	23.21	0	0	0	0	9.239	22.627	4.809
Rv3702c|Rv3702c|Conserved hypothetical protein|233 AA	0	46090000	0	0	0	0	32142000	42276000	29451000	0	35.625	0	0	0	0	10.033	12.002	9.097
Rv2290|lppO|Probable conserved lipoprotein LppO|171 AA	0	207210000	79159000	0	0	0	44290000	32618000	28870000	0	160.16	56.446	0	0	0	13.825	9.26	8.917
Rv1424c|Rv1424c|Possible membrane protein|253 AA	84381000	0	0	0	0	0	26999000	39595000	40197000	67.178	0	0	0	0	0	8.428	11.241	12.416
Rv3120|Rv3120|Conserved hypothetical protein|200 AA	0	0	0	0	0	0	52621000	40817000	21975000	0	0	0	0	0	0	16.426	11.588	6.788
Rv2372c|Rv2372c|Conserved hypothetical protein|262 AA	0	0	70706000	0	0	0	57343000	27464000	31529000	0	0	50.418	0	0	0	17.9	7.797	9.739
Rv1610|Rv1610|Possible conserved membrane protein|235 AA	0	0	0	0	0	0	50863000	38056000	27555000	0	0	0	0	0	0	15.877	10.804	8.511
Rv0430|Rv0430|Conserved hypothetical protein|102 AA	45744000	43864000	69524000	0	0	0	16032000	80592000	40051000	36.418	33.904	49.576	0	0	0	5.005	22.88	12.371
Rv0673|echA4|Possible enoyl-CoA hydratase EchA4 (enoyl hydrase) (unsaturated acyl-CoA hydratase) (crotonase)|312 AA	0	49269000	0	0	0	0	42303000	23414000	64199000	0	38.082	0	0	0	0	13.205	6.647	19.83
Rv0802c|Rv0802c|Possible succinyltransferase in the GCN5-related N-acetyltransferase family|218 AA	60279000	0	0	0	0	0	44832000	44233000	31970000	47.99	0	0	0	0	0	13.995	12.558	9.875
Rv3571|kshB|Reductase component of 3-ketosteroid-9-alpha-hydroxylase KshB|358 AA	0	0	0	0	0	0	24853000	59367000	47062000	0	0	0	0	0	0	7.758	16.854	14.536
Rv2360c|Rv2360c|Unknown protein|142 AA	0	0	0	0	0	0	22959000	83322000	38068000	0	0	0	0	0	0	7.167	23.655	11.758
Rv0678|Rv0678|Conserved protein|165 AA	0	0	0	0	0	0	71720000	63587000	18045000	0	0	0	0	0	0	22.388	18.052	5.574
Rv2623|TB31.7|Universal stress protein family protein TB31.7|297 AA	144200000	0	120800000	0	101290000	0	27710000000	26497000000	25323000000	114.801	0	86.139	0	308.921	0	8649.87	7522.52	7821.66
Rv0422c|thiD|Probable phosphomethylpyrimidine kinase ThiD (HMP-phosphate kinase) (HMP-P kinase)|265 AA	0	0	0	0	0	0	82183000	31498000	35607000	0	0	0	0	0	0	25.654	8.942	10.998
Rv3308|pmmB|Probable phosphomannomutase PmmB (phosphomannose mutase)|534 AA	97604000	0	0	0	0	0	26954000	63398000	50914000	77.705	0	0	0	0	0	8.414	17.999	15.726
Rv2915c|Rv2915c|Conserved protein|370 AA	67528000	35430000	31831000	0	0	0	43668000	30691000	73121000	53.761	27.385	22.698	0	0	0	13.631	8.713	22.585
Rv2913c|Rv2913c|Possible D-amino acid aminohydrolase (D-amino acid hydrolase)|611 AA	0	0	0	0	0	0	33686000	41253000	71289000	0	0	0	0	0	0	10.515	11.712	22.019
Rv0490|senX3|Putative two component sensor histidine kinase SenX3|410 AA	90420000	17309000	19197000	0	0	0	266430000	2915800	174180000	71.986	13.379	13.689	0	0	0	83.168	0.828	53.8
Rv1420|uvrC|Probable excinuclease ABC (subunit C - nuclease) UvrC|646 AA	0	0	0	0	0	0	45719000	35702000	63640000	0	0	0	0	0	0	14.272	10.136	19.657
Rv1785c|cyp143|Probable cytochrome P450 143 Cyp143|393 AA	27486000	0	0	0	0	0	52972000	42492000	47598000	21.882	0	0	0	0	0	16.536	12.064	14.702
Rv2558|Rv2558|Conserved protein|236 AA	80467000	68318000	0	0	0	0	35073000	62651000	46600000	64.062	52.806	0	0	0	0	10.948	17.787	14.394
[truncated: 291 more rows]
